# Supplementary material
Source: HighWire-hosted journal article supplement (https://gut.bmj.com/content/gutjnl-2023-331237)
Supplement: inline-supplementary-material-2 [file inline-supplementary-material-2.pdf]

| geneid_human    | symbol_human | KRAS-mutant PARP-1<br>KO_vs_control_log2fc | KRAS-mutant PARP-1<br>KO_vs_control_pvalue |
|-----------------|--------------|--------------------------------------------|--------------------------------------------|
| ENSG00000136045 | PWP1         | 0,460180014                                | 0                                          |
| ENSG00000164002 | EXO5         | -3,290999889                               | 0                                          |
| ENSG00000167333 | TRIM68       | 0,489639997                                | 0                                          |
| ENSG00000104361 | NIPAL2       | -0,876420021                               | 0                                          |
| ENSG00000124783 | SSR1         | 0,656780005                                | 0                                          |
| ENSG00000136159 | NUDT15       | -0,59266001                                | 0                                          |
| ENSG00000143799 | PARP1        | -2,713370085                               | 0                                          |
| ENSG00000167074 | TEF          | -1,062059999                               | 0                                          |
| ENSG00000198900 | TOP1         | 0,620440006                                | 0                                          |
| ENSG00000002549 | LAP3         | 0,689549983                                | 0                                          |
| ENSG00000136869 | TLR4         | -4,733809948                               | 0                                          |
| ENSG00000179776 | CDH5         | -17,38200951                               | 0                                          |
| ENSG00000100003 | SEC14L2      | -0,665260017                               | 0                                          |
| ENSG00000013375 | PGM3         | 0,681770027                                | 0                                          |
| ENSG00000197771 | MCMBP        | 0,247240007                                | 0                                          |
| ENSG00000118816 | CCNI         | -0,507700026                               | 0                                          |
| ENSG00000115504 | EHBP1        | -0,590110004                               | 0                                          |
| ENSG00000122026 | RPL21        | -0,489259988                               | 0                                          |
| ENSG00000079332 | SAR1A        | 0,267690003                                | 0                                          |
| ENSG00000141664 | ZCCHC2       | 0,546389997                                | 0                                          |
| ENSG00000186184 | POLR1D       | -0,700079978                               | 0                                          |
| ENSG00000094661 | OR11I1       | 14,62584972                                | 0                                          |
| ENSG00000138641 | HERC3        | -0,750199974                               | 0                                          |
| ENSG00000182827 | ACBD3        | 0,287559986                                | 0                                          |
| ENSG00000244462 | RBM12        | 0,328110009                                | 0                                          |
| ENSG00000164161 | HHIP         | -2,210939884                               | 0                                          |
| ENSG00000175792 | RUVBL1       | 0,438820004                                | 0                                          |
| ENSG00000177096 | PHETA2       | -3,373600006                               | 0                                          |
| ENSG00000169744 | LDB2         | 2,646199942                                | 0                                          |
| ENSG00000168439 | STIP1        | 0,501139998                                | 0                                          |
| ENSG00000188921 | HACD4        | -4,588419914                               | 0                                          |
| ENSG00000214357 | NEURL1B      | -1,686759949                               | 0                                          |
| ENSG00000198018 | ENTPD7       | 0,874430001                                | 0                                          |
| ENSG00000001461 | NIPAL3       | -0,31626001                                | 0                                          |
| ENSG00000138095 | LRPPRC       | 0,311760008                                | 0                                          |
| ENSG00000169174 | PCSK9        | -2,006789923                               | 0                                          |
| ENSG00000244754 | N4BP2L2      | -0,562269986                               | 0                                          |
| ENSG00000141452 | RMC1         | 0,48635                                    | 0                                          |
| ENSG00000026297 | RNASET2      | 0,623030007                                | 0                                          |
| ENSG00000169398 | PTK2         | -0,31279999                                | 0                                          |
| ENSG00000100439 | ABHD4        | -0,693610013                               | 0                                          |
| ENSG00000132718 | SYT11        | -1,688220024                               | 0                                          |
| ENSG00000122741 | DCAF10       | -0,428640008                               | 0                                          |
| ENSG00000092148 | HECTD1       | -0,299210012                               | 0                                          |
| ENSG00000165025 | SYK          | -1,143429995                               | 0,00001                                    |

|                 |          |              |         |
|-----------------|----------|--------------|---------|
| ENSG00000162998 | FRZB     | -3,805700064 | 0,00001 |
| ENSG00000173040 | EVC2     | -6,503220081 | 0,00001 |
| ENSG00000136156 | ITM2B    | -0,576479971 | 0,00001 |
| ENSG00000169410 | PTPN9    | -0,513750017 | 0,00001 |
| ENSG00000134884 | ARGLU1   | -0,668099999 | 0,00001 |
| ENSG00000108342 | CSF3     | 5,127679825  | 0,00001 |
| ENSG00000164300 | SERINC5  | -0,736310005 | 0,00001 |
| ENSG00000155438 | NIFK     | 0,671000004  | 0,00001 |
| ENSG00000117395 | EBNA1BP2 | 0,444499999  | 0,00001 |
| ENSG0000013392  | RWDD2A   | 0,812709987  | 0,00001 |
| ENSG00000108819 | PPP1R9B  | 0,369780004  | 0,00002 |
| ENSG00000174840 | PDE12    | 0,588680029  | 0,00002 |
| ENSG00000129654 | FOXJ1    | -3,187489986 | 0,00002 |
| ENSG00000114374 | USP9Y    | -7,678070068 | 0,00002 |
| ENSG00000183580 | FBXL7    | 6,1738801    | 0,00002 |
| ENSG00000117528 | ABCD3    | -0,244420007 | 0,00002 |
| ENSG00000179242 | CDH4     | 2,508450031  | 0,00002 |
| ENSG00000185262 | UBALD2   | -0,884159982 | 0,00002 |
| ENSG00000146376 | ARHGAP18 | 3,297950029  | 0,00002 |
| ENSG00000271447 | MMP28    | -3,765059948 | 0,00002 |
| ENSG00000137713 | PPP2R1B  | 0,472930014  | 0,00002 |
| ENSG00000225921 | NOL7     | 0,393180013  | 0,00002 |
| ENSG00000198331 | HYLS1    | -0,517639995 | 0,00002 |
| ENSG00000171295 | ZNF440   | -0,476350009 | 0,00002 |
| ENSG00000106028 | SSBP1    | 0,408100009  | 0,00003 |
| ENSG00000166197 | NOLC1    | 0,507210016  | 0,00003 |
| ENSG00000102524 | TNFSF13B | -1,86006999  | 0,00003 |
| ENSG00000101166 | PRELID3B | 0,474519998  | 0,00003 |
| ENSG00000158856 | DMTN     | -0,770780027 | 0,00003 |
| ENSG00000105131 | EPHX3    | -4,704909801 | 0,00003 |
| ENSG00000125999 | BPIFB1   | 14,17156029  | 0,00003 |
| ENSG00000168497 | CAVIN2   | -2,10571003  | 0,00003 |
| ENSG00000204713 | TRIM27   | 0,554459989  | 0,00003 |
| ENSG00000101052 | IFT52    | 0,372990012  | 0,00003 |
| ENSG00000141933 | TPGS1    | -0,66286999  | 0,00003 |
| ENSG00000152127 | MGAT5    | -0,550800025 | 0,00003 |
| ENSG00000169919 | GUSB     | -0,383980006 | 0,00004 |
| ENSG00000072134 | EPN2     | 0,44382      | 0,00004 |
| ENSG00000251258 | RFPL4B   | -5,205910206 | 0,00004 |
| ENSG00000152795 | HNRNPDL  | 0,278109998  | 0,00004 |
| ENSG00000149243 | KLHL35   | -2,675260067 | 0,00006 |
| ENSG00000099958 | DERL3    | 1,859410048  | 0,00006 |
| ENSG00000165475 | CRYL1    | -0,60503     | 0,00006 |
| ENSG00000163683 | SMIM14   | -0,800109982 | 0,00006 |
| ENSG00000106823 | ECM2     | 2,925519943  | 0,00007 |
| ENSG00000196199 | MPHOSPH8 | -0,872409999 | 0,00007 |
| ENSG00000165887 | ANKRD2   | -2,646270037 | 0,00007 |

|                 |          |              |         |
|-----------------|----------|--------------|---------|
| ENSG00000144115 | THNSL2   | -3,917299986 | 0,00008 |
| ENSG00000119812 | FAM98A   | 0,46518001   | 0,00008 |
| ENSG00000069869 | NEDD4    | -0,777639985 | 0,00008 |
| ENSG00000135314 | KHDC1    | -1,252629995 | 0,00009 |
| ENSG00000163220 | S100A9   | 4,822780132  | 0,00009 |
| ENSG00000182809 | CRIP2    | -1,468969941 | 0,00009 |
| ENSG00000166598 | HSP90B1  | 0,670639992  | 0,00009 |
| ENSG00000070159 | PTPN3    | -0,517440021 | 0,00009 |
| ENSG00000067048 | DDX3Y    | -6,476799965 | 0,0001  |
| ENSG00000129691 | ASH2L    | -0,271829993 | 0,0001  |
| ENSG00000148110 | MFSD14B  | -0,28994     | 0,00011 |
| ENSG00000163359 | COL6A3   | -3,220809937 | 0,00011 |
| ENSG00000119953 | SMNDC1   | 0,435339987  | 0,00011 |
| ENSG00000012817 | KDM5D    | -6,358960152 | 0,00012 |
| ENSG00000162733 | DDR2     | -2,699909925 | 0,00013 |
| ENSG00000265241 | RBM8A    | 0,243670002  | 0,00013 |
| ENSG00000101280 | ANGPT4   | 3,951839924  | 0,00013 |
| ENSG00000175029 | CTBP2    | 0,231409997  | 0,00014 |
| ENSG00000165125 | TRPV6    | 2,40651989   | 0,00015 |
| ENSG00000151233 | GXYLT1   | 0,369599998  | 0,00015 |
| ENSG00000112081 | SRSF3    | 0,390329987  | 0,00016 |
| ENSG00000137868 | STRA6    | -2,970000029 | 0,00017 |
| ENSG00000166228 | PCBD1    | 0,213249996  | 0,00017 |
| ENSG00000148840 | PPRC1    | 0,475329995  | 0,00019 |
| ENSG00000137747 | TMPRSS13 | 3,154839993  | 0,00019 |
| ENSG00000128228 | SDF2L1   | 1,446799994  | 0,0002  |
| ENSG00000125170 | DOK4     | -0,603290021 | 0,0002  |
| ENSG00000155660 | PDIA4    | 0,877020001  | 0,00021 |
| ENSG00000133028 | SCO1     | 0,499769986  | 0,00021 |
| ENSG00000130045 | NXNL2    | -2,096390009 | 0,00022 |
| ENSG00000108651 | UTP6     | 0,320919991  | 0,00023 |
| ENSG00000103051 | COG4     | -0,29260999  | 0,00023 |
| ENSG00000139644 | TMBIM6   | -0,348340005 | 0,00025 |
| ENSG00000110900 | TSPAN11  | -1,263380051 | 0,00026 |
| ENSG00000071539 | TRIP13   | 0,473369986  | 0,00026 |
| ENSG00000115363 | EVA1A    | -2,19968009  | 0,00028 |
| ENSG00000123600 | METTL8   | 0,351440012  | 0,00028 |
| ENSG00000006744 | ELAC2    | 0,54697001   | 0,00028 |
| ENSG00000169583 | CLIC3    | -2,583039999 | 0,00028 |
| ENSG00000185917 | SETD4    | 0,350760013  | 0,00029 |
| ENSG00000198246 | SLC29A3  | -1,210420012 | 0,0003  |
| ENSG00000115053 | NCL      | 0,380409986  | 0,00032 |
| ENSG00000171865 | RNASEH1  | 0,291280001  | 0,00032 |
| ENSG00000140481 | CCDC33   | -2,503619909 | 0,00033 |
| ENSG00000107263 | RAPGEF1  | -0,412440002 | 0,00034 |
| ENSG00000105323 | HNRNPUL1 | -0,336219996 | 0,00034 |
| ENSG00000114654 | EFCC1    | 4,341760159  | 0,00037 |

|                 |            |              |         |
|-----------------|------------|--------------|---------|
| ENSG00000182752 | PAPPA      | 2,431479931  | 0,00037 |
| ENSG00000151576 | QTRT2      | 0,451990008  | 0,00037 |
| ENSG00000165490 | DDIAS      | 0,415250003  | 0,00037 |
| ENSG00000138796 | HADH       | -0,193169996 | 0,00037 |
| ENSG00000168447 | SCNN1B     | 3,605969906  | 0,00037 |
| ENSG00000065325 | GLP2R      | -1,893939972 | 0,0004  |
| ENSG00000165959 | CLMN       | -1,004840016 | 0,00041 |
| ENSG00000124228 | DDX27      | 0,404320002  | 0,00043 |
| ENSG00000162692 | VCAM1      | -2,200279951 | 0,00046 |
| ENSG00000150401 | DCUN1D2    | -0,662389994 | 0,00047 |
| ENSG00000183878 | UTY        | -7,876709938 | 0,00047 |
| ENSG00000136813 | ECPAS      | -0,248099998 | 0,00049 |
| ENSG00000239306 | RBM14      | 0,464590013  | 0,0005  |
| ENSG00000100106 | TRIOBP     | -0,604579985 | 0,00051 |
| ENSG00000107796 | ACTA2      | -1,385139942 | 0,00052 |
| ENSG00000062598 | ELMO2      | 0,447670013  | 0,00053 |
| ENSG00000124067 | SLC12A4    | -0,807780027 | 0,00054 |
| ENSG00000103415 | HMOX2      | 0,441240013  | 0,00054 |
| ENSG00000144182 | LIPT1      | 0,728910029  | 0,00054 |
| ENSG00000265354 | TIMM23     | 0,370189995  | 0,00055 |
| ENSG00000166689 | PLEKHA7    | -1,153239965 | 0,00056 |
| ENSG00000115946 | PNO1       | 0,799700022  | 0,00056 |
| ENSG00000130270 | ATP8B3     | -0,792240024 | 0,0006  |
| ENSG00000120800 | UTP20      | 0,519860029  | 0,0006  |
| ENSG00000114503 | NCBP2      | 0,464020014  | 0,00061 |
| ENSG00000136143 | SUCLA2     | -0,500590026 | 0,00062 |
| ENSG00000131374 | TBC1D5     | -0,307090014 | 0,00062 |
| ENSG00000184164 | CRELD2     | 0,966509998  | 0,00062 |
| ENSG00000111077 | TNS2       | -0,635100007 | 0,00063 |
| ENSG00000099994 | SUSD2      | -2,663170099 | 0,00065 |
| ENSG00000102763 | VWA8       | -0,428600013 | 0,00066 |
| ENSG00000281613 | AL365214.3 | -4,467740059 | 0,00068 |
| ENSG00000184897 | H1FX       | -0,544439971 | 0,0007  |
| ENSG00000116455 | WDR77      | 0,800949991  | 0,0007  |
| ENSG00000161896 | IP6K3      | -3,920830011 | 0,00071 |
| ENSG00000186187 | ZNRF1      | -0,272419989 | 0,00075 |
| ENSG00000101230 | ISM1       | 1,39380002   | 0,00079 |
| ENSG00000178031 | ADAMTSL1   | -3,0432899   | 0,00082 |
| ENSG00000164187 | LMBRD2     | -0,418500006 | 0,00083 |
| ENSG00000123739 | PLA2G12A   | -0,345660001 | 0,00084 |
| ENSG00000171060 | C8orf74    | -4,646389961 | 0,00085 |
| ENSG00000162891 | IL20       | 5,205180168  | 0,00088 |
| ENSG00000107651 | SEC23IP    | 0,404890001  | 0,00089 |
| ENSG00000106771 | TMEM245    | -0,54361999  | 0,00089 |
| ENSG00000166473 | PKD1L2     | -1,973799944 | 0,0009  |
| ENSG00000102595 | UGGT2      | -0,711650014 | 0,0009  |
| ENSG00000107949 | BCCIP      | 0,389450014  | 0,0009  |

|                 |            |              |         |
|-----------------|------------|--------------|---------|
| ENSG00000132481 | TRIM47     | -1,486369967 | 0,00091 |
| ENSG00000137875 | BCL2L10    | -4,102290154 | 0,00092 |
| ENSG00000138380 | CARF       | -0,861919999 | 0,00092 |
| ENSG00000154188 | ANGPT1     | -1,569409966 | 0,00092 |
| ENSG00000115241 | PPM1G      | 0,240349993  | 0,00093 |
| ENSG00000115008 | IL1A       | 4,373449802  | 0,00094 |
| ENSG00000170113 | NIPA1      | -0,383830011 | 0,00094 |
| ENSG00000130818 | ZNF426     | -1,241369963 | 0,00096 |
| ENSG00000113389 | NPR3       | -2,553040028 | 0,00097 |
| ENSG00000141696 | P3H4       | 0,577859998  | 0,00101 |
| ENSG00000163703 | CRELD1     | 0,573700011  | 0,00101 |
| ENSG00000105011 | ASF1B      | -0,499779999 | 0,00102 |
| ENSG00000151849 | CENPJ      | -0,566590011 | 0,00103 |
| ENSG00000180776 | ZDHHC20    | -0,792739987 | 0,00106 |
| ENSG00000101146 | RAE1       | 0,444929987  | 0,0011  |
| ENSG00000111644 | ACRBP      | -1,301249981 | 0,00112 |
| ENSG00000143458 | GABPB2     | -0,508149981 | 0,00113 |
| ENSG00000196576 | PLXNB2     | -0,596069992 | 0,00114 |
| ENSG00000170855 | TRIAP1     | 0,334630013  | 0,0012  |
| ENSG00000079337 | RAPGEF3    | -1,638419986 | 0,0012  |
| ENSG00000127329 | PTPRB      | -2,260289907 | 0,00121 |
| ENSG00000251012 | AC083800.1 | 13,69517994  | 0,00126 |
| ENSG00000102699 | PARP4      | -0,984080017 | 0,00126 |
| ENSG00000172006 | ZNF554     | -0,537220001 | 0,00127 |
| ENSG00000154229 | PRKCA      | -1,019919991 | 0,00129 |
| ENSG00000168502 | MTCL1      | -0,648829997 | 0,00129 |
| ENSG00000177025 | C19orf18   | -3,550209999 | 0,00131 |
| ENSG00000125968 | ID1        | -1,678640008 | 0,00132 |
| ENSG00000275342 | PRAG1      | -1,850700021 | 0,00133 |
| ENSG00000165806 | CASP7      | 0,278270006  | 0,00137 |
| ENSG00000025800 | KPNA6      | 0,207699999  | 0,00143 |
| ENSG00000144591 | GMPPA      | 0,610610008  | 0,00143 |
| ENSG00000183317 | EPHA10     | 0,71566999   | 0,00143 |
| ENSG00000109519 | GRPEL1     | 0,630469978  | 0,00144 |
| ENSG00000140368 | PSTPIP1    | -3,2348001   | 0,00146 |
| ENSG00000227057 | WDR46      | 0,437720001  | 0,00147 |
| ENSG00000205531 | NAP1L4     | 0,265100002  | 0,00149 |
| ENSG00000136244 | IL6        | 3,912450075  | 0,00151 |
| ENSG00000096384 | HSP90AB1   | 0,512530029  | 0,00151 |
| ENSG00000198758 | EPS8L3     | 2,837759972  | 0,00152 |
| ENSG00000164117 | FBXO8      | -0,383410007 | 0,00153 |
| ENSG00000124383 | MPHOSPH10  | 0,456149995  | 0,00155 |
| ENSG00000158042 | MRPL17     | 0,481130004  | 0,00157 |
| ENSG00000170909 | OSCAR      | 1,872810006  | 0,00158 |
| ENSG00000140157 | NIPA2      | -0,423629999 | 0,00159 |
| ENSG00000198824 | CHAMP1     | -0,567990005 | 0,0016  |
| ENSG00000121741 | ZMYM2      | -0,526870012 | 0,00162 |

|                 |          |              |         |
|-----------------|----------|--------------|---------|
| ENSG00000107643 | MAPK8    | 0,499540001  | 0,00168 |
| ENSG00000103489 | XYLT1    | 3,294159889  | 0,00169 |
| ENSG00000185737 | NRG3     | 4,749879837  | 0,0017  |
| ENSG00000185338 | SOCS1    | 2,120729923  | 0,0017  |
| ENSG00000102466 | FGF14    | -2,248409986 | 0,00173 |
| ENSG00000198804 | MT-CO1   | -0,38714999  | 0,00175 |
| ENSG00000147854 | UHRF2    | -0,369870007 | 0,00176 |
| ENSG00000143870 | PDIA6    | 0,501380026  | 0,00176 |
| ENSG00000005102 | MEOX1    | -2,556090117 | 0,00177 |
| ENSG00000129009 | ISLR     | -3,665999889 | 0,00178 |
| ENSG00000103429 | BFAR     | 0,272689998  | 0,00182 |
| ENSG00000198898 | CAPZA2   | -0,304179996 | 0,00183 |
| ENSG00000115761 | NOL10    | 0,406040013  | 0,00184 |
| ENSG00000088448 | ANKRD10  | -0,96837002  | 0,00184 |
| ENSG00000143546 | S100A8   | 5,300630093  | 0,00187 |
| ENSG00000151224 | MAT1A    | 2,960289955  | 0,00188 |
| ENSG00000005156 | LIG3     | 0,347640008  | 0,00194 |
| ENSG00000136104 | RNASEH2B | -0,567260027 | 0,00194 |
| ENSG00000148337 | CIZ1     | -0,571879983 | 0,00199 |
| ENSG00000142619 | PADI3    | -1,918449998 | 0,00199 |
| ENSG00000114767 | RRP9     | 0,56825      | 0,002   |
| ENSG00000104093 | DMXL2    | -0,451299995 | 0,00201 |
| ENSG00000170454 | KRT75    | -3,356869936 | 0,00205 |
| ENSG00000185437 | SH3BGR   | -1,853839993 | 0,00206 |
| ENSG00000134321 | RSAD2    | 2,550930023  | 0,00209 |
| ENSG00000070729 | CNGB1    | -1,994830012 | 0,00209 |
| ENSG00000152520 | PAN3     | -0,351139992 | 0,0021  |
| ENSG00000079112 | CDH17    | -3,294209957 | 0,00214 |
| ENSG00000113916 | BCL6     | -0,862119973 | 0,00219 |
| ENSG00000213337 | ANKRD39  | 0,594299972  | 0,00221 |
| ENSG00000116209 | TMEM59   | -0,290989995 | 0,00221 |
| ENSG00000102962 | CCL22    | 2,351289988  | 0,00222 |
| ENSG00000145050 | MANF     | 0,765879989  | 0,00224 |
| ENSG00000106991 | ENG      | -2,138370037 | 0,00227 |
| ENSG00000078295 | ADCY2    | 4,371719837  | 0,00228 |
| ENSG00000112624 | BICRAL   | -0,496230006 | 0,00229 |
| ENSG00000077942 | FBLN1    | -0,691460013 | 0,00229 |
| ENSG00000137440 | FGFBP1   | -3,711220026 | 0,00232 |
| ENSG00000128591 | FLNC     | -0,829789996 | 0,00233 |
| ENSG00000126787 | DLGAP5   | -0,840510011 | 0,00233 |
| ENSG00000221164 | SNORA11F | 1,44303      | 0,00233 |
| ENSG00000175544 | CABP4    | -4,388929844 | 0,00233 |
| ENSG00000130988 | RGN      | -5,189360142 | 0,00234 |
| ENSG00000079974 | RABL2B   | 0,650370002  | 0,00235 |
| ENSG00000181610 | MRPS23   | 0,321269989  | 0,00235 |
| ENSG00000169184 | MN1      | -1,231490016 | 0,00236 |
| ENSG00000006607 | FARP2    | 0,500919998  | 0,00237 |

|                 |          |              |         |
|-----------------|----------|--------------|---------|
| ENSG00000134602 | STK26    | 0,629109979  | 0,00241 |
| ENSG0000004478  | FKBP4    | 0,724479973  | 0,00242 |
| ENSG00000132507 | EIF5A    | 0,395900011  | 0,00242 |
| ENSG00000283740 | TAF11L11 | -4,224150181 | 0,00243 |
| ENSG00000163218 | PGLYRP4  | 6,371250153  | 0,00244 |
| ENSG00000105643 | ARRDC2   | -0,640999973 | 0,00246 |
| ENSG00000160179 | ABCG1    | 1,418149948  | 0,00246 |
| ENSG00000197110 | IFNL3    | 3,094189882  | 0,00248 |
| ENSG00000188124 | OR2AG2   | 0,93096      | 0,00249 |
| ENSG00000130159 | ECSIT    | -0,550930023 | 0,0025  |
| ENSG00000118515 | SGK1     | 2,274310112  | 0,00253 |
| ENSG00000107738 | VSIR     | -1,134320021 | 0,00253 |
| ENSG00000163138 | PACRGL   | 0,483940005  | 0,00254 |
| ENSG00000105246 | EBI3     | 2,415400028  | 0,00255 |
| ENSG00000110104 | CCDC86   | 0,584110022  | 0,00257 |
| ENSG00000269466 | H3.Y     | -5,95031023  | 0,00263 |
| ENSG00000106538 | RARRES2  | -1,423370004 | 0,00265 |
| ENSG00000139915 | MDGA2    | 1,947229981  | 0,0027  |
| ENSG00000174950 | CD164L2  | -3,21765995  | 0,00276 |
| ENSG00000145241 | CENPC    | -0,546410024 | 0,00282 |
| ENSG00000135211 | TMEM60   | -0,540489972 | 0,00283 |
| ENSG00000120699 | EXOSC8   | -0,556940019 | 0,00286 |
| ENSG00000122406 | RPL5     | -0,323599994 | 0,00286 |
| ENSG00000172159 | FRMD3    | -1,293630004 | 0,00287 |
| ENSG00000134326 | CMPK2    | 1,372230053  | 0,00287 |
| ENSG00000158417 | EIF5B    | 0,314029992  | 0,00288 |
| ENSG00000104047 | DTWD1    | -0,293540001 | 0,0029  |
| ENSG00000154114 | TBCEL    | 0,4912       | 0,00296 |
| ENSG00000140526 | ABHD2    | -0,560760021 | 0,00298 |
| ENSG00000106605 | BLVRA    | -0,341789991 | 0,00304 |
| ENSG00000162896 | PIGR     | 3,163110018  | 0,00305 |
| ENSG00000121075 | TBX4     | -3,119149923 | 0,00305 |
| ENSG00000162885 | B3GALNT2 | 0,319330007  | 0,00306 |
| ENSG00000185585 | OLFML2A  | -2,61390996  | 0,00307 |
| ENSG00000139832 | RAB20    | -1,271989942 | 0,00316 |
| ENSG00000105968 | H2AFV    | -0,388579994 | 0,0032  |
| ENSG00000136861 | CDK5RAP2 | -0,37560001  | 0,00322 |
| ENSG00000147155 | EBP      | -1,416290045 | 0,00323 |
| ENSG00000184908 | CLCNKB   | -3,653919935 | 0,00323 |
| ENSG00000173145 | NOC3L    | 0,51424998   | 0,00326 |
| ENSG00000047457 | CP       | -0,91069001  | 0,00329 |
| ENSG00000155287 | SLC25A28 | 0,41317001   | 0,0033  |
| ENSG00000132394 | EEFSEC   | -0,330190003 | 0,00334 |
| ENSG00000178057 | NDUFAF3  | 0,664629996  | 0,00336 |
| ENSG00000111802 | TDP2     | 0,436450005  | 0,00338 |
| ENSG00000095370 | SH2D3C   | -2,251039982 | 0,00338 |
| ENSG00000100292 | HMOX1    | -1,122230053 | 0,00346 |

|                 |         |              |         |
|-----------------|---------|--------------|---------|
| ENSG00000131711 | MAP1B   | 0,736970007  | 0,00351 |
| ENSG00000131143 | COX4I1  | -0,279650003 | 0,00366 |
| ENSG00000053372 | MRTO4   | 0,351779997  | 0,0038  |
| ENSG00000058404 | CAMK2B  | -1,207849979 | 0,00384 |
| ENSG00000154174 | TOMM70  | 0,341239989  | 0,00386 |
| ENSG00000069424 | KCNAB2  | 0,752950013  | 0,00387 |
| ENSG00000132953 | XPO4    | -0,523859978 | 0,00389 |
| ENSG00000164125 | FAM198B | -2,698040009 | 0,00396 |
| ENSG00000107959 | PITRM1  | 0,452800006  | 0,00397 |
| ENSG00000180817 | PPA1    | 0,274619997  | 0,00397 |
| ENSG00000007062 | PROM1   | 3,363820076  | 0,00397 |
| ENSG00000132819 | RBM38   | 1,110759974  | 0,004   |
| ENSG00000084623 | EIF3I   | 0,377939999  | 0,00407 |
| ENSG00000101843 | PSMD10  | 0,256229997  | 0,0041  |
| ENSG00000182580 | EPHB3   | -0,830500007 | 0,00413 |
| ENSG00000114268 | PFKFB4  | -1,180750012 | 0,00416 |
| ENSG00000065548 | ZC3H15  | 0,370799989  | 0,00416 |
| ENSG00000118705 | RPN2    | 0,320499986  | 0,00417 |
| ENSG00000154914 | USP43   | 0,38567999   | 0,00421 |
| ENSG00000100767 | PAPLN   | -1,723520041 | 0,00423 |
| ENSG00000132792 | CTNBL1  | 0,397280008  | 0,00423 |
| ENSG00000065243 | PKN2    | -0,263790011 | 0,00425 |
| ENSG00000122042 | UBL3    | -0,349869996 | 0,00427 |
| ENSG00000005810 | MYCBP2  | -0,458169997 | 0,00427 |
| ENSG00000073331 | ALPK1   | -0,370689988 | 0,00432 |
| ENSG00000197694 | SPTAN1  | -0,553849995 | 0,00433 |
| ENSG00000136122 | BORA    | -0,506879985 | 0,00433 |
| ENSG00000163170 | BOLA3   | 0,320650011  | 0,00437 |
| ENSG00000066422 | ZBTB11  | 0,384160012  | 0,00437 |
| ENSG00000072952 | MRVI1   | -1,529060006 | 0,00439 |
| ENSG00000127663 | KDM4B   | -0,406150013 | 0,00444 |
| ENSG00000146021 | KLHL3   | -1,08209002  | 0,00446 |
| ENSG00000163312 | HELQ    | -0,349350005 | 0,0045  |
| ENSG00000188483 | IER5L   | -1,359240055 | 0,0045  |
| ENSG00000125089 | SH3TC1  | -1,07494998  | 0,00455 |
| ENSG00000150471 | ADGRL3  | 1,471429944  | 0,00458 |
| ENSG00000137364 | TPMT    | 0,377490014  | 0,00461 |
| ENSG00000164292 | RHOBTB3 | -1,382660031 | 0,00463 |
| ENSG00000085415 | SEH1L   | 0,309579998  | 0,00464 |
| ENSG00000147804 | SLC39A4 | 0,453339994  | 0,00466 |
| ENSG00000013297 | CLDN11  | -3,643620014 | 0,0047  |
| ENSG00000197457 | STMN3   | -0,915430009 | 0,00471 |
| ENSG00000120662 | MTRF1   | -0,341879994 | 0,00471 |
| ENSG00000105889 | STEAP1B | 3,419549942  | 0,00475 |
| ENSG00000115486 | GGCX    | 0,242160007  | 0,00483 |
| ENSG00000131188 | PRR7    | -0,802209973 | 0,00485 |
| ENSG00000132024 | CC2D1A  | -0,370079994 | 0,00486 |



|                 |          |              |         |
|-----------------|----------|--------------|---------|
| ENSG00000170579 | DLGAP1   | 2,600509882  | 0,00494 |
| ENSG00000135457 | TFCP2    | 0,243819997  | 0,00496 |
| ENSG00000182177 | ASB18    | -1,273900032 | 0,00502 |
| ENSG00000050393 | MCUR1    | 0,382669985  | 0,00508 |
| ENSG00000166562 | SEC11C   | 0,37213999   | 0,00513 |
| ENSG00000139618 | BRCA2    | -0,54569     | 0,00523 |
| ENSG00000070018 | LRP6     | -0,26749     | 0,00531 |
| ENSG00000135372 | NAT10    | 0,507950008  | 0,00538 |
| ENSG00000141668 | CBLN2    | 4,179279804  | 0,00546 |
| ENSG00000069667 | RORA     | -1,045629978 | 0,00549 |
| ENSG00000117450 | PRDX1    | 0,867810011  | 0,00551 |
| ENSG00000205129 | C4orf47  | -1,258620024 | 0,00553 |
| ENSG00000182150 | ERCC6L2  | -0,375699997 | 0,00554 |
| ENSG00000196074 | SYCP2    | -1,642539978 | 0,00557 |
| ENSG00000143771 | CNIH4    | -0,267159998 | 0,00565 |
| ENSG00000204396 | VWA7     | -1,040359974 | 0,00567 |
| ENSG00000130518 | IQCIN    | -1,878849983 | 0,00569 |
| ENSG00000004059 | ARF5     | -0,229760006 | 0,00569 |
| ENSG00000145495 | MARCH6   | -0,207100004 | 0,00575 |
| ENSG00000173575 | CHD2     | -0,655939996 | 0,00577 |
| ENSG00000090863 | GLG1     | -0,448610008 | 0,00582 |
| ENSG00000165097 | KDM1B    | 0,953499973  | 0,00585 |
| ENSG00000130731 | METTL26  | 0,468290001  | 0,00597 |
| ENSG00000006634 | DBF4     | -0,408369988 | 0,00606 |
| ENSG00000140836 | ZFH3     | -0,476229995 | 0,00613 |
| ENSG00000164978 | NUDT2    | -0,853739977 | 0,00621 |
| ENSG00000114902 | SPCS1    | 0,261970013  | 0,00624 |
| ENSG00000136688 | IL36G    | 3,603569984  | 0,00633 |
| ENSG00000172819 | RARG     | -0,506489992 | 0,00634 |
| ENSG00000113240 | CLK4     | -0,465079993 | 0,00634 |
| ENSG00000101109 | STK4     | 0,465570003  | 0,00634 |
| ENSG00000115109 | EPB41L5  | 0,421490014  | 0,00635 |
| ENSG00000156475 | PPP2R2B  | 4,572619915  | 0,00637 |
| ENSG00000119711 | ALDH6A1  | 0,359200001  | 0,00638 |
| ENSG00000139044 | B4GALNT3 | 0,777660012  | 0,0064  |
| ENSG00000124207 | CSE1L    | 0,371939987  | 0,00642 |
| ENSG00000133138 | TBC1D8B  | -0,491560012 | 0,00643 |
| ENSG00000196449 | YRDC     | 0,581799984  | 0,00648 |
| ENSG00000164306 | PRIMPOL  | -0,659049988 | 0,00649 |
| ENSG00000204308 | RNF5     | 0,778970003  | 0,00651 |
| ENSG00000117152 | RGS4     | -1,513560057 | 0,00653 |
| ENSG00000116459 | ATP5PB   | 0,142539993  | 0,00661 |
| ENSG00000198585 | NUDT16   | 0,280149996  | 0,00662 |
| ENSG00000167522 | ANKRD11  | -0,643450022 | 0,00663 |
| ENSG00000151014 | NOCT     | 1,16821003   | 0,00669 |
| ENSG00000144057 | ST6GAL2  | 3,693959951  | 0,00669 |
| ENSG00000162139 | NEU3     | 0,37026      | 0,00678 |

|                 |          |              |         |
|-----------------|----------|--------------|---------|
| ENSG00000126953 | TIMM8A   | 0,580829978  | 0,00684 |
| ENSG00000156232 | WHAMM    | -0,365379989 | 0,00685 |
| ENSG00000111271 | ACAD10   | -0,222670004 | 0,00689 |
| ENSG00000129038 | LOXL1    | -1,72052002  | 0,0069  |
| ENSG00000277925 | RF00024  | -2,706419945 | 0,00694 |
| ENSG00000182957 | SPATA13  | -1,06329     | 0,00694 |
| ENSG00000154620 | TMSB4Y   | -5,442599773 | 0,00697 |
| ENSG00000179598 | PLD6     | 0,745000005  | 0,00698 |
| ENSG00000167658 | EEF2     | -0,38319999  | 0,00705 |
| ENSG00000204315 | FKBPL    | 0,627260029  | 0,00706 |
| ENSG00000104848 | KCNA7    | -1,962059975 | 0,00706 |
| ENSG00000102606 | ARHGEF7  | -0,674780011 | 0,0072  |
| ENSG00000120327 | PCDHB14  | -1,248029947 | 0,00722 |
| ENSG00000090857 | PDPR     | -0,437180012 | 0,00725 |
| ENSG00000185201 | IFITM2   | -0,360929996 | 0,00725 |
| ENSG00000158669 | GPAT4    | -0,318450004 | 0,00728 |
| ENSG00000169245 | CXCL10   | 2,277440071  | 0,00735 |
| ENSG00000072832 | CRMP1    | -0,723749995 | 0,00738 |
| ENSG00000173258 | ZNF483   | -2,082910061 | 0,00749 |
| ENSG00000163001 | CFAP36   | 0,523909986  | 0,00755 |
| ENSG00000059573 | ALDH18A1 | 0,457780004  | 0,00756 |
| ENSG00000242485 | MRPL20   | 0,223299995  | 0,00756 |
| ENSG00000101413 | RPRD1B   | 0,227750003  | 0,00759 |
| ENSG00000135763 | URB2     | 0,62480998   | 0,00766 |
| ENSG00000167977 | KCTD5    | 0,595529974  | 0,00772 |
| ENSG00000006652 | IFRD1    | -0,839519978 | 0,00774 |
| ENSG00000204227 | RING1    | 0,153200001  | 0,00779 |
| ENSG00000109323 | MANBA    | -0,622229993 | 0,00783 |
| ENSG00000272674 | PCDHB16  | -1,142889977 | 0,00784 |
| ENSG00000168925 | CTRB1    | -3,103179932 | 0,00787 |
| ENSG00000145743 | FBXL17   | -0,816829979 | 0,0079  |
| ENSG00000115539 | PDCL3    | 0,58039999   | 0,00792 |
| ENSG00000189266 | PNRC2    | 0,439529985  | 0,00794 |
| ENSG00000126803 | HSPA2    | -1,404829979 | 0,00801 |
| ENSG00000119669 | IRF2BPL  | -0,547439992 | 0,00803 |
| ENSG00000140937 | CDH11    | 2,61135006   | 0,00803 |
| ENSG00000131969 | ABHD12B  | -0,907289982 | 0,00804 |
| ENSG00000173141 | MRPL57   | -0,556800008 | 0,00804 |
| ENSG00000204304 | PBX2     | 0,746529996  | 0,00808 |
| ENSG00000056558 | TRAF1    | 1,981609941  | 0,00809 |
| ENSG00000078369 | GNB1     | -0,166480005 | 0,00812 |
| ENSG00000037474 | NSUN2    | 0,463420004  | 0,00815 |
| ENSG00000065183 | WDR3     | 0,53087002   | 0,00821 |
| ENSG00000204388 | HSPA1B   | 1,28839004   | 0,00832 |
| ENSG00000162496 | DHRS3    | -1,520519972 | 0,00834 |
| ENSG00000214114 | MYCBP    | 0,51997      | 0,00843 |
| ENSG00000108561 | C1QBP    | 0,690530002  | 0,00847 |

|                 |         |              |         |
|-----------------|---------|--------------|---------|
| ENSG00000114796 | KLHL24  | -0,581809998 | 0,0086  |
| ENSG00000119699 | TGFB3   | -0,641700029 | 0,00861 |
| ENSG0000014919  | COX15   | 0,386909992  | 0,00862 |
| ENSG00000162383 | SLC1A7  | -3,089849949 | 0,00863 |
| ENSG00000132846 | ZBED3   | -0,63628     | 0,00864 |
| ENSG00000126603 | GLIS2   | -0,394169986 | 0,00866 |
| ENSG00000101442 | ACTR5   | 0,555970013  | 0,00873 |
| ENSG00000132026 | RTBDN   | -1,259780049 | 0,00877 |
| ENSG00000135953 | MFSD9   | 0,478729993  | 0,00879 |
| ENSG00000183709 | IFNL2   | 2,7035501    | 0,00879 |
| ENSG00000173889 | PHC3    | -0,304459989 | 0,00881 |
| ENSG00000196378 | ZNF34   | -0,566619992 | 0,00888 |
| ENSG00000070501 | POLB    | 0,400999993  | 0,00898 |
| ENSG00000124217 | MOCS3   | 0,324889988  | 0,00899 |
| ENSG00000083544 | TDRD3   | -0,514230013 | 0,00902 |
| ENSG00000143315 | PIGM    | 0,426349998  | 0,00905 |
| ENSG00000114346 | ECT2    | -0,290459991 | 0,00906 |
| ENSG00000176463 | SLCO3A1 | -1,158630013 | 0,00907 |
| ENSG00000149256 | TENM4   | 2,445169926  | 0,00907 |
| ENSG00000173821 | RNF213  | -1,020429969 | 0,00909 |
| ENSG00000069702 | TGFBR3  | -1,039909959 | 0,00909 |
| ENSG00000148843 | PDCD11  | 0,662429988  | 0,00914 |
| ENSG00000163866 | SMIM12  | 0,261029989  | 0,00917 |
| ENSG00000144677 | CTDSPL  | -0,91516     | 0,00925 |
| ENSG00000139687 | RB1     | -0,388249993 | 0,00934 |
| ENSG00000099797 | TECR    | -0,471929997 | 0,00935 |
| ENSG00000145681 | HAPLN1  | -5,509220123 | 0,00935 |
| ENSG00000126368 | NR1D1   | -1,321859956 | 0,00945 |
| ENSG00000145912 | NHP2    | 0,796570003  | 0,00948 |
| ENSG00000101298 | SNPH    | 1,09434998   | 0,00961 |
| ENSG00000086504 | MRPL28  | 0,494800001  | 0,00961 |
| ENSG00000105851 | PIK3CG  | -2,28625989  | 0,00962 |
| ENSG00000188282 | RUFY4   | -2,827159882 | 0,00969 |
| ENSG00000112619 | PRPH2   | -3,664289951 | 0,00971 |
| ENSG00000137817 | PARP6   | -0,470149994 | 0,00973 |
| ENSG00000165487 | MICU2   | -0,650470018 | 0,0098  |
| ENSG00000109572 | CLCN3   | -0,348340005 | 0,00982 |
| ENSG00000160818 | GPATCH4 | 0,376720011  | 0,00982 |
| ENSG00000204899 | MZT1    | -0,211730003 | 0,01    |
| ENSG00000197540 | GZMM    | -1,80569005  | 0,01004 |
| ENSG00000167526 | RPL13   | -0,382919997 | 0,01007 |
| ENSG00000077264 | PAK3    | 0,531620026  | 0,01015 |
| ENSG00000163793 | DNAJC5G | -3,934870005 | 0,01023 |
| ENSG00000204977 | TRIM13  | -0,335590005 | 0,01025 |
| ENSG00000167721 | TSR1    | 0,220029995  | 0,01026 |
| ENSG00000149043 | SYT8    | -3,100110054 | 0,01029 |
| ENSG00000070495 | JMJD6   | 0,363799989  | 0,01033 |

|                 |          |              |         |
|-----------------|----------|--------------|---------|
| ENSG0000077935  | SMC1B    | 1,372730017  | 0,01034 |
| ENSG00000115993 | TRAK2    | -0,294719994 | 0,01038 |
| ENSG00000112763 | BTN2A1   | 0,430379987  | 0,01038 |
| ENSG00000040633 | PHF23    | 0,297600001  | 0,0104  |
| ENSG00000119314 | PTBP3    | -0,605300009 | 0,01045 |
| ENSG00000092978 | GPATCH2  | 0,335530013  | 0,01045 |
| ENSG00000166159 | LRTM2    | 2,977469921  | 0,01047 |
| ENSG00000179023 | KLHDC7A  | -1,852839947 | 0,01053 |
| ENSG00000074582 | BCS1L    | 0,620459974  | 0,01055 |
| ENSG00000065361 | ERBB3    | -0,55539     | 0,01056 |
| ENSG00000214022 | REPIN1   | -0,36443001  | 0,01057 |
| ENSG00000156030 | ELMSAN1  | -0,461930007 | 0,01061 |
| ENSG00000141738 | GRB7     | -1,090950012 | 0,01063 |
| ENSG00000204560 | DHX16    | 0,404390007  | 0,01063 |
| ENSG00000196177 | ACADSB   | 0,943939984  | 0,01063 |
| ENSG00000062370 | ZNF112   | -0,581849992 | 0,01066 |
| ENSG00000203697 | CAPN8    | -1,797039986 | 0,01068 |
| ENSG00000108669 | CYTH1    | -0,302249998 | 0,01069 |
| ENSG00000162981 | FAM84A   | 4,363729954  | 0,01072 |
| ENSG00000136153 | LMO7     | -1,613170028 | 0,01076 |
| ENSG00000169248 | CXCL11   | 2,689680099  | 0,01077 |
| ENSG00000163492 | CCDC141  | 2,323199987  | 0,0108  |
| ENSG00000253958 | CLDN23   | -1,893769979 | 0,01082 |
| ENSG00000171747 | LGALS4   | 2,484100103  | 0,01083 |
| ENSG00000175874 | CREG2    | -1,534950018 | 0,01089 |
| ENSG00000126218 | F10      | -1,828959942 | 0,01099 |
| ENSG00000130706 | ADRM1    | 0,444480002  | 0,01099 |
| ENSG00000125657 | TNFSF9   | -0,814700007 | 0,01102 |
| ENSG00000042781 | USH2A    | 1,225200057  | 0,01105 |
| ENSG00000121390 | PSPC1    | -0,37568     | 0,01108 |
| ENSG00000175938 | ORAI3    | -0,779229999 | 0,01112 |
| ENSG00000129534 | MIS18BP1 | -0,490159988 | 0,01112 |
| ENSG00000173548 | SNX33    | -0,914969981 | 0,01115 |
| ENSG00000095321 | CRAT     | -0,460130006 | 0,01118 |
| ENSG00000141579 | ZNF750   | -2,523030043 | 0,01122 |
| ENSG00000141759 | TXNL4A   | 0,346839994  | 0,01126 |
| ENSG00000213931 | HBE1     | 2,819999933  | 0,01132 |
| ENSG00000240053 | LY6G5B   | 0,672860026  | 0,01136 |
| ENSG00000122965 | RBM19    | 0,45499      | 0,01137 |
| ENSG00000150459 | SAP18    | -0,413379997 | 0,01147 |
| ENSG00000177666 | PNPLA2   | 0,348269999  | 0,01149 |
| ENSG00000144820 | ADGRG7   | 2,040479898  | 0,01158 |
| ENSG00000135686 | KLHL36   | -0,416079998 | 0,01159 |
| ENSG00000207864 | MIR27B   | -3,024009943 | 0,01174 |
| ENSG00000164287 | CDC20B   | -1,592550039 | 0,01174 |
| ENSG00000172845 | SP3      | -0,259149998 | 0,01182 |
| ENSG00000108602 | ALDH3A1  | -1,746559978 | 0,01185 |

|                 |          |              |         |
|-----------------|----------|--------------|---------|
| ENSG00000165171 | METTL27  | -0,878239989 | 0,01192 |
| ENSG00000124120 | TTPAL    | 0,44916001   | 0,01194 |
| ENSG00000144837 | PLA1A    | -2,777299881 | 0,01203 |
| ENSG00000204642 | HLA-F    | 0,557210028  | 0,01204 |
| ENSG00000156958 | GALK2    | -0,339899987 | 0,01214 |
| ENSG00000165480 | SKA3     | -0,614220023 | 0,01223 |
| ENSG00000218336 | TENM3    | -0,562720001 | 0,01226 |
| ENSG00000159200 | RCAN1    | 1,571539998  | 0,01227 |
| ENSG00000144134 | RABL2A   | 0,572139978  | 0,01232 |
| ENSG00000136450 | SRSF1    | 0,553449988  | 0,01243 |
| ENSG00000101158 | NELFCD   | 0,280079991  | 0,01244 |
| ENSG00000120616 | EPC1     | -0,46371001  | 0,01244 |
| ENSG00000164056 | SPRY1    | -0,415670007 | 0,01246 |
| ENSG00000180822 | PSMG4    | 0,267890006  | 0,01252 |
| ENSG00000081386 | ZNF510   | -0,635940015 | 0,01253 |
| ENSG00000102048 | ASB9     | -1,308910012 | 0,01263 |
| ENSG00000089101 | CFAP61   | -1,819429994 | 0,01264 |
| ENSG00000157423 | HYDIN    | 1,824339986  | 0,01265 |
| ENSG00000214814 | FER1L6   | 2,854850054  | 0,01268 |
| ENSG00000047648 | ARHGAP6  | 4,098259926  | 0,01279 |
| ENSG00000204590 | GNL1     | 0,390740007  | 0,01283 |
| ENSG00000167889 | MGAT5B   | -0,890290022 | 0,01291 |
| ENSG00000030110 | BAK1     | 0,469599992  | 0,01292 |
| ENSG00000102678 | FGF9     | -1,771160007 | 0,01293 |
| ENSG00000101945 | SUV39H1  | -0,416409999 | 0,013   |
| ENSG00000197506 | SLC28A3  | 3,105890036  | 0,01308 |
| ENSG00000107938 | EDRF1    | 0,410380006  | 0,01319 |
| ENSG00000124532 | MRS2     | 0,463129997  | 0,01319 |
| ENSG00000183542 | KLRC4    | -1,145210028 | 0,0132  |
| ENSG00000105750 | ZNF85    | -2,02312994  | 0,01329 |
| ENSG00000075303 | SLC25A40 | -0,637740016 | 0,01332 |
| ENSG00000132286 | TIMM10B  | 0,416530013  | 0,01336 |
| ENSG00000137845 | ADAM10   | -0,591310024 | 0,0134  |
| ENSG00000148120 | C9orf3   | -1,047430038 | 0,01349 |
| ENSG00000140545 | MFGE8    | -0,415980011 | 0,01354 |
| ENSG00000170525 | PFKFB3   | -0,359899998 | 0,01368 |
| ENSG00000113384 | GOLPH3   | -0,440780014 | 0,01376 |
| ENSG00000186104 | CYP2R1   | -0,264230013 | 0,01379 |
| ENSG00000159399 | HK2      | 0,675320029  | 0,01383 |
| ENSG00000120805 | ARL1     | 0,296409994  | 0,01384 |
| ENSG00000183605 | SFXN4    | 0,459980011  | 0,01387 |
| ENSG00000197093 | GAL3ST4  | -1,061490059 | 0,01401 |
| ENSG00000031823 | RANBP3   | -0,241390005 | 0,01405 |
| ENSG00000177469 | CAVIN1   | -1,957829952 | 0,01409 |
| ENSG00000108021 | FAM208B  | 0,543640018  | 0,0141  |
| ENSG00000143319 | ISG20L2  | 0,385439992  | 0,01414 |
| ENSG00000150768 | DLAT     | 0,52877003   | 0,01415 |

|                 |          |              |         |
|-----------------|----------|--------------|---------|
| ENSG00000229474 | PATL2    | -1,089589953 | 0,01415 |
| ENSG00000141338 | ABCA8    | 1,463739991  | 0,01418 |
| ENSG00000183597 | TANGO2   | 0,375770003  | 0,0142  |
| ENSG00000114956 | DGUOK    | 0,270099998  | 0,01427 |
| ENSG00000186300 | ZNF555   | -0,498970002 | 0,01436 |
| ENSG00000165030 | NFIL3    | -0,601930022 | 0,01439 |
| ENSG00000169057 | MECP2    | -0,312970012 | 0,01443 |
| ENSG00000233927 | RPS28    | -0,317820013 | 0,01453 |
| ENSG00000105711 | SCN1B    | -1,239760041 | 0,01458 |
| ENSG00000132429 | POPDC3   | 0,298990011  | 0,01461 |
| ENSG00000088726 | TMEM40   | 2,016609907  | 0,01475 |
| ENSG00000117411 | B4GALT2  | 0,446610004  | 0,01476 |
| ENSG00000163285 | GABRG1   | -5,057219982 | 0,01488 |
| ENSG00000132471 | WBP2     | -0,396429986 | 0,01494 |
| ENSG00000091622 | PITPNM3  | -1,359979987 | 0,015   |
| ENSG00000138385 | SSB      | 0,543749988  | 0,015   |
| ENSG00000116752 | BCAS2    | 0,267470002  | 0,01501 |
| ENSG00000105185 | PDCD5    | 0,413430005  | 0,01501 |
| ENSG00000158169 | FANCC    | -0,39932999  | 0,01502 |
| ENSG00000167083 | GNGT2    | 3,413350105  | 0,01503 |
| ENSG00000163818 | LZTFL1   | 0,478080004  | 0,01507 |
| ENSG00000272047 | GTF2H5   | 0,533710003  | 0,01508 |
| ENSG00000197632 | SERPINB2 | 3,534960032  | 0,01517 |
| ENSG00000188177 | ZC3H6    | -0,931200027 | 0,01529 |
| ENSG00000101333 | PLCB4    | -0,878009975 | 0,01532 |
| ENSG00000172794 | RAB37    | -2,132080078 | 0,01545 |
| ENSG00000105137 | SYDE1    | -0,338530004 | 0,01553 |
| ENSG00000083223 | TUT7     | -0,302109987 | 0,01556 |
| ENSG00000187742 | SECISBP2 | -0,479099989 | 0,01564 |
| ENSG00000108684 | ASIC2    | -3,519309998 | 0,0157  |
| ENSG00000065559 | MAP2K4   | 0,20927      | 0,01575 |
| ENSG00000108443 | RPS6KB1  | -0,340130001 | 0,01577 |
| ENSG00000244005 | NFS1     | 0,441080004  | 0,01577 |
| ENSG00000187630 | DHRS4L2  | -0,731159985 | 0,01583 |
| ENSG00000177728 | TMEM94   | -0,319869995 | 0,01584 |
| ENSG00000114480 | GBE1     | -0,903050005 | 0,01586 |
| ENSG00000184640 | SEPT9    | -0,818560004 | 0,01592 |
| ENSG00000135829 | DHX9     | 0,215179995  | 0,01597 |
| ENSG00000196196 | HRCT1    | -1,892930031 | 0,01621 |
| ENSG00000035499 | DEPDC1B  | -0,692019999 | 0,01624 |
| ENSG00000136161 | RCBTB2   | -0,823390007 | 0,01625 |
| ENSG00000126785 | RHOJ     | -2,228430033 | 0,01631 |
| ENSG00000030419 | IKZF2    | -0,580049992 | 0,01632 |
| ENSG00000143179 | UCK2     | 0,328040004  | 0,01632 |
| ENSG00000126016 | AMOT     | -1,174679995 | 0,01641 |
| ENSG00000101347 | SAMHD1   | 0,304910004  | 0,01647 |
| ENSG00000037897 | METTL1   | 0,603850007  | 0,01648 |

|                 |          |              |         |
|-----------------|----------|--------------|---------|
| ENSG00000140718 | FTO      | -0,431199998 | 0,01648 |
| ENSG00000275359 | RF02179  | -1,65436995  | 0,01652 |
| ENSG00000107018 | RLN1     | 0,943090022  | 0,01659 |
| ENSG00000114988 | LMAN2L   | 0,25830999   | 0,01661 |
| ENSG00000069943 | PIGB     | -0,787779987 | 0,01665 |
| ENSG00000184254 | ALDH1A3  | -2,298039913 | 0,01669 |
| ENSG00000163932 | PRKCD    | 0,42719999   | 0,01674 |
| ENSG00000109674 | NEIL3    | -0,574129999 | 0,0168  |
| ENSG00000135940 | COX5B    | 0,317719996  | 0,01692 |
| ENSG00000148090 | AUH      | -0,349730015 | 0,01709 |
| ENSG00000115875 | SRSF7    | 0,452969998  | 0,0171  |
| ENSG00000071127 | WDR1     | 0,42535001   | 0,01723 |
| ENSG00000059145 | UNKL     | 0,718079984  | 0,01726 |
| ENSG00000164465 | DCBLD1   | -0,633249998 | 0,01728 |
| ENSG00000172379 | ARNT2    | -0,806500018 | 0,01735 |
| ENSG00000232434 | AJM1     | -0,727779984 | 0,01758 |
| ENSG00000177192 | PUS1     | 0,5528       | 0,01773 |
| ENSG00000100220 | RTCB     | 0,401769996  | 0,01778 |
| ENSG00000099998 | GGT5     | -2,509249926 | 0,01783 |
| ENSG00000187607 | ZNF286A  | 0,414829999  | 0,01784 |
| ENSG00000127483 | HP1BP3   | -0,206489995 | 0,01787 |
| ENSG00000145365 | TIFA     | -0,329849988 | 0,01788 |
| ENSG00000186480 | INSIG1   | -1,109099984 | 0,01788 |
| ENSG00000136108 | CKAP2    | -0,604690015 | 0,01792 |
| ENSG00000100802 | C14orf93 | -0,603900015 | 0,01805 |
| ENSG00000168781 | PPIP5K1  | -0,530439973 | 0,01806 |
| ENSG00000104112 | SCG3     | -2,118920088 | 0,01807 |
| ENSG00000055070 | SZRD1    | -0,168559998 | 0,01845 |
| ENSG00000129197 | RPAIN    | 0,496670008  | 0,01855 |
| ENSG00000169504 | CLIC4    | -0,278210014 | 0,0186  |
| ENSG00000006025 | OSBPL7   | -0,659349978 | 0,01862 |
| ENSG00000113739 | STC2     | -1,844810009 | 0,01866 |
| ENSG00000119943 | PYROXD2  | -0,883019984 | 0,01886 |
| ENSG00000139354 | GAS2L3   | -0,60402     | 0,01888 |
| ENSG00000123091 | RNF11    | 0,220880002  | 0,01893 |
| ENSG00000254087 | LYN      | 0,311589986  | 0,01895 |
| ENSG00000117115 | PADI2    | -1,30163002  | 0,01908 |
| ENSG00000111341 | MGP      | -2,140269995 | 0,01914 |
| ENSG00000139517 | LNK2     | -0,437959999 | 0,0192  |
| ENSG00000134262 | AP4B1    | 0,310669988  | 0,01922 |
| ENSG00000153187 | HNRNPU   | 0,284969985  | 0,01928 |
| ENSG00000139734 | DIAPH3   | -0,659550011 | 0,01933 |
| ENSG00000097046 | CDC7     | -0,636910021 | 0,01938 |
| ENSG00000197256 | KANK2    | -0,525510013 | 0,01945 |
| ENSG00000114378 | HYAL1    | -0,909870028 | 0,01954 |
| ENSG00000167680 | SEMA6B   | -1,290369987 | 0,01957 |
| ENSG00000115977 | AAK1     | -0,18592     | 0,01957 |

|                 |          |              |         |
|-----------------|----------|--------------|---------|
| ENSG00000103507 | BCKDK    | 0,374949992  | 0,01962 |
| ENSG00000082438 | COBLL1   | 0,514370024  | 0,01963 |
| ENSG00000134899 | ERCC5    | -0,822040021 | 0,01971 |
| ENSG00000132622 | HSPA12B  | 1,020370007  | 0,01974 |
| ENSG00000115368 | WDR75    | 0,397000015  | 0,01978 |
| ENSG00000130943 | PKDREJ   | -1,649680018 | 0,0198  |
| ENSG00000171130 | ATP6VOE2 | 0,325269997  | 0,01991 |
| ENSG00000100982 | PCIF1    | -0,481489986 | 0,01999 |
| ENSG00000198736 | MSRB1    | 0,650030017  | 0,02008 |
| ENSG00000143387 | CTSK     | -0,971159995 | 0,02024 |
| ENSG00000077984 | CST7     | 2,201329947  | 0,02028 |
| ENSG00000150201 | FXVD4    | 4,824339867  | 0,02034 |
| ENSG00000115364 | MRPL19   | 0,264829993  | 0,02037 |
| ENSG00000106624 | AEBP1    | -1,243199944 | 0,02037 |
| ENSG00000164024 | METAP1   | -0,221959993 | 0,02038 |
| ENSG00000091482 | SMPX     | -1,798239946 | 0,02043 |
| ENSG00000105856 | HBP1     | -0,443679988 | 0,02047 |
| ENSG00000168056 | LTBP3    | -0,607249975 | 0,02048 |
| ENSG00000182700 | IGIP     | -0,699519992 | 0,02082 |
| ENSG00000178814 | OPLAH    | -0,876460016 | 0,02082 |
| ENSG00000043143 | JADE2    | -1,186259985 | 0,02086 |
| ENSG00000041353 | RAB27B   | -1,544370055 | 0,02087 |
| ENSG00000105486 | LIG1     | -0,366490006 | 0,02089 |
| ENSG00000249156 | TAF11L12 | -4,450679779 | 0,02103 |
| ENSG00000183671 | GPR1     | -0,875230014 | 0,02106 |
| ENSG00000168079 | SCARA5   | -2,336380005 | 0,02109 |
| ENSG00000183185 | GABRR3   | 4,242410183  | 0,02111 |
| ENSG00000174684 | B4GAT1   | 0,700179994  | 0,02122 |
| ENSG00000134815 | DHX34    | 0,649980009  | 0,02127 |
| ENSG00000090975 | PITPNM2  | -0,332489997 | 0,02128 |
| ENSG00000145439 | CBR4     | -0,487399995 | 0,02132 |
| ENSG00000171033 | PKIA     | 0,851540029  | 0,02137 |
| ENSG00000160710 | ADAR     | -0,158340007 | 0,02139 |
| ENSG00000109107 | ALDOC    | -1,005800009 | 0,02147 |
| ENSG00000243566 | UPK3B    | -2,548909903 | 0,02148 |
| ENSG00000134461 | ANKRD16  | 0,681469977  | 0,02153 |
| ENSG00000116095 | PLEKHA3  | 0,450760007  | 0,02154 |
| ENSG00000106327 | TFR2     | -4,06633997  | 0,02164 |
| ENSG00000121766 | ZCCHC17  | 0,295610011  | 0,02164 |
| ENSG00000214309 | MBLAC1   | -0,638339996 | 0,02176 |
| ENSG00000153933 | DGKE     | 0,516340017  | 0,02183 |
| ENSG00000161714 | PLCD3    | -0,710389972 | 0,02184 |
| ENSG00000106128 | GHRHR    | -2,492160082 | 0,02188 |
| ENSG00000168374 | ARF4     | 0,532570004  | 0,02189 |
| ENSG00000109832 | DDX25    | -2,31998992  | 0,02192 |
| ENSG00000099940 | SNAP29   | 0,341410011  | 0,02208 |
| ENSG00000128050 | PAICS    | 0,444290012  | 0,02229 |



|                 |            |              |         |
|-----------------|------------|--------------|---------|
| ENSG0000087085  | ACHE       | -2,136039972 | 0,02233 |
| ENSG00000138166 | DUSP5      | 1,299870014  | 0,02234 |
| ENSG00000157168 | NRG1       | 2,268779993  | 0,02243 |
| ENSG00000180891 | CUEDC1     | -0,764110029 | 0,02245 |
| ENSG00000204389 | HSPA1A     | 1,130049944  | 0,02248 |
| ENSG00000143199 | ADCY10     | -1,636590004 | 0,02273 |
| ENSG00000214534 | ZNF705E    | -1,458279967 | 0,02293 |
| ENSG00000171243 | SOSTDC1    | -1,270740032 | 0,02296 |
| ENSG00000130402 | ACTN4      | -0,645799994 | 0,02301 |
| ENSG00000158246 | TENT5B     | -1,174880028 | 0,02303 |
| ENSG00000124193 | SRSF6      | 0,480120003  | 0,02314 |
| ENSG00000145386 | CCNA2      | -0,429369986 | 0,02317 |
| ENSG00000067182 | TNFRSF1A   | -0,967320025 | 0,02317 |
| ENSG00000048828 | FAM120A    | -0,401719987 | 0,0233  |
| ENSG00000111339 | ART4       | -2,857219934 | 0,02334 |
| ENSG00000204310 | AGPAT1     | 0,35887      | 0,02337 |
| ENSG00000134900 | TPP2       | -0,407409996 | 0,02339 |
| ENSG00000005486 | RHBDD2     | -0,491959989 | 0,02341 |
| ENSG00000165606 | DRGX       | -3,304970026 | 0,0235  |
| ENSG00000101452 | DHX35      | 0,214200005  | 0,02353 |
| ENSG00000169964 | TMEM42     | -0,373389989 | 0,02359 |
| ENSG00000156931 | VPS8       | -0,337309986 | 0,02364 |
| ENSG00000177098 | SCN4B      | -2,438440084 | 0,02367 |
| ENSG00000132702 | HAPLN2     | -2,290980101 | 0,02369 |
| ENSG00000162390 | ACOT11     | -0,625100017 | 0,02369 |
| ENSG00000124491 | F13A1      | -3,633349895 | 0,0237  |
| ENSG00000147570 | DNAJC5B    | -2,603739977 | 0,02377 |
| ENSG00000108439 | PNPO       | 0,388249993  | 0,02388 |
| ENSG00000111845 | PAK1IP1    | 0,480890006  | 0,02405 |
| ENSG00000174718 | KIAA1551   | -0,642910004 | 0,02405 |
| ENSG00000164853 | UNCX       | -3,784660101 | 0,02406 |
| ENSG00000198673 | FAM19A2    | -1,534459949 | 0,02417 |
| ENSG00000132768 | DPH2       | 0,511420012  | 0,02425 |
| ENSG00000050730 | TNIP3      | 2,696840048  | 0,02429 |
| ENSG00000186648 | CARMIL3    | -1,893610001 | 0,02429 |
| ENSG00000131507 | NDFIP1     | -0,189940006 | 0,02448 |
| ENSG00000168453 | HR         | -1,688140035 | 0,0245  |
| ENSG00000163568 | AIM2       | 2,861789942  | 0,0246  |
| ENSG00000173320 | STOX2      | -0,926989973 | 0,02464 |
| ENSG00000198369 | SPRED2     | -0,39616999  | 0,02468 |
| ENSG00000275464 | FP565260.1 | 0,665130019  | 0,0248  |
| ENSG00000241878 | PISD       | 0,336939991  | 0,02482 |
| ENSG00000053254 | FOXN3      | -0,574280024 | 0,02489 |
| ENSG00000235631 | RNF148     | -1,640159965 | 0,02493 |
| ENSG00000107902 | LHPP       | -0,472829998 | 0,02495 |
| ENSG00000166788 | SAAL1      | 0,30171001   | 0,02509 |
| ENSG00000024422 | EHD2       | -1,514369965 | 0,02511 |

|                 |           |              |         |
|-----------------|-----------|--------------|---------|
| ENSG00000168275 | COA6      | 0,357039988  | 0,02521 |
| ENSG00000196172 | ZNF681    | -1,10540998  | 0,02521 |
| ENSG00000174173 | TRMT10C   | 0,238319993  | 0,02526 |
| ENSG00000120071 | KANSL1    | -0,170149997 | 0,02533 |
| ENSG00000030066 | NUP160    | 0,26947999   | 0,02542 |
| ENSG00000196604 | POTEF     | -3,276799917 | 0,02548 |
| ENSG00000133030 | MPRIIP    | -0,583090007 | 0,0256  |
| ENSG00000143793 | C1orf35   | 0,287959993  | 0,0256  |
| ENSG00000156097 | GPR61     | -1,691169977 | 0,02566 |
| ENSG00000130255 | RPL36     | -0,258230001 | 0,02566 |
| ENSG00000155918 | RAET1L    | 2,363630056  | 0,02571 |
| ENSG00000277224 | HIST1H2BF | -1,485530019 | 0,02598 |
| ENSG00000142945 | KIF2C     | -0,358139992 | 0,02598 |
| ENSG00000113070 | HBEGF     | 1,585299969  | 0,02616 |
| ENSG00000196535 | MYO18A    | -0,581920028 | 0,02624 |
| ENSG00000196361 | ELAVL3    | -2,406949997 | 0,02626 |
| ENSG00000152767 | FARP1     | -0,452639997 | 0,02629 |
| ENSG00000011638 | TMEM159   | 0,544120014  | 0,02633 |
| ENSG00000111786 | SRSF9     | 0,13752      | 0,02643 |
| ENSG00000120328 | PCDHB12   | -0,568639994 | 0,02644 |
| ENSG00000164338 | UTP15     | 0,41771999   | 0,02644 |
| ENSG00000185561 | TLCD2     | 0,409469992  | 0,0265  |
| ENSG00000156697 | UTP14A    | 0,289389998  | 0,02652 |
| ENSG00000104231 | ZFAND1    | -0,466639996 | 0,02652 |
| ENSG00000178776 | C5orf46   | -3,448909998 | 0,02662 |
| ENSG00000139155 | SLCO1C1   | -2,419559956 | 0,02666 |
| ENSG00000119655 | NPC2      | -1,291120052 | 0,02685 |
| ENSG00000082516 | GEMIN5    | 0,414629996  | 0,02699 |
| ENSG00000101187 | SLCO4A1   | 1,154639959  | 0,0271  |
| ENSG00000162892 | IL24      | 3,337150097  | 0,02712 |
| ENSG00000183309 | ZNF623    | -0,333400011 | 0,02723 |
| ENSG00000198551 | ZNF627    | -0,611810029 | 0,02728 |
| ENSG00000074071 | MRPS34    | 0,438210011  | 0,02734 |
| ENSG00000160789 | LMNA      | -1,215440035 | 0,02741 |
| ENSG00000220205 | VAMP2     | 0,387989998  | 0,02757 |
| ENSG00000159231 | CBR3      | -1,164389968 | 0,02758 |
| ENSG00000095752 | IL11      | 2,065860033  | 0,02759 |
| ENSG00000172086 | KRCC1     | -1,168740034 | 0,02769 |
| ENSG00000115758 | ODC1      | 0,641640007  | 0,02771 |
| ENSG00000052749 | RRP12     | 0,63586998   | 0,02776 |
| ENSG00000120217 | CD274     | 2,273200035  | 0,02779 |
| ENSG00000104946 | TBC1D17   | -0,728590012 | 0,02794 |
| ENSG00000114383 | TUSC2     | 0,373549998  | 0,02807 |
| ENSG00000132749 | TESMIN    | -0,734009981 | 0,02808 |
| ENSG00000111012 | CYP27B1   | 0,76868999   | 0,02811 |
| ENSG00000159267 | HLCS      | -0,401149988 | 0,02817 |
| ENSG00000172602 | RND1      | 1,504840016  | 0,02821 |

|                 |           |              |         |
|-----------------|-----------|--------------|---------|
| ENSG00000133067 | LGR6      | -2,361829996 | 0,02834 |
| ENSG00000100526 | CDKN3     | -0,88428998  | 0,02834 |
| ENSG00000077684 | JADE1     | -0,434610009 | 0,02838 |
| ENSG00000104643 | MTMR9     | 0,462049991  | 0,02838 |
| ENSG00000198142 | SOWAHC    | 1,04065001   | 0,02851 |
| ENSG00000179855 | GIPC3     | -3,374480009 | 0,02857 |
| ENSG00000112096 | SOD2      | 1,064970016  | 0,02863 |
| ENSG00000106333 | PCOLCE    | -0,716799974 | 0,0288  |
| ENSG00000064655 | EYA2      | 2,021379948  | 0,02886 |
| ENSG00000213398 | LCAT      | -0,600449979 | 0,02923 |
| ENSG00000047579 | DTNBP1    | 0,475560009  | 0,02933 |
| ENSG00000100216 | TOMM22    | 0,474220008  | 0,02935 |
| ENSG00000180596 | HIST1H2BC | -1,50917995  | 0,02939 |
| ENSG00000204394 | VAR5      | 0,363499999  | 0,02945 |
| ENSG00000167107 | ACSF2     | -0,373679996 | 0,02948 |
| ENSG00000042832 | TG        | -2,157360077 | 0,02951 |
| ENSG00000027869 | SH2D2A    | 1,667240024  | 0,02952 |
| ENSG00000137871 | ZNF280D   | -0,569450021 | 0,02955 |
| ENSG00000102312 | PORCN     | -1,561349988 | 0,02957 |
| ENSG00000131944 | FAAP24    | 0,659269989  | 0,02975 |
| ENSG00000107937 | GTPBP4    | 0,535170019  | 0,02978 |
| ENSG00000242550 | SERPINB10 | 3,490950108  | 0,0299  |
| ENSG00000112852 | PCDHB2    | -0,81674999  | 0,02996 |
| ENSG00000169282 | KCNAB1    | 0,915880024  | 0,02996 |
| ENSG00000019144 | PHLDB1    | -0,821630001 | 0,03    |
| ENSG00000138073 | PREB      | 0,505010009  | 0,03008 |
| ENSG00000164972 | C9orf24   | -1,969920039 | 0,03018 |
| ENSG00000171992 | SYNPO     | -1,401790023 | 0,03018 |
| ENSG00000088205 | DDX18     | 0,528689981  | 0,03021 |
| ENSG00000165233 | CARD19    | -0,487720013 | 0,03026 |
| ENSG00000162545 | CAMK2N1   | -0,801039994 | 0,03029 |
| ENSG00000120337 | TNFSF18   | 2,956029892  | 0,03029 |
| ENSG00000125977 | EIF2S2    | 0,310889989  | 0,03058 |
| ENSG00000159720 | ATP6VOD1  | -0,291570008 | 0,03065 |
| ENSG00000144015 | TRIM43    | -4,461259842 | 0,03066 |
| ENSG00000089234 | BRAP      | 0,299180001  | 0,03074 |
| ENSG00000172046 | USP19     | 0,408690006  | 0,03074 |
| ENSG00000141698 | NT5C3B    | 0,496890008  | 0,03085 |
| ENSG00000179914 | ITLN1     | 3,144829988  | 0,03091 |
| ENSG00000206073 | SERPINB4  | 3,823559999  | 0,03094 |
| ENSG00000172939 | OXSR1     | 0,242740005  | 0,03096 |
| ENSG00000185862 | EVI2B     | -1,689939976 | 0,03097 |
| ENSG00000143256 | PFDN2     | 0,672119975  | 0,03098 |
| ENSG0000010310  | GIPR      | -0,63598001  | 0,03105 |
| ENSG00000149428 | HYOU1     | 0,722199976  | 0,03107 |
| ENSG00000112984 | KIF20A    | -0,820819974 | 0,03107 |
| ENSG00000200090 | RF00019   | -0,976830006 | 0,03108 |

|                 |           |              |         |
|-----------------|-----------|--------------|---------|
| ENSG00000135521 | LTV1      | 0,693530023  | 0,03111 |
| ENSG00000153487 | ING1      | -0,504299998 | 0,03126 |
| ENSG00000083168 | KAT6A     | -0,185990006 | 0,03126 |
| ENSG00000096717 | SIRT1     | 0,386220008  | 0,03133 |
| ENSG00000172270 | BSG       | -0,272179991 | 0,03134 |
| ENSG00000131043 | AAR2      | 0,354189992  | 0,03162 |
| ENSG00000148218 | ALAD      | -0,452980012 | 0,03167 |
| ENSG00000196505 | GDAP2     | 0,428039998  | 0,03167 |
| ENSG00000120659 | TNFSF11   | -5,147260189 | 0,03168 |
| ENSG00000196975 | ANXA4     | -0,680909991 | 0,03169 |
| ENSG00000181588 | MEX3D     | -0,344040006 | 0,03174 |
| ENSG00000197140 | ADAM32    | -1,396989942 | 0,03183 |
| ENSG00000258597 | SERPINA2  | 2,659549952  | 0,03185 |
| ENSG00000273749 | CYFIP1    | -0,45006001  | 0,03189 |
| ENSG00000118308 | LRMP      | -1,842380047 | 0,0319  |
| ENSG00000066279 | ASPM      | -0,690699995 | 0,03193 |
| ENSG00000102001 | CACNA1F   | 2,057039976  | 0,03194 |
| ENSG00000180611 | MB21D2    | 0,898100019  | 0,03199 |
| ENSG00000171522 | PTGER4    | 1,770329952  | 0,03206 |
| ENSG00000177990 | DPY19L2   | -1,795709968 | 0,03212 |
| ENSG00000065057 | NTHL1     | 0,710280001  | 0,03218 |
| ENSG00000152253 | SPC25     | -0,23116     | 0,03223 |
| ENSG00000132405 | TBC1D14   | 0,365940005  | 0,03236 |
| ENSG00000166226 | CCT2      | 0,414059997  | 0,03241 |
| ENSG00000107829 | FBXW4     | -0,593970001 | 0,03254 |
| ENSG00000149657 | LSM14B    | 0,332740009  | 0,03259 |
| ENSG00000162782 | TDRD5     | 2,157769918  | 0,0326  |
| ENSG00000164574 | GALNT10   | -0,705619991 | 0,03264 |
| ENSG00000090520 | DNAJB11   | 0,341529995  | 0,03294 |
| ENSG00000006007 | GDE1      | 0,126750007  | 0,03299 |
| ENSG00000163956 | LRPAP1    | 0,435360014  | 0,03301 |
| ENSG00000095383 | TBC1D2    | -1,282520056 | 0,0331  |
| ENSG00000179284 | DAND5     | -1,161239982 | 0,03312 |
| ENSG00000188306 | LRRIQ4    | -2,055389881 | 0,03324 |
| ENSG00000139637 | C12orf10  | 0,313329995  | 0,0333  |
| ENSG00000120215 | MLANA     | -1,440510035 | 0,0334  |
| ENSG00000166816 | LDHD      | -1,217929959 | 0,03345 |
| ENSG00000141485 | SLC13A5   | -1,441840053 | 0,03346 |
| ENSG00000160752 | FDPS      | -0,769219995 | 0,0335  |
| ENSG00000219607 | PPP1R3G   | -1,319560051 | 0,03357 |
| ENSG00000151715 | TMEM45B   | 2,167540073  | 0,03358 |
| ENSG00000011426 | ANLN      | -1,063079953 | 0,03362 |
| ENSG00000142687 | KIAA0319L | -0,372889996 | 0,03363 |
| ENSG00000160131 | VMA21     | 0,215609998  | 0,03378 |
| ENSG00000171219 | CDC42BPG  | -1,280979991 | 0,03392 |
| ENSG00000146678 | IGFBP1    | 1,923699975  | 0,03398 |
| ENSG00000176715 | ACSF3     | -0,391680002 | 0,03402 |

|                 |             |              |         |
|-----------------|-------------|--------------|---------|
| ENSG0000082482  | KCNK2       | 2,48526001   | 0,03405 |
| ENSG00000165197 | VEGFD       | -2,450510025 | 0,03407 |
| ENSG00000115163 | CENPA       | -0,351170003 | 0,0341  |
| ENSG00000162522 | KIAA1522    | -0,648930013 | 0,03426 |
| ENSG00000173267 | SNCG        | -0,895370007 | 0,03432 |
| ENSG00000224531 | SMIM13      | 0,392780006  | 0,03441 |
| ENSG00000125962 | ARMCX5      | 0,399960011  | 0,03445 |
| ENSG00000164266 | SPINK1      | -2,004369974 | 0,03457 |
| ENSG00000121957 | GPSM2       | -0,443500012 | 0,0346  |
| ENSG00000160087 | UBE2J2      | 0,206190005  | 0,0347  |
| ENSG00000175130 | MARCKSL1    | 0,837979972  | 0,03476 |
| ENSG00000178055 | PRSS42      | -2,533639908 | 0,03481 |
| ENSG00000074211 | PPP2R2C     | 1,710389972  | 0,03485 |
| ENSG00000175216 | CKAP5       | -0,159789994 | 0,03491 |
| ENSG00000102572 | STK24       | -0,394410014 | 0,03503 |
| ENSG00000139350 | NEDD1       | 0,380219996  | 0,03505 |
| ENSG00000172375 | C2CD2L      | 0,566410005  | 0,03507 |
| ENSG00000167525 | PROCA1      | -0,58434999  | 0,03508 |
| ENSG00000204335 | SP5         | -1,544929981 | 0,03519 |
| ENSG00000116254 | CHD5        | -1,805799961 | 0,03519 |
| ENSG00000141569 | TRIM65      | -0,535030007 | 0,0352  |
| ENSG00000105640 | RPL18A      | -0,261830002 | 0,03523 |
| ENSG00000131620 | ANO1        | -2,217190027 | 0,03532 |
| ENSG00000123505 | AMD1        | 0,468329996  | 0,03537 |
| ENSG00000106948 | AKNA        | -0,840640008 | 0,0354  |
| ENSG00000205809 | KLRC2       | -1,125650048 | 0,03545 |
| ENSG00000204568 | MRPS18B     | 0,249219999  | 0,03548 |
| ENSG00000155100 | OTUD6B      | 0,415470004  | 0,03548 |
| ENSG00000162735 | PEX19       | 0,297060013  | 0,03549 |
| ENSG00000151552 | QDPR        | 0,385129988  | 0,03551 |
| ENSG00000207563 | MIR23B      | -2,774120092 | 0,03552 |
| ENSG00000153253 | SCN3A       | -1,790799975 | 0,03554 |
| ENSG00000100302 | RASD2       | -0,933359981 | 0,03565 |
| ENSG00000204231 | RXRB        | 0,349240005  | 0,03576 |
| ENSG00000063978 | RNF4        | 0,184939995  | 0,0358  |
| ENSG00000283154 | IQCJ-SCHIP1 | 0,221709996  | 0,03595 |
| ENSG00000120162 | MOB3B       | 0,722970009  | 0,03598 |
| ENSG00000004779 | NDUFAB1     | 0,619859993  | 0,03603 |
| ENSG00000184060 | ADAP2       | 0,609309971  | 0,03609 |
| ENSG00000183751 | TBL3        | 0,523940027  | 0,03632 |
| ENSG00000211818 | TRAV39      | -2,870500088 | 0,03641 |
| ENSG00000128585 | MKLN1       | -0,33434999  | 0,03658 |
| ENSG00000164091 | WDR82       | 0,289169997  | 0,03665 |
| ENSG00000135925 | WNT10A      | -2,500699997 | 0,03666 |
| ENSG00000169026 | SLC49A3     | 0,565419972  | 0,03669 |
| ENSG00000151923 | TIAL1       | 0,254779994  | 0,0367  |
| ENSG00000173875 | ZNF791      | -0,466109991 | 0,0368  |

|                 |           |              |         |
|-----------------|-----------|--------------|---------|
| ENSG00000144619 | CNTN4     | 2,99229002   | 0,03682 |
| ENSG00000103152 | MPG       | -0,557430029 | 0,03697 |
| ENSG00000177694 | NAALADL2  | -0,662620008 | 0,03705 |
| ENSG00000065600 | TMEM206   | 0,495590001  | 0,03709 |
| ENSG00000130176 | CNN1      | -2,338929892 | 0,03715 |
| ENSG00000169062 | UPF3A     | -0,572650015 | 0,03739 |
| ENSG00000155959 | VBP1      | 0,223690003  | 0,03742 |
| ENSG00000018699 | TTC27     | 0,368140012  | 0,03755 |
| ENSG00000145220 | LYAR      | 0,825039983  | 0,03755 |
| ENSG00000131386 | GALNT15   | -2,613500118 | 0,03755 |
| ENSG00000168792 | ABHD15    | -0,534690022 | 0,03756 |
| ENSG00000166924 | NYAP1     | -0,840990007 | 0,03762 |
| ENSG00000184697 | CLDN6     | -1,659019947 | 0,03782 |
| ENSG00000142507 | PSMB6     | 0,317829996  | 0,03786 |
| ENSG00000113905 | HRG       | 3,134880066  | 0,03787 |
| ENSG00000215018 | COL28A1   | -1,333039999 | 0,03788 |
| ENSG00000235863 | B3GALT4   | -1,437729955 | 0,03793 |
| ENSG00000206820 | RNU1-138P | -2,752880096 | 0,03797 |
| ENSG00000137497 | NUMA1     | -0,496699989 | 0,03802 |
| ENSG00000134697 | GNL2      | 0,297650009  | 0,03804 |
| ENSG00000182578 | CSF1R     | 2,240950108  | 0,03804 |
| ENSG00000136026 | CKAP4     | 0,388550013  | 0,0382  |
| ENSG00000162851 | TFB2M     | 0,277079999  | 0,03822 |
| ENSG00000165072 | MAMDC2    | -2,528759956 | 0,03829 |
| ENSG00000145916 | RMND5B    | 0,544390023  | 0,03836 |
| ENSG00000002834 | LASP1     | -1,171869993 | 0,03849 |
| ENSG00000172071 | EIF2AK3   | 0,180240005  | 0,03859 |
| ENSG00000132965 | ALOX5AP   | 2,16279006   | 0,03862 |
| ENSG00000126216 | TUBGCP3   | -0,807009995 | 0,03879 |
| ENSG00000177706 | FAM20C    | -1,456740022 | 0,03894 |
| ENSG00000196150 | ZNF250    | -0,678369999 | 0,03928 |
| ENSG00000100053 | CRYBB3    | -1,301749945 | 0,03929 |
| ENSG00000162105 | SHANK2    | -1,180789948 | 0,03958 |
| ENSG00000135624 | CCT7      | 0,439999998  | 0,0396  |
| ENSG00000117013 | KCNQ4     | 0,815630019  | 0,03979 |
| ENSG00000275835 | TUBGCP5   | -0,727289975 | 0,0398  |
| ENSG00000155966 | AFF2      | 3,162319899  | 0,03982 |
| ENSG00000183638 | RP1L1     | -0,81765002  | 0,03984 |
| ENSG00000123200 | ZC3H13    | -0,295329988 | 0,03984 |
| ENSG00000207357 | RNU6-2    | -2,481990099 | 0,03996 |
| ENSG00000125538 | IL1B      | 2,298199892  | 0,0401  |
| ENSG00000156687 | UNC5D     | 5,003829956  | 0,04015 |
| ENSG00000107960 | STN1      | -0,531480014 | 0,04016 |
| ENSG00000008324 | SS18L2    | 0,228670001  | 0,04021 |
| ENSG00000105605 | CACNG7    | -2,851099968 | 0,04029 |
| ENSG00000055332 | EIF2AK2   | -0,232779995 | 0,0403  |
| ENSG00000221947 | XKR9      | 1,495300055  | 0,0404  |

|                 |           |              |         |
|-----------------|-----------|--------------|---------|
| ENSG00000130544 | ZNF557    | -0,275550008 | 0,04046 |
| ENSG0000005243  | COPZ2     | -2,363940001 | 0,04047 |
| ENSG00000135269 | TES       | -0,598219991 | 0,04051 |
| ENSG00000168807 | SNTB2     | -0,318940014 | 0,04053 |
| ENSG00000068305 | MEF2A     | -0,456110001 | 0,04056 |
| ENSG00000232810 | TNF       | 1,705469966  | 0,04061 |
| ENSG00000157542 | KCNJ6     | 2,879220009  | 0,04065 |
| ENSG00000189308 | LIN54     | -0,391380012 | 0,04091 |
| ENSG00000135002 | RFK       | 0,395579994  | 0,04096 |
| ENSG00000168237 | GLYCTK    | 0,313149989  | 0,04109 |
| ENSG00000069020 | MAST4     | -0,373050004 | 0,04116 |
| ENSG00000034152 | MAP2K3    | 0,854770005  | 0,04124 |
| ENSG00000035862 | TIMP2     | -1,258550048 | 0,04127 |
| ENSG00000087448 | KLHL42    | -0,29076001  | 0,04127 |
| ENSG00000154079 | SDHAF4    | -0,593689978 | 0,04128 |
| ENSG00000160193 | WDR4      | 0,507149994  | 0,0416  |
| ENSG00000153066 | TXNDC11   | 0,382239997  | 0,04163 |
| ENSG00000138835 | RGS3      | -0,615050018 | 0,04169 |
| ENSG00000163440 | PDCL2     | -2,393049955 | 0,04183 |
| ENSG00000142082 | SIRT3     | 0,183170006  | 0,0419  |
| ENSG00000164104 | HMGB2     | -0,467929989 | 0,04191 |
| ENSG00000129055 | ANAPC13   | 0,312299997  | 0,04191 |
| ENSG00000159792 | PSKH1     | -0,43829     | 0,04195 |
| ENSG00000115839 | RAB3GAP1  | -0,101729997 | 0,04195 |
| ENSG00000163354 | DCST2     | -0,919839978 | 0,04218 |
| ENSG00000164597 | COG5      | -0,301239997 | 0,04225 |
| ENSG00000140254 | DUOXA1    | -1,458699942 | 0,04227 |
| ENSG00000156795 | WDYHV1    | -0,270029992 | 0,04228 |
| ENSG00000143862 | ARL8A     | 0,435360014  | 0,04233 |
| ENSG00000273802 | HIST1H2BG | -1,754760027 | 0,04234 |
| ENSG00000162694 | EXTL2     | -0,379449993 | 0,04237 |
| ENSG00000167554 | ZNF610    | -2,369009972 | 0,04237 |
| ENSG00000143603 | KCNN3     | 1,07949996   | 0,04238 |
| ENSG00000161888 | SPC24     | -0,347409993 | 0,04239 |
| ENSG00000138035 | PNPT1     | 0,433279991  | 0,04256 |
| ENSG00000128482 | RNF112    | 2,003050089  | 0,04263 |
| ENSG00000179477 | ALOX12B   | 2,305210114  | 0,04269 |
| ENSG00000168769 | TET2      | -0,496639997 | 0,04274 |
| ENSG00000197405 | C5AR1     | -1,126139998 | 0,04275 |
| ENSG00000104331 | IMPAD1    | 0,365359992  | 0,04286 |
| ENSG00000145147 | SLIT2     | 2,066410065  | 0,04287 |
| ENSG00000148606 | POLR3A    | 0,355419993  | 0,04291 |
| ENSG00000157450 | RNF111    | -0,194869995 | 0,04292 |
| ENSG00000198121 | LPAR1     | -1,060479999 | 0,04301 |
| ENSG00000145041 | DCAF1     | 0,249699995  | 0,04303 |
| ENSG00000152413 | HOMER1    | 0,552900016  | 0,04317 |
| ENSG00000105835 | NAMPT     | 1,160140038  | 0,04331 |

|                 |           |              |         |
|-----------------|-----------|--------------|---------|
| ENSG00000182676 | PPP1R27   | -1,828619957 | 0,04342 |
| ENSG00000184292 | TACSTD2   | -2,205009937 | 0,04346 |
| ENSG00000224051 | CPTP      | -0,439469993 | 0,04347 |
| ENSG00000105607 | GCDH      | 0,265370011  | 0,04354 |
| ENSG00000111790 | FGFR1OP2  | -0,298949987 | 0,04354 |
| ENSG00000164796 | CSMD3     | 1,883340001  | 0,04355 |
| ENSG00000077232 | DNAJC10   | 0,517329991  | 0,04356 |
| ENSG00000152464 | RPP38     | 0,340240002  | 0,04359 |
| ENSG00000069974 | RAB27A    | -0,620079994 | 0,04377 |
| ENSG00000153531 | ADPRHL1   | -0,577719986 | 0,04382 |
| ENSG00000079739 | PGM1      | -0,419120014 | 0,04383 |
| ENSG00000116830 | TTF2      | 0,607819974  | 0,0439  |
| ENSG00000244242 | IFITM10   | -0,933770001 | 0,04403 |
| ENSG00000221843 | C2orf16   | 0,591040015  | 0,04409 |
| ENSG00000174428 | GTF2IRD2B | -0,748780012 | 0,04413 |
| ENSG00000198176 | TFDP1     | -0,502569973 | 0,0444  |
| ENSG00000163499 | CRYBA2    | 2,108939886  | 0,04442 |
| ENSG00000161036 | LRWD1     | 0,302670002  | 0,04442 |
| ENSG00000182885 | ADGRG3    | -1,87895     | 0,04448 |
| ENSG00000149972 | CNTN5     | 1,826310039  | 0,04451 |
| ENSG00000100300 | TSPO      | -0,469949991 | 0,04451 |
| ENSG00000037637 | FBXO42    | -0,420040011 | 0,04473 |
| ENSG00000196116 | TDRD7     | -0,277440012 | 0,04482 |
| ENSG00000007392 | LUC7L     | 0,553359985  | 0,04488 |
| ENSG00000163482 | STK36     | 0,577690005  | 0,04489 |
| ENSG00000130517 | PGPEP1    | -0,45006001  | 0,04493 |
| ENSG00000197747 | S100A10   | -0,816950023 | 0,04495 |
| ENSG00000011590 | ZBTB32    | 2,092920065  | 0,04498 |
| ENSG00000110148 | CCKBR     | 3,3692801    | 0,04504 |
| ENSG00000108349 | CASC3     | -0,927810013 | 0,04509 |
| ENSG00000130522 | JUND      | -0,777459979 | 0,0451  |
| ENSG00000167363 | FN3K      | -0,682889998 | 0,04519 |
| ENSG00000138615 | CILP      | -2,205780029 | 0,04521 |
| ENSG00000172057 | ORMDL3    | -1,317970037 | 0,04528 |
| ENSG00000183729 | NPBWR1    | -2,527559996 | 0,0453  |
| ENSG00000154639 | CXADR     | 0,386299998  | 0,04539 |
| ENSG00000149922 | TBX6      | -0,797209978 | 0,04563 |
| ENSG00000007520 | TSR3      | 0,378969997  | 0,04566 |
| ENSG00000075856 | SART3     | 0,262340009  | 0,04574 |
| ENSG00000188089 | PLA2G4E   | 2,370330095  | 0,04575 |
| ENSG00000171855 | IFNB1     | 2,092509985  | 0,04577 |
| ENSG00000054965 | FAM168A   | -0,329089999 | 0,04611 |
| ENSG00000205937 | RNPS1     | 0,751359999  | 0,04613 |
| ENSG00000100814 | CCNB1IP1  | -0,799329996 | 0,04636 |
| ENSG00000185361 | TNFAIP8L1 | -0,766449988 | 0,04639 |
| ENSG00000112110 | MRPL18    | 0,641309977  | 0,04664 |
| ENSG00000171291 | ZNF439    | -1,134709954 | 0,0467  |



|                 |            |              |         |
|-----------------|------------|--------------|---------|
| ENSG00000100938 | GMPR2      | -0,352979988 | 0,04673 |
| ENSG00000169230 | PRELID1    | 0,35029      | 0,04679 |
| ENSG00000087074 | PPP1R15A   | 1,155940056  | 0,04681 |
| ENSG00000138382 | METTL5     | 0,450179994  | 0,04682 |
| ENSG00000159714 | ZDHHC1     | -0,805840015 | 0,04686 |
| ENSG00000111276 | CDKN1B     | -0,404590011 | 0,04686 |
| ENSG00000072310 | SREBF1     | -0,545589983 | 0,04711 |
| ENSG00000148219 | ASTN2      | 0,746670008  | 0,04731 |
| ENSG00000110107 | PRPF19     | 0,272359997  | 0,04744 |
| ENSG00000115464 | USP34      | -0,193749994 | 0,04748 |
| ENSG0000011260  | UTP18      | 0,18716      | 0,0476  |
| ENSG00000102119 | EMD        | 0,286619991  | 0,04761 |
| ENSG00000204574 | ABCF1      | 0,358460009  | 0,04762 |
| ENSG00000099331 | MYO9B      | -0,441969991 | 0,04775 |
| ENSG00000108591 | DRG2       | 0,253989995  | 0,04783 |
| ENSG00000147533 | GOLGA7     | 0,1866       | 0,04794 |
| ENSG00000144231 | POLR2D     | 0,444460005  | 0,04795 |
| ENSG00000147536 | GINS4      | 0,524429977  | 0,0482  |
| ENSG00000134716 | CYP2J2     | 1,327170014  | 0,04829 |
| ENSG00000114248 | LRRC31     | -2,434489965 | 0,0483  |
| ENSG00000164327 | RICTOR     | -0,436769992 | 0,04831 |
| ENSG00000082556 | OPRK1      | -2,118619919 | 0,0484  |
| ENSG00000177370 | TIMM22     | 0,197500005  | 0,0484  |
| ENSG00000162676 | GFI1       | -0,774380028 | 0,04858 |
| ENSG00000125995 | ROMO1      | 0,607410014  | 0,04861 |
| ENSG00000177200 | CHD9       | -0,405449986 | 0,04866 |
| ENSG00000108821 | COL1A1     | -0,554530025 | 0,04869 |
| ENSG00000109534 | GAR1       | 0,313549995  | 0,04878 |
| ENSG00000161179 | YDJC       | 0,712149978  | 0,04888 |
| ENSG00000101811 | CSTF2      | 0,392360002  | 0,0489  |
| ENSG00000121211 | MND1       | -0,353100002 | 0,049   |
| ENSG00000128989 | ARPP19     | -0,261299998 | 0,04917 |
| ENSG00000074706 | IPCEF1     | -1,451910019 | 0,04923 |
| ENSG00000171236 | LRG1       | 1,050999999  | 0,04926 |
| ENSG00000172766 | NAA16      | -0,541079998 | 0,04926 |
| ENSG00000086015 | MAST2      | -0,277429998 | 0,0494  |
| ENSG00000101132 | PFDN4      | 0,416669995  | 0,0495  |
| ENSG00000149187 | CELF1      | 0,314319998  | 0,04951 |
| ENSG00000068024 | HDAC4      | -0,455249995 | 0,04963 |
| ENSG00000073282 | TP63       | -1,293759942 | 0,04968 |
| ENSG00000114686 | MRPL3      | 0,341690004  | 0,0497  |
| ENSG00000160285 | LSS        | -0,726390004 | 0,04977 |
| ENSG00000198223 | CSF2RA     | 3,288870096  | 0,04981 |
| ENSG00000152705 | CATSPER3   | -0,604589999 | 0,04987 |
| ENSG00000175970 | UNC119B    | -0,175940007 | 0,04988 |
| ENSG00000255641 | AC068775.1 | -1,159680009 | 0,04999 |
