# Supplementary material
Source: HighWire-hosted journal article supplement (https://gut.bmj.com/content/gutjnl-2023-331237)
Supplement: inline-supplementary-material-3 [file inline-supplementary-material-3.pdf]

| geneid_mus musculus | symbol_mus musculus | Kras/Tp53 Parp-1- vs Kras/Tp53 Parp-1+ _log2fc | Kras/Tp53 Parp-1- vs Kras/Tp53 Parp-1+ _pvalue |
|---------------------|---------------------|------------------------------------------------|------------------------------------------------|
| ENSMUSG00000024517  | Grp                 | -30,0248394                                    | 0                                              |
| ENSMUSG00000026934  | Lhx3                | -27,60709                                      | 0                                              |
| ENSMUSG00000025216  | Lbx1                | -27,52914047                                   | 0                                              |
| ENSMUSG00000047261  | Gap43               | -12,45458031                                   | 0                                              |
| ENSMUSG00000036422  | Pcdh8               | -12,42831993                                   | 0                                              |
| ENSMUSG00000054196  | Cthrc1              | -11,92236042                                   | 0                                              |
| ENSMUSG00000074637  | Sox2                | -11,76914024                                   | 0                                              |
| ENSMUSG00000000706  | Btn1a1              | -11,32540989                                   | 0                                              |
| ENSMUSG00000027500  | Stmn2               | -11,26846027                                   | 0                                              |
| ENSMUSG00000026062  | Slc9a2              | -11,12615013                                   | 0                                              |
| ENSMUSG00000004885  | Crabp2              | -11,08281994                                   | 0                                              |
| ENSMUSG00000028031  | Dkk2                | -11,05601978                                   | 0                                              |
| ENSMUSG00000049420  | Tmem200a            | -11,04395962                                   | 0                                              |
| ENSMUSG00000025582  | Nptx1               | -10,8641901                                    | 0                                              |
| ENSMUSG00000050558  | Prokr2              | -10,72437                                      | 0                                              |
| ENSMUSG00000031635  | Anxa10              | -10,72062969                                   | 0                                              |
| ENSMUSG00000019775  | Rgs17               | -10,50399017                                   | 0                                              |
| ENSMUSG00000054537  | Tmprss11e           | -10,4981699                                    | 0                                              |
| ENSMUSG00000048776  | Pthlh               | -10,4702301                                    | 0                                              |
| ENSMUSG00000022382  | Wnt7b               | -10,15962982                                   | 0                                              |
| ENSMUSG00000024846  | Cst6                | -10,15017033                                   | 0                                              |
| ENSMUSG00000055333  | Fat2                | -9,903679848                                   | 0                                              |
| ENSMUSG00000039476  | Prrx2               | -9,854120255                                   | 0                                              |
| ENSMUSG00000025432  | Avil                | -9,825960159                                   | 0                                              |
| ENSMUSG00000032281  | Acsbg1              | -9,522919655                                   | 0                                              |
| ENSMUSG00000041886  | Macc1               | -9,477399826                                   | 0                                              |
| ENSMUSG00000030351  | Tspan11             | -9,42648983                                    | 0                                              |
| ENSMUSG00000032327  | Stra6               | -9,38973999                                    | 0                                              |
| ENSMUSG00000027978  | Prss12              | -9,318070412                                   | 0                                              |
| ENSMUSG00000035274  | Tpbp                | -9,307789803                                   | 0                                              |
| ENSMUSG00000030000  | Add2                | -9,172969818                                   | 0                                              |
| ENSMUSG00000055407  | Map6                | -9,110360146                                   | 0                                              |
| ENSMUSG00000034460  | Six4                | -9,068019867                                   | 0                                              |
| ENSMUSG00000020646  | Mboat2              | -9,016819954                                   | 0                                              |
| ENSMUSG00000028883  | Sema3a              | -8,993140221                                   | 0                                              |
| ENSMUSG00000068699  | Flnc                | -8,970600128                                   | 0                                              |
| ENSMUSG00000068748  | Ptprz1              | -8,932959557                                   | 0                                              |
| ENSMUSG00000020676  | Ccl11               | -8,91753006                                    | 0                                              |
| ENSMUSG00000031026  | Trim66              | -8,881679535                                   | 0                                              |
| ENSMUSG00000029334  | Prkg2               | -8,803919792                                   | 0                                              |
| ENSMUSG00000037161  | Mgarp               | -8,774749756                                   | 0                                              |
| ENSMUSG00000020333  | Acsl6               | -8,773690224                                   | 0                                              |
| ENSMUSG00000035189  | Ano4                | -8,758700371                                   | 0                                              |
| ENSMUSG00000033213  | AA467197            | -8,741629601                                   | 0                                              |
| ENSMUSG00000032487  | Ptgs2               | -8,663909912                                   | 0                                              |

|                     |           |              |   |
|---------------------|-----------|--------------|---|
| ENSMUSG00000063851  | Rnf183    | -8,611069679 | 0 |
| ENSMUSG00000007908  | Hmgcll1   | -8,583390236 | 0 |
| ENSMUSG00000074766  | Ism1      | -8,552080154 | 0 |
| ENSMUSG000000036523 | Greb1     | -8,446640015 | 0 |
| ENSMUSG000000050711 | Scg2      | -8,425689697 | 0 |
| ENSMUSG000000060568 | Fam78b    | -8,404760361 | 0 |
| ENSMUSG000000030669 | Calca     | -8,375220299 | 0 |
| ENSMUSG000000052981 | Ube2ql1   | -8,248080254 | 0 |
| ENSMUSG000000042428 | Mgat3     | -8,174940109 | 0 |
| ENSMUSG000000039385 | Cdh6      | -8,143540382 | 0 |
| ENSMUSG000000041482 | Piezo2    | -8,08082962  | 0 |
| ENSMUSG000000028435 | Aqp3      | -8,066599846 | 0 |
| ENSMUSG000000026479 | Lamc2     | -8,064109802 | 0 |
| ENSMUSG000000062345 | Serpinb2  | -7,853280067 | 0 |
| ENSMUSG000000050288 | Fzd2      | -7,852749825 | 0 |
| ENSMUSG000000022018 | Rgcc      | -7,797870159 | 0 |
| ENSMUSG000000019102 | Aldh3a1   | -7,7822299   | 0 |
| ENSMUSG000000007805 | Twist2    | -7,751900196 | 0 |
| ENSMUSG000000052727 | Map1b     | -7,749269962 | 0 |
| ENSMUSG000000021614 | Vcan      | -7,740859985 | 0 |
| ENSMUSG000000027168 | Pax6      | -7,677370071 | 0 |
| ENSMUSG000000031290 | Lrch2     | -7,655399799 | 0 |
| ENSMUSG000000004791 | Pgf       | -7,605010033 | 0 |
| ENSMUSG000000038295 | Atg9b     | -7,591609955 | 0 |
| ENSMUSG000000021680 | Crhbp     | -7,578259945 | 0 |
| ENSMUSG000000044217 | Aqp5      | -7,575489998 | 0 |
| ENSMUSG000000052353 | Cemip     | -7,477389812 | 0 |
| ENSMUSG000000033717 | Adra2a    | -7,468239784 | 0 |
| ENSMUSG000000024867 | Pip5k1b   | -7,467110157 | 0 |
| ENSMUSG000000031340 | Gabre     | -7,460420132 | 0 |
| ENSMUSG000000007888 | Crlf1     | -7,454770088 | 0 |
| ENSMUSG000000064080 | Fbln2     | -7,434740067 | 0 |
| ENSMUSG000000046186 | Cd109     | -7,412380219 | 0 |
| ENSMUSG000000062342 | Serpinb9e | -7,377590179 | 0 |
| ENSMUSG000000032356 | Rasgrf1   | -7,353219986 | 0 |
| ENSMUSG000000042359 | Osbp16    | -7,32020998  | 0 |
| ENSMUSG000000021991 | Cacna2d3  | -7,314360142 | 0 |
| ENSMUSG000000024302 | Dtna      | -7,311749935 | 0 |
| ENSMUSG000000026069 | Il1r1     | -7,304269791 | 0 |
| ENSMUSG000000026204 | Ptprn     | -7,276040077 | 0 |
| ENSMUSG000000031297 | Slc7a3    | -7,25440979  | 0 |
| ENSMUSG000000037605 | Adgrl3    | -7,238349915 | 0 |
| ENSMUSG000000024968 | Rcor2     | -7,237500191 | 0 |
| ENSMUSG000000021359 | Tfap2a    | -7,230070114 | 0 |
| ENSMUSG000000001131 | Timp1     | -7,189509869 | 0 |
| ENSMUSG000000022203 | Efs       | -7,170859814 | 0 |
| ENSMUSG000000037624 | Kcnk2     | -7,16505003  | 0 |

|                    |               |              |   |
|--------------------|---------------|--------------|---|
| ENSMUSG00000015134 | Aldh1a3       | -7,123630047 | 0 |
| ENSMUSG00000031558 | Slit2         | -7,121729851 | 0 |
| ENSMUSG00000039058 | Ak5           | -7,119520187 | 0 |
| ENSMUSG00000032502 | Stac          | -7,106170177 | 0 |
| ENSMUSG00000056596 | Trnp1         | -7,105760098 | 0 |
| ENSMUSG00000034112 | Atp2c2        | -7,084050179 | 0 |
| ENSMUSG00000056427 | Slit3         | -7,073359966 | 0 |
| ENSMUSG00000043020 | Wdr63         | -7,056509972 | 0 |
| ENSMUSG00000038264 | Sema7a        | -7,049109936 | 0 |
| ENSMUSG00000059336 | Slc14a1       | -7,027629852 | 0 |
| ENSMUSG00000036912 | Piwil4        | -7,021709919 | 0 |
| ENSMUSG00000031780 | Ccl17         | -7,017990112 | 0 |
| ENSMUSG00000038319 | Kcnh2         | -6,962180138 | 0 |
| ENSMUSG00000019124 | Scrn1         | -6,961480141 | 0 |
| ENSMUSG00000025161 | Slc16a3       | -6,942689896 | 0 |
| ENSMUSG00000028583 | Pdpm          | -6,940989971 | 0 |
| ENSMUSG00000026418 | Tnni1         | -6,94051981  | 0 |
| ENSMUSG00000017400 | Stac2         | -6,875209808 | 0 |
| ENSMUSG00000001864 | Aif1l         | -6,873730183 | 0 |
| ENSMUSG00000034209 | Rasl10a       | -6,871990204 | 0 |
| ENSMUSG00000028033 | Kcnq5         | -6,862020016 | 0 |
| ENSMUSG00000074480 | Mex3a         | -6,844009876 | 0 |
| ENSMUSG00000032374 | Plod2         | -6,810500145 | 0 |
| ENSMUSG00000026090 | 2010300C02Rik | -6,789509773 | 0 |
| ENSMUSG00000029223 | Uchl1         | -6,781869888 | 0 |
| ENSMUSG00000042734 | Ttc9          | -6,765510082 | 0 |
| ENSMUSG00000026235 | Epha4         | -6,764239788 | 0 |
| ENSMUSG00000021662 | Arhgef28      | -6,761000156 | 0 |
| ENSMUSG00000001497 | Pax9          | -6,759490013 | 0 |
| ENSMUSG00000063011 | Msln          | -6,73980999  | 0 |
| ENSMUSG00000030208 | Emp1          | -6,731619835 | 0 |
| ENSMUSG00000042751 | Nmnat2        | -6,72947979  | 0 |
| ENSMUSG00000029121 | Crmp1         | -6,678279877 | 0 |
| ENSMUSG00000024912 | Fosl1         | -6,655700207 | 0 |
| ENSMUSG00000025128 | Bhlhe22       | -6,65515995  | 0 |
| ENSMUSG00000002565 | Scin          | -6,64730978  | 0 |
| ENSMUSG00000041245 | Wnk3          | -6,61646986  | 0 |
| ENSMUSG00000054342 | Kcnn4         | -6,589680195 | 0 |
| ENSMUSG00000044337 | Ackr3         | -6,575600147 | 0 |
| ENSMUSG00000028965 | Tnfrsf9       | -6,564849854 | 0 |
| ENSMUSG00000042367 | Gjb3          | -6,562290192 | 0 |
| ENSMUSG00000031548 | Sfrp1         | -6,560329914 | 0 |
| ENSMUSG00000025855 | Prkar1b       | -6,560130119 | 0 |
| ENSMUSG00000028370 | Pappa         | -6,526370049 | 0 |
| ENSMUSG00000027239 | Mdk           | -6,522130013 | 0 |
| ENSMUSG00000049538 | Adamts16      | -6,515490055 | 0 |
| ENSMUSG00000067780 | Pi15          | -6,502649784 | 0 |

|                    |               |              |   |
|--------------------|---------------|--------------|---|
| ENSMUSG00000078532 | Nkain1        | -6,497570038 | 0 |
| ENSMUSG00000026817 | Ak1           | -6,497449875 | 0 |
| ENSMUSG00000020911 | Krt19         | -6,487160206 | 0 |
| ENSMUSG00000035246 | Pcyt1b        | -6,486169815 | 0 |
| ENSMUSG00000054951 | 9130008F23Rik | -6,483829975 | 0 |
| ENSMUSG00000063531 | Sema3e        | -6,455500126 | 0 |
| ENSMUSG00000044288 | Cnr1          | -6,455039978 | 0 |
| ENSMUSG00000031538 | Plat          | -6,452519894 | 0 |
| ENSMUSG00000001349 | Cnn1          | -6,449649811 | 0 |
| ENSMUSG00000005148 | Klf5          | -6,386489868 | 0 |
| ENSMUSG00000001025 | S100a6        | -6,332660198 | 0 |
| ENSMUSG00000048078 | Tenm4         | -6,330480099 | 0 |
| ENSMUSG00000043333 | Rhbdl2        | -6,329949856 | 0 |
| ENSMUSG00000029378 | Areg          | -6,316619873 | 0 |
| ENSMUSG00000060402 | Chst8         | -6,286439896 | 0 |
| ENSMUSG00000055639 | Dach1         | -6,269499779 | 0 |
| ENSMUSG00000051379 | Flrt3         | -6,257259846 | 0 |
| ENSMUSG00000034612 | Chst11        | -6,221159935 | 0 |
| ENSMUSG00000024529 | Lox           | -6,219490051 | 0 |
| ENSMUSG00000057914 | Cacnb2        | -6,205930233 | 0 |
| ENSMUSG00000040152 | Thbs1         | -6,176380157 | 0 |
| ENSMUSG00000039542 | Ncam1         | -6,170829773 | 0 |
| ENSMUSG00000006369 | Fbln1         | -6,166890144 | 0 |
| ENSMUSG00000074604 | Mgst2         | -6,166120052 | 0 |
| ENSMUSG00000031075 | Ano1          | -6,145939827 | 0 |
| ENSMUSG00000036356 | Csgalnact1    | -6,143179893 | 0 |
| ENSMUSG00000015652 | Steap1        | -6,141799927 | 0 |
| ENSMUSG00000048644 | Ctxn1         | -6,125370026 | 0 |
| ENSMUSG00000027221 | Chst1         | -6,119390011 | 0 |
| ENSMUSG00000048807 | Slc35e4       | -6,109020233 | 0 |
| ENSMUSG00000041608 | Entpd3        | -6,093780041 | 0 |
| ENSMUSG00000040998 | Npnt          | -6,081120014 | 0 |
| ENSMUSG00000046733 | Gprc5a        | -6,06388998  | 0 |
| ENSMUSG00000024803 | Ankrd1        | -6,054580212 | 0 |
| ENSMUSG00000072812 | Ahnak2        | -6,002319813 | 0 |
| ENSMUSG00000025420 | Katnal2       | -5,990580082 | 0 |
| ENSMUSG00000002900 | Lamb1         | -5,990200043 | 0 |
| ENSMUSG00000024883 | Rin1          | -5,974559784 | 0 |
| ENSMUSG00000060924 | Csmd1         | -5,970580101 | 0 |
| ENSMUSG00000027994 | Mcub          | -5,962890148 | 0 |
| ENSMUSG00000021913 | Ogdhl         | -5,960120201 | 0 |
| ENSMUSG00000036111 | Lmo1          | -5,951930046 | 0 |
| ENSMUSG00000071064 | Zfp827        | -5,937260151 | 0 |
| ENSMUSG00000026586 | Prrx1         | -5,925829887 | 0 |
| ENSMUSG00000032925 | Itgbl1        | -5,919720173 | 0 |
| ENSMUSG00000026825 | Dnm1          | -5,902800083 | 0 |
| ENSMUSG00000036030 | Prtg          | -5,864490032 | 0 |

|                    |          |              |   |
|--------------------|----------|--------------|---|
| ENSMUSG00000021062 | Rab15    | -5,847370148 | 0 |
| ENSMUSG00000020607 | Fam84a   | -5,845349789 | 0 |
| ENSMUSG00000060572 | Mfap2    | -5,814620018 | 0 |
| ENSMUSG00000036412 | Arsi     | -5,807479858 | 0 |
| ENSMUSG00000027420 | Bfsp1    | -5,79956007  | 0 |
| ENSMUSG00000022754 | Tmem45a  | -5,79090023  | 0 |
| ENSMUSG00000061878 | Sphk1    | -5,785639763 | 0 |
| ENSMUSG00000034706 | Dnaic2   | -5,777329922 | 0 |
| ENSMUSG00000038400 | Pmepa1   | -5,753419876 | 0 |
| ENSMUSG00000025352 | Gdf11    | -5,729109764 | 0 |
| ENSMUSG00000020758 | Itgb4    | -5,724609852 | 0 |
| ENSMUSG00000036564 | Ndrp4    | -5,695020199 | 0 |
| ENSMUSG00000043541 | Casc1    | -5,690169811 | 0 |
| ENSMUSG00000015957 | Wnt11    | -5,682489872 | 0 |
| ENSMUSG00000027797 | Dclk1    | -5,668019772 | 0 |
| ENSMUSG00000004864 | Mapk13   | -5,667990208 | 0 |
| ENSMUSG00000040812 | Agbl2    | -5,66573     | 0 |
| ENSMUSG00000037010 | Apln     | -5,64248991  | 0 |
| ENSMUSG00000018623 | Mmp7     | -5,630139828 | 0 |
| ENSMUSG00000021950 | Anxa8    | -5,625400066 | 0 |
| ENSMUSG00000037613 | Tnfrsf23 | -5,618400097 | 0 |
| ENSMUSG00000035775 | Krt20    | -5,615540028 | 0 |
| ENSMUSG00000030111 | A2m      | -5,604810238 | 0 |
| ENSMUSG00000026073 | Il1r2    | -5,590990067 | 0 |
| ENSMUSG00000021822 | Plau     | -5,586810112 | 0 |
| ENSMUSG00000062184 | Hs6st2   | -5,551469803 | 0 |
| ENSMUSG00000022952 | Runx1    | -5,539929867 | 0 |
| ENSMUSG00000040950 | Mgl2     | -5,507860184 | 0 |
| ENSMUSG00000024268 | Celf4    | -5,507780075 | 0 |
| ENSMUSG00000008136 | Fhl2     | -5,499810219 | 0 |
| ENSMUSG00000033805 | Ephx4    | -5,495920181 | 0 |
| ENSMUSG00000021994 | Wnt5a    | -5,488999844 | 0 |
| ENSMUSG00000062661 | Ncs1     | -5,480700016 | 0 |
| ENSMUSG00000029094 | Afap1    | -5,45359993  | 0 |
| ENSMUSG00000031647 | Mfap3l   | -5,45031023  | 0 |
| ENSMUSG00000029659 | Medag    | -5,447350025 | 0 |
| ENSMUSG00000043102 | Qrfp     | -5,439610004 | 0 |
| ENSMUSG00000029108 | Pcdh7    | -5,433390141 | 0 |
| ENSMUSG00000035799 | Twist1   | -5,431099892 | 0 |
| ENSMUSG00000001506 | Col1a1   | -5,429230213 | 0 |
| ENSMUSG00000037239 | Spred3   | -5,428420067 | 0 |
| ENSMUSG00000004891 | Nes      | -5,426370144 | 0 |
| ENSMUSG00000032625 | Thsd7a   | -5,423240185 | 0 |
| ENSMUSG00000047205 | Dusp18   | -5,401090145 | 0 |
| ENSMUSG00000051022 | Hs3st1   | -5,381309986 | 0 |
| ENSMUSG00000031273 | Col4a6   | -5,380519867 | 0 |
| ENSMUSG00000029377 | Ereg     | -5,378719807 | 0 |

|                     |          |              |   |
|---------------------|----------|--------------|---|
| ENSMUSG00000041889  | Shisa4   | -5,376309872 | 0 |
| ENSMUSG00000021318  | Gli3     | -5,373099804 | 0 |
| ENSMUSG00000001870  | Ltbp1    | -5,37184     | 0 |
| ENSMUSG000000031673 | Cdh11    | -5,361030102 | 0 |
| ENSMUSG000000062309 | Rpp25    | -5,360620022 | 0 |
| ENSMUSG000000046714 | Foxc2    | -5,360010147 | 0 |
| ENSMUSG000000055926 | Gm14137  | -5,355229855 | 0 |
| ENSMUSG000000028364 | Tnc      | -5,350769997 | 0 |
| ENSMUSG000000031146 | Plp2     | -5,331140041 | 0 |
| ENSMUSG000000034675 | Dbn1     | -5,330739975 | 0 |
| ENSMUSG000000029510 | Gpc2     | -5,317530155 | 0 |
| ENSMUSG000000039126 | Prune2   | -5,301760197 | 0 |
| ENSMUSG000000023906 | Cldn6    | -5,291309834 | 0 |
| ENSMUSG000000023885 | Thbs2    | -5,28801012  | 0 |
| ENSMUSG000000020668 | Kif3c    | -5,287169933 | 0 |
| ENSMUSG000000046318 | Ccbe1    | -5,283679962 | 0 |
| ENSMUSG000000026413 | Pkp1     | -5,26500988  | 0 |
| ENSMUSG000000046223 | Plaur    | -5,264969826 | 0 |
| ENSMUSG000000038463 | Olfml2b  | -5,25785017  | 0 |
| ENSMUSG000000057762 | Gm6169   | -5,25138998  | 0 |
| ENSMUSG000000041696 | Rasl12   | -5,247759819 | 0 |
| ENSMUSG000000031740 | Mmp2     | -5,246459961 | 0 |
| ENSMUSG000000023032 | Slc4a8   | -5,241380215 | 0 |
| ENSMUSG000000027276 | Jag1     | -5,239520073 | 0 |
| ENSMUSG000000041120 | Nbl1     | -5,229090214 | 0 |
| ENSMUSG000000036273 | Lrrk2    | -5,227630138 | 0 |
| ENSMUSG000000029096 | Htra3    | -5,218999863 | 0 |
| ENSMUSG000000064023 | Klk8     | -5,218770027 | 0 |
| ENSMUSG000000010751 | Tnfrsf22 | -5,194039822 | 0 |
| ENSMUSG000000021760 | Gpx8     | -5,182940006 | 0 |
| ENSMUSG000000053687 | Dpep2    | -5,179900169 | 0 |
| ENSMUSG000000050295 | Foxc1    | -5,176559925 | 0 |
| ENSMUSG000000031239 | Itm2a    | -5,1698699   | 0 |
| ENSMUSG000000026414 | Tnnt2    | -5,165830135 | 0 |
| ENSMUSG000000042804 | Gpr153   | -5,156370163 | 0 |
| ENSMUSG000000053141 | Ptprt    | -5,099359989 | 0 |
| ENSMUSG000000034520 | Gjc1     | -5,096940041 | 0 |
| ENSMUSG000000075012 | Fjx1     | -5,088150024 | 0 |
| ENSMUSG000000031904 | Slc7a6   | -5,086339951 | 0 |
| ENSMUSG000000024598 | Fbn2     | -5,085619926 | 0 |
| ENSMUSG000000026728 | Vim      | -5,066359997 | 0 |
| ENSMUSG000000017724 | Etv4     | -5,058209896 | 0 |
| ENSMUSG000000024924 | Vldlr    | -5,056819916 | 0 |
| ENSMUSG000000039911 | Spsb1    | -5,049980164 | 0 |
| ENSMUSG000000078485 | Plekhn1  | -5,049479961 | 0 |
| ENSMUSG000000006205 | Htra1    | -5,037849903 | 0 |
| ENSMUSG000000042035 | Igsf3    | -5,035600185 | 0 |

|                    |          |              |   |
|--------------------|----------|--------------|---|
| ENSMUSG00000032899 | Styk1    | -5,002200127 | 0 |
| ENSMUSG00000041734 | Kirrel   | -4,997499943 | 0 |
| ENSMUSG00000047821 | Trim16   | -4,992809772 | 0 |
| ENSMUSG00000015766 | Eps8     | -4,955299854 | 0 |
| ENSMUSG00000037138 | Aff3     | -4,952889919 | 0 |
| ENSMUSG00000050064 | Zfp697   | -4,952050209 | 0 |
| ENSMUSG00000034295 | Fhod3    | -4,930950165 | 0 |
| ENSMUSG00000037060 | Cavin3   | -4,923150063 | 0 |
| ENSMUSG00000035390 | Brsk1    | -4,922160149 | 0 |
| ENSMUSG00000030796 | Tead2    | -4,918000221 | 0 |
| ENSMUSG00000031284 | Pak3     | -4,916969776 | 0 |
| ENSMUSG00000037784 | Dzip1l   | -4,899769783 | 0 |
| ENSMUSG00000045349 | Sh2d5    | -4,890590191 | 0 |
| ENSMUSG00000068220 | Lgals1   | -4,890379906 | 0 |
| ENSMUSG00000048612 | Myof     | -4,881269932 | 0 |
| ENSMUSG00000021306 | Gpr137b  | -4,874800205 | 0 |
| ENSMUSG00000020407 | Upp1     | -4,873650074 | 0 |
| ENSMUSG00000034593 | Myo5a    | -4,859509945 | 0 |
| ENSMUSG00000004151 | Etv1     | -4,855700016 | 0 |
| ENSMUSG00000025804 | Ccr1     | -4,848539829 | 0 |
| ENSMUSG00000014602 | Kif1a    | -4,847459793 | 0 |
| ENSMUSG00000045763 | Basp1    | -4,843520164 | 0 |
| ENSMUSG00000020363 | Gfpt2    | -4,843060017 | 0 |
| ENSMUSG00000027298 | Tyro3    | -4,841119766 | 0 |
| ENSMUSG00000033722 | BC034090 | -4,837269783 | 0 |
| ENSMUSG00000037568 | Vash2    | -4,836909771 | 0 |
| ENSMUSG00000003352 | Cacnb3   | -4,833459854 | 0 |
| ENSMUSG00000063296 | Tmem117  | -4,8083601   | 0 |
| ENSMUSG00000050953 | Gja1     | -4,795670033 | 0 |
| ENSMUSG00000020427 | Igfbp3   | -4,794340134 | 0 |
| ENSMUSG00000030257 | Srgap3   | -4,79365015  | 0 |
| ENSMUSG00000040289 | Hey1     | -4,76320982  | 0 |
| ENSMUSG00000072235 | Tuba1a   | -4,744689941 | 0 |
| ENSMUSG00000042109 | Csdc2    | -4,743070126 | 0 |
| ENSMUSG00000021728 | Emb      | -4,741549969 | 0 |
| ENSMUSG00000070867 | Trabd2b  | -4,736989975 | 0 |
| ENSMUSG00000069171 | Nr2f1    | -4,735060215 | 0 |
| ENSMUSG00000029661 | Col1a2   | -4,729489803 | 0 |
| ENSMUSG00000034205 | Loxl2    | -4,71750021  | 0 |
| ENSMUSG00000028541 | B4galt2  | -4,71532011  | 0 |
| ENSMUSG00000038156 | Spon1    | -4,711490154 | 0 |
| ENSMUSG00000050737 | Ptges    | -4,710659981 | 0 |
| ENSMUSG00000078249 | Hmga1b   | -4,696760178 | 0 |
| ENSMUSG00000046711 | Hmga1    | -4,693900108 | 0 |
| ENSMUSG00000001521 | Tulp3    | -4,673719883 | 0 |
| ENSMUSG00000031342 | Gpm6b    | -4,652279854 | 0 |
| ENSMUSG00000013584 | Aldh1a2  | -4,650780201 | 0 |



|                    |          |              |   |
|--------------------|----------|--------------|---|
| ENSMUSG00000049307 | Fut4     | -4,641719818 | 0 |
| ENSMUSG00000047414 | Flrt2    | -4,640799999 | 0 |
| ENSMUSG00000070436 | Serpinh1 | -4,638539791 | 0 |
| ENSMUSG00000020674 | Pxdn     | -4,627009869 | 0 |
| ENSMUSG00000001555 | Fkbp10   | -4,623710155 | 0 |
| ENSMUSG00000024501 | Dpysl3   | -4,61221981  | 0 |
| ENSMUSG00000034463 | Scara3   | -4,601920128 | 0 |
| ENSMUSG00000010830 | Kdelr3   | -4,600649834 | 0 |
| ENSMUSG00000040990 | Sh3kbp1  | -4,590300083 | 0 |
| ENSMUSG00000022421 | Nptxr    | -4,586550236 | 0 |
| ENSMUSG00000032294 | Pkm      | -4,570869923 | 0 |
| ENSMUSG00000027985 | Lef1     | -4,55603981  | 0 |
| ENSMUSG00000031778 | Cx3cl1   | -4,546629906 | 0 |
| ENSMUSG00000033585 | Ndn      | -4,546140194 | 0 |
| ENSMUSG00000030717 | Nupr1    | -4,525680065 | 0 |
| ENSMUSG00000003541 | Ier3     | -4,503129959 | 0 |
| ENSMUSG00000026726 | Cubn     | -4,497620106 | 0 |
| ENSMUSG00000031880 | Rrad     | -4,486410141 | 0 |
| ENSMUSG00000005087 | Cd44     | -4,481649876 | 0 |
| ENSMUSG00000070858 | Gm1673   | -4,478069782 | 0 |
| ENSMUSG00000015619 | Gata3    | -4,469779968 | 0 |
| ENSMUSG00000028040 | Efna4    | -4,465129852 | 0 |
| ENSMUSG00000037012 | Hk1      | -4,463170052 | 0 |
| ENSMUSG00000024659 | Anxa1    | -4,459199905 | 0 |
| ENSMUSG00000073293 | Nudt10   | -4,458859921 | 0 |
| ENSMUSG00000040118 | Cacna2d1 | -4,450079918 | 0 |
| ENSMUSG00000043557 | Mdga1    | -4,449329853 | 0 |
| ENSMUSG00000024486 | Hbegf    | -4,443339825 | 0 |
| ENSMUSG00000056214 | Pard6g   | -4,43930006  | 0 |
| ENSMUSG00000051890 | Klhdc1   | -4,433469772 | 0 |
| ENSMUSG00000045362 | Tnfrsf26 | -4,427959919 | 0 |
| ENSMUSG00000041313 | Slc7a1   | -4,42621994  | 0 |
| ENSMUSG00000026494 | Kif26b   | -4,417449951 | 0 |
| ENSMUSG00000054555 | Adam12   | -4,417140007 | 0 |
| ENSMUSG00000039787 | Cercam   | -4,413710117 | 0 |
| ENSMUSG00000032334 | Loxl1    | -4,411910057 | 0 |
| ENSMUSG00000026837 | Col5a1   | -4,410009861 | 0 |
| ENSMUSG00000024087 | Cyp1b1   | -4,399000168 | 0 |
| ENSMUSG00000027315 | Spint1   | -4,396319866 | 0 |
| ENSMUSG00000078486 | Perm1    | -4,396220207 | 0 |
| ENSMUSG00000038668 | Lpar1    | -4,389180183 | 0 |
| ENSMUSG00000041189 | Chrn1    | -4,386899948 | 0 |
| ENSMUSG00000051790 | Nlgn2    | -4,359789848 | 0 |
| ENSMUSG00000042759 | Apobr    | -4,356569767 | 0 |
| ENSMUSG00000052415 | Tchh     | -4,355319977 | 0 |
| ENSMUSG00000029581 | Fscn1    | -4,340489864 | 0 |
| ENSMUSG00000054863 | Fam19a5  | -4,340429783 | 0 |



|                    |         |              |   |
|--------------------|---------|--------------|---|
| ENSMUSG00000040717 | Il17rd  | -4,335430145 | 0 |
| ENSMUSG00000017466 | Timp2   | -4,32777977  | 0 |
| ENSMUSG00000031383 | Dusp9   | -4,3229599   | 0 |
| ENSMUSG00000074364 | Ehd2    | -4,322649956 | 0 |
| ENSMUSG00000025321 | Itgb8   | -4,315000057 | 0 |
| ENSMUSG00000040035 | Disp2   | -4,314849854 | 0 |
| ENSMUSG00000004698 | Hdac9   | -4,311260223 | 0 |
| ENSMUSG00000022231 | Sema5a  | -4,307089806 | 0 |
| ENSMUSG00000020905 | Usp43   | -4,304920197 | 0 |
| ENSMUSG00000027134 | Lpcat4  | -4,299270153 | 0 |
| ENSMUSG00000051444 | Bbs12   | -4,294640064 | 0 |
| ENSMUSG00000043079 | Synpo   | -4,292600155 | 0 |
| ENSMUSG00000042821 | Snai1   | -4,285689831 | 0 |
| ENSMUSG00000060671 | Atp8b2  | -4,279329777 | 0 |
| ENSMUSG00000025212 | Sfxn3   | -4,271070004 | 0 |
| ENSMUSG00000015222 | Map2    | -4,261189938 | 0 |
| ENSMUSG00000054675 | Tmem119 | -4,257180214 | 0 |
| ENSMUSG00000022438 | Parvb   | -4,254990101 | 0 |
| ENSMUSG00000034573 | Ptpn13  | -4,249770164 | 0 |
| ENSMUSG00000033152 | Podxl2  | -4,248770237 | 0 |
| ENSMUSG00000000628 | Hk2     | -4,248310089 | 0 |
| ENSMUSG00000046841 | Ckap4   | -4,245200157 | 0 |
| ENSMUSG00000030218 | Mgp     | -4,24450016  | 0 |
| ENSMUSG00000027111 | Itga6   | -4,243000031 | 0 |
| ENSMUSG00000042272 | Sestd1  | -4,236360073 | 0 |
| ENSMUSG00000002020 | Ltbp2   | -4,231410027 | 0 |
| ENSMUSG00000028927 | Padi2   | -4,223360062 | 0 |
| ENSMUSG00000024533 | Spire1  | -4,217840195 | 0 |
| ENSMUSG00000033581 | Igf2bp2 | -4,20664978  | 0 |
| ENSMUSG00000034686 | Prr7    | -4,205749989 | 0 |
| ENSMUSG00000061815 | Rufy4   | -4,205349922 | 0 |
| ENSMUSG00000041046 | Ramp3   | -4,191850185 | 0 |
| ENSMUSG00000025931 | Paqr8   | -4,184599876 | 0 |
| ENSMUSG00000058070 | Eml1    | -4,172150135 | 0 |
| ENSMUSG00000020886 | Dlg4    | -4,17027998  | 0 |
| ENSMUSG00000022440 | C1qtnf6 | -4,168670177 | 0 |
| ENSMUSG00000035835 | Plppr3  | -4,168469906 | 0 |
| ENSMUSG00000027777 | Schip1  | -4,158740044 | 0 |
| ENSMUSG00000028970 | Abcb1b  | -4,15816021  | 0 |
| ENSMUSG00000018906 | P4ha2   | -4,153989792 | 0 |
| ENSMUSG00000023827 | Agpat4  | -4,150660038 | 0 |
| ENSMUSG00000014786 | Slc9a5  | -4,149889946 | 0 |
| ENSMUSG00000022995 | Enah    | -4,149040222 | 0 |
| ENSMUSG00000028909 | Ptpru   | -4,148819923 | 0 |
| ENSMUSG00000029552 | Tes     | -4,142099857 | 0 |
| ENSMUSG00000026043 | Col3a1  | -4,131680012 | 0 |
| ENSMUSG00000018339 | Gpx3    | -4,124670029 | 0 |

|                    |         |              |   |
|--------------------|---------|--------------|---|
| ENSMUSG00000021253 | Tgfb3   | -4,121920109 | 0 |
| ENSMUSG00000026879 | Gsn     | -4,114900112 | 0 |
| ENSMUSG00000006931 | P3h4    | -4,109459877 | 0 |
| ENSMUSG00000028347 | Tmeff1  | -4,108870029 | 0 |
| ENSMUSG00000025473 | Adam8   | -4,106790066 | 0 |
| ENSMUSG00000035314 | Gdpd5   | -4,105480194 | 0 |
| ENSMUSG00000052397 | Ezr     | -4,098390102 | 0 |
| ENSMUSG00000028041 | Adam15  | -4,09829998  | 0 |
| ENSMUSG00000022415 | Syng1   | -4,095019817 | 0 |
| ENSMUSG00000032911 | Cspg4   | -4,09236002  | 0 |
| ENSMUSG00000044770 | Scml4   | -4,089690208 | 0 |
| ENSMUSG00000020937 | Plcd3   | -4,077720165 | 0 |
| ENSMUSG00000031562 | Dctd    | -4,076039791 | 0 |
| ENSMUSG00000013236 | Ptprs   | -4,072020054 | 0 |
| ENSMUSG00000041440 | Gk5     | -4,064849854 | 0 |
| ENSMUSG00000015653 | Steap2  | -4,062709808 | 0 |
| ENSMUSG00000024511 | Rab27b  | -4,060619831 | 0 |
| ENSMUSG00000038843 | Gcnt1   | -4,058990002 | 0 |
| ENSMUSG00000042515 | Mum1l1  | -4,056069851 | 0 |
| ENSMUSG00000023809 | Rps6ka2 | -4,047140121 | 0 |
| ENSMUSG00000047443 | Erfe    | -4,034450054 | 0 |
| ENSMUSG00000035735 | Dagla   | -4,032660007 | 0 |
| ENSMUSG00000079523 | Tmsb10  | -4,028120041 | 0 |
| ENSMUSG00000007207 | Stx1a   | -4,027540207 | 0 |
| ENSMUSG00000025324 | Atp10a  | -4,02684021  | 0 |
| ENSMUSG00000017737 | Mmp9    | -4,02489996  | 0 |
| ENSMUSG00000032020 | Ubash3b | -4,021890163 | 0 |
| ENSMUSG00000055485 | Soga1   | -4,015349865 | 0 |
| ENSMUSG00000028464 | Tpm2    | -3,996249914 | 0 |
| ENSMUSG00000026796 | Fam129b | -3,99338007  | 0 |
| ENSMUSG00000022176 | Rem2    | -3,99161005  | 0 |
| ENSMUSG00000034614 | Pik3ip1 | -3,978319883 | 0 |
| ENSMUSG00000040187 | Arntl2  | -3,96897006  | 0 |
| ENSMUSG00000031328 | Flna    | -3,9630301   | 0 |
| ENSMUSG00000045348 | Nyap1   | -3,960989952 | 0 |
| ENSMUSG00000042757 | Tmem108 | -3,958820105 | 0 |
| ENSMUSG00000009731 | Kcnd1   | -3,955549955 | 0 |
| ENSMUSG00000047181 | Samd14  | -3,953809977 | 0 |
| ENSMUSG00000020695 | Mrc2    | -3,950870037 | 0 |
| ENSMUSG00000020042 | Btbd11  | -3,94975996  | 0 |
| ENSMUSG00000022324 | Matn2   | -3,943589926 | 0 |
| ENSMUSG00000031636 | Pdlim3  | -3,931420088 | 0 |
| ENSMUSG00000028780 | Sema3c  | -3,924619913 | 0 |
| ENSMUSG00000001119 | Col6a1  | -3,920670033 | 0 |
| ENSMUSG00000026785 | Pkn3    | -3,919120073 | 0 |
| ENSMUSG00000022479 | Vdr     | -3,912780046 | 0 |
| ENSMUSG00000027646 | Src     | -3,910830021 | 0 |

|                    |               |              |   |
|--------------------|---------------|--------------|---|
| ENSMUSG0000004665  | Cnn2          | -3,90512991  | 0 |
| ENSMUSG00000032657 | Fam189b       | -3,903820038 | 0 |
| ENSMUSG00000024743 | Syt7          | -3,900130033 | 0 |
| ENSMUSG00000027827 | Kcnab1        | -3,898530006 | 0 |
| ENSMUSG00000026930 | Gpsm1         | -3,880599976 | 0 |
| ENSMUSG00000057604 | Lmcd1         | -3,878690004 | 0 |
| ENSMUSG00000040212 | Emp3          | -3,876159906 | 0 |
| ENSMUSG00000010660 | Plcd1         | -3,870300055 | 0 |
| ENSMUSG00000040907 | Atp1a3        | -3,853770018 | 0 |
| ENSMUSG00000024940 | Ltbp3         | -3,846699953 | 0 |
| ENSMUSG00000024059 | Clip4         | -3,840440035 | 0 |
| ENSMUSG00000037813 | D630003M21Rik | -3,838360071 | 0 |
| ENSMUSG00000023411 | Nfatc4        | -3,836709976 | 0 |
| ENSMUSG00000034317 | Trim59        | -3,836060047 | 0 |
| ENSMUSG00000025978 | Rftn2         | -3,834500074 | 0 |
| ENSMUSG00000031633 | Slc25a4       | -3,830039978 | 0 |
| ENSMUSG00000005958 | Ephb3         | -3,824709892 | 0 |
| ENSMUSG00000031841 | Cdh13         | -3,813090086 | 0 |
| ENSMUSG00000046387 | Pcdhb17       | -3,807009935 | 0 |
| ENSMUSG00000045667 | Smtnl2        | -3,802239895 | 0 |
| ENSMUSG00000029309 | Sparcl1       | -3,800970078 | 0 |
| ENSMUSG00000045838 | Ccdc9b        | -3,792880058 | 0 |
| ENSMUSG00000028173 | Wls           | -3,787250042 | 0 |
| ENSMUSG00000068115 | Ninl          | -3,779900074 | 0 |
| ENSMUSG00000021196 | Pfcp          | -3,776319981 | 0 |
| ENSMUSG00000001300 | Efnb2         | -3,766289949 | 0 |
| ENSMUSG00000018648 | Dusp14        | -3,765670061 | 0 |
| ENSMUSG00000024909 | Efemp2        | -3,765029907 | 0 |
| ENSMUSG00000031207 | Msn           | -3,760950089 | 0 |
| ENSMUSG00000020121 | Srgap1        | -3,757849932 | 0 |
| ENSMUSG00000048696 | Mex3d         | -3,753789902 | 0 |
| ENSMUSG00000016918 | Sulf1         | -3,746170044 | 0 |
| ENSMUSG00000026211 | Obsl1         | -3,743370056 | 0 |
| ENSMUSG00000024376 | Epb41l4a      | -3,73465991  | 0 |
| ENSMUSG00000032324 | Tspan3        | -3,730870008 | 0 |
| ENSMUSG00000038984 | Tspyl5        | -3,717240095 | 0 |
| ENSMUSG00000017314 | Mpp2          | -3,712980032 | 0 |
| ENSMUSG00000048895 | Cdk5r1        | -3,707609892 | 0 |
| ENSMUSG00000014303 | Glis2         | -3,706660032 | 0 |
| ENSMUSG00000030790 | Adm           | -3,700989962 | 0 |
| ENSMUSG00000023050 | Map3k12       | -3,685739994 | 0 |
| ENSMUSG00000023913 | Pla2g7        | -3,68208003  | 0 |
| ENSMUSG00000036856 | Wnt4          | -3,681309938 | 0 |
| ENSMUSG00000062175 | Tgif2         | -3,679120064 | 0 |
| ENSMUSG00000030970 | Ctbp2         | -3,6698699   | 0 |
| ENSMUSG00000051166 | Eml5          | -3,663719893 | 0 |
| ENSMUSG00000056481 | Cd248         | -3,663429976 | 0 |

|                    |           |              |   |
|--------------------|-----------|--------------|---|
| ENSMUSG00000040852 | Plekhh2   | -3,659179926 | 0 |
| ENSMUSG00000022206 | Npr3      | -3,657020092 | 0 |
| ENSMUSG00000022489 | Pde1b     | -3,644809961 | 0 |
| ENSMUSG00000022816 | Fstl1     | -3,643399954 | 0 |
| ENSMUSG00000034751 | Mast4     | -3,638060093 | 0 |
| ENSMUSG00000074796 | Slc4a11   | -3,635329962 | 0 |
| ENSMUSG00000004044 | Cavin1    | -3,629240036 | 0 |
| ENSMUSG00000030772 | Dkk3      | -3,628560066 | 0 |
| ENSMUSG00000032491 | Nradd     | -3,627619982 | 0 |
| ENSMUSG00000071547 | Nt5dc2    | -3,627439976 | 0 |
| ENSMUSG00000089762 | Ier5l     | -3,60977006  | 0 |
| ENSMUSG00000039116 | Adgrg6    | -3,608259916 | 0 |
| ENSMUSG00000027204 | Fbn1      | -3,603600025 | 0 |
| ENSMUSG00000004105 | Angptl2   | -3,6026299   | 0 |
| ENSMUSG00000024538 | Ppic      | -3,60165     | 0 |
| ENSMUSG00000046731 | Kctd11    | -3,601069927 | 0 |
| ENSMUSG00000018593 | Sparc     | -3,6010499   | 0 |
| ENSMUSG00000042331 | Specc1    | -3,593130112 | 0 |
| ENSMUSG00000027907 | S100a11   | -3,588799953 | 0 |
| ENSMUSG00000029070 | Mxra8     | -3,580470085 | 0 |
| ENSMUSG00000068270 | Shroom4   | -3,573689938 | 0 |
| ENSMUSG00000038860 | Garnl3    | -3,571919918 | 0 |
| ENSMUSG00000059970 | Hspa2     | -3,562629938 | 0 |
| ENSMUSG00000024270 | Slc39a6   | -3,553359985 | 0 |
| ENSMUSG00000003032 | Klf4      | -3,552670002 | 0 |
| ENSMUSG00000015850 | Adamtsl4  | -3,551789999 | 0 |
| ENSMUSG00000039231 | Suv39h1   | -3,548360109 | 0 |
| ENSMUSG00000044017 | Adgrd1    | -3,546689987 | 0 |
| ENSMUSG00000013419 | Zfp651    | -3,543080091 | 0 |
| ENSMUSG00000043421 | Hilpda    | -3,542439938 | 0 |
| ENSMUSG00000048027 | Rgmb      | -3,54053998  | 0 |
| ENSMUSG00000027230 | Creb3l1   | -3,53399992  | 0 |
| ENSMUSG00000064147 | Rab44     | -3,532200098 | 0 |
| ENSMUSG00000027800 | Tm4sf1    | -3,528820038 | 0 |
| ENSMUSG00000062127 | Cttnbp2nl | -3,528510094 | 0 |
| ENSMUSG00000040473 | Cfap69    | -3,527329922 | 0 |
| ENSMUSG00000023088 | Abcc1     | -3,521409988 | 0 |
| ENSMUSG00000038059 | Smim3     | -3,520060062 | 0 |
| ENSMUSG00000038151 | Prdm1     | -3,518899918 | 0 |
| ENSMUSG00000051343 | Rab11fip5 | -3,516949892 | 0 |
| ENSMUSG00000031937 | Vstm5     | -3,5160501   | 0 |
| ENSMUSG00000035105 | Egln3     | -3,516010046 | 0 |
| ENSMUSG00000066456 | Hmgn3     | -3,513900042 | 0 |
| ENSMUSG00000046179 | E2f8      | -3,510689974 | 0 |
| ENSMUSG00000000184 | Ccnd2     | -3,509959936 | 0 |
| ENSMUSG00000050578 | Mmp13     | -3,500030041 | 0 |
| ENSMUSG00000041842 | Fhdc1     | -3,494610071 | 0 |

|                    |           |              |   |
|--------------------|-----------|--------------|---|
| ENSMUSG00000024451 | Arap3     | -3,49052     | 0 |
| ENSMUSG00000068196 | Col8a1    | -3,48732996  | 0 |
| ENSMUSG00000072437 | Nanos1    | -3,484940052 | 0 |
| ENSMUSG00000037606 | Osbp15    | -3,482300043 | 0 |
| ENSMUSG00000057706 | Mex3b     | -3,476619959 | 0 |
| ENSMUSG00000024891 | Slc29a2   | -3,474859953 | 0 |
| ENSMUSG00000042523 | Dnal1     | -3,473370075 | 0 |
| ENSMUSG00000069833 | Ahnak     | -3,471820116 | 0 |
| ENSMUSG00000021725 | Parp8     | -3,470230103 | 0 |
| ENSMUSG00000020241 | Col6a2    | -3,463720083 | 0 |
| ENSMUSG00000020439 | Smtn      | -3,463010073 | 0 |
| ENSMUSG00000028645 | Slc2a1    | -3,460839987 | 0 |
| ENSMUSG00000035107 | Dcbld2    | -3,459599972 | 0 |
| ENSMUSG00000026678 | Rgs5      | -3,456809998 | 0 |
| ENSMUSG00000085795 | Zfp703    | -3,453299999 | 0 |
| ENSMUSG00000020230 | Prmt2     | -3,451960087 | 0 |
| ENSMUSG00000069270 | Hist1h2ac | -3,446019888 | 0 |
| ENSMUSG00000024521 | Pmaip1    | -3,444910049 | 0 |
| ENSMUSG00000037419 | Endod1    | -3,444060087 | 0 |
| ENSMUSG00000028152 | Tspan5    | -3,435470104 | 0 |
| ENSMUSG00000023021 | Cers5     | -3,427759886 | 0 |
| ENSMUSG00000047878 | A4galt    | -3,424940109 | 0 |
| ENSMUSG00000023169 | Slc38a1   | -3,424249887 | 0 |
| ENSMUSG00000007783 | Cpt1c     | -3,419329882 | 0 |
| ENSMUSG00000003865 | Gys1      | -3,418489933 | 0 |
| ENSMUSG00000030022 | Adamts9   | -3,416589975 | 0 |
| ENSMUSG00000056737 | Capg      | -3,413969994 | 0 |
| ENSMUSG00000036777 | Anln      | -3,400069952 | 0 |
| ENSMUSG00000039985 | Sinhcaf   | -3,395169973 | 0 |
| ENSMUSG00000029718 | Pcolce    | -3,392849922 | 0 |
| ENSMUSG00000027456 | Sdcbp2    | -3,389640093 | 0 |
| ENSMUSG00000049866 | Arl4c     | -3,380170107 | 0 |
| ENSMUSG00000026821 | Ralgds    | -3,380110025 | 0 |
| ENSMUSG00000002797 | Ggct      | -3,378770113 | 0 |
| ENSMUSG00000026042 | Col5a2    | -3,374209881 | 0 |
| ENSMUSG00000034271 | Jdp2      | -3,370429993 | 0 |
| ENSMUSG00000035165 | Kcne3     | -3,368530035 | 0 |
| ENSMUSG00000000693 | Loxl3     | -3,363810062 | 0 |
| ENSMUSG00000029126 | Nsg1      | -3,363329887 | 0 |
| ENSMUSG00000026600 | Soat1     | -3,360599995 | 0 |
| ENSMUSG00000040322 | Slc25a24  | -3,360349894 | 0 |
| ENSMUSG00000022043 | Trim35    | -3,352180004 | 0 |
| ENSMUSG00000032640 | Chsy1     | -3,342339993 | 0 |
| ENSMUSG00000032875 | Arhgef17  | -3,339380026 | 0 |
| ENSMUSG00000046743 | Fat4      | -3,337080002 | 0 |
| ENSMUSG00000026786 | Apbb1ip   | -3,323990107 | 0 |
| ENSMUSG00000020785 | Camkk1    | -3,323909998 | 0 |

|                    |           |              |   |
|--------------------|-----------|--------------|---|
| ENSMUSG00000053192 | Mllt11    | -3,321870089 | 0 |
| ENSMUSG00000035357 | Pdzrn3    | -3,318109989 | 0 |
| ENSMUSG00000037892 | Pcdh18    | -3,314470053 | 0 |
| ENSMUSG00000092060 | Bend4     | -3,310519934 | 0 |
| ENSMUSG00000063564 | Col23a1   | -3,307990074 | 0 |
| ENSMUSG00000039903 | Eva1c     | -3,305779934 | 0 |
| ENSMUSG00000004609 | Cd33      | -3,305629969 | 0 |
| ENSMUSG00000050910 | Cdr2l     | -3,304359913 | 0 |
| ENSMUSG00000023039 | Krt7      | -3,303849936 | 0 |
| ENSMUSG00000060600 | Eno3      | -3,296760082 | 0 |
| ENSMUSG00000030878 | Cdr2      | -3,295819998 | 0 |
| ENSMUSG00000032011 | Thy1      | -3,294660091 | 0 |
| ENSMUSG00000047749 | Zc3hav1l  | -3,29260993  | 0 |
| ENSMUSG00000022433 | Csnk1e    | -3,292210102 | 0 |
| ENSMUSG00000050989 | Selenon   | -3,290479898 | 0 |
| ENSMUSG00000040663 | Clcf1     | -3,289510012 | 0 |
| ENSMUSG00000053198 | Prx       | -3,287549973 | 0 |
| ENSMUSG00000038587 | Akap12    | -3,28625989  | 0 |
| ENSMUSG00000026826 | Nr4a2     | -3,281830072 | 0 |
| ENSMUSG00000067377 | Tspan6    | -3,279740095 | 0 |
| ENSMUSG00000022474 | Pmm1      | -3,269579887 | 0 |
| ENSMUSG00000012017 | Scarf2    | -3,267889977 | 0 |
| ENSMUSG00000027435 | Cd93      | -3,255209923 | 0 |
| ENSMUSG00000037032 | Apbb1     | -3,236520052 | 0 |
| ENSMUSG00000039153 | Runx2     | -3,234719992 | 0 |
| ENSMUSG00000017969 | Ptgis     | -3,23368001  | 0 |
| ENSMUSG00000019916 | P4ha1     | -3,227119923 | 0 |
| ENSMUSG00000030759 | Far1      | -3,218780041 | 0 |
| ENSMUSG00000031557 | Plekha2   | -3,201879978 | 0 |
| ENSMUSG00000060147 | Serpinb6a | -3,198349953 | 0 |
| ENSMUSG00000026110 | Mgat4a    | -3,188879967 | 0 |
| ENSMUSG00000046532 | Ar        | -3,17956996  | 0 |
| ENSMUSG00000037868 | Egr2      | -3,178659916 | 0 |
| ENSMUSG00000068335 | Dok1      | -3,176009893 | 0 |
| ENSMUSG00000006219 | Fblim1    | -3,165659904 | 0 |
| ENSMUSG00000032740 | Ccdc88a   | -3,158440113 | 0 |
| ENSMUSG00000007655 | Cav1      | -3,150660038 | 0 |
| ENSMUSG00000028047 | Thbs3     | -3,145230055 | 0 |
| ENSMUSG00000019997 | Ctgf      | -3,142290115 | 0 |
| ENSMUSG00000029675 | Eln       | -3,141069889 | 0 |
| ENSMUSG00000029283 | Cdc7      | -3,139790058 | 0 |
| ENSMUSG00000055320 | Tead1     | -3,139309883 | 0 |
| ENSMUSG00000053137 | Mapk11    | -3,131900072 | 0 |
| ENSMUSG00000043542 | Zc2hc1a   | -3,131400108 | 0 |
| ENSMUSG00000020399 | Havcr2    | -3,126820087 | 0 |
| ENSMUSG00000031808 | Slc27a1   | -3,118900061 | 0 |
| ENSMUSG00000050271 | Prag1     | -3,118860006 | 0 |

|                    |          |              |   |
|--------------------|----------|--------------|---|
| ENSMUSG00000040711 | Sh3pxd2b | -3,113579988 | 0 |
| ENSMUSG00000018378 | Cuedc1   | -3,111829996 | 0 |
| ENSMUSG00000034394 | Lif      | -3,100229979 | 0 |
| ENSMUSG00000044367 | Slc16a13 | -3,095609903 | 0 |
| ENSMUSG00000020231 | Dip2a    | -3,090679884 | 0 |
| ENSMUSG00000039137 | Whrn     | -3,090509892 | 0 |
| ENSMUSG00000031750 | Il34     | -3,077660084 | 0 |
| ENSMUSG00000031803 | B3gnt3   | -3,071680069 | 0 |
| ENSMUSG00000035900 | Gramd4   | -3,070100069 | 0 |
| ENSMUSG00000044864 | Ankrd50  | -3,065370083 | 0 |
| ENSMUSG00000030786 | Itgam    | -3,054990053 | 0 |
| ENSMUSG00000031093 | Dock11   | -3,051110029 | 0 |
| ENSMUSG00000062825 | Actg1    | -3,049789906 | 0 |
| ENSMUSG00000013033 | Adgr1    | -3,039809942 | 0 |
| ENSMUSG00000003573 | Homer3   | -3,038800001 | 0 |
| ENSMUSG00000033420 | Antxr1   | -3,037820101 | 0 |
| ENSMUSG00000031503 | Col4a2   | -3,037450075 | 0 |
| ENSMUSG00000027848 | Olfml3   | -3,033210039 | 0 |
| ENSMUSG00000029484 | Anxa3    | -3,031869888 | 0 |
| ENSMUSG00000016262 | Sertad4  | -3,021330118 | 0 |
| ENSMUSG00000040183 | Ankrd6   | -3,019979954 | 0 |
| ENSMUSG00000045165 | Al467606 | -3,005259991 | 0 |
| ENSMUSG00000031274 | Col4a5   | -3,000790119 | 0 |
| ENSMUSG00000027669 | Gnb4     | -2,993910074 | 0 |
| ENSMUSG00000036902 | Neto2    | -2,98781991  | 0 |
| ENSMUSG00000060594 | Layn     | -2,98307991  | 0 |
| ENSMUSG00000030782 | Tgfb1i1  | -2,979330063 | 0 |
| ENSMUSG00000013076 | Amot1    | -2,978879929 | 0 |
| ENSMUSG00000036545 | Adamts2  | -2,976569891 | 0 |
| ENSMUSG00000031758 | Cdyl2    | -2,975869894 | 0 |
| ENSMUSG00000023191 | P3h3     | -2,974539995 | 0 |
| ENSMUSG00000027611 | Procr    | -2,973040104 | 0 |
| ENSMUSG00000022057 | Adamdec1 | -2,972850084 | 0 |
| ENSMUSG00000030189 | Ybx3     | -2,966320038 | 0 |
| ENSMUSG00000055675 | Kbtbd11  | -2,965130091 | 0 |
| ENSMUSG0000002006  | Pdzd4    | -2,949039936 | 0 |
| ENSMUSG00000015053 | Gata2    | -2,947609901 | 0 |
| ENSMUSG00000074743 | Thbd     | -2,94671011  | 0 |
| ENSMUSG00000028926 | Cdk14    | -2,944469929 | 0 |
| ENSMUSG00000039953 | Clstn1   | -2,942859888 | 0 |
| ENSMUSG00000038807 | Rap1gap2 | -2,941600084 | 0 |
| ENSMUSG00000039556 | Ppp1r3f  | -2,934700012 | 0 |
| ENSMUSG00000007041 | Clic1    | -2,929729939 | 0 |
| ENSMUSG00000034595 | Ppp1r18  | -2,924580097 | 0 |
| ENSMUSG00000031965 | Tbx20    | -2,922139883 | 0 |
| ENSMUSG00000061048 | Cdh3     | -2,921869993 | 0 |
| ENSMUSG00000009418 | Nav1     | -2,916270018 | 0 |



|                    |          |              |   |
|--------------------|----------|--------------|---|
| ENSMUSG00000047945 | Marcksl1 | -2,914900064 | 0 |
| ENSMUSG00000048126 | Col6a3   | -2,900949955 | 0 |
| ENSMUSG00000042616 | Oscp1    | -2,897010088 | 0 |
| ENSMUSG00000021065 | Fut8     | -2,895339966 | 0 |
| ENSMUSG00000037972 | Snn      | -2,892750025 | 0 |
| ENSMUSG00000024597 | Slc12a2  | -2,890589952 | 0 |
| ENSMUSG00000057335 | Cep170   | -2,887130022 | 0 |
| ENSMUSG00000074305 | Peak1    | -2,885050058 | 0 |
| ENSMUSG00000002602 | Axl      | -2,877449989 | 0 |
| ENSMUSG00000058881 | Zfp516   | -2,876209974 | 0 |
| ENSMUSG00000063605 | Ccdc102a | -2,874030113 | 0 |
| ENSMUSG00000040010 | Slc7a5   | -2,869699955 | 0 |
| ENSMUSG00000026558 | Uck2     | -2,867980003 | 0 |
| ENSMUSG00000038702 | Dsel     | -2,85491991  | 0 |
| ENSMUSG00000030683 | Sez6l2   | -2,853899956 | 0 |
| ENSMUSG00000046982 | Tshz1    | -2,850650072 | 0 |
| ENSMUSG00000026556 | Vangl2   | -2,845279932 | 0 |
| ENSMUSG00000000555 | Itga5    | -2,840600014 | 0 |
| ENSMUSG00000027030 | Stk39    | -2,836819887 | 0 |
| ENSMUSG00000028339 | Col15a1  | -2,831609964 | 0 |
| ENSMUSG00000034863 | Ano8     | -2,831029892 | 0 |
| ENSMUSG00000026748 | Plxdc2   | -2,830660105 | 0 |
| ENSMUSG00000029915 | Clec5a   | -2,829740047 | 0 |
| ENSMUSG00000005124 | Wisp1    | -2,827970028 | 0 |
| ENSMUSG00000089715 | Cbx6     | -2,818619967 | 0 |
| ENSMUSG00000022346 | Myc      | -2,813270092 | 0 |
| ENSMUSG00000026797 | Stxbp1   | -2,803600073 | 0 |
| ENSMUSG00000002489 | Tiam1    | -2,802419901 | 0 |
| ENSMUSG00000000420 | Galnt1   | -2,790260077 | 0 |
| ENSMUSG00000031149 | Praf2    | -2,787139893 | 0 |
| ENSMUSG00000019823 | Mical1   | -2,785919905 | 0 |
| ENSMUSG00000030084 | Plxna1   | -2,779880047 | 0 |
| ENSMUSG00000047557 | Lxn      | -2,77876997  | 0 |
| ENSMUSG00000025608 | Podxl    | -2,772500038 | 0 |
| ENSMUSG00000026657 | Frmd4a   | -2,768440008 | 0 |
| ENSMUSG00000024063 | Lbh      | -2,76770997  | 0 |
| ENSMUSG00000027510 | Rbm38    | -2,766849995 | 0 |
| ENSMUSG00000078202 | Nrarp    | -2,765980005 | 0 |
| ENSMUSG00000031502 | Col4a1   | -2,763250113 | 0 |
| ENSMUSG00000020846 | Rflnb    | -2,762059927 | 0 |
| ENSMUSG00000039328 | Rnf122   | -2,75996995  | 0 |
| ENSMUSG00000002257 | Def6     | -2,759870052 | 0 |
| ENSMUSG00000028108 | Ecm1     | -2,755630016 | 0 |
| ENSMUSG00000024736 | Tmem132a | -2,746599913 | 0 |
| ENSMUSG00000029648 | Flt1     | -2,745620012 | 0 |
| ENSMUSG00000036599 | Chst12   | -2,744950056 | 0 |
| ENSMUSG00000034220 | Gpc1     | -2,74484992  | 0 |

|                    |               |              |   |
|--------------------|---------------|--------------|---|
| ENSMUSG0000002228  | Ppm1j         | -2,744349957 | 0 |
| ENSMUSG00000041801 | Phlda3        | -2,744299889 | 0 |
| ENSMUSG00000026875 | Traf1         | -2,740200043 | 0 |
| ENSMUSG00000029762 | Akr1b8        | -2,736320019 | 0 |
| ENSMUSG00000050721 | Plekho2       | -2,735470057 | 0 |
| ENSMUSG00000025969 | Nrp2          | -2,731960058 | 0 |
| ENSMUSG00000059901 | Adamts14      | -2,728490114 | 0 |
| ENSMUSG00000034685 | Fam171a2      | -2,716609955 | 0 |
| ENSMUSG00000048285 | Frmd6         | -2,714550018 | 0 |
| ENSMUSG00000054720 | Lrrc8c        | -2,71446991  | 0 |
| ENSMUSG00000035232 | Pdk3          | -2,713269949 | 0 |
| ENSMUSG00000033066 | Gas7          | -2,706949949 | 0 |
| ENSMUSG00000023009 | Nckap5l       | -2,692090034 | 0 |
| ENSMUSG00000029174 | Tbc1d1        | -2,687330008 | 0 |
| ENSMUSG00000042644 | Itpr3         | -2,686650038 | 0 |
| ENSMUSG00000059713 | Rcan3         | -2,684060097 | 0 |
| ENSMUSG00000024053 | Emilin2       | -2,683079958 | 0 |
| ENSMUSG00000031608 | Galnt7        | -2,677380085 | 0 |
| ENSMUSG00000032470 | Mras          | -2,676450014 | 0 |
| ENSMUSG00000024556 | Me2           | -2,673599958 | 0 |
| ENSMUSG00000036158 | Prickle1      | -2,656009912 | 0 |
| ENSMUSG00000042156 | Dzip1         | -2,653670073 | 0 |
| ENSMUSG00000020547 | Bzw2          | -2,652349949 | 0 |
| ENSMUSG00000021608 | Lpcat1        | -2,651740074 | 0 |
| ENSMUSG00000020689 | Itgb3         | -2,649509907 | 0 |
| ENSMUSG00000019214 | Chtf18        | -2,629110098 | 0 |
| ENSMUSG00000023036 | Pcdhgc4       | -2,627010107 | 0 |
| ENSMUSG00000028532 | Cachd1        | -2,622179985 | 0 |
| ENSMUSG00000053080 | 2700081O15Rik | -2,617789984 | 0 |
| ENSMUSG00000042694 | Stn1          | -2,616650105 | 0 |
| ENSMUSG00000034401 | Spata6        | -2,616430044 | 0 |
| ENSMUSG00000005973 | Rcn1          | -2,616110086 | 0 |
| ENSMUSG00000037408 | Cnnm4         | -2,61435008  | 0 |
| ENSMUSG00000025986 | Slc39a10      | -2,613270044 | 0 |
| ENSMUSG00000008398 | Elk3          | -2,61303997  | 0 |
| ENSMUSG00000024462 | Gabbr1        | -2,606230021 | 0 |
| ENSMUSG00000039103 | Nexn          | -2,601890087 | 0 |
| ENSMUSG00000002603 | Tgfb1         | -2,596990108 | 0 |
| ENSMUSG00000068735 | Trp53i11      | -2,592869997 | 0 |
| ENSMUSG00000031066 | Usp11         | -2,588129997 | 0 |
| ENSMUSG00000026566 | Mpzl1         | -2,585860014 | 0 |
| ENSMUSG00000001082 | Mfsd10        | -2,578569889 | 0 |
| ENSMUSG00000019699 | Akt3          | -2,575309992 | 0 |
| ENSMUSG00000026646 | Suv39h2       | -2,574939966 | 0 |
| ENSMUSG00000029207 | Apbb2         | -2,571130037 | 0 |
| ENSMUSG00000042688 | Mapk6         | -2,565609932 | 0 |
| ENSMUSG00000028763 | Hspg2         | -2,560750008 | 0 |

|                    |           |              |   |
|--------------------|-----------|--------------|---|
| ENSMUSG00000038679 | Trps1     | -2,559540033 | 0 |
| ENSMUSG00000010142 | Tnfrsf13b | -2,556529999 | 0 |
| ENSMUSG00000064210 | Ano6      | -2,552649975 | 0 |
| ENSMUSG00000056220 | Pla2g4a   | -2,549429893 | 0 |
| ENSMUSG00000003500 | Impdh1    | -2,546969891 | 0 |
| ENSMUSG00000032449 | Slc25a36  | -2,543629885 | 0 |
| ENSMUSG00000040690 | Col16a1   | -2,539139986 | 0 |
| ENSMUSG00000020160 | Meis1     | -2,537630081 | 0 |
| ENSMUSG00000025880 | Smad7     | -2,520349979 | 0 |
| ENSMUSG00000009585 | Apobec3   | -2,519779921 | 0 |
| ENSMUSG00000031875 | Cmtm3     | -2,51857996  | 0 |
| ENSMUSG00000034254 | Agpat1    | -2,513030052 | 0 |
| ENSMUSG00000031749 | St3gal2   | -2,510499954 | 0 |
| ENSMUSG00000052698 | Tln2      | -2,500950098 | 0 |
| ENSMUSG00000026596 | Abl2      | -2,500740051 | 0 |
| ENSMUSG00000071661 | Zbtb3     | -2,492939949 | 0 |
| ENSMUSG00000038042 | Ptpdc1    | -2,491250038 | 0 |
| ENSMUSG00000034640 | Tiparp    | -2,489409924 | 0 |
| ENSMUSG00000039607 | Rbms3     | -2,489109993 | 0 |
| ENSMUSG00000018334 | Ksr1      | -2,487119913 | 0 |
| ENSMUSG00000026249 | Serpine2  | -2,485850096 | 0 |
| ENSMUSG00000040339 | Fam102b   | -2,473769903 | 0 |
| ENSMUSG00000024301 | Kifc5b    | -2,473119974 | 0 |
| ENSMUSG00000062210 | Tnfaip8   | -2,471149921 | 0 |
| ENSMUSG00000016526 | Dyrk3     | -2,468060017 | 0 |
| ENSMUSG00000026074 | Map4k4    | -2,466389894 | 0 |
| ENSMUSG00000029135 | Fosl2     | -2,452680111 | 0 |
| ENSMUSG00000041594 | Tmtc4     | -2,451780081 | 0 |
| ENSMUSG00000001473 | Tubb6     | -2,445159912 | 0 |
| ENSMUSG00000052688 | Rab7b     | -2,441900015 | 0 |
| ENSMUSG00000061411 | Nol4l     | -2,440380096 | 0 |
| ENSMUSG00000031990 | Jam3      | -2,439970016 | 0 |
| ENSMUSG00000048997 | Atxn7l2   | -2,435980082 | 0 |
| ENSMUSG00000031565 | Fgfr1     | -2,433480024 | 0 |
| ENSMUSG00000000531 | Grasp     | -2,429780006 | 0 |
| ENSMUSG00000017631 | Abr       | -2,425980091 | 0 |
| ENSMUSG00000057969 | Sema3b    | -2,423549891 | 0 |
| ENSMUSG00000019979 | Apaf1     | -2,412580013 | 0 |
| ENSMUSG00000020099 | Unc5b     | -2,412430048 | 0 |
| ENSMUSG00000036446 | Lum       | -2,409569979 | 0 |
| ENSMUSG00000018398 | Sept8     | -2,408679962 | 0 |
| ENSMUSG00000066877 | Nck2      | -2,398459911 | 0 |
| ENSMUSG00000062312 | ErbB2     | -2,397809982 | 0 |
| ENSMUSG00000075284 | Wipf1     | -2,39496994  | 0 |
| ENSMUSG00000031103 | Elf4      | -2,382849932 | 0 |
| ENSMUSG00000052911 | Lamb2     | -2,378580093 | 0 |
| ENSMUSG00000032231 | Anxa2     | -2,375240088 | 0 |

|                    |          |              |   |
|--------------------|----------|--------------|---|
| ENSMUSG00000036825 | Ssx2ip   | -2,374249935 | 0 |
| ENSMUSG00000026525 | Opn3     | -2,369750023 | 0 |
| ENSMUSG00000048537 | Phldb1   | -2,367079973 | 0 |
| ENSMUSG00000015745 | Plekho1  | -2,363169909 | 0 |
| ENSMUSG00000071708 | Sms      | -2,361180067 | 0 |
| ENSMUSG00000050530 | Fam171a1 | -2,358789921 | 0 |
| ENSMUSG00000021831 | Ero1l    | -2,357500076 | 0 |
| ENSMUSG00000049288 | Lix1l    | -2,355590105 | 0 |
| ENSMUSG00000036667 | Tcaf1    | -2,345969915 | 0 |
| ENSMUSG00000051950 | B3glct   | -2,344959974 | 0 |
| ENSMUSG00000021493 | Pdlim7   | -2,344399929 | 0 |
| ENSMUSG00000054364 | Rhob     | -2,343430042 | 0 |
| ENSMUSG00000001507 | Itga3    | -2,340850115 | 0 |
| ENSMUSG00000049191 | Rtl5     | -2,337650061 | 0 |
| ENSMUSG00000020814 | Mxra7    | -2,337549925 | 0 |
| ENSMUSG00000035493 | Tgfbi    | -2,336950064 | 0 |
| ENSMUSG00000022893 | Adamts1  | -2,329289913 | 0 |
| ENSMUSG00000001768 | Rin2     | -2,3285501   | 0 |
| ENSMUSG00000022894 | Adamts5  | -2,327960014 | 0 |
| ENSMUSG00000069114 | Zbtb10   | -2,326879978 | 0 |
| ENSMUSG00000036894 | Rap2b    | -2,325609922 | 0 |
| ENSMUSG00000036672 | Cenpt    | -2,324899912 | 0 |
| ENSMUSG00000030265 | Kras     | -2,317879915 | 0 |
| ENSMUSG00000030536 | Iqgap1   | -2,307240009 | 0 |
| ENSMUSG00000029674 | Limk1    | -2,298609972 | 0 |
| ENSMUSG00000020657 | Dnajc27  | -2,287329912 | 0 |
| ENSMUSG00000031616 | Ednra    | -2,283010006 | 0 |
| ENSMUSG00000026094 | Stk17b   | -2,282380104 | 0 |
| ENSMUSG00000022070 | Bora     | -2,279829979 | 0 |
| ENSMUSG00000027635 | Dsn1     | -2,278970003 | 0 |
| ENSMUSG00000032320 | Rcn2     | -2,275279999 | 0 |
| ENSMUSG00000021365 | Nedd9    | -2,273020029 | 0 |
| ENSMUSG00000029231 | Pdgfra   | -2,27241993  | 0 |
| ENSMUSG00000024579 | Pcyox1l  | -2,270629883 | 0 |
| ENSMUSG00000040751 | Lat2     | -2,269880056 | 0 |
| ENSMUSG0000004508  | Gab2     | -2,267509937 | 0 |
| ENSMUSG00000027004 | Frzb     | -2,265710115 | 0 |
| ENSMUSG00000001918 | Slc1a5   | -2,261049986 | 0 |
| ENSMUSG00000032431 | Crtap    | -2,254760027 | 0 |
| ENSMUSG00000019467 | Arhgef25 | -2,243860006 | 0 |
| ENSMUSG00000021693 | Kif2a    | -2,241219997 | 0 |
| ENSMUSG00000022358 | Fbxo32   | -2,234100103 | 0 |
| ENSMUSG00000031843 | Mphosph6 | -2,233659983 | 0 |
| ENSMUSG00000031253 | Srpx2    | -2,23258996  | 0 |
| ENSMUSG00000057193 | Slc44a2  | -2,231129885 | 0 |
| ENSMUSG00000006445 | Epha2    | -2,228960037 | 0 |
| ENSMUSG00000059173 | Pde1a    | -2,225300074 | 0 |

|                    |          |              |   |
|--------------------|----------|--------------|---|
| ENSMUSG0000004947  | Dtx2     | -2,221930027 | 0 |
| ENSMUSG00000028195 | Cyr61    | -2,216969967 | 0 |
| ENSMUSG00000028214 | Gem      | -2,213649988 | 0 |
| ENSMUSG00000052331 | Ankrd44  | -2,210000038 | 0 |
| ENSMUSG00000036459 | Wtip     | -2,208139896 | 0 |
| ENSMUSG00000014778 | Fhod1    | -2,201570034 | 0 |
| ENSMUSG00000056515 | Rab31    | -2,198760033 | 0 |
| ENSMUSG00000019461 | Plscr3   | -2,196969986 | 0 |
| ENSMUSG00000053965 | Pde5a    | -2,191499949 | 0 |
| ENSMUSG00000028480 | Glipr2   | -2,190129995 | 0 |
| ENSMUSG00000039824 | Myl6b    | -2,189879894 | 0 |
| ENSMUSG00000023066 | Rttn     | -2,181809902 | 0 |
| ENSMUSG00000053746 | Pthr1    | -2,180399895 | 0 |
| ENSMUSG00000037148 | Arhgap10 | -2,175909996 | 0 |
| ENSMUSG00000039781 | Cep131   | -2,174200058 | 0 |
| ENSMUSG00000021843 | Ktn1     | -2,169569969 | 0 |
| ENSMUSG00000031885 | Cbfb     | -2,165019989 | 0 |
| ENSMUSG00000029385 | Ccng2    | -2,162339926 | 0 |
| ENSMUSG00000037104 | Socs5    | -2,160219908 | 0 |
| ENSMUSG00000037111 | Setd7    | -2,158449888 | 0 |
| ENSMUSG00000022565 | Plec     | -2,157210112 | 0 |
| ENSMUSG00000041420 | Meis3    | -2,15692997  | 0 |
| ENSMUSG00000020176 | Grb10    | -2,145040035 | 0 |
| ENSMUSG00000042225 | Ammecr1  | -2,144490004 | 0 |
| ENSMUSG00000027864 | Ptgrn    | -2,136270046 | 0 |
| ENSMUSG00000048490 | Nrip1    | -2,135580063 | 0 |
| ENSMUSG00000035342 | Lzts2    | -2,132689953 | 0 |
| ENSMUSG00000039191 | Rbpj     | -2,128750086 | 0 |
| ENSMUSG00000028059 | Arhgef2  | -2,122309923 | 0 |
| ENSMUSG00000022186 | Oxct1    | -2,12210989  | 0 |
| ENSMUSG00000062373 | Tmem65   | -2,116029978 | 0 |
| ENSMUSG00000002458 | Rgs19    | -2,104360104 | 0 |
| ENSMUSG00000027490 | E2f1     | -2,103650093 | 0 |
| ENSMUSG00000019975 | Ikbip    | -2,102900028 | 0 |
| ENSMUSG00000042215 | Bag2     | -2,097640038 | 0 |
| ENSMUSG00000016946 | Kctd5    | -2,092339993 | 0 |
| ENSMUSG00000019966 | Kitl     | -2,092080116 | 0 |
| ENSMUSG00000021288 | Klc1     | -2,087680101 | 0 |
| ENSMUSG00000027087 | Itgav    | -2,080329895 | 0 |
| ENSMUSG00000021068 | Nin      | -2,079210043 | 0 |
| ENSMUSG00000031486 | Adgra2   | -2,074239969 | 0 |
| ENSMUSG00000025809 | Itgb1    | -2,061460018 | 0 |
| ENSMUSG00000002289 | Angptl4  | -2,055789948 | 0 |
| ENSMUSG00000082361 | Btc      | -2,052649975 | 0 |
| ENSMUSG00000036745 | Ttll7    | -2,05024004  | 0 |
| ENSMUSG00000029392 | Rilpl1   | -2,05024004  | 0 |
| ENSMUSG00000010067 | Rassf1   | -2,048540115 | 0 |

|                    |         |              |   |
|--------------------|---------|--------------|---|
| ENSMUSG00000043099 | Hic1    | -2,048269987 | 0 |
| ENSMUSG00000073771 | Btbd19  | -2,046099901 | 0 |
| ENSMUSG00000037933 | Bicd2   | -2,043250084 | 0 |
| ENSMUSG00000039697 | Ncoa7   | -2,040770054 | 0 |
| ENSMUSG00000048332 | Lhfp    | -2,039580107 | 0 |
| ENSMUSG00000026121 | Sema4c  | -2,026629925 | 0 |
| ENSMUSG00000030254 | Rad18   | -2,026319981 | 0 |
| ENSMUSG00000038456 | Dennd2a | -2,016860008 | 0 |
| ENSMUSG00000031367 | Ap1s2   | -2,01541996  | 0 |
| ENSMUSG00000041707 | Tmem273 | -2,011940002 | 0 |
| ENSMUSG00000020536 | Lgl1    | -2,008399963 | 0 |
| ENSMUSG00000039384 | Dusp10  | -2,007070065 | 0 |
| ENSMUSG00000021569 | Trip13  | -1,999439955 | 0 |
| ENSMUSG00000005802 | Slc30a4 | -1,99714005  | 0 |
| ENSMUSG00000022436 | Sh3bp1  | -1,995100021 | 0 |
| ENSMUSG00000074916 | Chst14  | -1,989910007 | 0 |
| ENSMUSG00000020601 | Trib2   | -1,988819957 | 0 |
| ENSMUSG00000032340 | Neo1    | -1,984079957 | 0 |
| ENSMUSG00000021109 | Hif1a   | -1,983669996 | 0 |
| ENSMUSG00000069662 | Marcks  | -1,980720043 | 0 |
| ENSMUSG00000015944 | Castor2 | -1,973350048 | 0 |
| ENSMUSG00000047022 | Mipol1  | -1,973270059 | 0 |
| ENSMUSG00000024691 | Fam111a | -1,971979976 | 0 |
| ENSMUSG00000030539 | Sema4b  | -1,967270017 | 0 |
| ENSMUSG00000066278 | Vps37b  | -1,966510057 | 0 |
| ENSMUSG00000001034 | Mapk7   | -1,960800052 | 0 |
| ENSMUSG00000024970 | Spindoc | -1,955749989 | 0 |
| ENSMUSG00000028073 | Pear1   | -1,954480052 | 0 |
| ENSMUSG00000036968 | Cnpy4   | -1,951979995 | 0 |
| ENSMUSG00000031375 | Bgn     | -1,951589942 | 0 |
| ENSMUSG00000036565 | Ttyh3   | -1,939450026 | 0 |
| ENSMUSG00000033032 | Afap1l1 | -1,93780005  | 0 |
| ENSMUSG00000052534 | Pbx1    | -1,93362999  | 0 |
| ENSMUSG00000058013 | Sept11  | -1,931339979 | 0 |
| ENSMUSG00000037306 | Man1c1  | -1,927639961 | 0 |
| ENSMUSG00000012296 | Tjap1   | -1,915820003 | 0 |
| ENSMUSG00000027293 | Ehd4    | -1,915269971 | 0 |
| ENSMUSG00000060166 | Zdhhc8  | -1,909790039 | 0 |
| ENSMUSG00000022335 | Zfat    | -1,908740044 | 0 |
| ENSMUSG00000032366 | Tpm1    | -1,905050039 | 0 |
| ENSMUSG00000006800 | Sulf2   | -1,903180003 | 0 |
| ENSMUSG00000019261 | Map1s   | -1,902590036 | 0 |
| ENSMUSG00000073678 | Pgap1   | -1,900930047 | 0 |
| ENSMUSG00000018001 | Cyth3   | -1,900220037 | 0 |
| ENSMUSG00000029413 | Naaa    | -1,899749994 | 0 |
| ENSMUSG00000052852 | Reep1   | -1,898820043 | 0 |
| ENSMUSG00000032280 | Tle3    | -1,898599982 | 0 |

|                     |               |              |   |
|---------------------|---------------|--------------|---|
| ENSMUSG00000026643  | Nmt2          | -1,898229957 | 0 |
| ENSMUSG00000000078  | Klf6          | -1,896139979 | 0 |
| ENSMUSG00000021733  | Slc4a7        | -1,893640041 | 0 |
| ENSMUSG000000047747 | Rnf150        | -1,892940044 | 0 |
| ENSMUSG000000052798 | Nup107        | -1,892429948 | 0 |
| ENSMUSG000000032666 | 1700025G04Rik | -1,891649961 | 0 |
| ENSMUSG000000024590 | Lmnb1         | -1,884770036 | 0 |
| ENSMUSG000000029687 | Ezh2          | -1,883550048 | 0 |
| ENSMUSG000000026790 | Odf2          | -1,881680012 | 0 |
| ENSMUSG000000004562 | Arhgef40      | -1,880730033 | 0 |
| ENSMUSG000000062098 | Btdb3         | -1,876479983 | 0 |
| ENSMUSG000000031453 | Rasa3         | -1,876289964 | 0 |
| ENSMUSG000000027750 | Postn         | -1,86796999  | 0 |
| ENSMUSG000000038252 | Ncapd2        | -1,863489985 | 0 |
| ENSMUSG000000024620 | Pdgfrb        | -1,859650016 | 0 |
| ENSMUSG000000039178 | Tbc1d19       | -1,853809953 | 0 |
| ENSMUSG000000006728 | Cdk4          | -1,851330042 | 0 |
| ENSMUSG000000040734 | Ppp1r13l      | -1,836949944 | 0 |
| ENSMUSG000000028126 | Pip5k1a       | -1,83694005  | 0 |
| ENSMUSG000000031508 | Ankrd10       | -1,833580017 | 0 |
| ENSMUSG000000035722 | Abca7         | -1,827849984 | 0 |
| ENSMUSG000000029033 | Acap3         | -1,826660037 | 0 |
| ENSMUSG000000048376 | F2r           | -1,824390054 | 0 |
| ENSMUSG000000024777 | Ppp2r5b       | -1,820580006 | 0 |
| ENSMUSG000000032384 | Csnk1g1       | -1,817659974 | 0 |
| ENSMUSG000000021067 | Sav1          | -1,813979983 | 0 |
| ENSMUSG000000025025 | Mxi1          | -1,797099948 | 0 |
| ENSMUSG000000040511 | Pvr           | -1,796210051 | 0 |
| ENSMUSG000000019978 | Epb41l2       | -1,795240045 | 0 |
| ENSMUSG000000024666 | Tmem138       | -1,794430017 | 0 |
| ENSMUSG000000025348 | Itga7         | -1,789459944 | 0 |
| ENSMUSG000000027339 | Rassf2        | -1,785580039 | 0 |
| ENSMUSG000000026335 | Pam           | -1,782799959 | 0 |
| ENSMUSG000000020453 | Patz1         | -1,782379985 | 0 |
| ENSMUSG000000019487 | Trip10        | -1,772420049 | 0 |
| ENSMUSG000000047832 | Cdca4         | -1,772220016 | 0 |
| ENSMUSG000000058587 | Tmod3         | -1,770329952 | 0 |
| ENSMUSG000000001441 | Npepps        | -1,765759945 | 0 |
| ENSMUSG000000004383 | Large1        | -1,752740026 | 0 |
| ENSMUSG000000090394 | 4930523C07Rik | -1,751829982 | 0 |
| ENSMUSG000000024960 | Plcb3         | -1,75098002  | 0 |
| ENSMUSG000000049532 | Sall2         | -1,745900035 | 0 |
| ENSMUSG000000037788 | Vopp1         | -1,744259953 | 0 |
| ENSMUSG000000041040 | Fam117b       | -1,743780017 | 0 |
| ENSMUSG000000026585 | Kifap3        | -1,741019964 | 0 |
| ENSMUSG000000040488 | Ltbp4         | -1,74048996  | 0 |
| ENSMUSG000000011877 | Git1          | -1,738710046 | 0 |



|                    |          |              |   |
|--------------------|----------|--------------|---|
| ENSMUSG00000031787 | Katnb1   | -1,736670017 | 0 |
| ENSMUSG00000035713 | Usp35    | -1,734009981 | 0 |
| ENSMUSG00000001525 | Tubb5    | -1,730419993 | 0 |
| ENSMUSG00000024824 | Rad9a    | -1,721680045 | 0 |
| ENSMUSG00000002297 | Dbf4     | -1,72021997  | 0 |
| ENSMUSG00000022265 | Ank      | -1,717260003 | 0 |
| ENSMUSG00000047989 | Ino80c   | -1,711519957 | 0 |
| ENSMUSG00000040631 | Dok4     | -1,704599977 | 0 |
| ENSMUSG00000030245 | Golt1b   | -1,698519945 | 0 |
| ENSMUSG00000027405 | Nop56    | -1,691239953 | 0 |
| ENSMUSG00000052752 | Traf7    | -1,689659953 | 0 |
| ENSMUSG00000026627 | Tmem206  | -1,684239984 | 0 |
| ENSMUSG00000032477 | Cdc25a   | -1,659890056 | 0 |
| ENSMUSG00000054693 | Adam10   | -1,654160023 | 0 |
| ENSMUSG00000009035 | Tmem184b | -1,651090026 | 0 |
| ENSMUSG00000017715 | Pgs1     | -1,651059985 | 0 |
| ENSMUSG00000021701 | Plk2     | -1,650519967 | 0 |
| ENSMUSG00000039316 | Rftn1    | -1,64665997  | 0 |
| ENSMUSG00000002885 | Adgre5   | -1,637660027 | 0 |
| ENSMUSG00000021113 | Snapc1   | -1,623639941 | 0 |
| ENSMUSG00000046434 | Hnrnpa1  | -1,622609973 | 0 |
| ENSMUSG00000038047 | Haus6    | -1,620579958 | 0 |
| ENSMUSG00000031520 | Vegfc    | -1,604089975 | 0 |
| ENSMUSG00000030811 | Fbxl19   | -1,603850007 | 0 |
| ENSMUSG00000068566 | Myadm    | -1,602769971 | 0 |
| ENSMUSG00000026519 | Tmem63a  | -1,595759988 | 0 |
| ENSMUSG00000025268 | Maged2   | -1,593670011 | 0 |
| ENSMUSG00000027852 | Nras     | -1,589699984 | 0 |
| ENSMUSG00000026933 | Camsap1  | -1,586869955 | 0 |
| ENSMUSG00000019256 | Ahr      | -1,585150003 | 0 |
| ENSMUSG00000024952 | Rps6ka4  | -1,584759951 | 0 |
| ENSMUSG00000024498 | Tcerg1   | -1,583979964 | 0 |
| ENSMUSG00000032714 | Syde1    | -1,575760007 | 0 |
| ENSMUSG00000036990 | Otud4    | -1,572960019 | 0 |
| ENSMUSG00000066621 | Tecpr1   | -1,572569966 | 0 |
| ENSMUSG00000037570 | Mcrs1    | -1,566759944 | 0 |
| ENSMUSG00000038822 | Hace1    | -1,558940053 | 0 |
| ENSMUSG00000024851 | Pitpnm1  | -1,55855     | 0 |
| ENSMUSG00000027381 | Bcl2l11  | -1,557739973 | 0 |
| ENSMUSG00000023008 | Fmnl3    | -1,557100058 | 0 |
| ENSMUSG00000034485 | Uaca     | -1,554669976 | 0 |
| ENSMUSG00000026134 | Prim2    | -1,55171001  | 0 |
| ENSMUSG00000002105 | Slc39a13 | -1,546959996 | 0 |
| ENSMUSG00000021003 | Galc     | -1,538319945 | 0 |
| ENSMUSG00000022150 | Dab2     | -1,53678     | 0 |
| ENSMUSG00000022098 | Bmp1     | -1,530329943 | 0 |
| ENSMUSG00000035529 | Prdm4    | -1,525949955 | 0 |

|                    |               |              |   |
|--------------------|---------------|--------------|---|
| ENSMUSG00000029171 | Pgm2          | -1,525740027 | 0 |
| ENSMUSG00000027803 | Wwtr1         | -1,524350047 | 0 |
| ENSMUSG00000055013 | Agap1         | -1,524070024 | 0 |
| ENSMUSG00000031015 | Swap70        | -1,522009969 | 0 |
| ENSMUSG00000026872 | Zeb2          | -1,520910025 | 0 |
| ENSMUSG00000026836 | Acvr1         | -1,517470002 | 0 |
| ENSMUSG00000026037 | Orc2          | -1,515849948 | 0 |
| ENSMUSG00000020167 | Tcf3          | -1,514449954 | 0 |
| ENSMUSG00000029186 | Pi4k2b        | -1,513700008 | 0 |
| ENSMUSG00000029860 | Zyx           | -1,51225996  | 0 |
| ENSMUSG00000001376 | Vps50         | -1,511520028 | 0 |
| ENSMUSG00000022488 | Nckap1l       | -1,510519981 | 0 |
| ENSMUSG00000024937 | Ehbp1l1       | -1,500880003 | 0 |
| ENSMUSG00000031078 | Cttn          | -1,498669982 | 0 |
| ENSMUSG00000042506 | Usp22         | -1,495859981 | 0 |
| ENSMUSG00000022191 | Drosha        | -1,495049953 | 0 |
| ENSMUSG00000027130 | Slc12a6       | -1,495030046 | 0 |
| ENSMUSG00000033088 | Triobp        | -1,49356997  | 0 |
| ENSMUSG00000034349 | Smc4          | -1,493430018 | 0 |
| ENSMUSG00000031161 | Hdac6         | -1,490620017 | 0 |
| ENSMUSG00000027132 | Katnbl1       | -1,489199996 | 0 |
| ENSMUSG00000002107 | Celf2         | -1,487990022 | 0 |
| ENSMUSG00000051615 | Rap2a         | -1,48495996  | 0 |
| ENSMUSG00000047407 | Tgif1         | -1,475309968 | 0 |
| ENSMUSG00000061458 | Nol10         | -1,473389983 | 0 |
| ENSMUSG00000021948 | Prkcd         | -1,470829964 | 0 |
| ENSMUSG00000062070 | Pgk1          | -1,466650009 | 0 |
| ENSMUSG00000024614 | Tmx3          | -1,466140032 | 0 |
| ENSMUSG00000024833 | Pola2         | -1,466120005 | 0 |
| ENSMUSG00000041238 | Rbbp8         | -1,464759946 | 0 |
| ENSMUSG00000051413 | Plagl2        | -1,463770032 | 0 |
| ENSMUSG00000053477 | Tcf4          | -1,461680055 | 0 |
| ENSMUSG00000040435 | Ppp1r15a      | -1,458739996 | 0 |
| ENSMUSG00000025373 | Rnf41         | -1,456050038 | 0 |
| ENSMUSG00000032481 | Smarcc1       | -1,453019977 | 0 |
| ENSMUSG00000033454 | Zbtb1         | -1,446859956 | 0 |
| ENSMUSG00000034993 | Vat1          | -1,446269989 | 0 |
| ENSMUSG00000022052 | Ppp2r2a       | -1,445709944 | 0 |
| ENSMUSG00000020888 | Dvl2          | -1,441300035 | 0 |
| ENSMUSG00000024143 | Rhoq          | -1,438709974 | 0 |
| ENSMUSG00000021645 | Smn1          | -1,436910033 | 0 |
| ENSMUSG00000031983 | 2310022B05Rik | -1,435709953 | 0 |
| ENSMUSG00000020898 | Ctc1          | -1,434299946 | 0 |
| ENSMUSG00000006273 | Atp6v1b2      | -1,434010029 | 0 |
| ENSMUSG00000021692 | Dimt1         | -1,425490022 | 0 |
| ENSMUSG00000019777 | Hdac2         | -1,421090007 | 0 |
| ENSMUSG00000027351 | Spred1        | -1,419440031 | 0 |

|                    |          |              |   |
|--------------------|----------|--------------|---|
| ENSMUSG00000028656 | Cap1     | -1,416530013 | 0 |
| ENSMUSG00000027479 | Mapre1   | -1,408089995 | 0 |
| ENSMUSG00000047777 | Phf13    | -1,396039963 | 0 |
| ENSMUSG00000001036 | Epn2     | -1,395249963 | 0 |
| ENSMUSG00000040433 | Zbtb38   | -1,39151001  | 0 |
| ENSMUSG00000056917 | Sipa1    | -1,391420007 | 0 |
| ENSMUSG00000007850 | Hnrnp1   | -1,391379952 | 0 |
| ENSMUSG00000029730 | Mcm7     | -1,388990045 | 0 |
| ENSMUSG00000036002 | Fam214b  | -1,38646996  | 0 |
| ENSMUSG00000040945 | Rcc2     | -1,381739974 | 0 |
| ENSMUSG00000042901 | Aida     | -1,372849941 | 0 |
| ENSMUSG00000027247 | Arhgap1  | -1,366559982 | 0 |
| ENSMUSG00000026123 | Plekhb2  | -1,363440037 | 0 |
| ENSMUSG00000009207 | Lnpk     | -1,36145997  | 0 |
| ENSMUSG00000058388 | Phtf1    | -1,358899951 | 0 |
| ENSMUSG00000022329 | Stk3     | -1,354239941 | 0 |
| ENSMUSG00000028063 | Lmna     | -1,353899956 | 0 |
| ENSMUSG00000020326 | Ccng1    | -1,353160024 | 0 |
| ENSMUSG00000026737 | Pip4k2a  | -1,350460052 | 0 |
| ENSMUSG00000036940 | Kdm1a    | -1,348090053 | 0 |
| ENSMUSG00000017765 | Slc12a4  | -1,344779968 | 0 |
| ENSMUSG00000015749 | Anp32e   | -1,344490051 | 0 |
| ENSMUSG00000027200 | Sema6d   | -1,341050029 | 0 |
| ENSMUSG00000076432 | Ywhaq    | -1,328529954 | 0 |
| ENSMUSG00000026970 | Rbms1    | -1,324110031 | 0 |
| ENSMUSG00000026426 | Arl8a    | -1,321969986 | 0 |
| ENSMUSG00000074247 | Dda1     | -1,321370006 | 0 |
| ENSMUSG00000027534 | Snx16    | -1,320459962 | 0 |
| ENSMUSG00000042492 | Tbc1d10b | -1,317589998 | 0 |
| ENSMUSG00000020015 | Cdk17    | -1,316079974 | 0 |
| ENSMUSG00000029179 | Zcchc4   | -1,309739947 | 0 |
| ENSMUSG00000020290 | Xpo1     | -1,303560019 | 0 |
| ENSMUSG00000037253 | Mex3c    | -1,302659988 | 0 |
| ENSMUSG00000038545 | Cul7     | -1,297970057 | 0 |
| ENSMUSG00000031834 | Pik3r2   | -1,297170043 | 0 |
| ENSMUSG00000030748 | Il4ra    | -1,285740018 | 0 |
| ENSMUSG00000034168 | Irf2bpl  | -1,284950018 | 0 |
| ENSMUSG00000036270 | Edc4     | -1,279240012 | 0 |
| ENSMUSG00000001248 | Gramd1a  | -1,277169943 | 0 |
| ENSMUSG00000025366 | Esyt1    | -1,277150035 | 0 |
| ENSMUSG00000032253 | Phip     | -1,277089953 | 0 |
| ENSMUSG00000039483 | Asb6     | -1,27602005  | 0 |
| ENSMUSG00000020156 | Mum1     | -1,272699952 | 0 |
| ENSMUSG00000032035 | Ets1     | -1,26425004  | 0 |
| ENSMUSG00000016757 | Ttll12   | -1,254889965 | 0 |
| ENSMUSG00000004846 | Plod3    | -1,245329976 | 0 |
| ENSMUSG00000031065 | Cdk16    | -1,240620017 | 0 |

|                    |          |              |   |
|--------------------|----------|--------------|---|
| ENSMUSG00000075415 | Fnbp1    | -1,231850028 | 0 |
| ENSMUSG00000020393 | Kremen1  | -1,230110049 | 0 |
| ENSMUSG00000066892 | Fbxl12   | -1,221680045 | 0 |
| ENSMUSG00000020260 | Pofut2   | -1,220970035 | 0 |
| ENSMUSG00000041438 | Utp4     | -1,219040036 | 0 |
| ENSMUSG00000030978 | Rrm1     | -1,21104002  | 0 |
| ENSMUSG00000009535 | Rnmt     | -1,210289955 | 0 |
| ENSMUSG00000037062 | Sh3glb1  | -1,209419966 | 0 |
| ENSMUSG00000057789 | Bak1     | -1,205639958 | 0 |
| ENSMUSG00000043895 | S1pr2    | -1,192080021 | 0 |
| ENSMUSG00000029550 | Sspl3    | -1,180349946 | 0 |
| ENSMUSG00000047539 | Fbxo28   | -1,177010059 | 0 |
| ENSMUSG00000029064 | Gnb1     | -1,162240028 | 0 |
| ENSMUSG00000059288 | Cdyl     | -1,156069994 | 0 |
| ENSMUSG00000029767 | Calu     | -1,152660012 | 0 |
| ENSMUSG00000056153 | Socs6    | -1,150449991 | 0 |
| ENSMUSG00000025132 | Arhgdia  | -1,149379969 | 0 |
| ENSMUSG00000001052 | Sec24b   | -1,141939998 | 0 |
| ENSMUSG00000041354 | Rgl2     | -1,137639999 | 0 |
| ENSMUSG00000033272 | Slc35a4  | -1,134780049 | 0 |
| ENSMUSG00000079037 | Prnp     | -1,134299994 | 0 |
| ENSMUSG00000036678 | Aaas     | -1,131579995 | 0 |
| ENSMUSG00000041890 | Git2     | -1,115210056 | 0 |
| ENSMUSG00000026509 | Capn2    | -1,114380002 | 0 |
| ENSMUSG00000038517 | Tbkbp1   | -1,113950014 | 0 |
| ENSMUSG00000061028 | Clasrp   | -1,112949967 | 0 |
| ENSMUSG00000051391 | Ywhag    | -1,112450004 | 0 |
| ENSMUSG00000029234 | Tmem165  | -1,11145997  | 0 |
| ENSMUSG00000027940 | Tpm3     | -1,108909965 | 0 |
| ENSMUSG00000021115 | Vrk1     | -1,107969999 | 0 |
| ENSMUSG00000054766 | Set      | -1,100450039 | 0 |
| ENSMUSG00000023110 | Prmt5    | -1,09525001  | 0 |
| ENSMUSG00000033623 | Pcgf3    | -1,083600044 | 0 |
| ENSMUSG00000005103 | Wdr1     | -1,076380014 | 0 |
| ENSMUSG00000053158 | Fes      | -1,064339995 | 0 |
| ENSMUSG00000022283 | Pabpc1   | -1,062450051 | 0 |
| ENSMUSG00000040124 | Gorab    | -1,061079979 | 0 |
| ENSMUSG00000023883 | Phf10    | -1,043089986 | 0 |
| ENSMUSG00000025995 | Wdr75    | -1,041769981 | 0 |
| ENSMUSG00000050697 | Prkaa1   | -1,031460047 | 0 |
| ENSMUSG00000029703 | Lrwd1    | -1,031229973 | 0 |
| ENSMUSG00000018848 | Rars     | -1,027220011 | 0 |
| ENSMUSG00000028114 | Mettl14  | -1,009349942 | 0 |
| ENSMUSG00000038299 | Wdr36    | -1,002130032 | 0 |
| ENSMUSG00000003131 | Pafah1b2 | -1,001510024 | 0 |
| ENSMUSG00000028614 | Ndc1     | -1,00150001  | 0 |
| ENSMUSG00000039828 | Wdr70    | -1,00059998  | 0 |

|                    |         |              |   |
|--------------------|---------|--------------|---|
| ENSMUSG0000004451  | Ralb    | -0,983650029 | 0 |
| ENSMUSG00000031578 | Mak16   | -0,981469989 | 0 |
| ENSMUSG00000075376 | Rc3h2   | -0,979889989 | 0 |
| ENSMUSG00000022607 | Ptk2    | -0,979659975 | 0 |
| ENSMUSG00000027361 | Gabpb1  | -0,975849986 | 0 |
| ENSMUSG00000027067 | Ssrp1   | -0,96934998  | 0 |
| ENSMUSG00000001833 | Sept7   | -0,967109978 | 0 |
| ENSMUSG00000026977 | March7  | -0,965799987 | 0 |
| ENSMUSG00000022992 | Kansl2  | -0,957520008 | 0 |
| ENSMUSG00000032562 | Gnai2   | -0,948080003 | 0 |
| ENSMUSG00000026974 | Zmynd19 | -0,944589972 | 0 |
| ENSMUSG00000038416 | Cdc16   | -0,937810004 | 0 |
| ENSMUSG00000018040 | Rrp7a   | -0,932709992 | 0 |
| ENSMUSG00000027012 | Dync1i2 | -0,909919977 | 0 |
| ENSMUSG00000041815 | Poldip3 | -0,907329977 | 0 |
| ENSMUSG00000033392 | Clasp2  | -0,901090026 | 0 |
| ENSMUSG00000037935 | Smarce1 | -0,893060029 | 0 |
| ENSMUSG00000050229 | Pigm    | -0,891439974 | 0 |
| ENSMUSG00000027509 | Rae1    | -0,888429999 | 0 |
| ENSMUSG00000015961 | Adss    | -0,857320011 | 0 |
| ENSMUSG00000030662 | Ipo5    | -0,854510009 | 0 |
| ENSMUSG00000031575 | Ash2l   | -0,848850012 | 0 |
| ENSMUSG00000074886 | Grk6    | -0,844169974 | 0 |
| ENSMUSG00000015120 | Ube2i   | -0,839540005 | 0 |
| ENSMUSG00000041057 | Wdr43   | -0,838240027 | 0 |
| ENSMUSG00000026234 | Ncl     | -0,832939982 | 0 |
| ENSMUSG00000068882 | Ssb     | -0,828840017 | 0 |
| ENSMUSG00000011958 | Bnip2   | -0,828260005 | 0 |
| ENSMUSG00000026341 | Actr3   | -0,827109993 | 0 |
| ENSMUSG00000039509 | Nup133  | -0,817340016 | 0 |
| ENSMUSG00000040667 | Nup88   | -0,800639987 | 0 |
| ENSMUSG00000025228 | Actr1a  | -0,751860023 | 0 |
| ENSMUSG00000025162 | Csnk1d  | -0,71845001  | 0 |
| ENSMUSG00000026761 | Orc4    | -0,715990007 | 0 |
| ENSMUSG00000026277 | Stk25   | -0,712409973 | 0 |
| ENSMUSG00000038542 | Pcid2   | -0,710640013 | 0 |
| ENSMUSG00000020430 | Pes1    | -0,696309984 | 0 |
| ENSMUSG00000048039 | Isg20l2 | -0,6505      | 0 |
| ENSMUSG00000023932 | Cdc5l   | -0,616479993 | 0 |
| ENSMUSG00000062078 | Qk      | -0,616400003 | 0 |
| ENSMUSG00000031948 | Kars    | -0,614030004 | 0 |
| ENSMUSG00000002733 | Plekha3 | -0,60856998  | 0 |
| ENSMUSG00000062014 | Gmfb    | -0,60661     | 0 |
| ENSMUSG00000027519 | Rab22a  | -0,580669999 | 0 |
| ENSMUSG00000052337 | Immt    | 0,452170014  | 0 |
| ENSMUSG00000031357 | Syap1   | 0,500609994  | 0 |
| ENSMUSG00000030301 | Ccdc91  | 0,514310002  | 0 |

|                     |           |             |   |
|---------------------|-----------|-------------|---|
| ENSMUSG00000022841  | Ap2m1     | 0,615480006 | 0 |
| ENSMUSG00000039427  | Alg1      | 0,623440027 | 0 |
| ENSMUSG00000003308  | Keap1     | 0,627830029 | 0 |
| ENSMUSG000000031485 | Plpbp     | 0,633639991 | 0 |
| ENSMUSG000000024712 | Rfk       | 0,654839993 | 0 |
| ENSMUSG000000022536 | Glyr1     | 0,659510016 | 0 |
| ENSMUSG000000022404 | Slc25a17  | 0,69769001  | 0 |
| ENSMUSG000000004535 | Tax1bp1   | 0,70460999  | 0 |
| ENSMUSG000000031201 | Brcc3     | 0,707759976 | 0 |
| ENSMUSG000000022685 | Parn      | 0,720950007 | 0 |
| ENSMUSG00000018340  | Anxa6     | 0,729260027 | 0 |
| ENSMUSG000000003037 | Rab8a     | 0,753679991 | 0 |
| ENSMUSG000000031077 | Fadd      | 0,753970027 | 0 |
| ENSMUSG000000005299 | Letm1     | 0,791350007 | 0 |
| ENSMUSG000000031703 | Itfg1     | 0,793389976 | 0 |
| ENSMUSG000000029536 | Gatc      | 0,793500006 | 0 |
| ENSMUSG000000013878 | Rnf170    | 0,801020026 | 0 |
| ENSMUSG000000024780 | Cdc37l1   | 0,822170019 | 0 |
| ENSMUSG000000001100 | Poldip2   | 0,838540018 | 0 |
| ENSMUSG000000035517 | Tdrd7     | 0,848020017 | 0 |
| ENSMUSG000000056692 | D17Wsu92e | 0,852400005 | 0 |
| ENSMUSG000000072946 | Ptgr2     | 0,855570018 | 0 |
| ENSMUSG000000045302 | Preb      | 0,861060023 | 0 |
| ENSMUSG000000003234 | Abcf3     | 0,862590015 | 0 |
| ENSMUSG000000053768 | Chchd3    | 0,863279998 | 0 |
| ENSMUSG000000032309 | Fbxo22    | 0,864449978 | 0 |
| ENSMUSG000000020864 | Ankrd40   | 0,878620028 | 0 |
| ENSMUSG000000000441 | Raf1      | 0,910290003 | 0 |
| ENSMUSG000000020448 | Rnf185    | 0,910510004 | 0 |
| ENSMUSG000000024642 | Tle4      | 0,916830003 | 0 |
| ENSMUSG000000047731 | Wbp1l     | 0,921140015 | 0 |
| ENSMUSG000000090935 | Synj2bp   | 0,922020018 | 0 |
| ENSMUSG000000036257 | Pnpla8    | 0,930989981 | 0 |
| ENSMUSG000000021371 | Mcur1     | 0,933420002 | 0 |
| ENSMUSG000000042642 | Flad1     | 0,935109973 | 0 |
| ENSMUSG000000029722 | Agfg2     | 0,940699995 | 0 |
| ENSMUSG000000033096 | Apmap     | 0,946129978 | 0 |
| ENSMUSG000000001829 | Clpb      | 0,954680026 | 0 |
| ENSMUSG000000005225 | Plekha8   | 0,96085     | 0 |
| ENSMUSG000000021474 | Sfxn1     | 0,969649971 | 0 |
| ENSMUSG000000058446 | Znrf2     | 0,975950003 | 0 |
| ENSMUSG000000029221 | Slc30a9   | 0,976790011 | 0 |
| ENSMUSG000000066839 | Ecsit     | 0,982420027 | 0 |
| ENSMUSG000000022711 | Pmm2      | 0,986509979 | 0 |
| ENSMUSG000000019809 | Pex3      | 0,999329984 | 0 |
| ENSMUSG000000051412 | Vamp7     | 1,005249977 | 0 |
| ENSMUSG000000022664 | Slc35a5   | 1,00643003  | 0 |

|                    |               |             |   |
|--------------------|---------------|-------------|---|
| ENSMUSG00000031751 | Amfr          | 1,021540046 | 0 |
| ENSMUSG00000025239 | Limd1         | 1,021749973 | 0 |
| ENSMUSG00000024982 | Zdhhc6        | 1,02778995  | 0 |
| ENSMUSG00000030036 | Mogs          | 1,029649973 | 0 |
| ENSMUSG00000067369 | Trmt2b        | 1,049049973 | 0 |
| ENSMUSG00000040410 | Fbxl4         | 1,050189972 | 0 |
| ENSMUSG00000057497 | Fam136a       | 1,058650017 | 0 |
| ENSMUSG00000045414 | 1190002N15Rik | 1,08355999  | 0 |
| ENSMUSG00000044018 | Mrpl50        | 1,087610006 | 0 |
| ENSMUSG00000052751 | Repin1        | 1,100090027 | 0 |
| ENSMUSG00000020483 | Dynll2        | 1,100419998 | 0 |
| ENSMUSG00000074277 | Phldb3        | 1,105180025 | 0 |
| ENSMUSG00000028690 | Mmachc        | 1,106690049 | 0 |
| ENSMUSG00000039007 | Cpq           | 1,111750007 | 0 |
| ENSMUSG00000018042 | Cyb5r3        | 1,115300059 | 0 |
| ENSMUSG00000037260 | Hgsnat        | 1,117020011 | 0 |
| ENSMUSG00000030614 | Tmem126b      | 1,124590039 | 0 |
| ENSMUSG00000055850 | Rnf181        | 1,126559973 | 0 |
| ENSMUSG00000040462 | Os9           | 1,128819942 | 0 |
| ENSMUSG00000002781 | Tmem143       | 1,140409946 | 0 |
| ENSMUSG00000030884 | Uqcrc2        | 1,145619988 | 0 |
| ENSMUSG00000051238 | Swsap1        | 1,149909973 | 0 |
| ENSMUSG00000058706 | 0610030E20Rik | 1,151450038 | 0 |
| ENSMUSG00000040234 | Tm7sf3        | 1,160210013 | 0 |
| ENSMUSG00000009894 | Snap47        | 1,160290003 | 0 |
| ENSMUSG00000025403 | Shmt2         | 1,166280031 | 0 |
| ENSMUSG00000003546 | Klc4          | 1,174810052 | 0 |
| ENSMUSG00000027884 | Clcc1         | 1,189730048 | 0 |
| ENSMUSG00000022971 | Ifnar2        | 1,195359945 | 0 |
| ENSMUSG00000021577 | Sdha          | 1,208660007 | 0 |
| ENSMUSG00000004071 | Cdip1         | 1,209120035 | 0 |
| ENSMUSG00000025645 | Ccdc51        | 1,22784996  | 0 |
| ENSMUSG00000018995 | Nars2         | 1,234889984 | 0 |
| ENSMUSG00000040370 | Etfrf1        | 1,236039996 | 0 |
| ENSMUSG00000062762 | Ei24          | 1,237910032 | 0 |
| ENSMUSG00000031782 | Coq9          | 1,244539976 | 0 |
| ENSMUSG00000028710 | Atpaf1        | 1,247020006 | 0 |
| ENSMUSG00000042271 | Nxt2          | 1,261309981 | 0 |
| ENSMUSG00000065979 | Cpped1        | 1,265689969 | 0 |
| ENSMUSG00000036503 | Rnf13         | 1,281270027 | 0 |
| ENSMUSG00000044786 | Zfp36         | 1,287170053 | 0 |
| ENSMUSG00000089862 | Umad1         | 1,294819951 | 0 |
| ENSMUSG00000038206 | Fbxo8         | 1,304309964 | 0 |
| ENSMUSG00000043252 | Tmem64        | 1,305619955 | 0 |
| ENSMUSG00000030104 | Edem1         | 1,311650038 | 0 |
| ENSMUSG00000060733 | lpmk          | 1,318899989 | 0 |
| ENSMUSG00000036932 | Aifm1         | 1,321130037 | 0 |



|                    |               |             |   |
|--------------------|---------------|-------------|---|
| ENSMUSG00000039480 | Nt5dc1        | 1,32652998  | 0 |
| ENSMUSG00000049624 | Slc17a5       | 1,334890008 | 0 |
| ENSMUSG00000058979 | Hdhd5         | 1,337180018 | 0 |
| ENSMUSG00000078584 | AU022252      | 1,345999956 | 0 |
| ENSMUSG00000005981 | Trap1         | 1,350630045 | 0 |
| ENSMUSG00000069206 | Zfp874a       | 1,350950003 | 0 |
| ENSMUSG00000001211 | Agpat3        | 1,35292995  | 0 |
| ENSMUSG00000031672 | Got2          | 1,354200006 | 0 |
| ENSMUSG00000051346 | Spryd4        | 1,360100031 | 0 |
| ENSMUSG00000030979 | Uros          | 1,361889958 | 0 |
| ENSMUSG00000008305 | Tle1          | 1,36353004  | 0 |
| ENSMUSG00000027709 | Mccc1         | 1,364060044 | 0 |
| ENSMUSG00000001366 | Fbxo9         | 1,38143003  | 0 |
| ENSMUSG00000037971 | 1110032A03Rik | 1,389619946 | 0 |
| ENSMUSG00000005069 | Pex5          | 1,391829967 | 0 |
| ENSMUSG00000033216 | Eefsec        | 1,392490029 | 0 |
| ENSMUSG00000039682 | Lap3          | 1,39854002  | 0 |
| ENSMUSG00000046949 | Nqo2          | 1,401080012 | 0 |
| ENSMUSG00000028696 | Ipp           | 1,40813005  | 0 |
| ENSMUSG00000042505 | Sdhaf3        | 1,424790025 | 0 |
| ENSMUSG00000033985 | Tesk2         | 1,427160025 | 0 |
| ENSMUSG00000021900 | Btd           | 1,430080056 | 0 |
| ENSMUSG00000042647 | Acad12        | 1,431349993 | 0 |
| ENSMUSG00000068551 | Zfp467        | 1,441030025 | 0 |
| ENSMUSG00000021981 | Cab39l        | 1,460090041 | 0 |
| ENSMUSG00000013539 | Tango2        | 1,464079976 | 0 |
| ENSMUSG00000071253 | Slc25a16      | 1,464190006 | 0 |
| ENSMUSG00000029759 | Pon3          | 1,485209942 | 0 |
| ENSMUSG00000032485 | Scap          | 1,486220002 | 0 |
| ENSMUSG00000031969 | Acad8         | 1,494449973 | 0 |
| ENSMUSG00000006731 | B4galnt1      | 1,516289949 | 0 |
| ENSMUSG00000069520 | Tmem19        | 1,523779988 | 0 |
| ENSMUSG00000004462 | Tbccd1        | 1,534870028 | 0 |
| ENSMUSG00000030861 | Acadsb        | 1,54113996  | 0 |
| ENSMUSG00000038552 | Fndc4         | 1,543480039 | 0 |
| ENSMUSG00000029776 | Hibadh        | 1,547250032 | 0 |
| ENSMUSG00000061838 | Suclg2        | 1,547709942 | 0 |
| ENSMUSG00000024654 | Asrgl1        | 1,559759974 | 0 |
| ENSMUSG00000021048 | Mthfd1        | 1,564170003 | 0 |
| ENSMUSG00000026638 | Irf6          | 1,591480017 | 0 |
| ENSMUSG00000015112 | Slc25a13      | 1,593330026 | 0 |
| ENSMUSG00000022235 | Cmb1          | 1,594020009 | 0 |
| ENSMUSG00000000594 | Gm2a          | 1,60781002  | 0 |
| ENSMUSG00000028405 | Aco1          | 1,608860016 | 0 |
| ENSMUSG00000056938 | Acbd4         | 1,621829987 | 0 |
| ENSMUSG00000060376 | Bckdha        | 1,631629944 | 0 |
| ENSMUSG00000045867 | Cradd         | 1,641330004 | 0 |

|                    |          |             |   |
|--------------------|----------|-------------|---|
| ENSMUSG00000024782 | Ak3      | 1,642089963 | 0 |
| ENSMUSG00000021476 | Habp4    | 1,644209981 | 0 |
| ENSMUSG00000030788 | Rnf141   | 1,644279957 | 0 |
| ENSMUSG00000033416 | Gucd1    | 1,654760003 | 0 |
| ENSMUSG00000031090 | Nadsyn1  | 1,65989995  | 0 |
| ENSMUSG00000039428 | Tmem135  | 1,676489949 | 0 |
| ENSMUSG00000021136 | Smoc1    | 1,680320024 | 0 |
| ENSMUSG00000020335 | Zfp354b  | 1,680420041 | 0 |
| ENSMUSG00000035877 | Zhx3     | 1,682250023 | 0 |
| ENSMUSG00000028601 | Echdc2   | 1,684139967 | 0 |
| ENSMUSG00000020629 | Adi1     | 1,685590029 | 0 |
| ENSMUSG00000058806 | Col13a1  | 1,69667995  | 0 |
| ENSMUSG00000029456 | Acad10   | 1,705109954 | 0 |
| ENSMUSG00000037366 | Pafah2   | 1,711889982 | 0 |
| ENSMUSG00000037573 | Tob1     | 1,714580059 | 0 |
| ENSMUSG00000026730 | Pter     | 1,718850017 | 0 |
| ENSMUSG00000028967 | Errfi1   | 1,720370054 | 0 |
| ENSMUSG00000051359 | Ncald    | 1,722650051 | 0 |
| ENSMUSG00000035376 | Hacd2    | 1,732720017 | 0 |
| ENSMUSG00000021646 | Mccc2    | 1,745100021 | 0 |
| ENSMUSG00000020386 | Sar1b    | 1,759860039 | 0 |
| ENSMUSG00000024975 | Pdcd4    | 1,781000018 | 0 |
| ENSMUSG00000052738 | Suclg1   | 1,783110023 | 0 |
| ENSMUSG00000030498 | Gas2     | 1,788239956 | 0 |
| ENSMUSG00000066150 | Slc31a1  | 1,793799996 | 0 |
| ENSMUSG00000079834 | Tmlhe    | 1,796640038 | 0 |
| ENSMUSG00000028744 | Pqlc2    | 1,797150016 | 0 |
| ENSMUSG00000041939 | Mvk      | 1,811540008 | 0 |
| ENSMUSG00000028024 | Enpep    | 1,830199957 | 0 |
| ENSMUSG00000024588 | Fech     | 1,83999002  | 0 |
| ENSMUSG00000047230 | Cldn2    | 1,848080039 | 0 |
| ENSMUSG00000020309 | Chac2    | 1,849920034 | 0 |
| ENSMUSG00000038167 | Plekhg6  | 1,85213995  | 0 |
| ENSMUSG00000005320 | Fgfr4    | 1,852429986 | 0 |
| ENSMUSG00000054226 | Tprkb    | 1,854529977 | 0 |
| ENSMUSG00000029167 | Ppargc1a | 1,854869962 | 0 |
| ENSMUSG00000027533 | Fabp5    | 1,874519944 | 0 |
| ENSMUSG00000046314 | Stxbp6   | 1,875810027 | 0 |
| ENSMUSG00000039197 | Adk      | 1,885489941 | 0 |
| ENSMUSG00000051098 | Mblac2   | 1,886919975 | 0 |
| ENSMUSG00000020003 | Pex7     | 1,897289991 | 0 |
| ENSMUSG00000053644 | Aldh7a1  | 1,903519988 | 0 |
| ENSMUSG00000032652 | Crebl2   | 1,905689955 | 0 |
| ENSMUSG00000028860 | Sytl1    | 1,92106998  | 0 |
| ENSMUSG00000021420 | Fars2    | 1,927889943 | 0 |
| ENSMUSG00000045975 | C2cd2    | 1,928879976 | 0 |
| ENSMUSG00000056666 | Retsat   | 1,93651998  | 0 |

|                    |          |             |   |
|--------------------|----------|-------------|---|
| ENSMUSG00000048087 | Gm4737   | 1,944499969 | 0 |
| ENSMUSG00000027597 | Ahcy     | 1,947029948 | 0 |
| ENSMUSG00000033594 | Spata2l  | 1,94825995  | 0 |
| ENSMUSG00000028229 | Rmdn1    | 1,952149987 | 0 |
| ENSMUSG00000055137 | Sugct    | 1,953009963 | 0 |
| ENSMUSG00000032540 | Abhd5    | 1,95449996  | 0 |
| ENSMUSG00000041762 | Gpr155   | 1,955119967 | 0 |
| ENSMUSG00000025036 | Sfxn2    | 1,965049982 | 0 |
| ENSMUSG00000000303 | Cdh1     | 1,971869946 | 0 |
| ENSMUSG00000000340 | Dbt      | 1,972919941 | 0 |
| ENSMUSG00000029735 | Tpk1     | 1,976629972 | 0 |
| ENSMUSG00000045284 | Dcaf12l1 | 1,985669971 | 0 |
| ENSMUSG00000019838 | Slc16a10 | 1,996680021 | 0 |
| ENSMUSG00000033781 | Asb13    | 2,009030104 | 0 |
| ENSMUSG00000003526 | Prodh    | 2,012510061 | 0 |
| ENSMUSG00000041625 | Ggact    | 2,015130043 | 0 |
| ENSMUSG00000028573 | Fggy     | 2,02899003  | 0 |
| ENSMUSG00000031790 | Mmp15    | 2,02918005  | 0 |
| ENSMUSG00000029669 | Tspan12  | 2,064830065 | 0 |
| ENSMUSG00000073910 | Mob3b    | 2,065680027 | 0 |
| ENSMUSG00000003559 | As3mt    | 2,076989889 | 0 |
| ENSMUSG00000041471 | Shld2    | 2,087379932 | 0 |
| ENSMUSG00000038286 | Bphl     | 2,097759962 | 0 |
| ENSMUSG00000001891 | Ugp2     | 2,101469994 | 0 |
| ENSMUSG00000025486 | Sirt3    | 2,110019922 | 0 |
| ENSMUSG00000030088 | Aldh1l1  | 2,11548996  | 0 |
| ENSMUSG00000017978 | Cadps2   | 2,124840021 | 0 |
| ENSMUSG00000044468 | Tent5c   | 2,133100033 | 0 |
| ENSMUSG00000032527 | Pccb     | 2,135329962 | 0 |
| ENSMUSG00000035944 | Ttc38    | 2,144309998 | 0 |
| ENSMUSG00000021069 | Pygl     | 2,150170088 | 0 |
| ENSMUSG00000040471 | Ggt6     | 2,165489912 | 0 |
| ENSMUSG00000032066 | Bco2     | 2,174920082 | 0 |
| ENSMUSG00000021340 | Gpld1    | 2,178910017 | 0 |
| ENSMUSG00000000753 | Serpinf1 | 2,18046999  | 0 |
| ENSMUSG00000054477 | Kcnn2    | 2,202909946 | 0 |
| ENSMUSG00000022244 | Amacr    | 2,220200062 | 0 |
| ENSMUSG00000055733 | Nap1l3   | 2,22059989  | 0 |
| ENSMUSG00000017309 | Cd300lg  | 2,228990078 | 0 |
| ENSMUSG00000055912 | Tmem150a | 2,236279964 | 0 |
| ENSMUSG00000039114 | Nrn1     | 2,237509966 | 0 |
| ENSMUSG00000061740 | Cyp2d22  | 2,237730026 | 0 |
| ENSMUSG00000034308 | Sdr42e1  | 2,242789984 | 0 |
| ENSMUSG00000039899 | Fgl2     | 2,243089914 | 0 |
| ENSMUSG00000030731 | Syt3     | 2,244529963 | 0 |
| ENSMUSG00000021376 | Tpmt     | 2,252720118 | 0 |
| ENSMUSG00000003809 | Gcdh     | 2,255929947 | 0 |

|                    |               |             |   |
|--------------------|---------------|-------------|---|
| ENSMUSG00000020053 | Igf1          | 2,257730007 | 0 |
| ENSMUSG00000034435 | Tmem30b       | 2,275680065 | 0 |
| ENSMUSG00000022751 | Nit2          | 2,294990063 | 0 |
| ENSMUSG00000039063 | Echdc3        | 2,301160097 | 0 |
| ENSMUSG00000021638 | Ocln          | 2,305579901 | 0 |
| ENSMUSG00000019768 | Esr1          | 2,316410065 | 0 |
| ENSMUSG00000030946 | Lhpp          | 2,32171011  | 0 |
| ENSMUSG00000021238 | Aldh6a1       | 2,331830025 | 0 |
| ENSMUSG00000021033 | Gstz1         | 2,332350016 | 0 |
| ENSMUSG00000035237 | Lcat          | 2,345999956 | 0 |
| ENSMUSG00000019987 | Arg1          | 2,355619907 | 0 |
| ENSMUSG00000052392 | Acot4         | 2,35649991  | 0 |
| ENSMUSG00000054263 | Lifr          | 2,359889984 | 0 |
| ENSMUSG00000028885 | Smpdl3b       | 2,367599964 | 0 |
| ENSMUSG00000027016 | Zfp385b       | 2,372950077 | 0 |
| ENSMUSG00000034687 | Fras1         | 2,390549898 | 0 |
| ENSMUSG00000024354 | Slc23a1       | 2,397469997 | 0 |
| ENSMUSG00000030737 | Slco2b1       | 2,410079956 | 0 |
| ENSMUSG00000037977 | 6430571L13Rik | 2,425800085 | 0 |
| ENSMUSG00000021509 | Slc25a48      | 2,432980061 | 0 |
| ENSMUSG00000025075 | Habp2         | 2,439640045 | 0 |
| ENSMUSG00000022304 | Dpys          | 2,442320108 | 0 |
| ENSMUSG00000036151 | Tm6sf2        | 2,458630085 | 0 |
| ENSMUSG00000049091 | Sephs2        | 2,465749979 | 0 |
| ENSMUSG00000025533 | Asl           | 2,474750042 | 0 |
| ENSMUSG00000021335 | Slc17a1       | 2,47871995  | 0 |
| ENSMUSG00000047394 | Odf3b         | 2,499880075 | 0 |
| ENSMUSG00000073424 | Cyp4f15       | 2,507149935 | 0 |
| ENSMUSG00000028179 | Cth           | 2,515130043 | 0 |
| ENSMUSG00000091721 | Gimd1         | 2,52782011  | 0 |
| ENSMUSG00000028536 | 2610528J11Rik | 2,530509949 | 0 |
| ENSMUSG00000071335 | Mfsd4b3       | 2,533119917 | 0 |
| ENSMUSG00000022464 | Slc38a4       | 2,538899899 | 0 |
| ENSMUSG00000029499 | Pxmp2         | 2,566570044 | 0 |
| ENSMUSG00000056966 | Gjc3          | 2,570319891 | 0 |
| ENSMUSG00000025813 | Homer2        | 2,572870016 | 0 |
| ENSMUSG00000010601 | Apol7a        | 2,593169928 | 0 |
| ENSMUSG00000025815 | Dhtkd1        | 2,608089924 | 0 |
| ENSMUSG00000036585 | Fgf1          | 2,616679907 | 0 |
| ENSMUSG00000054619 | Mettl7a1      | 2,618590117 | 0 |
| ENSMUSG00000021336 | Slc17a4       | 2,634269953 | 0 |
| ENSMUSG00000064215 | Ifi27         | 2,657010078 | 0 |
| ENSMUSG00000001763 | Tspan33       | 2,661170006 | 0 |
| ENSMUSG00000030087 | Klf15         | 2,686239958 | 0 |
| ENSMUSG00000030934 | Oat           | 2,688319921 | 0 |
| ENSMUSG00000010122 | Slc47a1       | 2,734930038 | 0 |
| ENSMUSG00000046070 | Igfals        | 2,739789963 | 0 |

|                    |           |             |   |
|--------------------|-----------|-------------|---|
| ENSMUSG00000024990 | Rbp4      | 2,772059917 | 0 |
| ENSMUSG00000029695 | Aass      | 2,80050993  | 0 |
| ENSMUSG00000026986 | Hnmt      | 2,801379919 | 0 |
| ENSMUSG00000045282 | Tmem86b   | 2,816030025 | 0 |
| ENSMUSG00000040147 | Maob      | 2,828919888 | 0 |
| ENSMUSG00000029102 | Hgfac     | 2,841039896 | 0 |
| ENSMUSG00000015890 | Amdhd1    | 2,859129906 | 0 |
| ENSMUSG00000066366 | Serpina1a | 2,866230011 | 0 |
| ENSMUSG00000058207 | Serpina3k | 2,868370056 | 0 |
| ENSMUSG00000026348 | Acmsd     | 2,88470006  | 0 |
| ENSMUSG00000038641 | Akr1d1    | 2,892050028 | 0 |
| ENSMUSG00000031147 | Magix     | 2,903069973 | 0 |
| ENSMUSG00000078817 | Nlrp12    | 2,912849903 | 0 |
| ENSMUSG00000027761 | Aadac     | 2,915899992 | 0 |
| ENSMUSG00000022762 | Ncam2     | 2,937249899 | 0 |
| ENSMUSG00000041261 | Car8      | 2,945849895 | 0 |
| ENSMUSG00000071178 | Serpina1b | 2,95333004  | 0 |
| ENSMUSG00000027296 | Itpka     | 2,966700077 | 0 |
| ENSMUSG00000030382 | Slc27a5   | 2,994590044 | 0 |
| ENSMUSG00000029269 | Sult1b1   | 3,017240047 | 0 |
| ENSMUSG00000044005 | Gls2      | 3,047209978 | 0 |
| ENSMUSG00000044378 | Slc15a5   | 3,052380085 | 0 |
| ENSMUSG00000038704 | Aspdh     | 3,061480045 | 0 |
| ENSMUSG00000076441 | Ass1      | 3,072370052 | 0 |
| ENSMUSG00000028008 | Asic5     | 3,081700087 | 0 |
| ENSMUSG00000060407 | Cyp2a12   | 3,088579893 | 0 |
| ENSMUSG00000020051 | Pah       | 3,093470097 | 0 |
| ENSMUSG00000025991 | Cps1      | 3,098599911 | 0 |
| ENSMUSG00000074768 | Bhmt      | 3,124900103 | 0 |
| ENSMUSG00000073102 | Drc1      | 3,13090992  | 0 |
| ENSMUSG00000027965 | Olfm3     | 3,138010025 | 0 |
| ENSMUSG00000045087 | S1pr5     | 3,156260014 | 0 |
| ENSMUSG00000016194 | Hsd11b1   | 3,16008997  | 0 |
| ENSMUSG00000068085 | Cyp2d11   | 3,172749996 | 0 |
| ENSMUSG00000035780 | Ugt2a3    | 3,175630093 | 0 |
| ENSMUSG00000038522 | Mfsd4b1   | 3,178080082 | 0 |
| ENSMUSG00000025317 | Car5a     | 3,199480057 | 0 |
| ENSMUSG00000024292 | Cyp4f14   | 3,202090025 | 0 |
| ENSMUSG00000068083 | Cyp2d40   | 3,213510036 | 0 |
| ENSMUSG00000063730 | Hsd3b2    | 3,250159979 | 0 |
| ENSMUSG00000069324 | Gm5096    | 3,266259909 | 0 |
| ENSMUSG00000029369 | Afm       | 3,272569895 | 0 |
| ENSMUSG00000005089 | Slc1a2    | 3,276449919 | 0 |
| ENSMUSG00000028354 | Fmn2      | 3,281970024 | 0 |
| ENSMUSG00000069733 | Ube2u     | 3,283479929 | 0 |
| ENSMUSG00000028011 | Tdo2      | 3,293639898 | 0 |
| ENSMUSG00000029445 | Hpd       | 3,384130001 | 0 |

|                    |               |              |   |
|--------------------|---------------|--------------|---|
| ENSMUSG00000025588 | Nat1          | 3,402630091  | 0 |
| ENSMUSG00000021135 | Slc10a1       | 3,409569979  | 0 |
| ENSMUSG00000071177 | Serpina1d     | 3,417030096  | 0 |
| ENSMUSG00000078650 | G6pc          | 3,475349903  | 0 |
| ENSMUSG00000001670 | Tat           | 3,481029987  | 0 |
| ENSMUSG00000089669 | Tnfsf13       | 3,500880003  | 0 |
| ENSMUSG00000026109 | Tmeff2        | 3,527829885  | 0 |
| ENSMUSG00000027762 | Sucnr1        | 3,602790117  | 0 |
| ENSMUSG00000052974 | Cyp2f2        | 3,60439992   | 0 |
| ENSMUSG00000023122 | Sult1c2       | 3,653110027  | 0 |
| ENSMUSG00000064202 | 4430402118Rik | 3,660470009  | 0 |
| ENSMUSG00000062181 | Ces3b         | 3,68046999   | 0 |
| ENSMUSG00000019232 | Etnppl        | 3,689320087  | 0 |
| ENSMUSG00000031173 | Otc           | 3,690829992  | 0 |
| ENSMUSG00000024992 | Pde6c         | 3,69562006   | 0 |
| ENSMUSG00000045776 | Lrtm1         | 3,715300083  | 0 |
| ENSMUSG00000029597 | Sds           | 3,720969915  | 0 |
| ENSMUSG00000025014 | Dntt          | 3,723659992  | 0 |
| ENSMUSG00000003477 | Inmt          | 3,773550034  | 0 |
| ENSMUSG00000032080 | Apoa4         | 3,850179911  | 0 |
| ENSMUSG00000051452 | Gm11437       | 3,947849989  | 0 |
| ENSMUSG00000066513 | Klk1b4        | 3,95746994   | 0 |
| ENSMUSG00000022129 | Dct           | 4,096419811  | 0 |
| ENSMUSG00000020017 | Hal           | 4,130700111  | 0 |
| ENSMUSG00000048498 | Cd300e        | 4,316860199  | 0 |
| ENSMUSG00000050071 | Bex1          | 4,402709961  | 0 |
| ENSMUSG00000029055 | Plch2         | 5,675749779  | 0 |
| ENSMUSG00000056162 | Cndp1         | 5,802740097  | 0 |
| ENSMUSG00000024029 | Tff3          | 6,263440132  | 0 |
| ENSMUSG00000056457 | Pr12c3        | -11,74518967 | 0 |
| ENSMUSG00000074934 | Grem1         | -11,05405998 | 0 |
| ENSMUSG00000020950 | Foxg1         | -10,95203018 | 0 |
| ENSMUSG00000034324 | Tmem132c      | -10,14021969 | 0 |
| ENSMUSG00000022367 | Has2          | -10,10544968 | 0 |
| ENSMUSG00000031737 | Irx5          | -9,890089989 | 0 |
| ENSMUSG00000068154 | Insm1         | -9,009110451 | 0 |
| ENSMUSG00000022144 | Gdnf          | -8,494720459 | 0 |
| ENSMUSG00000029819 | Npy           | -8,242360115 | 0 |
| ENSMUSG00000026443 | Lrrn2         | -7,542840004 | 0 |
| ENSMUSG00000024593 | Megf10        | -7,45980978  | 0 |
| ENSMUSG00000042357 | Gjb5          | -7,43888998  | 0 |
| ENSMUSG00000032532 | Cck           | -7,322730064 | 0 |
| ENSMUSG00000044499 | Hs3st5        | -7,179959774 | 0 |
| ENSMUSG00000032495 | Lrrc2         | -7,156990051 | 0 |
| ENSMUSG00000044165 | Bcl2l15       | -7,034049988 | 0 |
| ENSMUSG00000048988 | Elfn1         | -7,024730206 | 0 |
| ENSMUSG00000073433 | Arhgdig       | -6,723380089 | 0 |

|                    |               |              |   |
|--------------------|---------------|--------------|---|
| ENSMUSG0000004371  | Il11          | -6,526259899 | 0 |
| ENSMUSG00000051048 | P4ha3         | -6,365560055 | 0 |
| ENSMUSG00000049036 | Tmem121       | -6,351779938 | 0 |
| ENSMUSG00000031098 | Syt8          | -6,226520061 | 0 |
| ENSMUSG00000075302 | Erich2        | -6,13117981  | 0 |
| ENSMUSG00000053552 | Ebf4          | -6,036880016 | 0 |
| ENSMUSG00000042306 | S100a14       | -5,951509953 | 0 |
| ENSMUSG00000018924 | Alox15        | -5,912109852 | 0 |
| ENSMUSG00000020434 | 4921536K21Rik | -5,749330044 | 0 |
| ENSMUSG00000025938 | Slco5a1       | -5,736100197 | 0 |
| ENSMUSG00000027220 | Syt13         | -5,430160046 | 0 |
| ENSMUSG00000071984 | Fndc1         | -5,351299763 | 0 |
| ENSMUSG00000037855 | Zfp365        | -5,258250237 | 0 |
| ENSMUSG00000015627 | Gata5         | -5,065050125 | 0 |
| ENSMUSG00000030162 | Olr1          | -4,848370075 | 0 |
| ENSMUSG00000025665 | Rps6ka6       | -4,653659821 | 0 |
| ENSMUSG00000018500 | Adora2b       | -4,626930237 | 0 |
| ENSMUSG00000004267 | Eno2          | -4,456190109 | 0 |
| ENSMUSG00000020303 | Stc2          | -4,368330002 | 0 |
| ENSMUSG00000025069 | Gsto2         | -4,339290142 | 0 |
| ENSMUSG00000027656 | Wisp2         | -4,28426981  | 0 |
| ENSMUSG00000076431 | Sox4          | -4,213719845 | 0 |
| ENSMUSG00000024548 | Setbp1        | -4,206369877 | 0 |
| ENSMUSG00000005533 | Igf1r         | -4,163090229 | 0 |
| ENSMUSG00000050359 | Sprr1a        | -4,079410076 | 0 |
| ENSMUSG00000029913 | Prdm5         | -4,032929897 | 0 |
| ENSMUSG00000038879 | Nipal2        | -3,983920097 | 0 |
| ENSMUSG00000043635 | Adamts3       | -3,946810007 | 0 |
| ENSMUSG00000020808 | Pimreg        | -3,89715004  | 0 |
| ENSMUSG00000006403 | Adamts4       | -3,859019995 | 0 |
| ENSMUSG00000017817 | Jph2          | -3,817179918 | 0 |
| ENSMUSG00000021536 | Adcy2         | -3,669519901 | 0 |
| ENSMUSG00000034731 | Dgkh          | -3,623300076 | 0 |
| ENSMUSG00000025738 | Fbxl16        | -3,559449911 | 0 |
| ENSMUSG00000032258 | Lca5          | -3,540199995 | 0 |
| ENSMUSG00000042254 | Cilp          | -3,535059929 | 0 |
| ENSMUSG00000054150 | Syne3         | -3,394929886 | 0 |
| ENSMUSG00000040189 | Ccdc114       | -3,349030018 | 0 |
| ENSMUSG00000061577 | Adgrg5        | -3,31904006  | 0 |
| ENSMUSG00000050914 | Ankrd37       | -3,301529884 | 0 |
| ENSMUSG00000045725 | Prr15         | -3,287689924 | 0 |
| ENSMUSG00000042826 | Fgf11         | -3,276520014 | 0 |
| ENSMUSG00000027254 | Map1a         | -3,209439993 | 0 |
| ENSMUSG00000029769 | Ccdc136       | -3,157799959 | 0 |
| ENSMUSG00000046056 | Sbsn          | -3,153249979 | 0 |
| ENSMUSG00000029673 | Auts2         | -3,110800028 | 0 |
| ENSMUSG00000035783 | Acta2         | -3,055370092 | 0 |



|                    |          |              |   |
|--------------------|----------|--------------|---|
| ENSMUSG00000021678 | F2r1     | -3,052670002 | 0 |
| ENSMUSG00000042834 | Nrep     | -3,034919977 | 0 |
| ENSMUSG00000041731 | Pgm5     | -2,949749947 | 0 |
| ENSMUSG00000037447 | Arid5a   | -2,94246006  | 0 |
| ENSMUSG00000024989 | Cep55    | -2,909729958 | 0 |
| ENSMUSG00000029516 | Cit      | -2,909029961 | 0 |
| ENSMUSG00000070691 | Runx3    | -2,907000065 | 0 |
| ENSMUSG00000071604 | Fam189a2 | -2,868520021 | 0 |
| ENSMUSG00000063652 | Slc22a21 | -2,856090069 | 0 |
| ENSMUSG00000026604 | Ptpn14   | -2,833300114 | 0 |
| ENSMUSG00000030789 | Itgax    | -2,816260099 | 0 |
| ENSMUSG00000007379 | Dennd2c  | -2,798899889 | 0 |
| ENSMUSG00000032332 | Col12a1  | -2,781820059 | 0 |
| ENSMUSG00000055976 | Cldn23   | -2,780410051 | 0 |
| ENSMUSG00000054967 | Zfp647   | -2,759350061 | 0 |
| ENSMUSG00000050335 | Lgals3   | -2,706190109 | 0 |
| ENSMUSG00000021782 | Dlg5     | -2,629009962 | 0 |
| ENSMUSG00000048388 | Fam171b  | -2,587820053 | 0 |
| ENSMUSG00000027499 | Pkia     | -2,572520018 | 0 |
| ENSMUSG00000013155 | Enkd1    | -2,541019917 | 0 |
| ENSMUSG00000038987 | Cfap157  | -2,528350115 | 0 |
| ENSMUSG00000026103 | Gls      | -2,525779963 | 0 |
| ENSMUSG00000032363 | Adamts7  | -2,462249994 | 0 |
| ENSMUSG00000024944 | Arl2     | -2,442980051 | 0 |
| ENSMUSG00000042686 | Jph1     | -2,376280069 | 0 |
| ENSMUSG00000030583 | Sipa1l3  | -2,351330042 | 0 |
| ENSMUSG00000039232 | Stx11    | -2,344929934 | 0 |
| ENSMUSG00000004709 | Cd244a   | -2,338809967 | 0 |
| ENSMUSG00000022114 | Spry2    | -2,303159952 | 0 |
| ENSMUSG00000020212 | Mdm1     | -2,242660046 | 0 |
| ENSMUSG00000030695 | Aldoa    | -2,228159904 | 0 |
| ENSMUSG00000040584 | Abcb1a   | -2,226730108 | 0 |
| ENSMUSG00000032997 | Chpf     | -2,211889982 | 0 |
| ENSMUSG00000028128 | F3       | -2,199409962 | 0 |
| ENSMUSG00000000567 | Sox9     | -2,166769981 | 0 |
| ENSMUSG00000003534 | Ddr1     | -2,162780046 | 0 |
| ENSMUSG00000019773 | Fbxo5    | -2,162729979 | 0 |
| ENSMUSG00000001281 | Itgb7    | -2,144710064 | 0 |
| ENSMUSG00000029463 | Fam216a  | -2,10619998  | 0 |
| ENSMUSG00000020032 | Nuak1    | -2,029619932 | 0 |
| ENSMUSG00000017670 | Elmo2    | -2,015249968 | 0 |
| ENSMUSG00000031169 | Porcn    | -2,011059999 | 0 |
| ENSMUSG00000019558 | Slc6a8   | -1,971850038 | 0 |
| ENSMUSG00000022385 | Gtse1    | -1,97123003  | 0 |
| ENSMUSG00000028937 | Acot7    | -1,961359978 | 0 |
| ENSMUSG00000019846 | Lama4    | -1,933349967 | 0 |
| ENSMUSG00000020776 | Fbf1     | -1,927389979 | 0 |

|                    |         |              |   |
|--------------------|---------|--------------|---|
| ENSMUSG0000002059  | Rab34   | -1,922019958 | 0 |
| ENSMUSG00000037313 | Tacc3   | -1,916560054 | 0 |
| ENSMUSG00000020473 | Aebp1   | -1,909749985 | 0 |
| ENSMUSG00000038740 | Mvb12b  | -1,906800032 | 0 |
| ENSMUSG00000020810 | Cygb    | -1,89270997  | 0 |
| ENSMUSG00000027799 | Nbea    | -1,890879989 | 0 |
| ENSMUSG00000031373 | Car5b   | -1,863489985 | 0 |
| ENSMUSG00000027314 | Dll4    | -1,782109976 | 0 |
| ENSMUSG00000038893 | Fam117a | -1,77026999  | 0 |
| ENSMUSG00000053716 | Dusp7   | -1,769510031 | 0 |
| ENSMUSG00000003549 | Ercc1   | -1,748170018 | 0 |
| ENSMUSG00000036817 | Sun1    | -1,725119948 | 0 |
| ENSMUSG00000028995 | Fam126a | -1,714349985 | 0 |
| ENSMUSG00000026520 | Pycr2   | -1,703989983 | 0 |
| ENSMUSG00000022621 | Rab12   | -1,671370029 | 0 |
| ENSMUSG00000031709 | Tbc1d9  | -1,664100051 | 0 |
| ENSMUSG00000048779 | P2ry6   | -1,639510036 | 0 |
| ENSMUSG00000021262 | Evl     | -1,635769963 | 0 |
| ENSMUSG00000022272 | Myo10   | -1,618209958 | 0 |
| ENSMUSG00000021589 | Rhobtb3 | -1,591689944 | 0 |
| ENSMUSG00000030605 | Mfge8   | -1,585829973 | 0 |
| ENSMUSG00000042292 | Mkl1    | -1,571400046 | 0 |
| ENSMUSG00000020828 | Pld2    | -1,544389963 | 0 |
| ENSMUSG00000038187 | Btbd10  | -1,54321003  | 0 |
| ENSMUSG00000028776 | Tinagl1 | -1,53057003  | 0 |
| ENSMUSG00000031987 | Egln1   | -1,508329988 | 0 |
| ENSMUSG00000020580 | Rock2   | -1,467339993 | 0 |
| ENSMUSG00000022673 | Mcm4    | -1,426970005 | 0 |
| ENSMUSG00000022414 | Tab1    | -1,423650026 | 0 |
| ENSMUSG00000028134 | Ptbp2   | -1,401690006 | 0 |
| ENSMUSG00000018405 | Mrm1    | -1,357040048 | 0 |
| ENSMUSG00000033323 | Ctdp1   | -1,315500021 | 0 |
| ENSMUSG00000029156 | Sgcb    | -1,30666995  | 0 |
| ENSMUSG00000023026 | Dip2b   | -1,295459986 | 0 |
| ENSMUSG00000029253 | Cenpc1  | -1,251060009 | 0 |
| ENSMUSG00000040151 | Hs2st1  | -1,23258996  | 0 |
| ENSMUSG00000028901 | Gmeb1   | -1,226670027 | 0 |
| ENSMUSG00000026718 | Stam    | -1,21002996  | 0 |
| ENSMUSG00000025316 | Banp    | -1,194219947 | 0 |
| ENSMUSG00000021504 | B4galt7 | -1,153220057 | 0 |
| ENSMUSG00000003868 | Ruvbl2  | -1,126809955 | 0 |
| ENSMUSG00000030051 | Aplf    | -1,109480023 | 0 |
| ENSMUSG00000055491 | Pprc1   | -1,10086     | 0 |
| ENSMUSG00000027829 | Ccnl1   | -1,090199947 | 0 |
| ENSMUSG00000013698 | Pea15a  | -1,06972003  | 0 |
| ENSMUSG00000027854 | Sike1   | -1,044960022 | 0 |
| ENSMUSG00000033732 | Sf3b3   | -1,011590004 | 0 |

|                    |          |              |   |
|--------------------|----------|--------------|---|
| ENSMUSG00000015748 | Prpf3    | -1,005789995 | 0 |
| ENSMUSG00000035697 | Arhgap45 | -1,005220056 | 0 |
| ENSMUSG00000020929 | Eftud2   | -0,97645998  | 0 |
| ENSMUSG00000041747 | Utp15    | -0,970080018 | 0 |
| ENSMUSG00000040451 | Sgms1    | -0,946759999 | 0 |
| ENSMUSG00000004085 | Map3k20  | -0,922730029 | 0 |
| ENSMUSG00000015087 | Rabl6    | -0,914650023 | 0 |
| ENSMUSG00000034663 | Bmp2k    | -0,889150023 | 0 |
| ENSMUSG00000045039 | Megf8    | -0,883480012 | 0 |
| ENSMUSG00000018765 | Fxr2     | -0,870779991 | 0 |
| ENSMUSG00000006301 | Tmbim1   | -0,86609     | 0 |
| ENSMUSG00000025024 | Smndc1   | -0,862709999 | 0 |
| ENSMUSG00000041781 | Cpsf2    | -0,841920018 | 0 |
| ENSMUSG00000003161 | Sri      | -0,838039994 | 0 |
| ENSMUSG00000032435 | Dync1li1 | -0,807299972 | 0 |
| ENSMUSG00000000194 | Gpr107   | -0,747829974 | 0 |
| ENSMUSG00000007564 | Ppp2r1a  | -0,731859982 | 0 |
| ENSMUSG00000071646 | Mta2     | -0,731639981 | 0 |
| ENSMUSG00000042364 | Snx18    | -0,693340003 | 0 |
| ENSMUSG00000026174 | Cnot9    | -0,637220025 | 0 |
| ENSMUSG00000020745 | Pafah1b1 | -0,587679982 | 0 |
| ENSMUSG00000063801 | Ap3s2    | 0,523010015  | 0 |
| ENSMUSG00000040550 | Otud6b   | 0,557129979  | 0 |
| ENSMUSG00000028973 | Abcb8    | 0,567659974  | 0 |
| ENSMUSG00000037075 | Rnf139   | 0,582920015  | 0 |
| ENSMUSG00000001424 | Snd1     | 0,647790015  | 0 |
| ENSMUSG00000052214 | Opa3     | 0,660160005  | 0 |
| ENSMUSG00000042726 | Trafd1   | 0,666469991  | 0 |
| ENSMUSG00000056228 | Cars2    | 0,669459999  | 0 |
| ENSMUSG00000029598 | Plbd2    | 0,684570014  | 0 |
| ENSMUSG00000028559 | Osbpl9   | 0,741419971  | 0 |
| ENSMUSG00000045576 | St7l     | 0,751670003  | 0 |
| ENSMUSG00000034951 | Cog7     | 0,763520002  | 0 |
| ENSMUSG00000028252 | Ccnc     | 0,780340016  | 0 |
| ENSMUSG00000022706 | Mrpl40   | 0,805490017  | 0 |
| ENSMUSG00000079418 | Atg4a    | 0,832989991  | 0 |
| ENSMUSG00000011658 | Fuz      | 0,846920013  | 0 |
| ENSMUSG00000041241 | Mul1     | 0,875530005  | 0 |
| ENSMUSG00000028096 | Gpr89    | 0,900539994  | 0 |
| ENSMUSG00000025142 | Aspscr1  | 0,94520998   | 0 |
| ENSMUSG00000022674 | Ube2v2   | 0,954200029  | 0 |
| ENSMUSG00000022668 | Gtpbp8   | 0,958949983  | 0 |
| ENSMUSG00000020482 | Ccdc117  | 0,964320004  | 0 |
| ENSMUSG00000019861 | Gopc     | 0,991169989  | 0 |
| ENSMUSG00000042202 | Slc35e2  | 1,036759973  | 0 |
| ENSMUSG00000056698 | Elmod3   | 1,04610002   | 0 |
| ENSMUSG00000028719 | Cmpk1    | 1,08336997   | 0 |

|                    |               |             |   |
|--------------------|---------------|-------------|---|
| ENSMUSG00000030983 | Bccip         | 1,13293004  | 0 |
| ENSMUSG00000087385 | Frg2f1        | 1,137420058 | 0 |
| ENSMUSG00000061778 | Mospd2        | 1,152950048 | 0 |
| ENSMUSG00000034035 | Ccdc17        | 1,160150051 | 0 |
| ENSMUSG00000050627 | Gpd1l         | 1,179749966 | 0 |
| ENSMUSG00000027430 | Dtd1          | 1,206740022 | 0 |
| ENSMUSG00000002279 | Lmf1          | 1,226209998 | 0 |
| ENSMUSG00000028538 | St3gal3       | 1,235540032 | 0 |
| ENSMUSG00000020087 | Tysnd1        | 1,239439964 | 0 |
| ENSMUSG00000022843 | Clcn2         | 1,276260018 | 0 |
| ENSMUSG00000032062 | 2310030G06Rik | 1,293709993 | 0 |
| ENSMUSG00000031333 | Abcb7         | 1,342450023 | 0 |
| ENSMUSG00000036985 | Zdhhc9        | 1,342880011 | 0 |
| ENSMUSG00000020829 | Slc46a1       | 1,345510006 | 0 |
| ENSMUSG00000060538 | Tmem219       | 1,352820039 | 0 |
| ENSMUSG00000019872 | Smpdl3a       | 1,359889984 | 0 |
| ENSMUSG00000028015 | Ctso          | 1,390269995 | 0 |
| ENSMUSG00000068299 | Nat8f4        | 1,42245996  | 0 |
| ENSMUSG00000046603 | Tcaim         | 1,433889985 | 0 |
| ENSMUSG00000029311 | Hsd17b11      | 1,447710037 | 0 |
| ENSMUSG00000026888 | Grb14         | 1,493020058 | 0 |
| ENSMUSG00000000708 | Kat2b         | 1,495769978 | 0 |
| ENSMUSG00000046312 | Al464131      | 1,530329943 | 0 |
| ENSMUSG00000022906 | Parp9         | 1,550940037 | 0 |
| ENSMUSG00000030161 | Gabarapl1     | 1,558769941 | 0 |
| ENSMUSG00000025059 | Gk            | 1,561689973 | 0 |
| ENSMUSG00000031938 | 4931406C07Rik | 1,572679996 | 0 |
| ENSMUSG00000025584 | Pde8a         | 1,586989999 | 0 |
| ENSMUSG00000047454 | Gphn          | 1,601979971 | 0 |
| ENSMUSG00000024055 | Cyp4f13       | 1,611039996 | 0 |
| ENSMUSG00000037703 | Lzts3         | 1,614639997 | 0 |
| ENSMUSG00000074093 | Svip          | 1,647369981 | 0 |
| ENSMUSG00000054676 | 1600014C10Rik | 1,649780035 | 0 |
| ENSMUSG00000038068 | Rnf144b       | 1,691879988 | 0 |
| ENSMUSG00000050854 | Tmem125       | 1,773280025 | 0 |
| ENSMUSG00000019851 | Perp          | 1,824699998 | 0 |
| ENSMUSG00000032114 | Slc37a4       | 1,881459951 | 0 |
| ENSMUSG00000073565 | Prr16         | 1,888399959 | 0 |
| ENSMUSG00000038195 | Rilp          | 1,897869945 | 0 |
| ENSMUSG00000031958 | Ldhd          | 1,929640055 | 0 |
| ENSMUSG00000025207 | Sema4g        | 1,933519959 | 0 |
| ENSMUSG00000031770 | Herpud1       | 1,946779966 | 0 |
| ENSMUSG00000046027 | Stard5        | 2,032380104 | 0 |
| ENSMUSG00000035473 | Galm          | 2,052289963 | 0 |
| ENSMUSG00000031379 | Pir           | 2,056890011 | 0 |
| ENSMUSG00000052117 | D630039A03Rik | 2,068890095 | 0 |
| ENSMUSG00000020534 | Shmt1         | 2,078219891 | 0 |

|                    |           |              |   |
|--------------------|-----------|--------------|---|
| ENSMUSG00000037826 | Ppm1k     | 2,088690042  | 0 |
| ENSMUSG00000019312 | Grb7      | 2,098259926  | 0 |
| ENSMUSG00000042073 | Abhd14b   | 2,098279953  | 0 |
| ENSMUSG00000025911 | Adhfe1    | 2,110769987  | 0 |
| ENSMUSG00000031482 | Slc25a15  | 2,142119884  | 0 |
| ENSMUSG00000028434 | Epb41l4b  | 2,143870115  | 0 |
| ENSMUSG00000050103 | Agmo      | 2,181519985  | 0 |
| ENSMUSG00000034285 | Nipsnap1  | 2,239769936  | 0 |
| ENSMUSG00000005951 | Shpk      | 2,241100073  | 0 |
| ENSMUSG00000059022 | Kcp       | 2,270309925  | 0 |
| ENSMUSG00000027261 | Hao1      | 2,277640104  | 0 |
| ENSMUSG00000042797 | Aqp11     | 2,282749891  | 0 |
| ENSMUSG00000005268 | Prlr      | 2,326570034  | 0 |
| ENSMUSG00000020672 | Sntg2     | 2,335180044  | 0 |
| ENSMUSG00000034171 | Faah      | 2,351910114  | 0 |
| ENSMUSG00000073988 | Ttpa      | 2,422339916  | 0 |
| ENSMUSG00000031596 | Slc7a2    | 2,437459946  | 0 |
| ENSMUSG00000030137 | Tuba8     | 2,451509953  | 0 |
| ENSMUSG00000024039 | Cbs       | 2,470789909  | 0 |
| ENSMUSG00000001604 | Tcea3     | 2,479219913  | 0 |
| ENSMUSG00000021884 | Hacl1     | 2,485059977  | 0 |
| ENSMUSG00000060183 | Cxcl11    | 2,485470057  | 0 |
| ENSMUSG00000033308 | Dpyd      | 2,490279913  | 0 |
| ENSMUSG00000002985 | Apoe      | 2,525369883  | 0 |
| ENSMUSG00000039653 | Baat      | 2,526400089  | 0 |
| ENSMUSG00000042102 | Dmgdh     | 2,550970078  | 0 |
| ENSMUSG00000028553 | Angptl3   | 2,568109989  | 0 |
| ENSMUSG00000022323 | Rida      | 2,707730055  | 0 |
| ENSMUSG00000020419 | Hormad2   | 2,708570004  | 0 |
| ENSMUSG00000041119 | Pde9a     | 2,753599882  | 0 |
| ENSMUSG00000029864 | Gstk1     | 2,765160084  | 0 |
| ENSMUSG00000027513 | Pck1      | 2,85807991   | 0 |
| ENSMUSG00000079015 | Serpina1c | 2,903759956  | 0 |
| ENSMUSG00000057400 | Ces1c     | 2,923919916  | 0 |
| ENSMUSG00000036892 | Prodh2    | 2,943979979  | 0 |
| ENSMUSG00000059908 | Mug1      | 2,960239887  | 0 |
| ENSMUSG00000052562 | Slc22a30  | 2,969199896  | 0 |
| ENSMUSG00000032500 | Dcl3      | 3,135699987  | 0 |
| ENSMUSG00000028786 | Tmem54    | 3,297049999  | 0 |
| ENSMUSG00000027556 | Car1      | 3,425080061  | 0 |
| ENSMUSG00000041468 | Gpr12     | 3,951299906  | 0 |
| ENSMUSG00000058589 | Anks1b    | -10,3009901  | 0 |
| ENSMUSG00000045871 | Slitrk6   | -10,21829987 | 0 |
| ENSMUSG00000020598 | Nrcam     | -8,546380043 | 0 |
| ENSMUSG00000051323 | Pcdh19    | -7,510109901 | 0 |
| ENSMUSG00000029644 | Pdx1      | -7,406740189 | 0 |
| ENSMUSG00000032373 | Car12     | -6,669260025 | 0 |

|                    |           |              |   |
|--------------------|-----------|--------------|---|
| ENSMUSG00000037962 | Rflna     | -6,223330021 | 0 |
| ENSMUSG00000027377 | Mall      | -5,733300209 | 0 |
| ENSMUSG00000024112 | Cacna1h   | -5,698929787 | 0 |
| ENSMUSG00000020325 | Fstl3     | -5,628009796 | 0 |
| ENSMUSG00000000416 | Cttnbp2   | -4,767859936 | 0 |
| ENSMUSG00000037196 | Pacrg     | -3,778719902 | 0 |
| ENSMUSG00000014813 | Stc1      | -3,552969933 | 0 |
| ENSMUSG00000050075 | Gpr171    | -3,424649954 | 0 |
| ENSMUSG00000028613 | Lrp8      | -3,369590044 | 0 |
| ENSMUSG00000013921 | Clip3     | -3,244210005 | 0 |
| ENSMUSG00000071537 | Klrg2     | -3,233730078 | 0 |
| ENSMUSG00000042766 | Trim46    | -3,14654994  | 0 |
| ENSMUSG00000031530 | Dusp4     | -3,100159883 | 0 |
| ENSMUSG00000027408 | Cpxm1     | -3,007980108 | 0 |
| ENSMUSG00000052957 | Gas1      | -2,879430056 | 0 |
| ENSMUSG00000045394 | Epcam     | -2,806930065 | 0 |
| ENSMUSG00000078794 | Dact3     | -2,788019896 | 0 |
| ENSMUSG00000036768 | Kif15     | -2,704289913 | 0 |
| ENSMUSG00000008318 | Relt      | -2,627059937 | 0 |
| ENSMUSG00000050248 | Evc2      | -2,579819918 | 0 |
| ENSMUSG00000026478 | Lamc1     | -2,465490103 | 0 |
| ENSMUSG00000031506 | Ptpn7     | -2,437239885 | 0 |
| ENSMUSG00000063160 | Numb1     | -2,402960062 | 0 |
| ENSMUSG00000037206 | Islr      | -2,353339911 | 0 |
| ENSMUSG00000029778 | Adcyap1r1 | -2,34732008  | 0 |
| ENSMUSG00000048482 | Bdnf      | -2,294470072 | 0 |
| ENSMUSG00000027201 | Myef2     | -2,224509954 | 0 |
| ENSMUSG00000039943 | Plcb4     | -2,220170021 | 0 |
| ENSMUSG00000015501 | Hivep2    | -2,17866993  | 0 |
| ENSMUSG00000072214 | Sept5     | -2,136970043 | 0 |
| ENSMUSG00000024427 | Spry4     | -2,070899963 | 0 |
| ENSMUSG00000056612 | Ppp1r14b  | -2,067169905 | 0 |
| ENSMUSG00000027329 | Spef1     | -2,059639931 | 0 |
| ENSMUSG00000005986 | Ankrd13d  | -2,030040026 | 0 |
| ENSMUSG00000017697 | Ada       | -1,95480001  | 0 |
| ENSMUSG00000022221 | Ripk3     | -1,892570019 | 0 |
| ENSMUSG00000041219 | Arhgap11a | -1,85165     | 0 |
| ENSMUSG00000025558 | Dock9     | -1,823199987 | 0 |
| ENSMUSG00000037860 | Aim2      | -1,794440031 | 0 |
| ENSMUSG00000022665 | Ccdc80    | -1,77373004  | 0 |
| ENSMUSG00000025758 | Plk4      | -1,735990047 | 0 |
| ENSMUSG00000022332 | Khdrbs3   | -1,715579987 | 0 |
| ENSMUSG00000022378 | Fam49b    | -1,68453002  | 0 |
| ENSMUSG00000033669 | Zfp7      | -1,61827004  | 0 |
| ENSMUSG00000021457 | Syk       | -1,469699979 | 0 |
| ENSMUSG00000022246 | Rai14     | -1,460659981 | 0 |
| ENSMUSG00000024613 | Tcof1     | -1,459280014 | 0 |

|                     |            |              |   |
|---------------------|------------|--------------|---|
| ENSMUSG00000000957  | Mmp14      | -1,426309943 | 0 |
| ENSMUSG00000049807  | Arhgap23   | -1,397259951 | 0 |
| ENSMUSG00000001016  | Ilf2       | -1,344980001 | 0 |
| ENSMUSG000000034761 | Map4k5     | -1,334050059 | 0 |
| ENSMUSG000000061689 | Dlgap4     | -1,321589947 | 0 |
| ENSMUSG000000033373 | Fntb       | -1,250640035 | 0 |
| ENSMUSG000000047824 | Pygo2      | -1,20547998  | 0 |
| ENSMUSG000000037243 | Zfp692     | -1,203570008 | 0 |
| ENSMUSG000000028896 | Rcc1       | -1,148910046 | 0 |
| ENSMUSG000000068917 | Clk2       | -1,116549969 | 0 |
| ENSMUSG000000028849 | Map7d1     | -1,088400006 | 0 |
| ENSMUSG000000025066 | Sfr1       | -1,085569978 | 0 |
| ENSMUSG000000040043 | Rbms2      | -1,025339961 | 0 |
| ENSMUSG000000021820 | Camk2g     | -1,021270037 | 0 |
| ENSMUSG000000021549 | Rasa1      | -1,020760059 | 0 |
| ENSMUSG000000018974 | Sart3      | -0,955079973 | 0 |
| ENSMUSG000000026020 | Nop58      | -0,952400029 | 0 |
| ENSMUSG000000066640 | Fbxl18     | -0,852479994 | 0 |
| ENSMUSG000000027522 | Stx16      | -0,826659977 | 0 |
| ENSMUSG000000039756 | Dnttip2    | -0,762809992 | 0 |
| ENSMUSG000000029777 | Gars       | -0,75654     | 0 |
| ENSMUSG000000025782 | Taf3       | -0,754639983 | 0 |
| ENSMUSG000000019432 | Ddx39b     | -0,704370022 | 0 |
| ENSMUSG000000042354 | Gnl3       | -0,685500026 | 0 |
| ENSMUSG000000003458 | Ncstn      | -0,673640013 | 0 |
| ENSMUSG000000004865 | Srpk1      | -0,671959996 | 0 |
| ENSMUSG000000018171 | Vmp1       | -0,65030998  | 0 |
| ENSMUSG000000027122 | Arl14ep    | -0,590110004 | 0 |
| ENSMUSG000000020134 | Peli1      | 0,652130008  | 0 |
| ENSMUSG000000030691 | Fchsd2     | 0,81013      | 0 |
| ENSMUSG000000032120 | C2cd2l     | 0,87816      | 0 |
| ENSMUSG000000046798 | Cldn12     | 0,879480004  | 0 |
| ENSMUSG000000053769 | Lysmd1     | 0,920249999  | 0 |
| ENSMUSG000000012117 | Dhdds      | 0,933510005  | 0 |
| ENSMUSG000000022848 | Dirc2      | 1,018959999  | 0 |
| ENSMUSG000000038240 | Pdss2      | 1,03508997   | 0 |
| ENSMUSG000000062031 | Pgghg      | 1,05945003   | 0 |
| ENSMUSG000000034449 | Dhrs11     | 1,072260022  | 0 |
| ENSMUSG000000028343 | Erp44      | 1,109990001  | 0 |
| ENSMUSG000000022361 | Zhx1       | 1,111410022  | 0 |
| ENSMUSG000000020743 | Mif4gd     | 1,114289999  | 0 |
| ENSMUSG000000066735 | Vkorc1l1   | 1,125460029  | 0 |
| ENSMUSG000000025766 | D3ErtD751e | 1,151980042  | 0 |
| ENSMUSG000000019864 | Rtn4ip1    | 1,217389941  | 0 |
| ENSMUSG000000023010 | Tmbim6     | 1,300500035  | 0 |
| ENSMUSG000000020376 | Rnf130     | 1,31693995   | 0 |
| ENSMUSG000000025198 | Erlin1     | 1,337649941  | 0 |



|                     |               |              |   |
|---------------------|---------------|--------------|---|
| ENSMUSG00000019478  | Rab4a         | 1,352789998  | 0 |
| ENSMUSG00000018442  | Derl2         | 1,353469968  | 0 |
| ENSMUSG00000022663  | Atg3          | 1,355530024  | 0 |
| ENSMUSG000000052914 | Cyp2j6        | 1,388589978  | 0 |
| ENSMUSG000000045795 | Whamm         | 1,424900055  | 0 |
| ENSMUSG000000053897 | Slc39a8       | 1,538400054  | 0 |
| ENSMUSG000000025854 | Fam20c        | 1,55369997   | 0 |
| ENSMUSG000000022707 | Gbe1          | 1,66129005   | 0 |
| ENSMUSG000000022253 | Nadk2         | 1,668329954  | 0 |
| ENSMUSG000000020878 | Lrrc46        | 1,723749995  | 0 |
| ENSMUSG000000025137 | Pcyt2         | 1,752120018  | 0 |
| ENSMUSG000000024158 | Hagh          | 1,779150009  | 0 |
| ENSMUSG000000079659 | Tmem243       | 1,782410026  | 0 |
| ENSMUSG000000074064 | Mlycd         | 1,796569943  | 0 |
| ENSMUSG000000039529 | Atp8b1        | 1,824090004  | 0 |
| ENSMUSG000000038515 | Grtp1         | 1,874780059  | 0 |
| ENSMUSG000000005107 | Slc2a9        | 2,029690027  | 0 |
| ENSMUSG000000054474 | Thnsl2        | 2,109970093  | 0 |
| ENSMUSG000000028603 | Scp2          | 2,180670023  | 0 |
| ENSMUSG000000020098 | Pcbd1         | 2,183979988  | 0 |
| ENSMUSG000000038422 | Hdhd3         | 2,202320099  | 0 |
| ENSMUSG000000045294 | Insig1        | 2,302839994  | 0 |
| ENSMUSG000000039632 | Ccdc151       | 2,327950001  | 0 |
| ENSMUSG000000052520 | Cyp2j5        | 2,403140068  | 0 |
| ENSMUSG000000015843 | Rxrg          | 2,465389967  | 0 |
| ENSMUSG000000025213 | Kazald1       | 2,469540119  | 0 |
| ENSMUSG000000022868 | Ahsg          | 2,524669886  | 0 |
| ENSMUSG000000031489 | Adrb3         | 2,592530012  | 0 |
| ENSMUSG000000069805 | Fbp1          | 2,645709991  | 0 |
| ENSMUSG000000059325 | Hopx          | 2,70442009   | 0 |
| ENSMUSG000000029368 | Alb           | 2,737879992  | 0 |
| ENSMUSG000000040564 | Apoc1         | 2,912230015  | 0 |
| ENSMUSG000000061808 | Ttr           | 2,954240084  | 0 |
| ENSMUSG000000038135 | Crygn         | 3,102619886  | 0 |
| ENSMUSG000000036377 | C530008M17Rik | -6,533530235 | 0 |
| ENSMUSG000000031760 | Mt3           | -6,362430096 | 0 |
| ENSMUSG000000030017 | Reg3g         | -5,926000118 | 0 |
| ENSMUSG000000064272 | Gpbar1        | -5,718699932 | 0 |
| ENSMUSG000000028524 | Sgip1         | -5,133999825 | 0 |
| ENSMUSG000000079445 | B3gnt7        | -4,812409878 | 0 |
| ENSMUSG000000054256 | Msi1          | -4,542240143 | 0 |
| ENSMUSG000000061603 | Akap6         | -4,285580158 | 0 |
| ENSMUSG000000056486 | Chn1          | -4,104010105 | 0 |
| ENSMUSG000000070524 | Fcrlb         | -3,721379995 | 0 |
| ENSMUSG000000046191 | Pcdhb20       | -3,571480036 | 0 |
| ENSMUSG000000073591 | Pcdhb22       | -3,519769907 | 0 |
| ENSMUSG000000032192 | Gnb5          | -3,290450096 | 0 |

|                    |               |              |   |
|--------------------|---------------|--------------|---|
| ENSMUSG00000056870 | Gulp1         | -3,217109919 | 0 |
| ENSMUSG00000031442 | Mcf2l         | -3,173810005 | 0 |
| ENSMUSG00000029304 | Spp1          | -3,002350092 | 0 |
| ENSMUSG00000020185 | E2f7          | -2,860780001 | 0 |
| ENSMUSG00000031659 | Adcy7         | -2,585150003 | 0 |
| ENSMUSG00000020227 | Irak3         | -2,526070118 | 0 |
| ENSMUSG00000032849 | Abcc4         | -2,406780005 | 0 |
| ENSMUSG00000030589 | Rasgrp4       | -2,352070093 | 0 |
| ENSMUSG00000044906 | 4930503L19Rik | -2,332870007 | 0 |
| ENSMUSG00000044551 | 9930012K11Rik | -2,299190044 | 0 |
| ENSMUSG00000041773 | Enc1          | -2,168849945 | 0 |
| ENSMUSG00000046768 | Rhoj          | -1,812770009 | 0 |
| ENSMUSG00000024776 | Stambpl1      | -1,791319966 | 0 |
| ENSMUSG00000039959 | Hip1          | -1,78234005  | 0 |
| ENSMUSG00000040710 | St8sia4       | -1,680660009 | 0 |
| ENSMUSG00000021180 | Rps6ka5       | -1,66960001  | 0 |
| ENSMUSG00000018395 | Kif3a         | -1,654510021 | 0 |
| ENSMUSG00000055805 | Fmnl1         | -1,640560031 | 0 |
| ENSMUSG00000020023 | Tmcc3         | -1,631800056 | 0 |
| ENSMUSG00000037315 | Jade3         | -1,562479973 | 0 |
| ENSMUSG00000040549 | Ckap5         | -1,496320009 | 0 |
| ENSMUSG00000004317 | Clcn5         | -1,459489942 | 0 |
| ENSMUSG00000059248 | Sept9         | -1,459169984 | 0 |
| ENSMUSG00000032577 | Mapkap3       | -1,449190021 | 0 |
| ENSMUSG00000012076 | Brms1l        | -1,443249941 | 0 |
| ENSMUSG00000028955 | Vamp3         | -1,379760027 | 0 |
| ENSMUSG00000023994 | Nfya          | -1,322780013 | 0 |
| ENSMUSG00000026655 | Fam107b       | -1,31043005  | 0 |
| ENSMUSG00000079109 | Pms2          | -1,310340047 | 0 |
| ENSMUSG00000038116 | Phf20         | -1,28737998  | 0 |
| ENSMUSG00000051934 | Spats2        | -1,262249947 | 0 |
| ENSMUSG00000011179 | Odc1          | -1,246829987 | 0 |
| ENSMUSG00000005656 | Snx6          | -1,075350046 | 0 |
| ENSMUSG00000031928 | Mre11a        | -1,043499947 | 0 |
| ENSMUSG00000042138 | Msantd2       | -1,032070041 | 0 |
| ENSMUSG00000026456 | Cyb5r1        | -1,000239968 | 0 |
| ENSMUSG00000028771 | Ptpn12        | -0,966509998 | 0 |
| ENSMUSG00000049327 | Kmt5a         | -0,965839982 | 0 |
| ENSMUSG00000024563 | Smad2         | -0,772459984 | 0 |
| ENSMUSG00000031601 | Cnot7         | -0,758249998 | 0 |
| ENSMUSG00000037993 | Dhx38         | -0,739449978 | 0 |
| ENSMUSG00000029781 | Fkbp9         | -0,714299977 | 0 |
| ENSMUSG00000018583 | G3bp1         | -0,683499992 | 0 |
| ENSMUSG00000029569 | Tmem168       | 0,454640001  | 0 |
| ENSMUSG00000070426 | Rnf121        | 0,582539976  | 0 |
| ENSMUSG00000030801 | Kat8          | 0,662249982  | 0 |
| ENSMUSG00000027531 | Impa1         | 0,743939996  | 0 |

|                    |          |              |         |
|--------------------|----------|--------------|---------|
| ENSMUSG00000021484 | Lman2    | 0,795580029  | 0       |
| ENSMUSG00000040774 | Cept1    | 0,807799995  | 0       |
| ENSMUSG00000066151 | Fkbp15   | 0,864369988  | 0       |
| ENSMUSG00000029125 | Stx18    | 0,870909989  | 0       |
| ENSMUSG00000042608 | Stk40    | 0,877059996  | 0       |
| ENSMUSG00000016510 | Mtif3    | 0,987020016  | 0       |
| ENSMUSG00000028952 | Zbtb48   | 0,987879992  | 0       |
| ENSMUSG00000049287 | Iba57    | 1,117820024  | 0       |
| ENSMUSG00000035469 | Rcctb1   | 1,191220045  | 0       |
| ENSMUSG00000038982 | Bloc1s5  | 1,266090035  | 0       |
| ENSMUSG00000038507 | Parp12   | 1,421730042  | 0       |
| ENSMUSG00000037936 | Scarb1   | 1,427860022  | 0       |
| ENSMUSG00000015536 | Mocs2    | 1,492490053  | 0       |
| ENSMUSG00000060002 | Chpt1    | 1,612650037  | 0       |
| ENSMUSG00000037847 | Nmrk1    | 1,648000002  | 0       |
| ENSMUSG00000057054 | Inca1    | 1,693130016  | 0       |
| ENSMUSG00000041650 | Pcca     | 1,807029963  | 0       |
| ENSMUSG00000046879 | Irgm1    | 1,874169946  | 0       |
| ENSMUSG00000021947 | Cryl1    | 2,009000063  | 0       |
| ENSMUSG00000042770 | Hebp1    | 2,129810095  | 0       |
| ENSMUSG00000040181 | Fmo1     | 2,242680073  | 0       |
| ENSMUSG00000020102 | Slc16a7  | 2,253240108  | 0       |
| ENSMUSG00000009281 | Rarres2  | 2,25612998   | 0       |
| ENSMUSG00000058952 | Cfi      | 2,308670044  | 0       |
| ENSMUSG00000035540 | Gc       | 2,31923008   | 0       |
| ENSMUSG00000057228 | Aadat    | 2,34987998   | 0       |
| ENSMUSG00000094806 | Cyp2d10  | 2,375880003  | 0       |
| ENSMUSG00000025279 | Dnase1l3 | 2,424720049  | 0       |
| ENSMUSG00000042118 | Bhmt2    | 2,45449996   | 0       |
| ENSMUSG00000028681 | Ptch2    | 2,457890034  | 0       |
| ENSMUSG00000028307 | Aldob    | 2,518630028  | 0       |
| ENSMUSG00000037798 | Mat1a    | 2,602129936  | 0       |
| ENSMUSG00000057103 | Nat8f1   | 2,627680063  | 0       |
| ENSMUSG00000041930 | Fam222a  | 2,638499975  | 0       |
| ENSMUSG00000029162 | Khk      | 2,686019897  | 0       |
| ENSMUSG00000051497 | Kcnj16   | 2,769629955  | 0       |
| ENSMUSG00000040127 | Sdr9c7   | 3,513210058  | 0       |
| ENSMUSG00000026535 | Ifi202b  | 4,407969952  | 0       |
| ENSMUSG00000060981 | Hist1h4h | -2,987459898 | 0       |
| ENSMUSG00000031697 | Orc6     | -2,032160044 | 0       |
| ENSMUSG00000056899 | Immp2l   | 1,801489949  | 0       |
| ENSMUSG00000001666 | Ddt      | 2,080980062  | 0       |
| ENSMUSG00000071847 | Apcdd1   | -9,24104023  | 0,00001 |
| ENSMUSG00000031994 | Adamts8  | -6,541619778 | 0,00001 |
| ENSMUSG00000063975 | Slco1a5  | -6,473430157 | 0,00001 |
| ENSMUSG00000056900 | Usp13    | -6,44671011  | 0,00001 |
| ENSMUSG00000061186 | Sfmbt2   | -4,77918005  | 0,00001 |

|                    |               |              |         |
|--------------------|---------------|--------------|---------|
| ENSMUSG00000038677 | Scube3        | -3,567810059 | 0,00001 |
| ENSMUSG00000034981 | Parm1         | -2,935270071 | 0,00001 |
| ENSMUSG0000004098  | Col5a3        | -2,706330061 | 0,00001 |
| ENSMUSG00000040219 | Ttc12         | -2,690900087 | 0,00001 |
| ENSMUSG00000053398 | Phgdh         | -2,568380117 | 0,00001 |
| ENSMUSG00000014837 | 4931428F04Rik | -2,49729991  | 0,00001 |
| ENSMUSG00000029061 | Mmp23         | -2,443739891 | 0,00001 |
| ENSMUSG00000002835 | Chaf1a        | -2,281960011 | 0,00001 |
| ENSMUSG00000056724 | Nbeal2        | -2,039700031 | 0,00001 |
| ENSMUSG00000032322 | Pstpip1       | -1,967620015 | 0,00001 |
| ENSMUSG00000030255 | Sspn          | -1,966850042 | 0,00001 |
| ENSMUSG00000023571 | C1qtnf12      | -1,908959985 | 0,00001 |
| ENSMUSG00000025287 | Acot9         | -1,818910003 | 0,00001 |
| ENSMUSG00000018819 | Lsp1          | -1,790210009 | 0,00001 |
| ENSMUSG00000040860 | Crocc         | -1,779760003 | 0,00001 |
| ENSMUSG00000025231 | Sufu          | -1,658220053 | 0,00001 |
| ENSMUSG00000040312 | Cchr1         | -1,518749952 | 0,00001 |
| ENSMUSG00000042050 | Wdr60         | -1,509269953 | 0,00001 |
| ENSMUSG00000095115 | Itpril2       | -1,453799963 | 0,00001 |
| ENSMUSG00000024299 | Adamts10      | -1,429290056 | 0,00001 |
| ENSMUSG00000018537 | Pcgf2         | -1,402799964 | 0,00001 |
| ENSMUSG00000047409 | Ctdspl        | -1,310610056 | 0,00001 |
| ENSMUSG00000055044 | Pdlim1        | -1,288550019 | 0,00001 |
| ENSMUSG00000020807 | 4933427D14Rik | -1,267310023 | 0,00001 |
| ENSMUSG00000079555 | Haus3         | -1,202659965 | 0,00001 |
| ENSMUSG00000020392 | Cdkn2aipnl    | -1,102740049 | 0,00001 |
| ENSMUSG00000030095 | Tmem43        | -1,087970018 | 0,00001 |
| ENSMUSG00000059586 | Nsmce2        | -1,078889966 | 0,00001 |
| ENSMUSG00000067787 | Blcap         | -1,070749998 | 0,00001 |
| ENSMUSG00000021969 | Zdhhc20       | -1,031479955 | 0,00001 |
| ENSMUSG00000028431 | Elp1          | -0,994830012 | 0,00001 |
| ENSMUSG00000028016 | Ints12        | -0,974780023 | 0,00001 |
| ENSMUSG00000042203 | Tbc1d22b      | -0,925949991 | 0,00001 |
| ENSMUSG00000008958 | Vps72         | -0,883719981 | 0,00001 |
| ENSMUSG00000029176 | Anapc4        | -0,805060029 | 0,00001 |
| ENSMUSG00000055371 | Stam2         | -0,620649993 | 0,00001 |
| ENSMUSG00000034216 | Vps18         | -0,510280013 | 0,00001 |
| ENSMUSG00000040859 | Bsd1          | 0,688080013  | 0,00001 |
| ENSMUSG00000014077 | Chp1          | 0,797540009  | 0,00001 |
| ENSMUSG00000047635 | 2810006K23Rik | 0,811179996  | 0,00001 |
| ENSMUSG00000043831 | Lysmd4        | 0,877399981  | 0,00001 |
| ENSMUSG00000022261 | Sdc2          | 0,944700003  | 0,00001 |
| ENSMUSG00000032434 | Cmtm6         | 1,005900025  | 0,00001 |
| ENSMUSG00000035521 | Gnptg         | 1,096670032  | 0,00001 |
| ENSMUSG00000021054 | Sgpp1         | 1,128409982  | 0,00001 |
| ENSMUSG00000031438 | Rnf128        | 1,222859979  | 0,00001 |
| ENSMUSG00000020484 | Xbp1          | 1,343880057  | 0,00001 |

|                    |               |              |         |
|--------------------|---------------|--------------|---------|
| ENSMUSG00000014791 | Elmo3         | 1,364979982  | 0,00001 |
| ENSMUSG00000064345 | mt-Nd2        | 1,393219948  | 0,00001 |
| ENSMUSG00000031337 | Mtm1          | 1,479979992  | 0,00001 |
| ENSMUSG00000075590 | Nrbp2         | 1,686720014  | 0,00001 |
| ENSMUSG00000060512 | 0610040J01Rik | 1,731019974  | 0,00001 |
| ENSMUSG00000067212 | H2-T23        | 1,784459949  | 0,00001 |
| ENSMUSG00000043639 | Rbm20         | 1,806339979  | 0,00001 |
| ENSMUSG00000057069 | Ero1lb        | 1,81637001   | 0,00001 |
| ENSMUSG00000042216 | Sgsm1         | 1,853199959  | 0,00001 |
| ENSMUSG00000020553 | Pctp          | 1,876350045  | 0,00001 |
| ENSMUSG00000050270 | Tmem220       | 1,894500017  | 0,00001 |
| ENSMUSG00000025176 | Hoga1         | 2,14696002   | 0,00001 |
| ENSMUSG00000027792 | Bche          | 2,231950045  | 0,00001 |
| ENSMUSG00000030630 | Fah           | 2,355190039  | 0,00001 |
| ENSMUSG00000034528 | Hsd17b13      | 2,427580118  | 0,00001 |
| ENSMUSG00000036813 | Entpd8        | 2,471820116  | 0,00001 |
| ENSMUSG00000036083 | Slc17a3       | 2,606549978  | 0,00001 |
| ENSMUSG00000038526 | Car14         | 2,661489964  | 0,00001 |
| ENSMUSG00000022821 | Hgd           | 2,667109966  | 0,00001 |
| ENSMUSG00000023073 | Slc10a2       | 2,806550026  | 0,00001 |
| ENSMUSG00000002769 | Gnmt          | 2,816930056  | 0,00001 |
| ENSMUSG00000030834 | Abcc6         | 2,846689939  | 0,00001 |
| ENSMUSG00000032081 | Apoc3         | 3,013439894  | 0,00001 |
| ENSMUSG00000035681 | Kcnc2         | -9,970689774 | 0,00001 |
| ENSMUSG00000040836 | Gpr161        | -7,886869907 | 0,00001 |
| ENSMUSG00000008658 | Rbfox1        | -7,694749832 | 0,00001 |
| ENSMUSG00000045275 | Lca5l         | -5,241030216 | 0,00001 |
| ENSMUSG00000040387 | Klhl32        | -4,706799984 | 0,00001 |
| ENSMUSG00000070509 | Rgma          | -4,006410122 | 0,00001 |
| ENSMUSG00000021567 | Nkd2          | -3,655790091 | 0,00001 |
| ENSMUSG00000040728 | Esrp1         | -3,491050005 | 0,00001 |
| ENSMUSG00000032507 | Fbxl2         | -3,432339907 | 0,00001 |
| ENSMUSG00000012350 | Ehf           | -3,282119989 | 0,00001 |
| ENSMUSG00000020388 | Pdlim4        | -3,043869972 | 0,00001 |
| ENSMUSG00000036136 | Fam110c       | -2,614500046 | 0,00001 |
| ENSMUSG00000032254 | Kif23         | -2,586400032 | 0,00001 |
| ENSMUSG00000002997 | Prkar2b       | -2,40989995  | 0,00001 |
| ENSMUSG00000078771 | Evi2a         | -2,135499954 | 0,00001 |
| ENSMUSG00000038205 | Prkab2        | -2,089970112 | 0,00001 |
| ENSMUSG00000031465 | Angpt2        | -2,009299994 | 0,00001 |
| ENSMUSG00000034765 | Dusp5         | -1,941859961 | 0,00001 |
| ENSMUSG00000031840 | Rab3a         | -1,675740004 | 0,00001 |
| ENSMUSG00000059498 | Fcgr3         | -1,669090033 | 0,00001 |
| ENSMUSG00000097052 | Snora43       | -1,578590035 | 0,00001 |
| ENSMUSG00000015950 | Ncf1          | -1,498460054 | 0,00001 |
| ENSMUSG00000035673 | Sbno2         | -1,446140051 | 0,00001 |
| ENSMUSG00000037907 | Ankrd13b      | -1,435950041 | 0,00001 |

|                    |               |              |         |
|--------------------|---------------|--------------|---------|
| ENSMUSG00000019998 | Stx7          | -1,227779984 | 0,00001 |
| ENSMUSG00000033589 | Reep4         | -1,197360039 | 0,00001 |
| ENSMUSG00000021481 | Zfp346        | -1,063850045 | 0,00001 |
| ENSMUSG00000023051 | Tarbp2        | -1,009610057 | 0,00001 |
| ENSMUSG00000063273 | Naa15         | -0,87598002  | 0,00001 |
| ENSMUSG00000002658 | Gtf2f1        | -0,869930029 | 0,00001 |
| ENSMUSG00000017615 | Tnfaip1       | -0,589330018 | 0,00001 |
| ENSMUSG00000024740 | Ddb1          | -0,511049986 | 0,00001 |
| ENSMUSG00000026276 | Sept2         | -0,51019001  | 0,00001 |
| ENSMUSG00000025428 | Atp5a1        | 0,65753001   | 0,00001 |
| ENSMUSG00000039048 | Foxred1       | 0,808319986  | 0,00001 |
| ENSMUSG00000037295 | Ldlrap1       | 0,947640002  | 0,00001 |
| ENSMUSG00000032788 | Pdxk          | 1,080109954  | 0,00001 |
| ENSMUSG00000021982 | Cdad1         | 1,125560045  | 0,00001 |
| ENSMUSG00000034379 | Wdr5b         | 1,168120027  | 0,00001 |
| ENSMUSG00000071632 | 2510002D24Rik | 1,236909986  | 0,00001 |
| ENSMUSG00000070780 | Rbm47         | 1,297930002  | 0,00001 |
| ENSMUSG00000027809 | Etfdh         | 1,303760052  | 0,00001 |
| ENSMUSG00000021252 | Erg28         | 1,326349974  | 0,00001 |
| ENSMUSG00000028199 | Cryz          | 1,355180025  | 0,00001 |
| ENSMUSG00000001755 | Coasy         | 1,376889944  | 0,00001 |
| ENSMUSG00000038459 | Abhd17c       | 1,395789981  | 0,00001 |
| ENSMUSG00000024026 | Glo1          | 1,408499956  | 0,00001 |
| ENSMUSG00000036944 | Tmem71        | 1,441769958  | 0,00001 |
| ENSMUSG00000027822 | Slc33a1       | 1,443179965  | 0,00001 |
| ENSMUSG00000025465 | Echs1         | 1,523419976  | 0,00001 |
| ENSMUSG00000069835 | Sat2          | 1,836290002  | 0,00001 |
| ENSMUSG00000041132 | N4bp2l1       | 1,908519983  | 0,00001 |
| ENSMUSG00000020538 | Srebf1        | 1,913660049  | 0,00001 |
| ENSMUSG00000009378 | Slc16a12      | 2,021529913  | 0,00001 |
| ENSMUSG00000028737 | Aldh4a1       | 2,092780113  | 0,00001 |
| ENSMUSG00000022540 | Rogdi         | 2,099940062  | 0,00001 |
| ENSMUSG00000024646 | Cyb5a         | 2,128420115  | 0,00001 |
| ENSMUSG00000032207 | Lipc          | 2,169159889  | 0,00001 |
| ENSMUSG00000026819 | Slc25a25      | 2,188570023  | 0,00001 |
| ENSMUSG00000020072 | Pbld2         | 2,283279896  | 0,00001 |
| ENSMUSG00000031845 | Bco1          | 2,296279907  | 0,00001 |
| ENSMUSG00000079012 | Serpina3m     | 2,323630095  | 0,00001 |
| ENSMUSG00000037053 | Azgp1         | 2,428800106  | 0,00001 |
| ENSMUSG00000040134 | Rdh7          | 2,492460012  | 0,00001 |
| ENSMUSG00000006529 | Itih1         | 2,500699997  | 0,00001 |
| ENSMUSG00000030109 | Slc6a12       | 2,572109938  | 0,00001 |
| ENSMUSG00000056035 | Cyp3a11       | 2,660809994  | 0,00001 |
| ENSMUSG00000055782 | Abcd2         | 2,718689919  | 0,00001 |
| ENSMUSG00000027820 | Mme           | 2,784929991  | 0,00001 |
| ENSMUSG00000032083 | Apoa1         | 2,940229893  | 0,00001 |
| ENSMUSG00000026839 | Upp2          | 3,224980116  | 0,00001 |

|                    |          |              |         |
|--------------------|----------|--------------|---------|
| ENSMUSG00000066072 | Cyp4a10  | 3,292020082  | 0,00001 |
| ENSMUSG00000020181 | Nav3     | -10,44806004 | 0,00001 |
| ENSMUSG00000047842 | Diras2   | -7,924930096 | 0,00001 |
| ENSMUSG00000079186 | Gzmc     | -6,696280003 | 0,00001 |
| ENSMUSG00000059430 | Actg2    | -4,752099991 | 0,00001 |
| ENSMUSG00000048915 | Efna5    | -3,458329916 | 0,00001 |
| ENSMUSG00000040133 | Gpr176   | -3,275490046 | 0,00001 |
| ENSMUSG00000033949 | Trim36   | -3,274590015 | 0,00001 |
| ENSMUSG00000035279 | Ssc5d    | -3,188990116 | 0,00001 |
| ENSMUSG00000039748 | Exo1     | -2,891979933 | 0,00001 |
| ENSMUSG00000039774 | Galnt12  | -2,647579908 | 0,00001 |
| ENSMUSG00000020914 | Top2a    | -2,171050072 | 0,00001 |
| ENSMUSG00000000028 | Cdc45    | -1,930870056 | 0,00001 |
| ENSMUSG00000031827 | Cotl1    | -1,878110051 | 0,00001 |
| ENSMUSG00000038780 | Smurf1   | -1,46333003  | 0,00001 |
| ENSMUSG00000058392 | Rrp1b    | -1,348060012 | 0,00001 |
| ENSMUSG00000032413 | Rasa2    | -1,32972002  | 0,00001 |
| ENSMUSG00000041319 | Thoc6    | -1,150470018 | 0,00001 |
| ENSMUSG00000035770 | Dync1li2 | -0,995360017 | 0,00001 |
| ENSMUSG00000017781 | Pitpna   | -0,97961998  | 0,00001 |
| ENSMUSG00000018372 | Cep95    | -0,870369971 | 0,00001 |
| ENSMUSG00000015176 | Nolc1    | -0,868929982 | 0,00001 |
| ENSMUSG00000021540 | Smad5    | -0,867739975 | 0,00001 |
| ENSMUSG00000007411 | Mark3    | -0,793640018 | 0,00001 |
| ENSMUSG00000020923 | Ubtf     | -0,545729995 | 0,00001 |
| ENSMUSG00000030082 | Sec61a1  | 0,684440017  | 0,00001 |
| ENSMUSG00000037370 | Enpp1    | 0,888300002  | 0,00001 |
| ENSMUSG00000025702 | March8   | 0,989369988  | 0,00001 |
| ENSMUSG00000028992 | Nmnat1   | 1,018550038  | 0,00001 |
| ENSMUSG00000021286 | Zfyve21  | 1,083209991  | 0,00001 |
| ENSMUSG00000050312 | Nsun3    | 1,235319972  | 0,00001 |
| ENSMUSG00000024507 | Hsd17b4  | 1,273100019  | 0,00001 |
| ENSMUSG00000028565 | Nfia     | 1,300029993  | 0,00001 |
| ENSMUSG00000031641 | Cbr4     | 1,326009989  | 0,00001 |
| ENSMUSG00000029455 | Aldh2    | 1,340600014  | 0,00001 |
| ENSMUSG00000032609 | Klhdc8b  | 1,377210021  | 0,00001 |
| ENSMUSG00000027984 | Hadh     | 1,413730025  | 0,00001 |
| ENSMUSG00000003762 | Coq8b    | 1,446589947  | 0,00001 |
| ENSMUSG00000034245 | Hdac11   | 1,492449999  | 0,00001 |
| ENSMUSG00000032359 | Ctsh     | 1,507380009  | 0,00001 |
| ENSMUSG00000039763 | Dnajc28  | 1,54697001   | 0,00001 |
| ENSMUSG00000039246 | Lyp1a1   | 1,602730036  | 0,00001 |
| ENSMUSG00000000326 | Comt     | 1,692880034  | 0,00001 |
| ENSMUSG00000042289 | Hsd3b7   | 1,772310019  | 0,00001 |
| ENSMUSG00000045316 | Fahd1    | 1,874940038  | 0,00001 |
| ENSMUSG00000090150 | Acad11   | 1,88259995   | 0,00001 |
| ENSMUSG00000002108 | Nr1h3    | 1,972740054  | 0,00001 |



|                    |          |              |         |
|--------------------|----------|--------------|---------|
| ENSMUSG00000024430 | Cabyr    | 2,015589952  | 0,00001 |
| ENSMUSG00000032380 | Dapk2    | 2,047610044  | 0,00001 |
| ENSMUSG00000030747 | Dgat2    | 2,104120016  | 0,00001 |
| ENSMUSG00000038527 | C1rl     | 2,230149984  | 0,00001 |
| ENSMUSG00000031980 | Agt      | 2,389849901  | 0,00001 |
| ENSMUSG00000001155 | Ftcd     | 2,490089893  | 0,00001 |
| ENSMUSG00000034456 | Uroc1    | 2,620460033  | 0,00001 |
| ENSMUSG00000042010 | Acacb    | 2,639529943  | 0,00001 |
| ENSMUSG00000025197 | Cyp2c23  | 2,812550068  | 0,00001 |
| ENSMUSG00000021364 | Elovl2   | 2,881079912  | 0,00001 |
| ENSMUSG00000060807 | Serpina6 | 3,279190063  | 0,00001 |
| ENSMUSG00000054034 | Tceal5   | 3,740740061  | 0,00001 |
| ENSMUSG00000090175 | Ugt1a9   | 4,080619812  | 0,00001 |
| ENSMUSG00000040583 | Cyp2b13  | 5,558650017  | 0,00001 |
| ENSMUSG00000048387 | Osr1     | -8,240690231 | 0,00001 |
| ENSMUSG00000030518 | Fam189a1 | -6,129799843 | 0,00001 |
| ENSMUSG00000006221 | Hspb7    | -5,529190063 | 0,00001 |
| ENSMUSG00000027661 | Slc2a10  | -5,053639889 | 0,00001 |
| ENSMUSG00000046694 | Tent5b   | -4,663000107 | 0,00001 |
| ENSMUSG00000071656 | Lrrn4cl  | -4,333380222 | 0,00001 |
| ENSMUSG00000041592 | Sdk2     | -3,931169987 | 0,00001 |
| ENSMUSG00000019890 | Nts      | -3,722090006 | 0,00001 |
| ENSMUSG00000049556 | Lingo1   | -3,715579987 | 0,00001 |
| ENSMUSG00000007039 | Ddah2    | -2,497060061 | 0,00001 |
| ENSMUSG00000035640 | Cbarp    | -1,879119992 | 0,00001 |
| ENSMUSG00000022994 | Adcy6    | -1,561849952 | 0,00001 |
| ENSMUSG00000018199 | Trove2   | -1,515939951 | 0,00001 |
| ENSMUSG00000047810 | Ccdc88b  | -1,480589986 | 0,00001 |
| ENSMUSG00000031107 | Rbmx2    | -1,467980027 | 0,00001 |
| ENSMUSG00000062115 | Rai1     | -1,323619962 | 0,00001 |
| ENSMUSG00000031939 | Taf1d    | -1,175359964 | 0,00001 |
| ENSMUSG00000022159 | Rab2b    | -1,167969942 | 0,00001 |
| ENSMUSG00000005481 | Ddx39    | -1,121299982 | 0,00001 |
| ENSMUSG00000020400 | Tnip1    | -1,021929979 | 0,00001 |
| ENSMUSG00000021910 | Nisch    | -1,018730044 | 0,00001 |
| ENSMUSG00000024772 | Ehd1     | -0,942070007 | 0,00001 |
| ENSMUSG00000020739 | Nup85    | -0,870419979 | 0,00001 |
| ENSMUSG00000024942 | Capn1    | -0,74217999  | 0,00001 |
| ENSMUSG00000015291 | Gdi1     | -0,741349995 | 0,00001 |
| ENSMUSG00000003166 | Dgcr2    | 0,587490022  | 0,00001 |
| ENSMUSG00000055991 | Zkscan5  | 0,679220021  | 0,00001 |
| ENSMUSG00000024645 | Timm21   | 0,705389977  | 0,00001 |
| ENSMUSG00000020664 | Dld      | 0,731750011  | 0,00001 |
| ENSMUSG00000023938 | Aars2    | 0,740750015  | 0,00001 |
| ENSMUSG00000032328 | Tmem30a  | 0,758880019  | 0,00001 |
| ENSMUSG00000020128 | Vps54    | 0,817569971  | 0,00001 |
| ENSMUSG00000038160 | Atg5     | 0,834039986  | 0,00001 |

|                    |         |              |         |
|--------------------|---------|--------------|---------|
| ENSMUSG00000016534 | Lamp2   | 0,858039975  | 0,00001 |
| ENSMUSG00000021044 | Adck1   | 0,872060001  | 0,00001 |
| ENSMUSG00000038312 | Edem2   | 0,957949996  | 0,00001 |
| ENSMUSG00000003746 | Man1a   | 1,017590046  | 0,00001 |
| ENSMUSG00000022827 | Rabl3   | 1,022950053  | 0,00001 |
| ENSMUSG00000015016 | Acsf3   | 1,145789981  | 0,00001 |
| ENSMUSG00000059447 | Hadhb   | 1,215530038  | 0,00001 |
| ENSMUSG00000025076 | Casp7   | 1,366549969  | 0,00001 |
| ENSMUSG00000056665 | Them6   | 1,568869948  | 0,00001 |
| ENSMUSG00000030064 | Frmd4b  | 1,728320003  | 0,00001 |
| ENSMUSG00000034006 | Pqlc1   | 1,730540037  | 0,00001 |
| ENSMUSG00000020321 | Mdh1    | 1,73774004   | 0,00001 |
| ENSMUSG00000024981 | Acsl5   | 1,766829967  | 0,00001 |
| ENSMUSG00000024070 | Prkd3   | 1,844509959  | 0,00001 |
| ENSMUSG00000019944 | Rhobtb1 | 1,942630053  | 0,00001 |
| ENSMUSG00000074071 | Fam169b | 2,070169926  | 0,00001 |
| ENSMUSG00000022546 | Gpt     | 2,225769997  | 0,00001 |
| ENSMUSG00000031196 | F8      | 2,242460012  | 0,00001 |
| ENSMUSG00000028185 | Dnase2b | 2,245690107  | 0,00001 |
| ENSMUSG00000004748 | Mtfp1   | 2,405989885  | 0,00001 |
| ENSMUSG00000026664 | Phyh    | 2,414619923  | 0,00001 |
| ENSMUSG00000054932 | Afp     | 2,499010086  | 0,00001 |
| ENSMUSG00000021702 | Thbs4   | -7,22424984  | 0,00001 |
| ENSMUSG00000038486 | Sv2a    | -5,39233017  | 0,00001 |
| ENSMUSG00000069763 | Tmem100 | -4,940100193 | 0,00001 |
| ENSMUSG00000042097 | Zfp239  | -4,550839901 | 0,00001 |
| ENSMUSG00000026175 | Vil1    | -4,27105999  | 0,00001 |
| ENSMUSG00000030041 | M1ap    | -3,099849939 | 0,00001 |
| ENSMUSG00000047766 | Lrrc49  | -3,051609993 | 0,00001 |
| ENSMUSG00000000901 | Mmp11   | -2,934930086 | 0,00001 |
| ENSMUSG00000035863 | Palm    | -2,544709921 | 0,00001 |
| ENSMUSG00000032060 | Cryab   | -2,527909994 | 0,00001 |
| ENSMUSG00000022623 | Shank3  | -2,188549995 | 0,00001 |
| ENSMUSG00000037594 | Clba1   | -2,17069006  | 0,00001 |
| ENSMUSG00000048279 | Sacs    | -2,165790081 | 0,00001 |
| ENSMUSG00000049225 | Pdp1    | -1,855819941 | 0,00001 |
| ENSMUSG00000055707 | Klhl26  | -1,790420055 | 0,00001 |
| ENSMUSG00000017667 | Zfp334  | -1,76602006  | 0,00001 |
| ENSMUSG00000028931 | Kcnab2  | -1,63744998  | 0,00001 |
| ENSMUSG00000022377 | Asap1   | -1,609609962 | 0,00001 |
| ENSMUSG00000028633 | Ctps    | -1,580579996 | 0,00001 |
| ENSMUSG00000033530 | Ttc7b   | -1,518079996 | 0,00001 |
| ENSMUSG00000034330 | Plcg2   | -1,383980036 | 0,00001 |
| ENSMUSG00000031585 | Gtf2e2  | -1,322829962 | 0,00001 |
| ENSMUSG00000024754 | Cemip2  | -1,310340047 | 0,00001 |
| ENSMUSG00000038872 | Zfhx3   | -1,28599     | 0,00001 |
| ENSMUSG00000051329 | Nup160  | -1,284469962 | 0,00001 |

|                    |           |              |         |
|--------------------|-----------|--------------|---------|
| ENSMUSG00000035851 | Ythdc1    | -1,193040013 | 0,00001 |
| ENSMUSG00000056962 | Jmjd6     | -1,151929975 | 0,00001 |
| ENSMUSG00000038437 | Mllt6     | -1,092560053 | 0,00001 |
| ENSMUSG00000079036 | Alkbh1    | -1,082180023 | 0,00001 |
| ENSMUSG00000053950 | Adnp2     | -1,018599987 | 0,00001 |
| ENSMUSG00000027394 | Ttl       | -0,935329974 | 0,00001 |
| ENSMUSG00000031691 | Tnp02     | -0,909919977 | 0,00001 |
| ENSMUSG00000025034 | Trim8     | -0,883300006 | 0,00001 |
| ENSMUSG00000027968 | Larp7     | -0,744300008 | 0,00001 |
| ENSMUSG00000024831 | Ighmbp2   | -0,670199999 | 0,00001 |
| ENSMUSG00000018921 | Pelp1     | -0,573960006 | 0,00001 |
| ENSMUSG00000040842 | Szrd1     | 0,419149995  | 0,00001 |
| ENSMUSG00000032869 | Psmf1     | 0,570959985  | 0,00001 |
| ENSMUSG00000046947 | Adck2     | 0,669529974  | 0,00001 |
| ENSMUSG00000051403 | Ppp1r37   | 0,825420022  | 0,00001 |
| ENSMUSG00000021785 | Ngly1     | 0,898459971  | 0,00001 |
| ENSMUSG00000038388 | Mpp6      | 0,906560004  | 0,00001 |
| ENSMUSG00000021993 | Mipep     | 1,12906003   | 0,00001 |
| ENSMUSG00000022514 | Il1rap    | 1,615170002  | 0,00001 |
| ENSMUSG00000039652 | Cpeb3     | 1,667529941  | 0,00001 |
| ENSMUSG00000053329 | D10Jhu81e | 1,683390021  | 0,00001 |
| ENSMUSG00000048772 | Tmem53    | 1,791000009  | 0,00001 |
| ENSMUSG00000015966 | Il17rb    | 1,903040051  | 0,00001 |
| ENSMUSG00000068587 | Mgam      | 1,966480017  | 0,00001 |
| ENSMUSG00000035000 | Dpp4      | 2,025880098  | 0,00001 |
| ENSMUSG00000040855 | Reps2     | 2,114099979  | 0,00001 |
| ENSMUSG00000059434 | Gckr      | 2,344680071  | 0,00001 |
| ENSMUSG00000051041 | Olfml1    | 2,407919884  | 0,00001 |
| ENSMUSG00000030244 | Gys2      | 2,733180046  | 0,00001 |
| ENSMUSG00000022025 | Cnmd      | 3,238240004  | 0,00001 |
| ENSMUSG00000045573 | Penk      | -5,165890217 | 0,00001 |
| ENSMUSG00000047910 | Pcdhb16   | -4,607930183 | 0,00001 |
| ENSMUSG00000026068 | Il18rap   | -3,335809946 | 0,00001 |
| ENSMUSG00000064264 | Zfp428    | -2,587990046 | 0,00001 |
| ENSMUSG00000056888 | Glipr1    | -2,448719978 | 0,00001 |
| ENSMUSG00000027356 | Fermt1    | -2,206899881 | 0,00001 |
| ENSMUSG00000041859 | Mcm3      | -1,377020001 | 0,00001 |
| ENSMUSG00000019433 | Gipc1     | -1,347339988 | 0,00001 |
| ENSMUSG00000022442 | Ttll1     | -1,343539953 | 0,00001 |
| ENSMUSG00000027660 | Skil      | -1,310600042 | 0,00001 |
| ENSMUSG00000021428 | Riok1     | -1,038519979 | 0,00001 |
| ENSMUSG00000017376 | Nlk       | -0,948939979 | 0,00001 |
| ENSMUSG00000024603 | Dctn4     | -0,824109972 | 0,00001 |
| ENSMUSG00000022558 | Mroh1     | -0,802850008 | 0,00001 |
| ENSMUSG00000038302 | Afg1l     | 0,754310012  | 0,00001 |
| ENSMUSG00000031671 | Setd6     | 0,881049991  | 0,00001 |
| ENSMUSG00000033720 | Sfxn5     | 0,99138999   | 0,00001 |

|                    |         |              |         |
|--------------------|---------|--------------|---------|
| ENSMUSG00000026781 | Acbd5   | 1,467839956  | 0,00001 |
| ENSMUSG00000010663 | Fads1   | 1,841330051  | 0,00001 |
| ENSMUSG00000028150 | Rorc    | 2,138659954  | 0,00001 |
| ENSMUSG00000047797 | Gjb1    | 2,392110109  | 0,00001 |
| ENSMUSG00000057346 | Apol9a  | 2,554749966  | 0,00001 |
| ENSMUSG00000020159 | Gabrp   | -5,964240074 | 0,00002 |
| ENSMUSG00000035352 | Ccl12   | -4,207300186 | 0,00002 |
| ENSMUSG00000031595 | Pdgfrl  | -3,418149948 | 0,00002 |
| ENSMUSG00000038256 | Bcl9    | -1,849020004 | 0,00002 |
| ENSMUSG00000022475 | Hdac7   | -1,296499968 | 0,00002 |
| ENSMUSG00000027680 | Fxr1    | -0,72487998  | 0,00002 |
| ENSMUSG00000029518 | Rab35   | -0,691429973 | 0,00002 |
| ENSMUSG00000031399 | Fam3a   | 0,614859998  | 0,00002 |
| ENSMUSG00000025825 | Iscu    | 1,264520049  | 0,00002 |
| ENSMUSG00000028756 | Pink1   | 1,353449941  | 0,00002 |
| ENSMUSG00000021868 | Ppif    | 1,412719965  | 0,00002 |
| ENSMUSG00000023921 | Mut     | 1,672600031  | 0,00002 |
| ENSMUSG00000004633 | Chn2    | 1,73100996   | 0,00002 |
| ENSMUSG00000074639 | Rdh16f2 | 2,857180119  | 0,00002 |
| ENSMUSG00000053030 | Spink2  | -8,696669579 | 0,00002 |
| ENSMUSG00000021047 | Nova1   | -7,937759876 | 0,00002 |
| ENSMUSG00000028487 | Bnc2    | -7,530789852 | 0,00002 |
| ENSMUSG00000034551 | Hdx     | -4,222469807 | 0,00002 |
| ENSMUSG00000040594 | Ranbp17 | -3,922990084 | 0,00002 |
| ENSMUSG00000038732 | Mboat1  | -3,204969883 | 0,00002 |
| ENSMUSG00000047330 | Kcne4   | -2,86439991  | 0,00002 |
| ENSMUSG00000027955 | Fam198b | -2,640969992 | 0,00002 |
| ENSMUSG00000057098 | Ebf1    | -2,584429979 | 0,00002 |
| ENSMUSG00000028111 | Ctsk    | -2,439429998 | 0,00002 |
| ENSMUSG00000065226 | Gm25791 | -2,349129915 | 0,00002 |
| ENSMUSG00000047712 | Ust     | -2,340830088 | 0,00002 |
| ENSMUSG00000051335 | Gfod1   | -2,338279963 | 0,00002 |
| ENSMUSG00000049130 | C5ar1   | -2,254839897 | 0,00002 |
| ENSMUSG00000024660 | Incenp  | -1,747650027 | 0,00002 |
| ENSMUSG00000092730 | Snora24 | -1,631389976 | 0,00002 |
| ENSMUSG00000096472 | Cdkn2d  | -1,553239942 | 0,00002 |
| ENSMUSG00000011158 | Brf1    | -0,827970028 | 0,00002 |
| ENSMUSG00000003808 | Farsa   | -0,779190004 | 0,00002 |
| ENSMUSG00000040006 | Ginm1   | 0,927150011  | 0,00002 |
| ENSMUSG00000031245 | Hmgn5   | 1,004299998  | 0,00002 |
| ENSMUSG00000037706 | Cd81    | 1,033290029  | 0,00002 |
| ENSMUSG00000008348 | Ubc     | 1,185760021  | 0,00002 |
| ENSMUSG00000042903 | Foxo4   | 1,190969944  | 0,00002 |
| ENSMUSG00000062908 | Acadm   | 1,385239959  | 0,00002 |
| ENSMUSG00000029173 | Sepsecs | 1,502519965  | 0,00002 |
| ENSMUSG00000035936 | Aldh5a1 | 1,594470024  | 0,00002 |
| ENSMUSG00000022742 | Cpox    | 1,625609994  | 0,00002 |

|                    |               |              |         |
|--------------------|---------------|--------------|---------|
| ENSMUSG00000028479 | Gne           | 1,713150024  | 0,00002 |
| ENSMUSG00000034177 | Rnf43         | 1,728180051  | 0,00002 |
| ENSMUSG00000049115 | Agtr1a        | 2,04479003   | 0,00002 |
| ENSMUSG00000039628 | Hs3st6        | 2,128350019  | 0,00002 |
| ENSMUSG00000031883 | Car7          | 2,345849991  | 0,00002 |
| ENSMUSG00000051652 | Lrrc3         | 2,37293005   | 0,00002 |
| ENSMUSG00000058656 | Samd12        | -5,88888979  | 0,00002 |
| ENSMUSG00000022686 | B3gnt5        | -3,362499952 | 0,00002 |
| ENSMUSG00000059974 | Ntm           | -3,105890036 | 0,00002 |
| ENSMUSG00000049775 | Tmsb4x        | -2,686049938 | 0,00002 |
| ENSMUSG00000022199 | Slc22a17      | -2,461009979 | 0,00002 |
| ENSMUSG00000025001 | Hells         | -2,415940046 | 0,00002 |
| ENSMUSG00000001228 | Uhrf1         | -2,374000072 | 0,00002 |
| ENSMUSG00000024664 | Fads3         | -2,097860098 | 0,00002 |
| ENSMUSG00000003992 | Ssbp2         | -1,987759948 | 0,00002 |
| ENSMUSG00000026972 | Arrdc1        | -1,846480012 | 0,00002 |
| ENSMUSG00000094910 | D430019H16Rik | -1,691570044 | 0,00002 |
| ENSMUSG00000030499 | Kctd15        | -1,677780032 | 0,00002 |
| ENSMUSG00000026496 | Parp1         | -1,322630048 | 0,00002 |
| ENSMUSG00000030471 | Zdhhc13       | -1,316020012 | 0,00002 |
| ENSMUSG00000033166 | Dis3          | -1,202550054 | 0,00002 |
| ENSMUSG00000071652 | Ints5         | -0,843509972 | 0,00002 |
| ENSMUSG00000054405 | Dnajc8        | -0,746010005 | 0,00002 |
| ENSMUSG00000007815 | Rhoa          | -0,642159998 | 0,00002 |
| ENSMUSG00000028164 | Manba         | -0,608959973 | 0,00002 |
| ENSMUSG00000001445 | Mrpl10        | 0,539279997  | 0,00002 |
| ENSMUSG00000040746 | Rnf167        | 0,576489985  | 0,00002 |
| ENSMUSG00000028550 | Atg4c         | 0,803839982  | 0,00002 |
| ENSMUSG00000031402 | Mpp1          | 0,988439977  | 0,00002 |
| ENSMUSG00000027180 | Fbxo3         | 0,997380018  | 0,00002 |
| ENSMUSG00000013997 | Nit1          | 1,295330048  | 0,00002 |
| ENSMUSG00000028085 | Gatb          | 1,30606997   | 0,00002 |
| ENSMUSG00000049858 | Suox          | 1,454409957  | 0,00002 |
| ENSMUSG00000053460 | Ggcx          | 1,606789947  | 0,00002 |
| ENSMUSG00000020644 | Id2           | 1,676399946  | 0,00002 |
| ENSMUSG00000053886 | Sh2d4a        | 1,813500047  | 0,00002 |
| ENSMUSG00000004035 | Gstm7         | 2,096260071  | 0,00002 |
| ENSMUSG00000030237 | Slco1a4       | 2,455319881  | 0,00002 |
| ENSMUSG00000039323 | Igfbp2        | 2,877360106  | 0,00002 |
| ENSMUSG00000030364 | Clec2h        | 3,999279976  | 0,00002 |
| ENSMUSG00000072244 | Trim6         | -2,530440092 | 0,00002 |
| ENSMUSG00000042784 | Muc1          | -2,48390007  | 0,00002 |
| ENSMUSG00000032717 | Mdfi          | -2,41753006  | 0,00002 |
| ENSMUSG00000036390 | Gadd45a       | -2,038460016 | 0,00002 |
| ENSMUSG00000031728 | Zfp821        | -1,595309973 | 0,00002 |
| ENSMUSG00000040747 | Cd53          | -1,573510051 | 0,00002 |
| ENSMUSG00000071337 | Tia1          | -1,55151999  | 0,00002 |

|                    |          |              |         |
|--------------------|----------|--------------|---------|
| ENSMUSG00000029106 | Add1     | -1,013139963 | 0,00002 |
| ENSMUSG00000001175 | Calm1    | -0,762049973 | 0,00002 |
| ENSMUSG00000031447 | Lamp1    | 0,605440021  | 0,00002 |
| ENSMUSG00000032583 | Mon1a    | 0,77601999   | 0,00002 |
| ENSMUSG00000033126 | Ybey     | 1,005800009  | 0,00002 |
| ENSMUSG00000073609 | D2hgdh   | 1,130820036  | 0,00002 |
| ENSMUSG00000024247 | Pkdcc    | 1,418830037  | 0,00002 |
| ENSMUSG00000020733 | Slc9a3r1 | 1,429829955  | 0,00002 |
| ENSMUSG00000030739 | Myh14    | 1,606050014  | 0,00002 |
| ENSMUSG00000029136 | Rbks     | 1,837129951  | 0,00002 |
| ENSMUSG00000049152 | Ugt3a2   | 2,319380045  | 0,00002 |
| ENSMUSG00000031844 | Hsd17b2  | 2,325649977  | 0,00002 |
| ENSMUSG00000031877 | Ces2g    | 2,380810022  | 0,00002 |
| ENSMUSG00000026787 | Gad2     | -9,668499947 | 0,00002 |
| ENSMUSG00000029576 | Radil    | -5,730750084 | 0,00002 |
| ENSMUSG00000041193 | Pla2g5   | -5,033360004 | 0,00002 |
| ENSMUSG00000060093 | Hist1h4a | -4,421000004 | 0,00002 |
| ENSMUSG00000033491 | Prss35   | -3,510519981 | 0,00002 |
| ENSMUSG00000022099 | Dmtn     | -2,590039968 | 0,00002 |
| ENSMUSG00000034906 | Ncaph    | -1,915660024 | 0,00002 |
| ENSMUSG00000000489 | Pdgfb    | -1,811550021 | 0,00002 |
| ENSMUSG00000028873 | Cdca8    | -1,807389975 | 0,00002 |
| ENSMUSG00000047434 | Xxylt1   | -1,769889951 | 0,00002 |
| ENSMUSG00000039081 | Zfp503   | -1,768919945 | 0,00002 |
| ENSMUSG00000057406 | Nsd2     | -1,432629943 | 0,00002 |
| ENSMUSG00000020184 | Mdm2     | -1,173879981 | 0,00002 |
| ENSMUSG00000046441 | Cmtr2    | -1,055529952 | 0,00002 |
| ENSMUSG00000020211 | Sf3a2    | -0,969860017 | 0,00002 |
| ENSMUSG00000038497 | Tmco3    | -0,908460021 | 0,00002 |
| ENSMUSG00000027433 | Xrn2     | -0,873260021 | 0,00002 |
| ENSMUSG00000032590 | Apeh     | 0,738460004  | 0,00002 |
| ENSMUSG00000004798 | Ulk2     | 0,934589982  | 0,00002 |
| ENSMUSG00000041957 | Pkp2     | 1,04350996   | 0,00002 |
| ENSMUSG00000073838 | Tufm     | 1,063509941  | 0,00002 |
| ENSMUSG00000035759 | Bbs10    | 1,103440046  | 0,00002 |
| ENSMUSG00000024818 | Slc25a45 | 1,128260016  | 0,00002 |
| ENSMUSG00000032064 | Dixdc1   | 1,233150005  | 0,00002 |
| ENSMUSG00000066442 | Mthfs    | 1,275329947  | 0,00002 |
| ENSMUSG00000030275 | Etnk1    | 1,319169998  | 0,00002 |
| ENSMUSG00000028527 | Ak4      | 1,321539998  | 0,00002 |
| ENSMUSG00000040820 | Hlcs     | 1,532799959  | 0,00002 |
| ENSMUSG00000032092 | Mpzi2    | 1,567620039  | 0,00002 |
| ENSMUSG00000021794 | Glud1    | 1,671120048  | 0,00002 |
| ENSMUSG00000022847 | Thpo     | 1,790400028  | 0,00002 |
| ENSMUSG00000045636 | Mtus1    | 1,799649954  | 0,00002 |
| ENSMUSG00000030670 | Cyp2r1   | 1,889610052  | 0,00002 |
| ENSMUSG00000024899 | Papss2   | 2,081520081  | 0,00002 |

|                    |         |              |         |
|--------------------|---------|--------------|---------|
| ENSMUSG00000031443 | F7      | 2,131649971  | 0,00002 |
| ENSMUSG00000023963 | Cyp39a1 | 2,306809902  | 0,00002 |
| ENSMUSG00000027227 | Sord    | 2,350090027  | 0,00002 |
| ENSMUSG00000000049 | ApoH    | 2,558559895  | 0,00002 |
| ENSMUSG00000062410 | Hsd3b3  | 2,65060997   | 0,00002 |
| ENSMUSG00000026295 | Spp2    | 2,661870003  | 0,00002 |
| ENSMUSG00000028051 | Hcn3    | 2,81836009   | 0,00002 |
| ENSMUSG00000056679 | Gpr173  | -5,655529976 | 0,00002 |
| ENSMUSG00000028463 | Car9    | -3,716660023 | 0,00002 |
| ENSMUSG00000057092 | Fxyd3   | -3,505929947 | 0,00002 |
| ENSMUSG0000001020  | S100a4  | -3,254159927 | 0,00002 |
| ENSMUSG00000069920 | B3gnt9  | -3,078000069 | 0,00002 |
| ENSMUSG00000024855 | Pacs1   | -2,479020119 | 0,00002 |
| ENSMUSG00000045328 | Cenpe   | -2,473170042 | 0,00002 |
| ENSMUSG00000022661 | Cd200   | -2,196160078 | 0,00002 |
| ENSMUSG00000025140 | Pycr1   | -2,152050018 | 0,00002 |
| ENSMUSG00000040389 | Wdr47   | -1,963379979 | 0,00002 |
| ENSMUSG00000036718 | Micall2 | -1,819390059 | 0,00002 |
| ENSMUSG00000015143 | Actn1   | -1,797309995 | 0,00002 |
| ENSMUSG00000073987 | Ggh     | -1,791560054 | 0,00002 |
| ENSMUSG00000050379 | Sept6   | -1,560670018 | 0,00002 |
| ENSMUSG00000032939 | Nup93   | -1,058159947 | 0,00002 |
| ENSMUSG00000040652 | Oaz2    | -0,929939985 | 0,00002 |
| ENSMUSG00000038544 | Inip    | -0,900439978 | 0,00002 |
| ENSMUSG00000029267 | Mtf2    | -0,84641999  | 0,00002 |
| ENSMUSG00000000776 | Polr3d  | -0,738179982 | 0,00002 |
| ENSMUSG00000021116 | Eif2s1  | -0,737190008 | 0,00002 |
| ENSMUSG00000033285 | Wdr3    | -0,608340025 | 0,00002 |
| ENSMUSG00000027575 | Arfgap1 | -0,578170002 | 0,00002 |
| ENSMUSG00000061244 | Exoc5   | -0,49368     | 0,00002 |
| ENSMUSG0000003099  | Ppp5c   | 0,495759994  | 0,00002 |
| ENSMUSG00000047694 | Yipf6   | 0,759019971  | 0,00002 |
| ENSMUSG00000036552 | Ermard  | 0,881280005  | 0,00002 |
| ENSMUSG00000001482 | Def8    | 0,888750017  | 0,00002 |
| ENSMUSG00000025453 | Nnt     | 1,173900008  | 0,00002 |
| ENSMUSG00000033684 | Qsox1   | 1,217880011  | 0,00002 |
| ENSMUSG00000016319 | Slc25a5 | 1,274600029  | 0,00002 |
| ENSMUSG00000022885 | St6gal1 | 1,361580014  | 0,00002 |
| ENSMUSG00000039062 | Anpep   | 1,369400024  | 0,00002 |
| ENSMUSG00000022214 | Dcaf11  | 1,539530039  | 0,00002 |
| ENSMUSG00000050323 | Ndufaf6 | 1,668230057  | 0,00002 |
| ENSMUSG00000036880 | Acaa2   | 1,847460032  | 0,00002 |
| ENSMUSG00000035112 | Wnk4    | 2,001379967  | 0,00002 |
| ENSMUSG00000032204 | Aqp9    | 2,068429947  | 0,00002 |
| ENSMUSG00000017453 | Pipox   | 2,352570057  | 0,00002 |
| ENSMUSG00000041794 | Myrip   | 4,219649792  | 0,00002 |
| ENSMUSG00000034164 | Emid1   | -3,680809975 | 0,00003 |



|                     |           |              |         |
|---------------------|-----------|--------------|---------|
| ENSMUSG00000013415  | Igf2bp1   | -10,69085979 | 0,00003 |
| ENSMUSG000000096140 | Ankrd66   | -7,353079796 | 0,00003 |
| ENSMUSG00000026387  | Sctr      | -5,070859909 | 0,00003 |
| ENSMUSG000000053475 | Tnfaip6   | -4,323770046 | 0,00003 |
| ENSMUSG00000016458  | Wt1       | -4,102220058 | 0,00003 |
| ENSMUSG000000070526 | Peg12     | -3,706099987 | 0,00003 |
| ENSMUSG00000022494  | Shisa9    | -3,652220011 | 0,00003 |
| ENSMUSG000000042116 | Vwa1      | -2,763220072 | 0,00003 |
| ENSMUSG00000027469  | Tpx2      | -2,450099945 | 0,00003 |
| ENSMUSG00000027555  | Car13     | -2,329169989 | 0,00003 |
| ENSMUSG00000019539  | Rcn3      | -2,1057899   | 0,00003 |
| ENSMUSG000000042099 | Kank3     | -1,234459996 | 0,00003 |
| ENSMUSG00000025666  | Tmem47    | -1,216519952 | 0,00003 |
| ENSMUSG00000034889  | Cactin    | -0,954479992 | 0,00003 |
| ENSMUSG00000004677  | Myo9b     | -0,886150002 | 0,00003 |
| ENSMUSG00000024515  | Smad4     | -0,815930009 | 0,00003 |
| ENSMUSG00000028790  | Khdrbs1   | -0,746959984 | 0,00003 |
| ENSMUSG00000029017  | Pmpcb     | 1,048149943  | 0,00003 |
| ENSMUSG00000066441  | Rdh11     | 1,396860003  | 0,00003 |
| ENSMUSG000000040964 | Arhgef10l | 1,47428      | 0,00003 |
| ENSMUSG00000055027  | Smyd1     | 1,621549964  | 0,00003 |
| ENSMUSG000000048368 | Omd       | 1,701769948  | 0,00003 |
| ENSMUSG00000071711  | Mpst      | 1,830189943  | 0,00003 |
| ENSMUSG00000037710  | Cisd1     | 2,029769897  | 0,00003 |
| ENSMUSG00000002032  | Tmem25    | 2,343369961  | 0,00003 |
| ENSMUSG00000054385  | Ceacam2   | 2,573970079  | 0,00003 |
| ENSMUSG00000032773  | Chrm1     | 3,687289953  | 0,00003 |
| ENSMUSG000000040420 | Cdh18     | 3,948060036  | 0,00003 |
| ENSMUSG00000034648  | Lrrn1     | -5,317550182 | 0,00003 |
| ENSMUSG00000030428  | Ttyh1     | -2,932590008 | 0,00003 |
| ENSMUSG00000079560  | Hoxa3     | -2,641940117 | 0,00003 |
| ENSMUSG00000052105  | Mtcl1     | -2,43166995  | 0,00003 |
| ENSMUSG00000037217  | Syn1      | -2,343440056 | 0,00003 |
| ENSMUSG00000001120  | Pcbp3     | -2,222490072 | 0,00003 |
| ENSMUSG00000039199  | Zdhhc1    | -1,745110035 | 0,00003 |
| ENSMUSG00000020573  | Pik3cg    | -1,62480998  | 0,00003 |
| ENSMUSG00000039108  | Lsm14b    | -0,851849973 | 0,00003 |
| ENSMUSG00000019087  | Atp6ap1   | -0,812269986 | 0,00003 |
| ENSMUSG00000036693  | Nop14     | -0,683189988 | 0,00003 |
| ENSMUSG00000026192  | Atic      | -0,681299984 | 0,00003 |
| ENSMUSG00000079334  | Naa80     | 0,720489979  | 0,00003 |
| ENSMUSG00000020130  | Tbc1d15   | 0,967419982  | 0,00003 |
| ENSMUSG00000028673  | Fuca1     | 1,18208003   | 0,00003 |
| ENSMUSG00000001467  | Cyp51     | 1,452309966  | 0,00003 |
| ENSMUSG00000001986  | Gria3     | 1,930549979  | 0,00003 |
| ENSMUSG00000038521  | C1s1      | 1,931210041  | 0,00003 |
| ENSMUSG00000055546  | Timd4     | 2,264090061  | 0,00003 |

|                    |               |              |         |
|--------------------|---------------|--------------|---------|
| ENSMUSG00000023057 | Fabp2         | 2,687969923  | 0,00003 |
| ENSMUSG00000041567 | Serpina12     | 3,081500053  | 0,00003 |
| ENSMUSG00000011751 | Sptbn4        | -5,585350037 | 0,00003 |
| ENSMUSG00000028246 | Faxc          | -5,338339806 | 0,00003 |
| ENSMUSG00000034161 | Scx           | -3,598700047 | 0,00003 |
| ENSMUSG00000037362 | Nov           | -3,48616004  | 0,00003 |
| ENSMUSG00000049670 | Morn4         | -3,239279985 | 0,00003 |
| ENSMUSG00000027624 | Epb41l1       | -2,322139978 | 0,00003 |
| ENSMUSG00000024349 | Tmem173       | -1,436290026 | 0,00003 |
| ENSMUSG00000032712 | Resf1         | -1,331050038 | 0,00003 |
| ENSMUSG00000034799 | Unc13a        | -1,298650026 | 0,00003 |
| ENSMUSG00000019920 | Lims1         | -0,887489974 | 0,00003 |
| ENSMUSG00000028990 | Lzic          | -0,743740022 | 0,00003 |
| ENSMUSG00000046707 | Csnk2a2       | -0,704289973 | 0,00003 |
| ENSMUSG00000031754 | Nudt21        | -0,642780006 | 0,00003 |
| ENSMUSG00000022503 | Nubp1         | 0,632619977  | 0,00003 |
| ENSMUSG00000029571 | Tmem106b      | 0,852689981  | 0,00003 |
| ENSMUSG00000026307 | Scly          | 1,37124002   | 0,00003 |
| ENSMUSG00000037542 | Aldh8a1       | 2,389290094  | 0,00003 |
| ENSMUSG00000025396 | Hsd17b6       | 2,788150072  | 0,00003 |
| ENSMUSG00000036027 | 1810046K07Rik | 4,2355299    | 0,00003 |
| ENSMUSG00000045027 | Prss22        | -8,418669701 | 0,00003 |
| ENSMUSG00000029838 | Ptn           | -5,023310184 | 0,00003 |
| ENSMUSG00000041078 | Grid1         | -3,784729958 | 0,00003 |
| ENSMUSG00000017897 | Eya2          | -3,220669985 | 0,00003 |
| ENSMUSG00000037995 | Igsf9         | -2,970989943 | 0,00003 |
| ENSMUSG00000080316 | Spaca6        | -2,145669937 | 0,00003 |
| ENSMUSG00000020901 | Pik3r5        | -1,806710005 | 0,00003 |
| ENSMUSG00000022610 | Mapk12        | -1,548560023 | 0,00003 |
| ENSMUSG00000004100 | Ppan          | -1,152690053 | 0,00003 |
| ENSMUSG00000024974 | Smc3          | -0,898299992 | 0,00003 |
| ENSMUSG00000029710 | Ephb4         | -0,861180007 | 0,00003 |
| ENSMUSG00000002803 | Btbd6         | 0,586380005  | 0,00003 |
| ENSMUSG00000056216 | Cebpg         | 0,846350014  | 0,00003 |
| ENSMUSG00000003184 | Irf3          | 0,902890027  | 0,00003 |
| ENSMUSG00000038880 | Mrps34        | 1,149960041  | 0,00003 |
| ENSMUSG00000048706 | Lurap1l       | 1,591539979  | 0,00003 |
| ENSMUSG00000028420 | Tmem38b       | 1,662070036  | 0,00003 |
| ENSMUSG00000026170 | Cyp27a1       | 1,896520019  | 0,00003 |
| ENSMUSG00000022766 | Serpind1      | 2,346410036  | 0,00003 |
| ENSMUSG00000054757 | Akr1c20       | 2,394380093  | 0,00003 |
| ENSMUSG00000038745 | Nlrp6         | 2,517240047  | 0,00003 |
| ENSMUSG00000072849 | Serpina1e     | 3,077519894  | 0,00003 |
| ENSMUSG00000025401 | Myo1a         | -5,423900127 | 0,00003 |
| ENSMUSG00000014158 | Trpv4         | -2,742199898 | 0,00003 |
| ENSMUSG00000019564 | Arid3a        | -2,359889984 | 0,00003 |
| ENSMUSG00000040220 | Gas8          | -1,571529984 | 0,00003 |

|                    |           |              |         |
|--------------------|-----------|--------------|---------|
| ENSMUSG00000071714 | Csf2rb2   | -1,387230039 | 0,00003 |
| ENSMUSG00000026305 | Lrrfip1   | -1,312899947 | 0,00003 |
| ENSMUSG00000090523 | Gypc      | -0,818379998 | 0,00003 |
| ENSMUSG00000020432 | Tcn2      | 0,47093001   | 0,00003 |
| ENSMUSG00000031828 | Klhl36    | 0,821699977  | 0,00003 |
| ENSMUSG00000028145 | Them4     | 1,137799978  | 0,00003 |
| ENSMUSG00000020919 | Stat5b    | 1,167600036  | 0,00003 |
| ENSMUSG00000022763 | Aifm3     | 1,888100028  | 0,00003 |
| ENSMUSG00000034258 | Flvcr2    | 1,989269972  | 0,00003 |
| ENSMUSG00000023828 | Slc22a3   | 2,047230005  | 0,00003 |
| ENSMUSG00000000154 | Slc22a18  | 2,385529995  | 0,00003 |
| ENSMUSG00000027559 | Car3      | 2,76970005   | 0,00003 |
| ENSMUSG00000033207 | Mamdc2    | -2,050800085 | 0,00004 |
| ENSMUSG00000020334 | Slc22a4   | -2,029690027 | 0,00004 |
| ENSMUSG00000002732 | Fkbp7     | -1,770069957 | 0,00004 |
| ENSMUSG00000031872 | Bean1     | -4,729320049 | 0,00004 |
| ENSMUSG00000028841 | Cnksr1    | -4,023910046 | 0,00004 |
| ENSMUSG00000028587 | Orc1      | -2,825500011 | 0,00004 |
| ENSMUSG00000042842 | Serpinb6b | -1,792000055 | 0,00004 |
| ENSMUSG00000045679 | Pqlc3     | -1,727370024 | 0,00004 |
| ENSMUSG00000020277 | Pfkl      | -1,684239984 | 0,00004 |
| ENSMUSG00000089774 | Slc5a3    | -1,461709976 | 0,00004 |
| ENSMUSG00000002844 | Adprh     | -1,451719999 | 0,00004 |
| ENSMUSG00000022791 | Tnk2      | -1,141109943 | 0,00004 |
| ENSMUSG00000021557 | Agtppb1   | -1,101959944 | 0,00004 |
| ENSMUSG00000027722 | Spata5    | -0,975189984 | 0,00004 |
| ENSMUSG00000014859 | E2f4      | -0,596660018 | 0,00004 |
| ENSMUSG00000057554 | Lgals8    | 1,173449993  | 0,00004 |
| ENSMUSG00000029664 | Tfpi2     | 1,758409977  | 0,00004 |
| ENSMUSG00000025498 | Irf7      | 1,759729981  | 0,00004 |
| ENSMUSG00000068246 | Apol9b    | 2,071229935  | 0,00004 |
| ENSMUSG00000022877 | Hrg       | 2,218219995  | 0,00004 |
| ENSMUSG00000035878 | Hykk      | 2,475110054  | 0,00004 |
| ENSMUSG00000032079 | Apoa5     | 2,501590014  | 0,00004 |
| ENSMUSG00000029656 | C8b       | 2,586849928  | 0,00004 |
| ENSMUSG00000024863 | Mbl2      | 2,777240038  | 0,00004 |
| ENSMUSG00000054191 | Klf1      | 2,971790075  | 0,00004 |
| ENSMUSG00000041406 | BC055324  | -2,084660053 | 0,00004 |
| ENSMUSG00000090698 | Apold1    | -1,867759943 | 0,00004 |
| ENSMUSG00000027330 | Cdc25b    | -1,68769002  | 0,00004 |
| ENSMUSG00000090100 | Ttbk2     | -1,557010055 | 0,00004 |
| ENSMUSG00000042115 | Klhdc8a   | -1,399260044 | 0,00004 |
| ENSMUSG00000025171 | Ubt1      | -1,196069956 | 0,00004 |
| ENSMUSG00000035621 | Midn      | -1,000499964 | 0,00004 |
| ENSMUSG00000028381 | Ugcg      | -0,866609991 | 0,00004 |
| ENSMUSG00000052593 | Adam17    | -0,729300022 | 0,00004 |
| ENSMUSG00000038332 | Sesn1     | 0,719269991  | 0,00004 |

|                     |               |              |         |
|---------------------|---------------|--------------|---------|
| ENSMUSG00000006021  | Kptn          | 0,934469998  | 0,00004 |
| ENSMUSG00000015247  | Nipsnap3b     | 1,112079978  | 0,00004 |
| ENSMUSG00000003528  | Slc25a1       | 1,216910005  | 0,00004 |
| ENSMUSG00000060224  | Pyroxd2       | 1,32585001   | 0,00004 |
| ENSMUSG00000005803  | Sqor          | 1,878360033  | 0,00004 |
| ENSMUSG000000035104 | Eva1a         | 1,888810039  | 0,00004 |
| ENSMUSG00000006567  | Atp7b         | 2,075020075  | 0,00004 |
| ENSMUSG000000033022 | Cdo1          | 2,082000017  | 0,00004 |
| ENSMUSG00000078607  | 1810010H24Rik | 2,480560064  | 0,00004 |
| ENSMUSG00000027977  | Ndst3         | -8,969550133 | 0,00004 |
| ENSMUSG00000032358  | Fam83b        | -6,58893013  | 0,00004 |
| ENSMUSG00000021904  | Sema3g        | -3,267800093 | 0,00004 |
| ENSMUSG00000020135  | Apc2          | -2,88319993  | 0,00004 |
| ENSMUSG00000034773  | BC030867      | -2,61135006  | 0,00004 |
| ENSMUSG00000048232  | Fbxo10        | -2,031130075 | 0,00004 |
| ENSMUSG00000022369  | Mtbp          | -1,746379972 | 0,00004 |
| ENSMUSG00000037960  | Card19        | -1,649000049 | 0,00004 |
| ENSMUSG000000031925 | Maml2         | -1,574970007 | 0,00004 |
| ENSMUSG000000051817 | Sox12         | -1,433089972 | 0,00004 |
| ENSMUSG00000049184  | Purg          | -1,358540058 | 0,00004 |
| ENSMUSG00000022614  | Lmf2          | -0,62519002  | 0,00004 |
| ENSMUSG00000002981  | Clptm1        | 0,417109996  | 0,00004 |
| ENSMUSG00000014748  | Tex261        | 0,656830013  | 0,00004 |
| ENSMUSG00000037720  | Tmem33        | 0,661849976  | 0,00004 |
| ENSMUSG00000021906  | Oxnad1        | 0,89538002   | 0,00004 |
| ENSMUSG00000002846  | Timmdc1       | 0,990419984  | 0,00004 |
| ENSMUSG00000032370  | Lactb         | 1,459169984  | 0,00004 |
| ENSMUSG00000028138  | Adh5          | 1,478809953  | 0,00004 |
| ENSMUSG00000018796  | Acsl1         | 2,266370058  | 0,00004 |
| ENSMUSG00000039109  | F13a1         | -3,816800117 | 0,00004 |
| ENSMUSG00000024727  | Trpm6         | -3,622920036 | 0,00004 |
| ENSMUSG00000074579  | Lekr1         | -3,229870081 | 0,00004 |
| ENSMUSG00000097487  | Ptges3l       | -3,042249918 | 0,00004 |
| ENSMUSG00000001403  | Ube2c         | -2,492180109 | 0,00004 |
| ENSMUSG000000050192 | Eif5a2        | -1,844599962 | 0,00004 |
| ENSMUSG00000004099  | Dnmt1         | -1,404500008 | 0,00004 |
| ENSMUSG00000079260  | Tmppe         | -1,09750998  | 0,00004 |
| ENSMUSG00000042197  | Zfp451        | -0,839349985 | 0,00004 |
| ENSMUSG00000028149  | Rap1gds1      | -0,773710012 | 0,00004 |
| ENSMUSG00000031533  | Mrps31        | 0,953289986  | 0,00004 |
| ENSMUSG00000021094  | Dhrs7         | 1,589560032  | 0,00004 |
| ENSMUSG000000055301 | Adh7          | 1,855180025  | 0,00004 |
| ENSMUSG00000041202  | Pla2g2d       | -6,268189907 | 0,00004 |
| ENSMUSG00000034813  | Grip1         | -2,296060085 | 0,00004 |
| ENSMUSG00000034748  | Sirt6         | -1,721179962 | 0,00004 |
| ENSMUSG00000036478  | Btg1          | -1,46333003  | 0,00004 |
| ENSMUSG00000021707  | Dhfr          | 1,248620033  | 0,00004 |

|                    |         |              |         |
|--------------------|---------|--------------|---------|
| ENSMUSG00000006373 | Pgrmc1  | 1,793400049  | 0,00004 |
| ENSMUSG00000020604 | Arsg    | 1,95549955   | 0,00004 |
| ENSMUSG00000033578 | Tmem35a | -3,458709955 | 0,00005 |
| ENSMUSG00000046058 | Eid2    | -2,70468998  | 0,00005 |
| ENSMUSG00000041199 | Rpusd1  | -1,136180043 | 0,00005 |
| ENSMUSG00000033545 | Znrf1   | -0,890910029 | 0,00005 |
| ENSMUSG00000041130 | Zfp598  | 0,644640028  | 0,00005 |
| ENSMUSG00000026626 | Ppp2r5a | 0,972670019  | 0,00005 |
| ENSMUSG00000031523 | Dlc1    | 1,663130045  | 0,00005 |
| ENSMUSG00000031963 | Bmper   | -3,627360106 | 0,00005 |
| ENSMUSG00000057751 | Megf6   | -2,095119953 | 0,00005 |
| ENSMUSG00000028678 | Kif2c   | -1,976549983 | 0,00005 |
| ENSMUSG00000030616 | Sytl2   | -1,938789964 | 0,00005 |
| ENSMUSG00000006585 | Cdt1    | -1,437430024 | 0,00005 |
| ENSMUSG00000022637 | Cblb    | -1,413779974 | 0,00005 |
| ENSMUSG00000024525 | Impa2   | -1,390939951 | 0,00005 |
| ENSMUSG00000031776 | Arl2bp  | -1,316779971 | 0,00005 |
| ENSMUSG00000027805 | Pfn2    | -1,211629987 | 0,00005 |
| ENSMUSG00000036989 | Trim3   | -1,210540056 | 0,00005 |
| ENSMUSG00000040552 | C3ar1   | -1,14756     | 0,00005 |
| ENSMUSG00000033075 | Senp1   | -1,015669942 | 0,00005 |
| ENSMUSG00000001440 | Kpnb1   | -0,96085     | 0,00005 |
| ENSMUSG00000039294 | Cybc1   | -0,896640003 | 0,00005 |
| ENSMUSG00000052997 | Uba2    | -0,73190999  | 0,00005 |
| ENSMUSG00000016477 | E2f3    | -0,668850005 | 0,00005 |
| ENSMUSG00000030435 | U2af2   | -0,465310007 | 0,00005 |
| ENSMUSG00000002847 | Pla1a   | 1,260470033  | 0,00005 |
| ENSMUSG00000016942 | Tmprss6 | 2,039510012  | 0,00005 |
| ENSMUSG00000030849 | Fgfr2   | 2,045259953  | 0,00005 |
| ENSMUSG00000033427 | Upb1    | 2,357929945  | 0,00005 |
| ENSMUSG00000027690 | Slc2a2  | 2,444999933  | 0,00005 |
| ENSMUSG00000015083 | C8g     | 2,627549887  | 0,00005 |
| ENSMUSG00000037466 | Tedc1   | -2,296159983 | 0,00005 |
| ENSMUSG00000015981 | Stk32c  | -2,167249918 | 0,00005 |
| ENSMUSG00000027386 | Fbln7   | -2,146440029 | 0,00005 |
| ENSMUSG00000038241 | Cep250  | -1,783169985 | 0,00005 |
| ENSMUSG00000040596 | Pogk    | -1,761319995 | 0,00005 |
| ENSMUSG00000033960 | Jcad    | -1,636669993 | 0,00005 |
| ENSMUSG00000027959 | Sass6   | -1,535279989 | 0,00005 |
| ENSMUSG00000021668 | Polk    | -1,378640056 | 0,00005 |
| ENSMUSG00000029547 | Ints1   | -0,827859998 | 0,00005 |
| ENSMUSG00000045969 | Ing1    | -0,736150026 | 0,00005 |
| ENSMUSG00000020946 | Gosr2   | 0,630100012  | 0,00005 |
| ENSMUSG00000026767 | Mindy3  | 0,630439997  | 0,00005 |
| ENSMUSG00000026179 | Pnkd    | 1,117759943  | 0,00005 |
| ENSMUSG00000042500 | Ago4    | 1,180070043  | 0,00005 |
| ENSMUSG00000030555 | Ttc23   | 1,566959977  | 0,00005 |

|                    |         |              |         |
|--------------------|---------|--------------|---------|
| ENSMUSG00000030108 | Slc6a13 | 2,192379951  | 0,00005 |
| ENSMUSG00000036110 | Slc17a2 | 2,19494009   | 0,00005 |
| ENSMUSG00000026542 | Apcs    | 2,448169947  | 0,00005 |
| ENSMUSG00000024131 | Slc3a1  | 2,637520075  | 0,00005 |
| ENSMUSG00000030116 | Mfap5   | -6,748030186 | 0,00005 |
| ENSMUSG00000043613 | Mmp3    | -4,869160175 | 0,00005 |
| ENSMUSG00000056832 | Ttc26   | -2,529809952 | 0,00005 |
| ENSMUSG00000022103 | Gfra2   | -1,955500007 | 0,00005 |
| ENSMUSG00000044674 | Fzd1    | -1,348309994 | 0,00005 |
| ENSMUSG00000038644 | Pold1   | -1,089179993 | 0,00005 |
| ENSMUSG00000017774 | Myo1c   | -1,025279999 | 0,00005 |
| ENSMUSG00000028413 | B4galt1 | -1,015939951 | 0,00005 |
| ENSMUSG00000026504 | Sdccag8 | -0,972639978 | 0,00005 |
| ENSMUSG00000037608 | Bclaf1  | -0,875370026 | 0,00005 |
| ENSMUSG00000027782 | Kpna4   | -0,782739997 | 0,00005 |
| ENSMUSG00000042133 | Ppig    | -0,677339971 | 0,00005 |
| ENSMUSG00000025027 | Xpnpep1 | -0,667689979 | 0,00005 |
| ENSMUSG00000014349 | Ube2z   | -0,579569995 | 0,00005 |
| ENSMUSG00000061455 | Stx17   | 0,804669976  | 0,00005 |
| ENSMUSG00000027495 | Fam210b | 0,822269976  | 0,00005 |
| ENSMUSG00000031627 | Irf2    | 1,089959979  | 0,00005 |
| ENSMUSG00000024120 | Lrpprc  | 1,104709983  | 0,00005 |
| ENSMUSG00000044252 | Osbpl1a | 1,670220017  | 0,00005 |
| ENSMUSG00000063428 | Ddo     | 1,837440014  | 0,00005 |
| ENSMUSG00000031138 | F9      | 2,130650043  | 0,00005 |
| ENSMUSG00000010476 | Ebf3    | -6,314479828 | 0,00005 |
| ENSMUSG00000030167 | Klrc1   | -4,092549801 | 0,00005 |
| ENSMUSG00000031327 | Chic1   | -2,354439974 | 0,00005 |
| ENSMUSG00000026347 | Tmem163 | -1,588340044 | 0,00005 |
| ENSMUSG00000030729 | Pgm2l1  | -1,503299952 | 0,00005 |
| ENSMUSG00000017747 | Ghdc    | 0,745630026  | 0,00005 |
| ENSMUSG00000037523 | Mavs    | 1,134770036  | 0,00005 |
| ENSMUSG00000032314 | Etfa    | 1,401870012  | 0,00005 |
| ENSMUSG00000068011 | Mkrn2os | 1,770470023  | 0,00005 |
| ENSMUSG00000001249 | Hpn     | 1,99059999   | 0,00005 |
| ENSMUSG00000031549 | Ido2    | 2,299910069  | 0,00005 |
| ENSMUSG00000041798 | Gck     | 2,353110075  | 0,00005 |
| ENSMUSG00000058579 | Cela2a  | 2,979850054  | 0,00005 |
| ENSMUSG00000027014 | Cwc22   | -0,686930001 | 0,00005 |
| ENSMUSG00000040213 | Kyat3   | 1,608199954  | 0,00005 |
| ENSMUSG00000030268 | Bcat1   | -6,187260151 | 0,00006 |
| ENSMUSG00000020354 | Sgcd    | -6,078999996 | 0,00006 |
| ENSMUSG00000075702 | Selenom | -2,674469948 | 0,00006 |
| ENSMUSG00000049687 | Pheta2  | -2,167020082 | 0,00006 |
| ENSMUSG00000026833 | Olfm1   | -2,166889906 | 0,00006 |
| ENSMUSG00000020108 | Ddit4   | -2,157530069 | 0,00006 |
| ENSMUSG00000024679 | Ms4a6d  | -1,653599977 | 0,00006 |

|                    |               |              |         |
|--------------------|---------------|--------------|---------|
| ENSMUSG00000051344 | Plekhm3       | -1,593919992 | 0,00006 |
| ENSMUSG00000028032 | Papss1        | -1,327900052 | 0,00006 |
| ENSMUSG00000024999 | Noc3l         | -0,946609974 | 0,00006 |
| ENSMUSG00000045248 | Med26         | -0,697669983 | 0,00006 |
| ENSMUSG00000055531 | Cpsf6         | -0,69423002  | 0,00006 |
| ENSMUSG00000029545 | Acads         | 1,440029979  | 0,00006 |
| ENSMUSG00000031842 | Pde4c         | 2,055330038  | 0,00006 |
| ENSMUSG00000046618 | Olfml2a       | -3,947129965 | 0,00006 |
| ENSMUSG00000048450 | Msx1          | -3,521090031 | 0,00006 |
| ENSMUSG00000026458 | Ppfia4        | -1,809270024 | 0,00006 |
| ENSMUSG00000044636 | Csrnp2        | -1,287029982 | 0,00006 |
| ENSMUSG00000028101 | Pias3         | -1,193109989 | 0,00006 |
| ENSMUSG00000004896 | Rrnad1        | -0,935360014 | 0,00006 |
| ENSMUSG00000024393 | Prrc2a        | -0,864090025 | 0,00006 |
| ENSMUSG00000024576 | Csnk1a1       | -0,575370014 | 0,00006 |
| ENSMUSG00000027411 | Vps16         | -0,447869986 | 0,00006 |
| ENSMUSG00000053012 | Krcc1         | 0,823899984  | 0,00006 |
| ENSMUSG00000051285 | Pcmt1         | 0,980560005  | 0,00006 |
| ENSMUSG00000039069 | Mtg2          | 0,986710012  | 0,00006 |
| ENSMUSG00000028182 | Lrriq3        | 1,268679976  | 0,00006 |
| ENSMUSG00000040740 | Slc25a34      | 1,486960053  | 0,00006 |
| ENSMUSG00000030170 | Wnt5b         | 1,683109999  | 0,00006 |
| ENSMUSG00000037709 | Fam13a        | 1,938570023  | 0,00006 |
| ENSMUSG00000039648 | Kyat1         | 2,210949898  | 0,00006 |
| ENSMUSG00000048022 | Tmem229a      | 2,783329964  | 0,00006 |
| ENSMUSG00000021171 | Esyt2         | -1,195989966 | 0,00006 |
| ENSMUSG00000070372 | Capza1        | -1,094709992 | 0,00006 |
| ENSMUSG00000020823 | Sec14l1       | -0,95739001  | 0,00006 |
| ENSMUSG00000031715 | Smarca5       | -0,769389987 | 0,00006 |
| ENSMUSG00000075000 | Nrbf2         | 0,587360024  | 0,00006 |
| ENSMUSG00000029672 | Fam3c         | 0,94423002   | 0,00006 |
| ENSMUSG00000032067 | Pts           | 0,997210026  | 0,00006 |
| ENSMUSG00000031924 | Cyb5b         | 1,097270012  | 0,00006 |
| ENSMUSG00000015806 | Qdpr          | 1,728459954  | 0,00006 |
| ENSMUSG00000028088 | Fmo5          | 2,036449909  | 0,00006 |
| ENSMUSG00000074063 | Osgin1        | 2,241209984  | 0,00006 |
| ENSMUSG00000069922 | Ces3a         | 2,506400108  | 0,00006 |
| ENSMUSG00000034774 | Dsg1c         | 2,693300009  | 0,00006 |
| ENSMUSG00000054752 | Fsd1l         | -2,513809919 | 0,00006 |
| ENSMUSG00000036006 | Ripor2        | -1,567600012 | 0,00006 |
| ENSMUSG00000049969 | Plekhf2       | 0,623510003  | 0,00006 |
| ENSMUSG00000002393 | Nr2f6         | 0,855480015  | 0,00006 |
| ENSMUSG00000056429 | Tgoln1        | 0,987209976  | 0,00006 |
| ENSMUSG00000052656 | Rnf103        | 1,073099971  | 0,00006 |
| ENSMUSG00000019906 | Lin7a         | 2,203969955  | 0,00006 |
| ENSMUSG00000047150 | 1700001C19Rik | 2,210050106  | 0,00006 |
| ENSMUSG00000041372 | B4galnt3      | 3,8348701    | 0,00006 |



|                    |           |              |         |
|--------------------|-----------|--------------|---------|
| ENSMUSG00000047246 | Hist1h2be | -2,403929949 | 0,00006 |
| ENSMUSG00000030401 | Rtn2      | -2,318559885 | 0,00006 |
| ENSMUSG00000021222 | Dcaf4     | -1,381639957 | 0,00006 |
| ENSMUSG00000020451 | Limk2     | -1,303050041 | 0,00006 |
| ENSMUSG00000038764 | Ptpn3     | 1,29392004   | 0,00006 |
| ENSMUSG00000028392 | Bspry     | -2,895580053 | 0,00007 |
| ENSMUSG00000028843 | Sh3bgrl3  | -1,98608005  | 0,00007 |
| ENSMUSG00000025026 | Add3      | -0,929970026 | 0,00007 |
| ENSMUSG00000033808 | Tmem87a   | -0,925939977 | 0,00007 |
| ENSMUSG00000022656 | Nectin3   | 0,853160024  | 0,00007 |
| ENSMUSG00000038967 | Pdk2      | 1,378110051  | 0,00007 |
| ENSMUSG00000029727 | Cyp3a13   | 2,050889969  | 0,00007 |
| ENSMUSG00000044550 | Tceal3    | -5,048299789 | 0,00007 |
| ENSMUSG00000006576 | Slc4a3    | -3,3589499   | 0,00007 |
| ENSMUSG00000026536 | Ifi211    | -2,308429956 | 0,00007 |
| ENSMUSG00000022773 | Ypel1     | -2,2802701   | 0,00007 |
| ENSMUSG00000024789 | Jak2      | -0,839569986 | 0,00007 |
| ENSMUSG00000020741 | Cluh      | 1,380239964  | 0,00007 |
| ENSMUSG00000032528 | Vipr1     | 1,864030004  | 0,00007 |
| ENSMUSG00000026620 | Mark1     | -1,838289976 | 0,00007 |
| ENSMUSG00000039405 | Prss23    | -1,82088995  | 0,00007 |
| ENSMUSG00000024163 | Mapk8ip3  | -1,666910052 | 0,00007 |
| ENSMUSG00000032420 | Nt5e      | -1,632529974 | 0,00007 |
| ENSMUSG00000026547 | Tagln2    | -1,415140033 | 0,00007 |
| ENSMUSG00000022185 | Acin1     | -0,59394002  | 0,00007 |
| ENSMUSG00000020283 | Pex13     | 1,059960008  | 0,00007 |
| ENSMUSG00000006378 | Gcat      | 1,586050034  | 0,00007 |
| ENSMUSG00000039431 | Mtmr7     | 1,796360016  | 0,00007 |
| ENSMUSG00000068874 | Selenbp1  | 1,802839994  | 0,00007 |
| ENSMUSG00000037942 | Crp       | 1,974519968  | 0,00007 |
| ENSMUSG00000031574 | Star      | -2,07682991  | 0,00007 |
| ENSMUSG00000035370 | Gm49322   | -1,414160013 | 0,00007 |
| ENSMUSG00000038481 | Cdk19     | -1,335489988 | 0,00007 |
| ENSMUSG00000000301 | Pemt      | 2,264499903  | 0,00007 |
| ENSMUSG00000045545 | Krt14     | -6,485610008 | 0,00007 |
| ENSMUSG00000098132 | Rassf10   | -4,380030155 | 0,00007 |
| ENSMUSG00000001930 | Vwf       | -1,825680017 | 0,00007 |
| ENSMUSG00000001288 | Rarg      | -1,355780005 | 0,00007 |
| ENSMUSG00000002222 | Rmnd5a    | 1,126109958  | 0,00007 |
| ENSMUSG00000038599 | Capn8     | 2,611759901  | 0,00007 |
| ENSMUSG00000079316 | Rab9      | 0,911849976  | 0,00007 |
| ENSMUSG00000037106 | Fer1l6    | -4,332729816 | 0,00008 |
| ENSMUSG00000025008 | Tctn3     | -1,970700026 | 0,00008 |
| ENSMUSG00000073802 | Cdkn2b    | -1,744490027 | 0,00008 |
| ENSMUSG00000020387 | Jade2     | -1,288930058 | 0,00008 |
| ENSMUSG00000015377 | Dennd6b   | -0,918340027 | 0,00008 |
| ENSMUSG00000032641 | Gpr19     | 0,946399987  | 0,00008 |

|                    |          |              |         |
|--------------------|----------|--------------|---------|
| ENSMUSG00000020183 | Cpm      | 1,664379954  | 0,00008 |
| ENSMUSG00000032511 | Scn5a    | -4,265540123 | 0,00008 |
| ENSMUSG00000051811 | Cox6b2   | -3,123780012 | 0,00008 |
| ENSMUSG00000032085 | Tagln    | -1,899009943 | 0,00008 |
| ENSMUSG00000027358 | Bmp2     | -1,380370021 | 0,00008 |
| ENSMUSG00000053580 | Tanc2    | -1,276649952 | 0,00008 |
| ENSMUSG00000000959 | Oxa1l    | 0,628000021  | 0,00008 |
| ENSMUSG00000024180 | Tmem8    | 1,576439977  | 0,00008 |
| ENSMUSG00000055172 | C1ra     | 1,973279953  | 0,00008 |
| ENSMUSG00000037686 | Aspg     | 2,19701004   | 0,00008 |
| ENSMUSG00000003665 | Has1     | -5,959159851 | 0,00008 |
| ENSMUSG00000027560 | Dok5     | -5,761340141 | 0,00008 |
| ENSMUSG00000007989 | Fzd3     | -3,221479893 | 0,00008 |
| ENSMUSG00000066113 | Adamtsl1 | -2,324179888 | 0,00008 |
| ENSMUSG00000090210 | Itga10   | -2,165280104 | 0,00008 |
| ENSMUSG00000031609 | Sap30    | -1,720950007 | 0,00008 |
| ENSMUSG00000021945 | Zmym2    | -0,751190007 | 0,00008 |
| ENSMUSG00000018651 | Tada2a   | -0,720269978 | 0,00008 |
| ENSMUSG00000029480 | Dhx37    | -0,591440022 | 0,00008 |
| ENSMUSG00000025492 | Ifitm3   | 1,678169966  | 0,00008 |
| ENSMUSG00000070407 | Hs3st3b1 | 1,837000012  | 0,00008 |
| ENSMUSG00000021620 | Acot12   | 2,038130045  | 0,00008 |
| ENSMUSG00000011382 | Dhdh     | 2,040529966  | 0,00008 |
| ENSMUSG00000050138 | Kcnk12   | -7,159890175 | 0,00008 |
| ENSMUSG00000019970 | Sgk1     | -1,735120058 | 0,00008 |
| ENSMUSG00000034848 | Ttc21b   | -1,235599995 | 0,00008 |
| ENSMUSG00000011960 | Ccnt1    | -0,798120022 | 0,00008 |
| ENSMUSG00000030965 | Abraxas2 | 0,58081001   | 0,00008 |
| ENSMUSG00000003923 | Tfam     | 1,079409957  | 0,00008 |
| ENSMUSG00000027366 | Sppl2a   | 1,124660015  | 0,00008 |
| ENSMUSG00000024395 | Lims2    | 1,16782999   | 0,00008 |
| ENSMUSG00000000876 | Pxmp4    | 1,290300012  | 0,00008 |
| ENSMUSG00000050199 | Lgr4     | 1,295060039  | 0,00008 |
| ENSMUSG00000032679 | Cd59a    | 1,581570029  | 0,00008 |
| ENSMUSG00000093930 | Hmgcs1   | 1,676570058  | 0,00008 |
| ENSMUSG00000055730 | Ces2a    | 2,529850006  | 0,00008 |
| ENSMUSG00000095630 | Igkv6-23 | 6,441329956  | 0,00008 |
| ENSMUSG00000074121 | Ntf5     | -4,068560123 | 0,00008 |
| ENSMUSG00000028256 | Odf2l    | -0,879989982 | 0,00008 |
| ENSMUSG00000033436 | Armcx2   | -1,437209964 | 0,00009 |
| ENSMUSG00000054499 | Dedd2    | 0,984709978  | 0,00009 |
| ENSMUSG00000027367 | Stard7   | 1,003190041  | 0,00009 |
| ENSMUSG00000029470 | P2rx4    | 1,222720027  | 0,00009 |
| ENSMUSG00000038188 | Scarf1   | 1,259639978  | 0,00009 |
| ENSMUSG00000038963 | Slco4a1  | -3,563879967 | 0,00009 |
| ENSMUSG00000031910 | Has3     | -3,16621995  | 0,00009 |
| ENSMUSG00000063146 | Clip2    | -1,153159976 | 0,00009 |

|                    |         |              |         |
|--------------------|---------|--------------|---------|
| ENSMUSG00000021460 | Auh     | 0,972339988  | 0,00009 |
| ENSMUSG00000019762 | lyd     | 2,115499973  | 0,00009 |
| ENSMUSG00000032352 | Lrrc1   | -2,209209919 | 0,00009 |
| ENSMUSG00000056498 | Tmem154 | -2,193959951 | 0,00009 |
| ENSMUSG00000062169 | Cnih4   | -1,162770033 | 0,00009 |
| ENSMUSG00000020101 | Vsir    | -1,141720057 | 0,00009 |
| ENSMUSG00000037235 | Mxd4    | 0,654030025  | 0,00009 |
| ENSMUSG00000027808 | Serp1   | 0,918569982  | 0,00009 |
| ENSMUSG00000020571 | Pdia6   | 1,002660036  | 0,00009 |
| ENSMUSG00000000171 | Sdhd    | 1,221130013  | 0,00009 |
| ENSMUSG00000023262 | Acy1    | 1,289680004  | 0,00009 |
| ENSMUSG00000024781 | Lipa    | 1,315160036  | 0,00009 |
| ENSMUSG00000024921 | Smarca2 | 1,371889949  | 0,00009 |
| ENSMUSG00000009614 | Sardh   | 2,187999964  | 0,00009 |
| ENSMUSG00000029630 | Cyp3a25 | 2,448489904  | 0,00009 |
| ENSMUSG00000050107 | Haspin  | -2,048089981 | 0,00009 |
| ENSMUSG00000018166 | Erbb3   | 2,421190023  | 0,00009 |
| ENSMUSG00000005125 | Ndrg1   | -2,548110008 | 0,00009 |
| ENSMUSG00000029832 | Nfe2l3  | -2,274569988 | 0,00009 |
| ENSMUSG00000039523 | Cep104  | -1,179100037 | 0,00009 |
| ENSMUSG00000035212 | Leprot  | -0,963100016 | 0,00009 |
| ENSMUSG00000033294 | Noc4l   | -0,642490029 | 0,00009 |
| ENSMUSG00000029119 | Man2b2  | 1,121739984  | 0,00009 |
| ENSMUSG00000034957 | Cebpa   | 1,787719965  | 0,00009 |
| ENSMUSG00000028979 | Masp2   | 2,163789988  | 0,00009 |
| ENSMUSG00000059674 | Cdh24   | -2,771359921 | 0,0001  |
| ENSMUSG00000038534 | Osbp17  | -1,677219987 | 0,0001  |
| ENSMUSG00000032478 | Nme6    | 1,403720021  | 0,0001  |
| ENSMUSG00000004558 | Ndrg2   | 1,823429942  | 0,0001  |
| ENSMUSG00000031886 | Ces2e   | 2,480600119  | 0,0001  |
| ENSMUSG00000026228 | Htr2b   | -5,452549934 | 0,0001  |
| ENSMUSG00000040729 | Cep126  | -4,093880177 | 0,0001  |
| ENSMUSG00000029359 | Tesc    | -2,62251997  | 0,0001  |
| ENSMUSG00000017861 | Mybl2   | -2,513469934 | 0,0001  |
| ENSMUSG00000047798 | Cd300lf | -2,006010056 | 0,0001  |
| ENSMUSG00000056708 | Ier5    | -1,510820031 | 0,0001  |
| ENSMUSG00000020614 | Fam20a  | 1,516129971  | 0,0001  |
| ENSMUSG00000074971 | Fibin   | -2,701709986 | 0,0001  |
| ENSMUSG00000001729 | Akt1    | -1,576519966 | 0,0001  |
| ENSMUSG00000020492 | Ska2    | -1,273100019 | 0,0001  |
| ENSMUSG00000027663 | Zmat3   | -1,105190039 | 0,0001  |
| ENSMUSG00000004460 | Dnajb11 | 0,905449986  | 0,0001  |
| ENSMUSG00000025795 | Rassf3  | 1,313150048  | 0,0001  |
| ENSMUSG00000001323 | Srr     | 1,504989982  | 0,0001  |
| ENSMUSG00000042453 | Reln    | 1,701060057  | 0,0001  |
| ENSMUSG00000001123 | Lgals9  | 1,705340028  | 0,0001  |
| ENSMUSG00000070645 | Ren1    | 4,356319904  | 0,0001  |

|                    |               |              |         |
|--------------------|---------------|--------------|---------|
| ENSMUSG00000030134 | Rasgef1a      | -3,924690008 | 0,0001  |
| ENSMUSG00000016498 | Pdcd1lg2      | -3,860830069 | 0,0001  |
| ENSMUSG00000034656 | Cacna1a       | -2,09897995  | 0,0001  |
| ENSMUSG00000041235 | Chd7          | -1,165560007 | 0,0001  |
| ENSMUSG00000020738 | Sumo2         | -0,814920008 | 0,0001  |
| ENSMUSG00000022765 | Snap29        | 0,704320014  | 0,0001  |
| ENSMUSG00000027010 | Slc25a12      | 0,707520008  | 0,0001  |
| ENSMUSG00000015363 | Trabd         | 1,029049993  | 0,0001  |
| ENSMUSG00000037966 | Ninj1         | 1,078390002  | 0,0001  |
| ENSMUSG00000075704 | Txnrd2        | 1,214709997  | 0,0001  |
| ENSMUSG00000031645 | F11           | 2,279829979  | 0,0001  |
| ENSMUSG00000025139 | Tollip        | 0,387620002  | 0,0001  |
| ENSMUSG00000004070 | Hmox2         | 0,880840003  | 0,0001  |
| ENSMUSG00000069045 | Ddx3y         | 0,904420018  | 0,0001  |
| ENSMUSG00000028672 | Hmgcl         | 1,706220031  | 0,0001  |
| ENSMUSG00000075031 | Hist1h2bb     | -5,185560226 | 0,00011 |
| ENSMUSG00000030093 | Wnt7a         | -4,040410042 | 0,00011 |
| ENSMUSG00000056076 | Eif3b         | -0,548340023 | 0,00011 |
| ENSMUSG00000020621 | Rdh14         | 1,092190027  | 0,00011 |
| ENSMUSG00000096606 | Tpbgl         | 2,125540018  | 0,00011 |
| ENSMUSG00000068856 | Sf3b4         | -1,331760049 | 0,00011 |
| ENSMUSG00000042303 | Sgsm3         | -1,224760056 | 0,00011 |
| ENSMUSG00000030881 | Arfip2        | -0,894150019 | 0,00011 |
| ENSMUSG00000044442 | N6amt1        | 0,632910013  | 0,00011 |
| ENSMUSG00000049339 | Retreg2       | 1,094529986  | 0,00011 |
| ENSMUSG00000038323 | 1700066M21Rik | 1,327649951  | 0,00011 |
| ENSMUSG00000050541 | Adra1b        | 2,383869886  | 0,00011 |
| ENSMUSG00000022512 | Cldn1         | 2,467590094  | 0,00011 |
| ENSMUSG00000028581 | Laptm5        | -1,465250015 | 0,00011 |
| ENSMUSG00000020422 | Tns3          | -1,392369986 | 0,00011 |
| ENSMUSG00000031537 | Ikbkb         | 0,49823001   | 0,00011 |
| ENSMUSG00000043257 | Pigv          | 0,780629992  | 0,00011 |
| ENSMUSG00000001700 | Gramd3        | 0,906409979  | 0,00011 |
| ENSMUSG00000028572 | Hook1         | 1,774749994  | 0,00011 |
| ENSMUSG00000032898 | Fbxo21        | 1,802510023  | 0,00011 |
| ENSMUSG00000060371 | Caln1         | 2,045979977  | 0,00011 |
| ENSMUSG00000043629 | 1700019D03Rik | 2,618750095  | 0,00011 |
| ENSMUSG00000045215 | Asxl3         | -6,882450104 | 0,00011 |
| ENSMUSG00000050822 | Slc29a4       | -4,825250149 | 0,00011 |
| ENSMUSG00000031497 | Tnfsf13b      | -2,578490019 | 0,00011 |
| ENSMUSG00000052533 | Nup188        | -1,428930044 | 0,00011 |
| ENSMUSG00000034024 | Cct2          | -0,80230999  | 0,00011 |
| ENSMUSG00000037815 | Ctnna1        | -0,787199974 | 0,00011 |
| ENSMUSG00000045624 | Esf1          | -0,753859997 | 0,00011 |
| ENSMUSG00000055900 | Tmem69        | 1,077270031  | 0,00011 |
| ENSMUSG00000002944 | Cd36          | 1,787649989  | 0,00011 |
| ENSMUSG00000064120 | Mocs1         | 2,031239986  | 0,00011 |

|                    |               |              |         |
|--------------------|---------------|--------------|---------|
| ENSMUSG00000037552 | Plekhg2       | -1,582460046 | 0,00011 |
| ENSMUSG00000036435 | Exoc1         | -0,738730013 | 0,00011 |
| ENSMUSG00000022136 | Dnajc3        | 1,326390028  | 0,00011 |
| ENSMUSG00000057596 | Trim30d       | 1,354369998  | 0,00011 |
| ENSMUSG00000032607 | Amt           | 1,918179989  | 0,00011 |
| ENSMUSG00000069456 | Rdh16         | 2,144649982  | 0,00011 |
| ENSMUSG00000074207 | Adh1          | 2,404900074  | 0,00011 |
| ENSMUSG00000004952 | Rasa4         | -1,49932003  | 0,00012 |
| ENSMUSG00000025223 | Ldb1          | -1,359830022 | 0,00012 |
| ENSMUSG00000038976 | Ppp1r9b       | -1,262330055 | 0,00012 |
| ENSMUSG00000064061 | Dzip3         | -1,221750021 | 0,00012 |
| ENSMUSG00000024137 | E4f1          | -0,790380001 | 0,00012 |
| ENSMUSG00000032265 | Tent5a        | 1,189669967  | 0,00012 |
| ENSMUSG00000051147 | Nat2          | 1,471439958  | 0,00012 |
| ENSMUSG00000022996 | Wnt10b        | -5,865009785 | 0,00012 |
| ENSMUSG00000038718 | Pbx3          | -1,688949943 | 0,00012 |
| ENSMUSG00000029504 | Ddx51         | -0,665459991 | 0,00012 |
| ENSMUSG00000022615 | Tymp          | 2,304150105  | 0,00012 |
| ENSMUSG00000031493 | Ggn           | -2,51473999  | 0,00012 |
| ENSMUSG00000025272 | Tro           | -2,116300106 | 0,00012 |
| ENSMUSG00000020918 | Kat2a         | -0,856469989 | 0,00012 |
| ENSMUSG00000025330 | Padi4         | -3,032680035 | 0,00012 |
| ENSMUSG00000032966 | Fkbp1a        | -1,364779949 | 0,00012 |
| ENSMUSG00000008200 | Fnbp4         | -1,242310047 | 0,00012 |
| ENSMUSG00000033350 | Chst2         | -1,03718996  | 0,00012 |
| ENSMUSG00000038141 | Tmem181a      | -1,012809992 | 0,00012 |
| ENSMUSG00000030403 | Vasp          | -0,946020007 | 0,00012 |
| ENSMUSG00000031227 | Magee1        | -0,924290001 | 0,00012 |
| ENSMUSG00000032580 | Rbm5          | -0,714659989 | 0,00012 |
| ENSMUSG00000028102 | Pex11b        | 0,521040022  | 0,00012 |
| ENSMUSG00000021273 | Fdft1         | 1,46973002   | 0,00012 |
| ENSMUSG00000020150 | Gamt          | 1,793400049  | 0,00012 |
| ENSMUSG00000056648 | Hoxb8         | -4,108389854 | 0,00012 |
| ENSMUSG00000037411 | Serpine1      | -3,359740019 | 0,00012 |
| ENSMUSG00000095677 | Dynlt1f       | -2,157510042 | 0,00012 |
| ENSMUSG00000056313 | Tcim          | -1,641549945 | 0,00012 |
| ENSMUSG00000022064 | Pibf1         | -0,947430015 | 0,00012 |
| ENSMUSG00000024811 | Tnks2         | -0,799809992 | 0,00012 |
| ENSMUSG00000044148 | 1810030007Rik | -0,787630022 | 0,00012 |
| ENSMUSG00000018733 | Pex12         | 0,779779971  | 0,00012 |
| ENSMUSG00000025193 | Cutc          | 1,169319987  | 0,00012 |
| ENSMUSG00000028743 | Akr7a5        | 2,160660028  | 0,00012 |
| ENSMUSG00000032397 | Tipin         | -1,192710042 | 0,00013 |
| ENSMUSG00000071713 | Csf2rb        | -1,01662004  | 0,00013 |
| ENSMUSG00000025529 | Zfp711        | -6,19961977  | 0,00013 |
| ENSMUSG00000031163 | Glod5         | -3,948539972 | 0,00013 |
| ENSMUSG00000060487 | Samd5         | -3,819439888 | 0,00013 |

|                    |               |              |         |
|--------------------|---------------|--------------|---------|
| ENSMUSG00000031303 | Map3k15       | -2,647919893 | 0,00013 |
| ENSMUSG00000027496 | Aurka         | -1,498479962 | 0,00013 |
| ENSMUSG00000029146 | Snx17         | -1,220409989 | 0,00013 |
| ENSMUSG00000059939 | 9430015G10Rik | -1,111809969 | 0,00013 |
| ENSMUSG00000056537 | Rlim          | -0,72755003  | 0,00013 |
| ENSMUSG00000033186 | Mzt1          | -0,602230012 | 0,00013 |
| ENSMUSG00000011831 | Evi5          | 1,379909992  | 0,00013 |
| ENSMUSG00000006386 | Tek           | 1,469099998  | 0,00013 |
| ENSMUSG00000059742 | Kcnh7         | 1,690430045  | 0,00013 |
| ENSMUSG00000024857 | Cabp2         | 2,541870117  | 0,00013 |
| ENSMUSG00000031767 | Nudt7         | 2,707210064  | 0,00013 |
| ENSMUSG00000031561 | Tenm3         | -1,693750024 | 0,00013 |
| ENSMUSG00000055447 | Cd47          | 0,581910014  | 0,00013 |
| ENSMUSG00000025271 | Pfkfb1        | 1,624089956  | 0,00013 |
| ENSMUSG00000031444 | F10           | 1,987370014  | 0,00013 |
| ENSMUSG00000000295 | Hddc2         | -2,343610048 | 0,00013 |
| ENSMUSG00000041025 | Iffo2         | -1,249500036 | 0,00013 |
| ENSMUSG00000024805 | Pcgf5         | -0,721069992 | 0,00013 |
| ENSMUSG00000028676 | Srsf10        | -0,628279984 | 0,00013 |
| ENSMUSG00000015341 | Golga7        | 0,458090007  | 0,00013 |
| ENSMUSG00000030287 | Itpr2         | 0,980599999  | 0,00013 |
| ENSMUSG00000027865 | Gdap2         | 1,029440045  | 0,00013 |
| ENSMUSG00000062980 | Cped1         | 2,043190002  | 0,00013 |
| ENSMUSG00000055430 | Nap115        | -4,698560238 | 0,00013 |
| ENSMUSG00000035829 | Ppp1r26       | -3,453210115 | 0,00013 |
| ENSMUSG00000033788 | Dysf          | -1,100270033 | 0,00013 |
| ENSMUSG00000030410 | Dmwd          | -1,005200028 | 0,00013 |
| ENSMUSG00000031311 | Nono          | -0,761699975 | 0,00013 |
| ENSMUSG00000022020 | Naa16         | -0,641889989 | 0,00013 |
| ENSMUSG00000020173 | Cobl          | 1,78839004   | 0,00013 |
| ENSMUSG00000026779 | Mastl         | -1,872099996 | 0,00014 |
| ENSMUSG00000069094 | Pde7a         | -1,077399969 | 0,00014 |
| ENSMUSG00000031168 | Ebp           | 1,659909964  | 0,00014 |
| ENSMUSG00000036186 | Fam69b        | -3,120239973 | 0,00014 |
| ENSMUSG00000034255 | Arhgap27      | -1,677350044 | 0,00014 |
| ENSMUSG00000034793 | G6pc3         | -1,307209969 | 0,00014 |
| ENSMUSG00000059555 | Tor4a         | -1,080129981 | 0,00014 |
| ENSMUSG00000042410 | Agps          | -0,95085001  | 0,00014 |
| ENSMUSG00000028483 | Snapc3        | -0,934000015 | 0,00014 |
| ENSMUSG00000070699 | Sars2         | 0,80339998   | 0,00014 |
| ENSMUSG00000024140 | Epas1         | 1,64470005   | 0,00014 |
| ENSMUSG00000069633 | Pex11g        | 1,851209998  | 0,00014 |
| ENSMUSG00000044986 | Tst           | 2,082930088  | 0,00014 |
| ENSMUSG00000030353 | Tead4         | -2,14508009  | 0,00014 |
| ENSMUSG00000055612 | Cdca7         | -1,624130011 | 0,00014 |
| ENSMUSG00000059878 | Zfp422        | 0,573490024  | 0,00014 |
| ENSMUSG00000025200 | Cwf19l1       | 0,770160019  | 0,00014 |

|                    |          |              |         |
|--------------------|----------|--------------|---------|
| ENSMUSG00000040146 | Rgl3     | 1,191910028  | 0,00014 |
| ENSMUSG00000036452 | Arhgap26 | 1,259359956  | 0,00014 |
| ENSMUSG00000062995 | Ica1     | 1,764269948  | 0,00014 |
| ENSMUSG00000021228 | Acot3    | 2,942369938  | 0,00014 |
| ENSMUSG00000022490 | Ppp1r1a  | -5,932710171 | 0,00014 |
| ENSMUSG00000048572 | Tmem252  | -3,31524992  | 0,00014 |
| ENSMUSG00000026196 | Bard1    | -2,659019947 | 0,00014 |
| ENSMUSG00000066800 | Rnase1   | -0,898760021 | 0,00014 |
| ENSMUSG00000048826 | Dact2    | 1,203439951  | 0,00014 |
| ENSMUSG00000025545 | Clybl    | 1,304209948  | 0,00014 |
| ENSMUSG00000028167 | Bdh2     | 1,643820047  | 0,00014 |
| ENSMUSG00000030107 | Usp18    | 1,657580018  | 0,00014 |
| ENSMUSG00000086784 | Isoc2a   | 1,858590007  | 0,00014 |
| ENSMUSG00000079355 | Ackr4    | 2,334009886  | 0,00014 |
| ENSMUSG00000030228 | Pik3c2g  | 2,517270088  | 0,00014 |
| ENSMUSG00000030378 | Sult2a8  | 2,742789984  | 0,00014 |
| ENSMUSG00000042845 | Wfdc12   | 4,591939926  | 0,00014 |
| ENSMUSG00000032783 | Troap    | -2,556979895 | 0,00014 |
| ENSMUSG00000032555 | Topbp1   | -1,226609945 | 0,00014 |
| ENSMUSG00000025745 | Hadha    | 1,065420032  | 0,00014 |
| ENSMUSG00000091387 | Gcnt4    | 1,769240022  | 0,00014 |
| ENSMUSG00000022425 | Enpp2    | 1,97705996   | 0,00014 |
| ENSMUSG00000040413 | Timd2    | 2,222990036  | 0,00014 |
| ENSMUSG00000001750 | Tcirg1   | -0,747759998 | 0,00015 |
| ENSMUSG00000028989 | Angptl7  | -3,358089924 | 0,00015 |
| ENSMUSG00000029093 | Sorcs2   | -2,657749891 | 0,00015 |
| ENSMUSG00000075122 | Cd80     | -2,102410078 | 0,00015 |
| ENSMUSG00000069631 | Strada   | -1,30727005  | 0,00015 |
| ENSMUSG00000030522 | Mtmr10   | 0,642050028  | 0,00015 |
| ENSMUSG00000058883 | Zfp708   | 0,912299991  | 0,00015 |
| ENSMUSG00000022562 | Oplah    | 0,974600017  | 0,00015 |
| ENSMUSG00000044279 | Crb3     | 1,64744997   | 0,00015 |
| ENSMUSG00000026691 | Fmo3     | 5,502970219  | 0,00015 |
| ENSMUSG00000031997 | Trpc6    | -6,629399776 | 0,00015 |
| ENSMUSG00000025491 | Ifitm1   | -1,694519997 | 0,00015 |
| ENSMUSG00000000673 | Hao      | 2,294059992  | 0,00015 |
| ENSMUSG00000033419 | Snap91   | -4,459549904 | 0,00015 |
| ENSMUSG00000075040 | Zfp408   | -1,014410019 | 0,00015 |
| ENSMUSG00000027243 | Harbi1   | 1,009160042  | 0,00015 |
| ENSMUSG00000001348 | Acp5     | 1,196830034  | 0,00015 |
| ENSMUSG00000051043 | Gprc5c   | 1,686570048  | 0,00015 |
| ENSMUSG00000061292 | Cyp3a59  | 2,537420034  | 0,00015 |
| ENSMUSG00000025413 | Ttc4     | 0,45194      | 0,00015 |
| ENSMUSG00000034190 | Chmp7    | 0,735199988  | 0,00015 |
| ENSMUSG00000025823 | Pdia4    | 1,031170011  | 0,00015 |
| ENSMUSG00000026866 | Kynu     | 2,064450026  | 0,00015 |
| ENSMUSG00000059119 | Nap114   | -0,508059978 | 0,00016 |



|                    |          |              |         |
|--------------------|----------|--------------|---------|
| ENSMUSG00000032047 | Acat1    | 1,421440005  | 0,00016 |
| ENSMUSG00000031613 | Hpgd     | 2,05456996   | 0,00016 |
| ENSMUSG00000008601 | Rab25    | -3,108829975 | 0,00016 |
| ENSMUSG00000042622 | Maff     | -1,388689995 | 0,00016 |
| ENSMUSG00000030272 | Camk1    | -1,149580002 | 0,00016 |
| ENSMUSG00000001415 | Smg5     | -0,813189983 | 0,00016 |
| ENSMUSG00000003527 | Ess2     | -0,639159977 | 0,00016 |
| ENSMUSG00000032606 | Nicn1    | 0,763670027  | 0,00016 |
| ENSMUSG00000064262 | Gimap8   | 1,152879953  | 0,00016 |
| ENSMUSG00000050144 | Slc25a44 | 1,230759978  | 0,00016 |
| ENSMUSG00000033377 | Palmd    | 1,251219988  | 0,00016 |
| ENSMUSG00000046794 | Ppp1r3b  | 1,879150033  | 0,00016 |
| ENSMUSG00000028044 | Cks1b    | -1,777179956 | 0,00016 |
| ENSMUSG00000033769 | Exoc6b   | -1,002629995 | 0,00016 |
| ENSMUSG00000021891 | Mettl6   | -0,52026999  | 0,00016 |
| ENSMUSG00000034714 | Ttyh2    | 0,879369974  | 0,00016 |
| ENSMUSG00000038217 | Tlcd2    | 1,792840004  | 0,00016 |
| ENSMUSG00000033318 | Gstt2    | 2,020400047  | 0,00016 |
| ENSMUSG00000011034 | Slc5a1   | 2,271389961  | 0,00016 |
| ENSMUSG00000001098 | Kctd10   | -2,190680027 | 0,00016 |
| ENSMUSG00000038902 | Pogz     | -0,917439997 | 0,00016 |
| ENSMUSG00000027286 | Lrrc57   | 0,580820024  | 0,00016 |
| ENSMUSG00000025086 | Trub1    | 0,728479981  | 0,00016 |
| ENSMUSG00000050973 | Gdpgp1   | 0,802559972  | 0,00016 |
| ENSMUSG00000037722 | Gnpnat1  | 1,145390034  | 0,00016 |
| ENSMUSG00000005907 | Pex1     | 1,194039941  | 0,00016 |
| ENSMUSG00000028399 | Ptprd    | 2,061539888  | 0,00016 |
| ENSMUSG00000058626 | Capn11   | 4,714839935  | 0,00016 |
| ENSMUSG00000042724 | Map3k9   | -3,304100037 | 0,00016 |
| ENSMUSG00000024188 | Luc7l    | -0,524259984 | 0,00016 |
| ENSMUSG00000022752 | Tomm70a  | 0,626359999  | 0,00016 |
| ENSMUSG00000044934 | Zfp367   | 0,682430029  | 0,00016 |
| ENSMUSG00000030967 | Zranb1   | 0,806119978  | 0,00016 |
| ENSMUSG00000022890 | Atp5j    | 1,059610009  | 0,00016 |
| ENSMUSG00000030313 | Dennd5b  | 1,708179951  | 0,00017 |
| ENSMUSG00000079092 | Prl2c2   | -9,30821991  | 0,00017 |
| ENSMUSG00000004961 | Syt5     | -5,715929985 | 0,00017 |
| ENSMUSG00000027938 | Creb3l4  | -2,315320015 | 0,00017 |
| ENSMUSG00000030055 | Rab43    | 1,202219963  | 0,00017 |
| ENSMUSG00000030688 | Stard10  | 2,047879934  | 0,00017 |
| ENSMUSG00000038119 | Cdon     | -2,16869998  | 0,00017 |
| ENSMUSG00000032400 | Zwilch   | -1,906810045 | 0,00017 |
| ENSMUSG00000025607 | Copg2    | 0,512920022  | 0,00017 |
| ENSMUSG00000001751 | Naglu    | 0,76542002   | 0,00017 |
| ENSMUSG00000033105 | Lss      | 1,60089004   | 0,00017 |
| ENSMUSG00000049044 | Ragef4   | 1,645589948  | 0,00017 |
| ENSMUSG00000027173 | Depdc7   | 1,739650011  | 0,00017 |

|                     |               |              |         |
|---------------------|---------------|--------------|---------|
| ENSMUSG00000022875  | Kng1          | 2,117039919  | 0,00017 |
| ENSMUSG00000002992  | Apoc2         | 2,35097003   | 0,00017 |
| ENSMUSG00000049436  | Upk1b         | -4,005569935 | 0,00017 |
| ENSMUSG000000032135 | Mcam          | -1,432109952 | 0,00017 |
| ENSMUSG000000036769 | Wdr44         | -1,21322     | 0,00017 |
| ENSMUSG000000021492 | F12           | 1,99285996   | 0,00017 |
| ENSMUSG00000006711  | D130043K22Rik | 2,288480043  | 0,00017 |
| ENSMUSG000000015879 | Fam184b       | 2,321739912  | 0,00017 |
| ENSMUSG000000074491 | Clec4g        | 2,388979912  | 0,00017 |
| ENSMUSG000000026484 | Rnf2          | -0,566229999 | 0,00017 |
| ENSMUSG000000032702 | Kank1         | 1,439409971  | 0,00017 |
| ENSMUSG000000034371 | Tkfc          | 1,869369984  | 0,00017 |
| ENSMUSG000000032591 | Mst1          | 1,973129988  | 0,00017 |
| ENSMUSG000000094862 | Ighv1-56      | 5,824140072  | 0,00017 |
| ENSMUSG000000068877 | Selenbp2      | 2,809720039  | 0,00018 |
| ENSMUSG000000035683 | Melk          | -1,921589971 | 0,00018 |
| ENSMUSG000000017999 | Ddx27         | -0,701650023 | 0,00018 |
| ENSMUSG000000064373 | Selenop       | 1,974519968  | 0,00018 |
| ENSMUSG000000074336 | Apoc4         | 2,429759979  | 0,00018 |
| ENSMUSG000000020990 | Cdkl1         | -3,859549999 | 0,00018 |
| ENSMUSG000000046572 | Zfp518b       | -1,759580016 | 0,00018 |
| ENSMUSG000000007080 | Pole          | -1,626080036 | 0,00018 |
| ENSMUSG000000007458 | M6pr          | 0,44106999   | 0,00018 |
| ENSMUSG000000034707 | Gns           | 0,677129984  | 0,00018 |
| ENSMUSG000000040029 | Ipo8          | 0,930289984  | 0,00018 |
| ENSMUSG000000030089 | Slc41a3       | 1,588060021  | 0,00018 |
| ENSMUSG000000030513 | Pcsk6         | 1,654579997  | 0,00018 |
| ENSMUSG000000090291 | Lrrc10b       | -6,395730019 | 0,00018 |
| ENSMUSG000000044927 | H1fx          | -2,589999914 | 0,00018 |
| ENSMUSG000000032402 | Smad3         | -1,152529955 | 0,00018 |
| ENSMUSG000000022556 | Hsf1          | -0,653720021 | 0,00018 |
| ENSMUSG000000002728 | Naa20         | -0,631139994 | 0,00018 |
| ENSMUSG000000051396 | Gm45902       | -0,57881999  | 0,00018 |
| ENSMUSG000000026473 | Glul          | 1,351879954  | 0,00018 |
| ENSMUSG000000022419 | Deptor        | 1,799970031  | 0,00018 |
| ENSMUSG000000049971 | Glt1d1        | 2,092550039  | 0,00018 |
| ENSMUSG000000050821 | Fam131a       | -2,027450085 | 0,00018 |
| ENSMUSG000000026470 | Stx6          | -0,872430027 | 0,00018 |
| ENSMUSG000000024826 | Dpf2          | -0,655439973 | 0,00018 |
| ENSMUSG000000025130 | P4hb          | 0,909370005  | 0,00018 |
| ENSMUSG000000045160 | Bola3         | 1,34465003   | 0,00018 |
| ENSMUSG000000089678 | Agxt2         | 2,051179886  | 0,00018 |
| ENSMUSG000000031109 | Enox2         | 0,729080021  | 0,00019 |
| ENSMUSG000000020251 | Glt8d2        | -3,358330011 | 0,00019 |
| ENSMUSG000000027331 | Knstrn        | -1,718979955 | 0,00019 |
| ENSMUSG000000073599 | Ecscr         | -1,65297997  | 0,00019 |
| ENSMUSG000000033233 | Trim45        | -1,627030015 | 0,00019 |

|                    |               |              |         |
|--------------------|---------------|--------------|---------|
| ENSMUSG00000024423 | Impact        | -0,929539979 | 0,00019 |
| ENSMUSG00000020755 | Sap30bp       | -0,560720026 | 0,00019 |
| ENSMUSG00000021779 | Thrb          | 1,788579941  | 0,00019 |
| ENSMUSG00000026189 | Pecr          | 1,954789996  | 0,00019 |
| ENSMUSG00000002459 | Rgs20         | -6,512420177 | 0,00019 |
| ENSMUSG00000032323 | Cyp11a1       | -4,720510006 | 0,00019 |
| ENSMUSG00000024186 | Rgs11         | -3,102030039 | 0,00019 |
| ENSMUSG00000037679 | Inf2          | -1,146950006 | 0,00019 |
| ENSMUSG00000044147 | Arf6          | -0,97596997  | 0,00019 |
| ENSMUSG00000074811 | Hps6          | -0,898109972 | 0,00019 |
| ENSMUSG00000015889 | Lta4h         | -0,507439971 | 0,00019 |
| ENSMUSG00000041733 | Coq5          | 0,626980007  | 0,00019 |
| ENSMUSG00000007777 | 0610009B22Rik | 0,99752003   | 0,00019 |
| ENSMUSG00000021930 | Spryd7        | 1,103160024  | 0,00019 |
| ENSMUSG00000020877 | Scrn2         | 1,513380051  | 0,00019 |
| ENSMUSG00000062563 | Cys1          | 2,10007      | 0,00019 |
| ENSMUSG00000027249 | F2            | 2,116529942  | 0,00019 |
| ENSMUSG00000031298 | Adgrg2        | -2,430649996 | 0,00019 |
| ENSMUSG00000061130 | Ppm1b         | 0,788030028  | 0,00019 |
| ENSMUSG00000061353 | Cxcl12        | 1,506530046  | 0,00019 |
| ENSMUSG00000064065 | Ipcef1        | 2,656140089  | 0,00019 |
| ENSMUSG00000042439 | Zfp532        | -1,743950009 | 0,00019 |
| ENSMUSG00000052102 | Gnpda1        | -1,158720016 | 0,00019 |
| ENSMUSG00000046623 | Gjb4          | -7,843939781 | 0,0002  |
| ENSMUSG00000070000 | Fcho1         | -1,412320018 | 0,0002  |
| ENSMUSG00000090213 | Tmem189       | -1,016860008 | 0,0002  |
| ENSMUSG00000025277 | Abhd6         | 0,907069981  | 0,0002  |
| ENSMUSG0000004446  | Bid           | 1,175390005  | 0,0002  |
| ENSMUSG00000019082 | Slc25a22      | 1,228440046  | 0,0002  |
| ENSMUSG00000061232 | H2-K1         | 1,496170044  | 0,0002  |
| ENSMUSG00000032028 | Nxpe2         | 1,839920044  | 0,0002  |
| ENSMUSG00000020635 | Fkbp1b        | -2,321810007 | 0,0002  |
| ENSMUSG00000070044 | Fam149a       | 0,906930029  | 0,0002  |
| ENSMUSG00000041012 | Cmtm8         | 1,940189958  | 0,0002  |
| ENSMUSG00000041895 | Wipi1         | -1,000650048 | 0,0002  |
| ENSMUSG00000022704 | Qtrt2         | -0,855790019 | 0,0002  |
| ENSMUSG00000068823 | Csde1         | -0,45043999  | 0,0002  |
| ENSMUSG00000052906 | Ubxn8         | 0,606220007  | 0,0002  |
| ENSMUSG00000017801 | Mlx           | 0,801450014  | 0,0002  |
| ENSMUSG00000048217 | Nags          | 2,013829947  | 0,0002  |
| ENSMUSG00000044320 | 1700001O22Rik | -4,513909817 | 0,0002  |
| ENSMUSG00000047250 | Ptgs1         | -1,446619987 | 0,00021 |
| ENSMUSG00000040415 | Dtx3          | -1,409360051 | 0,00021 |
| ENSMUSG00000059866 | Tnip2         | -0,99721998  | 0,00021 |
| ENSMUSG00000024750 | Zfand5        | -0,536880016 | 0,00021 |
| ENSMUSG00000017119 | Nbr1          | 0,947009981  | 0,00021 |
| ENSMUSG00000019437 | Tlcd1         | 1,151870012  | 0,00021 |

|                    |          |              |         |
|--------------------|----------|--------------|---------|
| ENSMUSG00000033114 | Slc35d2  | 1,395840049  | 0,00021 |
| ENSMUSG00000032018 | Sc5d     | 1,940690041  | 0,00021 |
| ENSMUSG00000008540 | Mgst1    | 2,09085989   | 0,00021 |
| ENSMUSG00000031642 | Sh3rf1   | -1,308570027 | 0,00021 |
| ENSMUSG00000034165 | Ccnd3    | -0,873239994 | 0,00021 |
| ENSMUSG00000040356 | Skiv2l   | 0,520030022  | 0,00021 |
| ENSMUSG00000032812 | Arap1    | 0,819480002  | 0,00021 |
| ENSMUSG00000057375 | Yipf1    | 0,856700003  | 0,00021 |
| ENSMUSG00000020258 | Glyctk   | 2,051939964  | 0,00021 |
| ENSMUSG00000020974 | Pole2    | -1,842759967 | 0,00021 |
| ENSMUSG00000035597 | Prpf39   | -0,972920001 | 0,00021 |
| ENSMUSG00000006456 | Rbm14    | -0,67177999  | 0,00021 |
| ENSMUSG00000026383 | Epb41l5  | 1,513030052  | 0,00021 |
| ENSMUSG00000029563 | Foxp2    | 1,542189956  | 0,00021 |
| ENSMUSG00000062480 | Acat3    | 1,856709957  | 0,00021 |
| ENSMUSG00000026039 | Sgo2a    | -2,36383009  | 0,00021 |
| ENSMUSG00000004951 | Hspb1    | -2,044490099 | 0,00021 |
| ENSMUSG00000060802 | B2m      | 1,449890018  | 0,00021 |
| ENSMUSG00000058260 | Serpina9 | 3,534440041  | 0,00021 |
| ENSMUSG00000031708 | Tecr     | 0,813759983  | 0,00022 |
| ENSMUSG00000029817 | Tra2a    | -1,409340024 | 0,00022 |
| ENSMUSG00000045598 | Zfp553   | -0,771809995 | 0,00022 |
| ENSMUSG00000024479 | Mal2     | 1,752879977  | 0,00022 |
| ENSMUSG00000025002 | Cyp2c55  | 1,860170007  | 0,00022 |
| ENSMUSG00000026840 | Lamc3    | -3,35965991  | 0,00022 |
| ENSMUSG00000047388 | Atmin    | -0,634679973 | 0,00022 |
| ENSMUSG00000045410 | Akr1e1   | 0,986010015  | 0,00022 |
| ENSMUSG00000064341 | mt-Nd1   | 0,99624002   | 0,00022 |
| ENSMUSG00000037583 | Nr0b2    | 2,619630098  | 0,00022 |
| ENSMUSG00000022553 | Maf1     | -1,106680036 | 0,00022 |
| ENSMUSG00000020248 | Nfyb     | 0,717119992  | 0,00022 |
| ENSMUSG00000022445 | Cyp2d26  | 2,167000055  | 0,00022 |
| ENSMUSG00000029123 | Stk32b   | -6,153510094 | 0,00022 |
| ENSMUSG00000005950 | P2rx5    | -3,188640118 | 0,00022 |
| ENSMUSG00000028391 | Wdr31    | -2,587249994 | 0,00022 |
| ENSMUSG00000046006 | Gapt     | -2,456239939 | 0,00022 |
| ENSMUSG00000018377 | Vezf1    | -0,965309978 | 0,00022 |
| ENSMUSG00000022314 | Rad21    | -0,957840025 | 0,00022 |
| ENSMUSG00000024604 | Rbm22    | -0,840870023 | 0,00022 |
| ENSMUSG00000005615 | Pcyt1a   | 0,898259997  | 0,00022 |
| ENSMUSG00000039616 | Mocos    | 1,545969963  | 0,00022 |
| ENSMUSG00000036073 | Galt     | 1,410380006  | 0,00023 |
| ENSMUSG00000020122 | Egfr     | 1,462450027  | 0,00023 |
| ENSMUSG00000022090 | Pdlim2   | -2,052150011 | 0,00023 |
| ENSMUSG00000027303 | Ptpa     | -1,043889999 | 0,00023 |
| ENSMUSG00000003848 | Nob1     | -0,940439999 | 0,00023 |
| ENSMUSG00000021666 | Gfm2     | 0,88985002   | 0,00023 |

|                    |               |              |         |
|--------------------|---------------|--------------|---------|
| ENSMUSG00000031119 | Gpc4          | 1,130069971  | 0,00023 |
| ENSMUSG00000032375 | Aph1b         | 1,3398       | 0,00023 |
| ENSMUSG00000030031 | Kbtbd8        | 1,415330052  | 0,00023 |
| ENSMUSG00000028158 | Mttp          | 1,810269952  | 0,00023 |
| ENSMUSG00000048424 | Ranbp3l       | 3,412060022  | 0,00023 |
| ENSMUSG00000097084 | Foxl1         | -8,071900368 | 0,00023 |
| ENSMUSG00000020836 | Coro6         | -3,254760027 | 0,00023 |
| ENSMUSG00000026355 | Mcm6          | -1,05084002  | 0,00023 |
| ENSMUSG00000037373 | Ctbp1         | -0,866550028 | 0,00023 |
| ENSMUSG00000069565 | Dazap1        | -0,56400001  | 0,00023 |
| ENSMUSG00000027900 | Dram2         | 0,655399978  | 0,00023 |
| ENSMUSG00000020910 | Adprm         | 0,986020029  | 0,00023 |
| ENSMUSG00000054733 | Msra          | 1,750589967  | 0,00023 |
| ENSMUSG00000048878 | Hexim1        | 0,771149993  | 0,00023 |
| ENSMUSG00000022788 | Fgd4          | 1,101879954  | 0,00023 |
| ENSMUSG00000035637 | Grhpr         | 1,618880033  | 0,00023 |
| ENSMUSG00000058755 | Osm           | -3,683290005 | 0,00024 |
| ENSMUSG00000091243 | Vgll3         | -2,728060007 | 0,00024 |
| ENSMUSG00000041073 | Nacad         | -2,613369942 | 0,00024 |
| ENSMUSG00000057963 | Itpk1         | -1,010699987 | 0,00024 |
| ENSMUSG00000014932 | Yes1          | 0,516260028  | 0,00024 |
| ENSMUSG00000025871 | 4833439L19Rik | 0,53530997   | 0,00024 |
| ENSMUSG00000034574 | Daam1         | 0,973060012  | 0,00024 |
| ENSMUSG00000021185 | Dglucy        | 0,987900019  | 0,00024 |
| ENSMUSG00000078964 | Ces1b         | 2,257339954  | 0,00024 |
| ENSMUSG00000032454 | Rbp2          | -4,722780228 | 0,00024 |
| ENSMUSG00000047044 | D030056L22Rik | -1,203629971 | 0,00024 |
| ENSMUSG00000078495 | Zfp984        | -1,07404995  | 0,00024 |
| ENSMUSG00000034108 | Ccs           | 1,622830033  | 0,00024 |
| ENSMUSG00000028545 | Bend5         | -2,985820055 | 0,00024 |
| ENSMUSG00000008859 | Rala          | -0,967760026 | 0,00024 |
| ENSMUSG00000022339 | Ebag9         | 0,692189991  | 0,00024 |
| ENSMUSG00000029811 | Aoc1          | -4,27507019  | 0,00024 |
| ENSMUSG00000020826 | Nos2          | -3,058449984 | 0,00024 |
| ENSMUSG00000015023 | Ddx19a        | -0,570410013 | 0,00024 |
| ENSMUSG00000030236 | Slco1b2       | 2,124939919  | 0,00024 |
| ENSMUSG00000022871 | Fetub         | 2,196769953  | 0,00024 |
| ENSMUSG00000036570 | Fxyd1         | 2,317300081  | 0,00024 |
| ENSMUSG00000042659 | Arrdc4        | 0,984979987  | 0,00025 |
| ENSMUSG00000029650 | Slc46a3       | 1,767879963  | 0,00025 |
| ENSMUSG00000070473 | Cldn3         | 1,790140033  | 0,00025 |
| ENSMUSG00000025196 | Cpn1          | 1,932479978  | 0,00025 |
| ENSMUSG00000027379 | Bub1          | -2,652369976 | 0,00025 |
| ENSMUSG00000014329 | Bicc1         | -1,981999993 | 0,00025 |
| ENSMUSG00000036943 | Rab8b         | -1,098559976 | 0,00025 |
| ENSMUSG00000036046 | 5031439G07Rik | -0,665260017 | 0,00025 |
| ENSMUSG00000027708 | Dcun1d1       | 0,549179971  | 0,00025 |

|                    |               |              |         |
|--------------------|---------------|--------------|---------|
| ENSMUSG00000074909 | Ranbp6        | 0,597150028  | 0,00025 |
| ENSMUSG00000026991 | Pkp4          | 0,630770028  | 0,00025 |
| ENSMUSG00000032051 | Fdx1          | 1,81953001   | 0,00025 |
| ENSMUSG00000037509 | Arhgef4       | -1,913869977 | 0,00025 |
| ENSMUSG00000029014 | Dnajc2        | -0,756099999 | 0,00025 |
| ENSMUSG00000062376 | Borcs7        | 0,740610003  | 0,00025 |
| ENSMUSG00000046447 | Camk2n1       | 1,119410038  | 0,00025 |
| ENSMUSG00000022095 | Fam160b2      | -0,852900028 | 0,00025 |
| ENSMUSG00000063511 | Snrnp70       | -0,571929991 | 0,00025 |
| ENSMUSG00000032263 | Bckdhb        | 1,522950053  | 0,00025 |
| ENSMUSG00000044103 | Il1f9         | 2,597949982  | 0,00025 |
| ENSMUSG00000056155 | Nanos3        | -5,634200096 | 0,00026 |
| ENSMUSG00000035678 | Tnfsf9        | -3,376620054 | 0,00026 |
| ENSMUSG00000002012 | Pnck          | -3,190540075 | 0,00026 |
| ENSMUSG00000022240 | Ctnnd2        | -2,745630026 | 0,00026 |
| ENSMUSG00000041703 | Zic5          | -5,152669907 | 0,00026 |
| ENSMUSG00000039275 | Foxk2         | -0,86609     | 0,00026 |
| ENSMUSG00000011148 | Adssl1        | -1,159360051 | 0,00026 |
| ENSMUSG00000004936 | Map2k1        | -0,72845     | 0,00026 |
| ENSMUSG00000037236 | Matr3         | -0,485110015 | 0,00026 |
| ENSMUSG00000029513 | Prkab1        | 0,668820024  | 0,00026 |
| ENSMUSG00000039270 | Megf9         | 1,405679941  | 0,00026 |
| ENSMUSG00000015337 | Endog         | 1,920120001  | 0,00026 |
| ENSMUSG00000049555 | Tmie          | 2,128609896  | 0,00026 |
| ENSMUSG00000037852 | Cpe           | -2,014790058 | 0,00026 |
| ENSMUSG00000028634 | Hivep3        | -1,194560051 | 0,00026 |
| ENSMUSG00000021830 | Txndc16       | -1,108989954 | 0,00026 |
| ENSMUSG00000025159 | Mms19         | -0,530700028 | 0,00026 |
| ENSMUSG00000020952 | Scfd1         | 0,679239988  | 0,00026 |
| ENSMUSG00000039349 | C130074G19Rik | 1,641589999  | 0,00026 |
| ENSMUSG00000023176 | Cpn2          | 2,084549904  | 0,00026 |
| ENSMUSG00000030862 | Cpxm2         | -3,117719889 | 0,00027 |
| ENSMUSG00000022498 | Txndc11       | 0,810029984  | 0,00027 |
| ENSMUSG00000056055 | Sag           | -4,560860157 | 0,00027 |
| ENSMUSG00000020186 | Csrp2         | -1,934960008 | 0,00027 |
| ENSMUSG00000027327 | 1700037H04Rik | -1,60608995  | 0,00027 |
| ENSMUSG00000038936 | Sccpdh        | -1,321480036 | 0,00027 |
| ENSMUSG00000035351 | Nup37         | -0,874979973 | 0,00027 |
| ENSMUSG00000027936 | Crtc2         | -0,716669977 | 0,00027 |
| ENSMUSG00000026889 | Rbm18         | -0,644110024 | 0,00027 |
| ENSMUSG00000022814 | Umps          | 0,782440007  | 0,00027 |
| ENSMUSG00000038080 | Kdm1b         | 1,191589952  | 0,00027 |
| ENSMUSG00000018659 | Pnpo          | 1,62390995   | 0,00027 |
| ENSMUSG00000045930 | Clec14a       | 1,690680027  | 0,00027 |
| ENSMUSG00000047146 | Tet1          | -3,569109917 | 0,00027 |
| ENSMUSG00000010154 | Spire2        | -1,959480047 | 0,00027 |
| ENSMUSG00000001802 | Lrp3          | 1,51414001   | 0,00027 |

|                    |          |              |         |
|--------------------|----------|--------------|---------|
| ENSMUSG00000019853 | Hebp2    | -2,177190065 | 0,00027 |
| ENSMUSG00000010048 | Ifrd2    | 1,153890014  | 0,00028 |
| ENSMUSG00000023243 | Kcnk5    | 1,608399987  | 0,00028 |
| ENSMUSG00000038528 | Mfsd4b5  | 3,095969915  | 0,00028 |
| ENSMUSG00000019873 | Reep3    | 0,595049977  | 0,00028 |
| ENSMUSG00000055553 | Kxd1     | 1,218600035  | 0,00028 |
| ENSMUSG00000035181 | Heatr5a  | -1,484509945 | 0,00028 |
| ENSMUSG00000032178 | Ilf3     | -0,984089971 | 0,00028 |
| ENSMUSG00000026854 | Usp20    | -0,768819988 | 0,00028 |
| ENSMUSG00000032336 | Nptn     | -0,639310002 | 0,00028 |
| ENSMUSG00000031935 | Med17    | -0,631959975 | 0,00028 |
| ENSMUSG00000047141 | Zfp654   | 0,673479974  | 0,00028 |
| ENSMUSG00000038539 | Atf5     | 1,527080059  | 0,00028 |
| ENSMUSG00000029699 | Ssc4d    | 1,115800023  | 0,00028 |
| ENSMUSG00000031922 | Cep57    | -0,592109978 | 0,00029 |
| ENSMUSG00000078515 | Ddi2     | 0,994669974  | 0,00029 |
| ENSMUSG00000024785 | Rcl1     | 1,60781002   | 0,00029 |
| ENSMUSG00000014686 | Ceacam16 | -2,790590048 | 0,00029 |
| ENSMUSG00000035293 | G2e3     | -1,555649996 | 0,00029 |
| ENSMUSG00000029580 | Actb     | -1,199120045 | 0,00029 |
| ENSMUSG00000027905 | Ddx20    | -0,671829998 | 0,00029 |
| ENSMUSG00000029798 | Herc6    | 1,407989979  | 0,00029 |
| ENSMUSG00000023070 | Rgn      | 2,024650097  | 0,00029 |
| ENSMUSG00000025481 | Urah     | 2,225029945  | 0,00029 |
| ENSMUSG00000067586 | S1pr3    | 1,378489971  | 0,00029 |
| ENSMUSG00000035373 | Ccl7     | -3,077369928 | 0,00029 |
| ENSMUSG00000033763 | Mtss1l   | -1,392199993 | 0,00029 |
| ENSMUSG00000029859 | Epha1    | 1,746430039  | 0,00029 |
| ENSMUSG00000075701 | Selenos  | 1,152549982  | 0,0003  |
| ENSMUSG00000022270 | Retreg1  | 1,462980032  | 0,0003  |
| ENSMUSG00000040809 | Chil3    | -3,877789974 | 0,0003  |
| ENSMUSG00000049871 | Nlrc3    | -2,224250078 | 0,0003  |
| ENSMUSG00000038816 | Ctnnal1  | -0,878859997 | 0,0003  |
| ENSMUSG00000022248 | Rad1     | -0,74980998  | 0,0003  |
| ENSMUSG00000028709 | Mob3c    | 0,868730009  | 0,0003  |
| ENSMUSG00000024601 | Isoc1    | 1,591009974  | 0,0003  |
| ENSMUSG00000029716 | Tfr2     | 1,758340001  | 0,0003  |
| ENSMUSG00000017868 | Sgk2     | 2,093470097  | 0,0003  |
| ENSMUSG00000026495 | Efcab2   | 1,255660057  | 0,0003  |
| ENSMUSG00000036885 | Arhgef26 | 1,572610021  | 0,0003  |
| ENSMUSG00000004610 | Etfb     | 1,86954999   | 0,0003  |
| ENSMUSG00000056973 | Ces1d    | 2,152019978  | 0,0003  |
| ENSMUSG00000038248 | Sobp     | -4,209169865 | 0,0003  |
| ENSMUSG00000027861 | Casq2    | -3,854360104 | 0,0003  |
| ENSMUSG00000054203 | Ifi205   | -1,966510057 | 0,0003  |
| ENSMUSG00000037622 | Wdtdc1   | 1,100749969  | 0,0003  |
| ENSMUSG00000025746 | Ilf6     | -5,88864994  | 0,00031 |



|                    |          |              |         |
|--------------------|----------|--------------|---------|
| ENSMUSG00000015478 | Rnf5     | 0,639699996  | 0,00031 |
| ENSMUSG00000021097 | Clmn     | 1,579990029  | 0,00031 |
| ENSMUSG00000047638 | Nr1h4    | 1,742030025  | 0,00031 |
| ENSMUSG00000079243 | Xirp1    | 2,135699987  | 0,00031 |
| ENSMUSG00000031167 | Rbm3     | -1,215919971 | 0,00031 |
| ENSMUSG00000061118 | Dnajc30  | 0,81874001   | 0,00031 |
| ENSMUSG00000026208 | Des      | -1,487579942 | 0,00031 |
| ENSMUSG00000004929 | Thop1    | -1,059659958 | 0,00031 |
| ENSMUSG00000031012 | Cask     | -0,865649998 | 0,00031 |
| ENSMUSG00000032496 | Ltf      | -3,969099998 | 0,00031 |
| ENSMUSG00000029765 | Plxna4   | -3,536159992 | 0,00031 |
| ENSMUSG00000046811 | Gltpd2   | 2,274369955  | 0,00031 |
| ENSMUSG00000029851 | Tcaf2    | -1,417129993 | 0,00032 |
| ENSMUSG00000028312 | Smc2     | -1,405709982 | 0,00032 |
| ENSMUSG00000036533 | Cdc42ep3 | -1,215860009 | 0,00032 |
| ENSMUSG00000002870 | Mcm2     | -1,140190005 | 0,00032 |
| ENSMUSG00000019818 | Cd164    | 0,518769979  | 0,00032 |
| ENSMUSG00000059772 | Slx1b    | 0,705739975  | 0,00032 |
| ENSMUSG00000014245 | Pigl     | 0,827470005  | 0,00032 |
| ENSMUSG00000028383 | Hsd12    | 1,037559986  | 0,00032 |
| ENSMUSG00000022574 | Naprt    | 1,731170058  | 0,00032 |
| ENSMUSG00000003585 | Sec14l2  | 1,956509948  | 0,00032 |
| ENSMUSG00000048489 | Depp1    | 2,382339954  | 0,00032 |
| ENSMUSG00000024056 | Ndc80    | -2,004689932 | 0,00032 |
| ENSMUSG00000061758 | Akr1b10  | -1,198909998 | 0,00032 |
| ENSMUSG00000025510 | Cd151    | -0,736039996 | 0,00032 |
| ENSMUSG00000028330 | Ncbp1    | -0,575399995 | 0,00032 |
| ENSMUSG00000034424 | Gcsh     | 1,143270016  | 0,00032 |
| ENSMUSG00000022844 | Pdia5    | 1,363870025  | 0,00032 |
| ENSMUSG00000023341 | Mx2      | 1,494459987  | 0,00032 |
| ENSMUSG00000030340 | Scnn1a   | 1,798099995  | 0,00032 |
| ENSMUSG00000033429 | Mcee     | 1,692880034  | 0,00032 |
| ENSMUSG00000024410 | Rmc1     | -0,998279989 | 0,00033 |
| ENSMUSG00000029199 | Lias     | 0,565800011  | 0,00033 |
| ENSMUSG00000035757 | Selenoo  | 1,456580043  | 0,00033 |
| ENSMUSG00000019737 | Syne4    | 1,60729003   | 0,00033 |
| ENSMUSG00000035184 | Fam124a  | 1,767379999  | 0,00033 |
| ENSMUSG00000062444 | Ap3b2    | -7,698140144 | 0,00033 |
| ENSMUSG00000027996 | Sfrp2    | -5,768400192 | 0,00033 |
| ENSMUSG00000034839 | Larp6    | -5,21104002  | 0,00033 |
| ENSMUSG00000021379 | Id4      | -1,630749941 | 0,00033 |
| ENSMUSG00000056116 | H2-T22   | 1,368049979  | 0,00033 |
| ENSMUSG00000021903 | Galnt15  | 1,628409982  | 0,00033 |
| ENSMUSG00000037600 | Kdf1     | 1,708050013  | 0,00033 |
| ENSMUSG00000030800 | Prss8    | 1,74751997   | 0,00033 |
| ENSMUSG00000018012 | Rac3     | -2,061949968 | 0,00033 |
| ENSMUSG00000041570 | Camsap2  | -1,261250019 | 0,00033 |

|                    |          |              |         |
|--------------------|----------|--------------|---------|
| ENSMUSG00000031403 | Dkc1     | -0,640179992 | 0,00034 |
| ENSMUSG00000003545 | Fosb     | -3,477760077 | 0,00034 |
| ENSMUSG00000079553 | Kifc1    | -1,782629967 | 0,00034 |
| ENSMUSG00000037337 | Map4k1   | -1,182620049 | 0,00034 |
| ENSMUSG00000020100 | Slc29a3  | -0,982190013 | 0,00034 |
| ENSMUSG00000023353 | Agap3    | -0,759370029 | 0,00034 |
| ENSMUSG00000057649 | Brd9     | -0,639569998 | 0,00034 |
| ENSMUSG00000036782 | Klhl13   | 1,39944005   | 0,00034 |
| ENSMUSG00000035504 | Reep6    | 1,892140031  | 0,00034 |
| ENSMUSG00000055561 | Spink5   | 3,07088995   | 0,00034 |
| ENSMUSG00000052854 | Nrk      | -5,823450089 | 0,00034 |
| ENSMUSG00000020681 | Ace      | -2,15399003  | 0,00034 |
| ENSMUSG00000034430 | Zxdc     | -0,970369995 | 0,00034 |
| ENSMUSG00000028180 | Zranb2   | -0,489329994 | 0,00034 |
| ENSMUSG00000032398 | Snpc5    | 1,153540015  | 0,00034 |
| ENSMUSG00000017286 | Glod4    | 0,633639991  | 0,00034 |
| ENSMUSG00000001942 | Siae     | 1,354750037  | 0,00034 |
| ENSMUSG00000043263 | Ifi209   | -1,931499958 | 0,00035 |
| ENSMUSG00000020899 | Pfas     | -1,027449965 | 0,00035 |
| ENSMUSG00000020458 | Rtn4     | -0,96390003  | 0,00035 |
| ENSMUSG00000037134 | Prmt9    | 0,464489996  | 0,00035 |
| ENSMUSG00000000605 | Clcn4    | 0,654600024  | 0,00035 |
| ENSMUSG00000040557 | Mettl27  | 1,175690055  | 0,00035 |
| ENSMUSG00000031775 | Plip     | 1,298730016  | 0,00035 |
| ENSMUSG00000030826 | Bcat2    | 1,51078999   | 0,00035 |
| ENSMUSG00000027939 | Nup210l  | -5,237080097 | 0,00035 |
| ENSMUSG00000041347 | Bdkrb1   | -4,467380047 | 0,00035 |
| ENSMUSG00000097789 | Gm2115   | -3,775540113 | 0,00035 |
| ENSMUSG00000025935 | Tram1    | 0,915639997  | 0,00035 |
| ENSMUSG00000020364 | Zfp354a  | 1,007609963  | 0,00035 |
| ENSMUSG00000026621 | Marc1    | 2,151370049  | 0,00035 |
| ENSMUSG00000034126 | Pomt2    | 0,557150006  | 0,00035 |
| ENSMUSG00000033931 | Rbm34    | -0,463079989 | 0,00035 |
| ENSMUSG00000037872 | Ackr1    | 1,938050032  | 0,00035 |
| ENSMUSG00000070287 | Slc35g2  | -2,031199932 | 0,00036 |
| ENSMUSG00000005566 | Trim28   | -0,750320017 | 0,00036 |
| ENSMUSG00000034867 | Ankrd27  | 0,746200025  | 0,00036 |
| ENSMUSG00000020882 | Cacnb1   | -1,826480031 | 0,00036 |
| ENSMUSG00000027618 | Nfs1     | 0,700699985  | 0,00036 |
| ENSMUSG00000009646 | Pla2g12b | 2,099159956  | 0,00036 |
| ENSMUSG00000021929 | Kpna3    | -0,386720002 | 0,00036 |
| ENSMUSG00000014905 | Dnajb9   | 1,03094995   | 0,00036 |
| ENSMUSG00000079652 | Fam71f2  | -3,522540092 | 0,00036 |
| ENSMUSG00000029389 | Ddx55    | -0,577820003 | 0,00037 |
| ENSMUSG00000022351 | Sqle     | 1,053449988  | 0,00037 |
| ENSMUSG00000030494 | Rhpn2    | 1,489159942  | 0,00037 |
| ENSMUSG00000046031 | Calhm6   | 2,210469961  | 0,00037 |

|                    |          |              |         |
|--------------------|----------|--------------|---------|
| ENSMUSG00000022387 | Brd1     | -0,857550025 | 0,00037 |
| ENSMUSG00000043085 | Tmem82   | 1,255949974  | 0,00037 |
| ENSMUSG00000040007 | Bahd1    | -0,686200023 | 0,00037 |
| ENSMUSG00000029056 | Pank4    | -0,588670015 | 0,00037 |
| ENSMUSG00000025903 | Lypla1   | 1,188339949  | 0,00037 |
| ENSMUSG00000074272 | Ceacam1  | 2,279910088  | 0,00037 |
| ENSMUSG00000034416 | Pkd1l2   | -4,827899933 | 0,00037 |
| ENSMUSG00000036281 | Snapc4   | -0,892809987 | 0,00037 |
| ENSMUSG00000021687 | Scamp1   | 0,694360018  | 0,00037 |
| ENSMUSG00000041058 | Wwp1     | 0,999989986  | 0,00037 |
| ENSMUSG00000051065 | Mb21d2   | 1,217190027  | 0,00037 |
| ENSMUSG00000021187 | Tc2n     | 2,000129938  | 0,00037 |
| ENSMUSG00000020620 | Abca8b   | 2,187669992  | 0,00037 |
| ENSMUSG00000021210 | Akr1c6   | 2,405999899  | 0,00037 |
| ENSMUSG00000026239 | Pde6d    | -0,871630013 | 0,00038 |
| ENSMUSG00000027048 | Abcb11   | 2,285279989  | 0,00038 |
| ENSMUSG00000091971 | Hspa1a   | -2,724910021 | 0,00038 |
| ENSMUSG00000040502 | March9   | -1,833330035 | 0,00038 |
| ENSMUSG00000028403 | Zdhhc21  | -0,678449988 | 0,00038 |
| ENSMUSG00000046722 | Cdc42se1 | -1,011790037 | 0,00038 |
| ENSMUSG00000025358 | Cdk2     | -0,780569971 | 0,00038 |
| ENSMUSG00000009145 | Dqx1     | 1,667369962  | 0,00038 |
| ENSMUSG00000033715 | Akr1c14  | 2,226490021  | 0,00038 |
| ENSMUSG00000057068 | Fam47e   | 2,37541008   | 0,00038 |
| ENSMUSG00000047344 | Lancl3   | -6,373250008 | 0,00038 |
| ENSMUSG00000041360 | Pum3     | -0,684700012 | 0,00039 |
| ENSMUSG00000006611 | Hfe      | 1,26639998   | 0,00039 |
| ENSMUSG00000009097 | Tbx1     | -4,200520039 | 0,00039 |
| ENSMUSG00000025912 | Mybl1    | -1,924970031 | 0,00039 |
| ENSMUSG00000074254 | Cyp2a4   | 3,653729916  | 0,00039 |
| ENSMUSG00000057541 | Pus7     | -1,478010058 | 0,00039 |
| ENSMUSG00000010796 | Asz1     | -2,923019886 | 0,00039 |
| ENSMUSG00000054422 | Fabp1    | 2,544120073  | 0,00039 |
| ENSMUSG00000027649 | Ctnnb1   | -0,556249976 | 0,0004  |
| ENSMUSG00000071722 | Spin4    | -1,720919967 | 0,0004  |
| ENSMUSG00000026271 | Gpr35    | -1,685269952 | 0,0004  |
| ENSMUSG00000044149 | Nkrf     | -0,611509979 | 0,0004  |
| ENSMUSG00000035671 | Zswim4   | -1,285599947 | 0,0004  |
| ENSMUSG00000040818 | Dennd6a  | 0,655229986  | 0,0004  |
| ENSMUSG00000020651 | Slc26a4  | 2,950429916  | 0,0004  |
| ENSMUSG00000042250 | Pglyrp4  | -3,615020037 | 0,00041 |
| ENSMUSG00000038020 | Rapgef1  | -2,76583004  | 0,00041 |
| ENSMUSG00000028010 | Gar1     | -1,195070028 | 0,00041 |
| ENSMUSG00000021703 | Serinc5  | 0,67543      | 0,00041 |
| ENSMUSG00000037022 | Mmaa     | 1,068230033  | 0,00041 |
| ENSMUSG00000030935 | Acsm3    | 2,20423007   | 0,00041 |
| ENSMUSG00000032271 | Nnmt     | 2,67069006   | 0,00041 |

|                    |          |              |         |
|--------------------|----------|--------------|---------|
| ENSMUSG00000037224 | Zfyve28  | -3,172879934 | 0,00041 |
| ENSMUSG00000005447 | Pafah1b3 | -1,626350045 | 0,00041 |
| ENSMUSG00000040268 | Plekha1  | -1,012199998 | 0,00041 |
| ENSMUSG00000048799 | Cep120   | -0,86638999  | 0,00041 |
| ENSMUSG00000046417 | Lrrc75a  | -2,021209955 | 0,00041 |
| ENSMUSG00000024735 | Prpf19   | 0,493699998  | 0,00041 |
| ENSMUSG00000055963 | Triqk    | -3,354769945 | 0,00042 |
| ENSMUSG0000006651  | Aplp1    | -2,264820099 | 0,00042 |
| ENSMUSG00000027712 | Anxa5    | -1,247370005 | 0,00042 |
| ENSMUSG00000031805 | Jak3     | -0,824819982 | 0,00042 |
| ENSMUSG00000018379 | Srsf1    | -0,44806999  | 0,00042 |
| ENSMUSG00000023930 | Crisp2   | 3,384459972  | 0,00042 |
| ENSMUSG00000050370 | Ch25h    | -3,694149971 | 0,00042 |
| ENSMUSG00000038530 | Rgs4     | -2,126230001 | 0,00042 |
| ENSMUSG00000038349 | Plcl1    | -2,115159988 | 0,00042 |
| ENSMUSG00000050555 | Hyls1    | -1,13222003  | 0,00042 |
| ENSMUSG00000032519 | Slc25a38 | 0,726740003  | 0,00042 |
| ENSMUSG00000064368 | mt-Nd6   | 1,189880013  | 0,00042 |
| ENSMUSG00000020778 | Ten1     | -1,761150002 | 0,00042 |
| ENSMUSG00000026027 | Stradb   | 0,963119984  | 0,00042 |
| ENSMUSG00000030954 | Gp2      | -5,583280087 | 0,00042 |
| ENSMUSG00000071533 | Pcnp     | 0,309789985  | 0,00042 |
| ENSMUSG00000036098 | Myrf     | 1,467499971  | 0,00042 |
| ENSMUSG00000041044 | Lrit1    | 2,500780106  | 0,00042 |
| ENSMUSG00000024411 | Aqp4     | 3,11729002   | 0,00042 |
| ENSMUSG00000049723 | Mmp12    | -2,178649902 | 0,00043 |
| ENSMUSG00000007833 | Aldh16a1 | 1,310610056  | 0,00043 |
| ENSMUSG00000026639 | Lamb3    | -1,46728003  | 0,00043 |
| ENSMUSG00000056459 | Zbtb25   | -0,977460027 | 0,00043 |
| ENSMUSG00000004768 | Rab23    | 1,182369947  | 0,00043 |
| ENSMUSG00000030406 | Gipr     | -7,740620136 | 0,00043 |
| ENSMUSG00000037469 | Acp7     | -4,163740158 | 0,00043 |
| ENSMUSG00000033902 | Mapkbp1  | -1,401690006 | 0,00043 |
| ENSMUSG00000018322 | Tomm34   | -1,024180055 | 0,00043 |
| ENSMUSG00000031568 | Rwdd4a   | -0,571529984 | 0,00043 |
| ENSMUSG00000038540 | Tmc3     | 1,912119985  | 0,00043 |
| ENSMUSG00000022667 | Cd200r1  | -1,514459968 | 0,00044 |
| ENSMUSG00000054717 | Hmgb2    | -1,471779943 | 0,00044 |
| ENSMUSG00000026843 | Fubp3    | -0,719649971 | 0,00044 |
| ENSMUSG00000025199 | Chuk     | 0,795979977  | 0,00044 |
| ENSMUSG00000052632 | Asap2    | -2,525069952 | 0,00044 |
| ENSMUSG00000046111 | Cep295   | -1,121819973 | 0,00044 |
| ENSMUSG00000001632 | Brpf1    | -1,035079956 | 0,00044 |
| ENSMUSG00000028641 | P3h1     | -0,589190006 | 0,00044 |
| ENSMUSG00000026202 | Tuba4a   | 1,470370054  | 0,00044 |
| ENSMUSG00000024065 | Ehd3     | 1,82249999   | 0,00044 |
| ENSMUSG00000071379 | Hpcal1   | -1,122760057 | 0,00044 |

|                    |               |              |         |
|--------------------|---------------|--------------|---------|
| ENSMUSG00000023832 | Acat2         | 1,183419943  | 0,00045 |
| ENSMUSG00000074785 | Plxnc1        | 1,688699961  | 0,00045 |
| ENSMUSG00000071855 | Ccdc112       | -2,078399897 | 0,00045 |
| ENSMUSG00000002871 | Tpra1         | 0,572629988  | 0,00045 |
| ENSMUSG00000032050 | Rdx           | 1,140269995  | 0,00045 |
| ENSMUSG00000040963 | Asgr2         | 2,121870041  | 0,00045 |
| ENSMUSG00000005681 | Apoa2         | 2,324660063  | 0,00045 |
| ENSMUSG00000049800 | Sertad2       | -0,885240018 | 0,00045 |
| ENSMUSG00000061718 | Ppp1r1b       | 2,469820023  | 0,00045 |
| ENSMUSG00000056531 | Ccdc18        | -1,998499999 | 0,00045 |
| ENSMUSG00000079057 | Cyp4v3        | 1,704939961  | 0,00045 |
| ENSMUSG00000033278 | Ptprm         | -1,437780023 | 0,00046 |
| ENSMUSG00000027774 | Gfm1          | 0,696669996  | 0,00046 |
| ENSMUSG00000028293 | Slc35a1       | 0,708230019  | 0,00046 |
| ENSMUSG00000051220 | Ercc6l        | -1,589100003 | 0,00046 |
| ENSMUSG00000030701 | Plekhh1       | 1,370159984  | 0,00046 |
| ENSMUSG00000028949 | Smarcd3       | -1,76098001  | 0,00046 |
| ENSMUSG00000054115 | Skp2          | -1,391700029 | 0,00046 |
| ENSMUSG00000048485 | Zbtb8b        | -3,398390055 | 0,00047 |
| ENSMUSG00000026526 | Fh1           | 1,393509984  | 0,00047 |
| ENSMUSG00000042988 | Notum         | 1,909649968  | 0,00047 |
| ENSMUSG00000032908 | Sgpp2         | -3,574739933 | 0,00047 |
| ENSMUSG00000039671 | Zmynd8        | -0,896589994 | 0,00047 |
| ENSMUSG00000032187 | Smarca4       | -0,900870025 | 0,00047 |
| ENSMUSG00000025377 | Tepsin        | -0,618309975 | 0,00047 |
| ENSMUSG00000021209 | Ppp4r4        | 1,91940999   | 0,00047 |
| ENSMUSG00000038224 | Serpinf2      | 2,146130085  | 0,00048 |
| ENSMUSG00000023015 | Racgap1       | -1,828770041 | 0,00048 |
| ENSMUSG00000037904 | Ankrd9        | -1,75285995  | 0,00048 |
| ENSMUSG00000059323 | Tonsl         | -1,184999943 | 0,00048 |
| ENSMUSG00000032782 | Cntrob        | -0,91170001  | 0,00048 |
| ENSMUSG00000049653 | Spatc1        | 1,932510018  | 0,00048 |
| ENSMUSG00000023004 | Tuba1b        | -1,271639943 | 0,00048 |
| ENSMUSG00000069808 | Fam57a        | -1,247539997 | 0,00048 |
| ENSMUSG00000028712 | Cyp4a31       | 2,473380089  | 0,00048 |
| ENSMUSG00000020235 | Fzr1          | -0,742129982 | 0,00048 |
| ENSMUSG00000001786 | Fbxo7         | 0,962830007  | 0,00048 |
| ENSMUSG00000042750 | Bex2          | 2,728970051  | 0,00048 |
| ENSMUSG00000027811 | 4930579G24Rik | -1,582299948 | 0,00049 |
| ENSMUSG00000059791 | Nrm           | -1,120830059 | 0,00049 |
| ENSMUSG00000038150 | Ormdl3        | 0,746999979  | 0,00049 |
| ENSMUSG00000050890 | Pdik1l        | 0,88132      | 0,00049 |
| ENSMUSG00000017639 | Rab11fip4     | 1,873250008  | 0,00049 |
| ENSMUSG00000066798 | Zbtb6         | -0,584230006 | 0,00049 |
| ENSMUSG00000037787 | Apopt1        | 1,016450047  | 0,00049 |
| ENSMUSG00000027371 | Fahd2a        | 1,341220021  | 0,00049 |
| ENSMUSG00000001313 | Rnd2          | 1,481520057  | 0,00049 |

|                    |               |              |         |
|--------------------|---------------|--------------|---------|
| ENSMUSG00000009575 | Cbx5          | -0,895070016 | 0,00049 |
| ENSMUSG00000022889 | Mrpl39        | 0,51779002   | 0,00049 |
| ENSMUSG00000034118 | Tpst1         | 1,036339998  | 0,00049 |
| ENSMUSG00000031951 | Tmem231       | -2,789720058 | 0,00049 |
| ENSMUSG00000026240 | Cops7b        | -0,419030011 | 0,00049 |
| ENSMUSG00000040669 | Phc1          | -1,426370025 | 0,0005  |
| ENSMUSG00000037797 | Adh4          | 2,170680046  | 0,0005  |
| ENSMUSG00000029059 | Fam213b       | 1,729969978  | 0,0005  |
| ENSMUSG00000018572 | Phf23         | -1,069059968 | 0,0005  |
| ENSMUSG00000062380 | Tubb3         | -2,703680038 | 0,0005  |
| ENSMUSG00000052889 | Prkcb         | -1,220110059 | 0,0005  |
| ENSMUSG00000034601 | 2700049A03Rik | -1,17031002  | 0,0005  |
| ENSMUSG00000027540 | Ptpn1         | -0,734120011 | 0,0005  |
| ENSMUSG00000007029 | Vars          | -0,636219978 | 0,0005  |
| ENSMUSG00000022110 | Sucla2        | 0,932770014  | 0,0005  |
| ENSMUSG00000009566 | Fpgs          | 1,112419963  | 0,0005  |
| ENSMUSG00000048856 | Slc25a47      | 1,842759967  | 0,0005  |
| ENSMUSG00000022181 | C6            | 1,974740028  | 0,0005  |
| ENSMUSG00000040828 | Catsperd      | 1,80230999   | 0,00051 |
| ENSMUSG00000034457 | Eda2r         | -1,82573998  | 0,00051 |
| ENSMUSG00000030061 | Uba3          | -0,465000004 | 0,00051 |
| ENSMUSG00000067279 | Ppp1r3c       | 2,429090023  | 0,00051 |
| ENSMUSG00000026674 | Ddr2          | -1,27342999  | 0,00051 |
| ENSMUSG00000037103 | Dcaf15        | -1,08465004  | 0,00051 |
| ENSMUSG00000028076 | Cd1d1         | 1,59612      | 0,00051 |
| ENSMUSG00000021876 | Rnase4        | 1,613160014  | 0,00051 |
| ENSMUSG00000026669 | Mcm10         | 1,840540051  | 0,00051 |
| ENSMUSG00000014782 | Plekhg4       | -5,888050079 | 0,00052 |
| ENSMUSG00000036466 | Megf11        | -2,12161994  | 0,00052 |
| ENSMUSG00000085793 | Lin52         | 0,643230021  | 0,00052 |
| ENSMUSG00000021786 | Oxsm          | 1,266559958  | 0,00052 |
| ENSMUSG00000007035 | Msh5          | -1,717219949 | 0,00052 |
| ENSMUSG00000036339 | Tmem260       | 0,889370024  | 0,00052 |
| ENSMUSG00000028607 | Cpt2          | 1,235520005  | 0,00052 |
| ENSMUSG00000023094 | Msrb2         | 1,368630052  | 0,00052 |
| ENSMUSG00000030762 | Aqp8          | 1,993139982  | 0,00052 |
| ENSMUSG00000023000 | Dhh           | -2,843770027 | 0,00053 |
| ENSMUSG00000026546 | Cfap45        | -2,521359921 | 0,00053 |
| ENSMUSG00000028291 | Akirin2       | -0,671239972 | 0,00053 |
| ENSMUSG00000021264 | Yy1           | -0,58069998  | 0,00053 |
| ENSMUSG00000046598 | Bdh1          | 2,08585      | 0,00053 |
| ENSMUSG00000071226 | Cecr2         | 2,251790047  | 0,00053 |
| ENSMUSG00000031189 | Aff2          | -7,75770998  | 0,00053 |
| ENSMUSG00000041552 | Ptchd1        | -6,022510052 | 0,00053 |
| ENSMUSG00000032968 | Inha          | -4,39343977  | 0,00053 |
| ENSMUSG00000021270 | Hsp90aa1      | -1,224949956 | 0,00053 |
| ENSMUSG00000037013 | Ss18          | -0,636520028 | 0,00053 |

|                    |         |              |         |
|--------------------|---------|--------------|---------|
| ENSMUSG00000028914 | Casp9   | 0,727869987  | 0,00053 |
| ENSMUSG00000026176 | Ctdsp1  | 0,902220011  | 0,00053 |
| ENSMUSG00000055421 | Pcdh9   | -5,522630215 | 0,00053 |
| ENSMUSG00000020904 | Cfap52  | -2,83246994  | 0,00053 |
| ENSMUSG00000063873 | Slc24a3 | -2,375109911 | 0,00053 |
| ENSMUSG00000003847 | Nfat5   | -1,721359968 | 0,00054 |
| ENSMUSG00000029387 | Gtf2h3  | 0,480960011  | 0,00054 |
| ENSMUSG00000038298 | Pdzk1   | 2,148139954  | 0,00054 |
| ENSMUSG00000033039 | Micall1 | -1,746979952 | 0,00054 |
| ENSMUSG00000058440 | Nrf1    | -0,60115999  | 0,00054 |
| ENSMUSG00000029103 | Lrpap1  | 0,391990006  | 0,00054 |
| ENSMUSG00000079563 | Pglyrp2 | 1,934249997  | 0,00054 |
| ENSMUSG00000045136 | Tubb2b  | -2,275779963 | 0,00054 |
| ENSMUSG00000032815 | Fanca   | -1,884430051 | 0,00055 |
| ENSMUSG00000022771 | Ppil2   | 0,361380011  | 0,00055 |
| ENSMUSG00000029073 | Ctp     | 0,571519971  | 0,00055 |
| ENSMUSG00000033809 | Alg3    | 0,768710017  | 0,00055 |
| ENSMUSG00000028684 | Urod    | 1,249680042  | 0,00055 |
| ENSMUSG00000034738 | Nostrin | 1,297119975  | 0,00055 |
| ENSMUSG00000013275 | Slc41a1 | -1,524099946 | 0,00055 |
| ENSMUSG00000001627 | Ifrd1   | -1,298529983 | 0,00055 |
| ENSMUSG00000047648 | Fbxo30  | -0,887090027 | 0,00055 |
| ENSMUSG00000025145 | Lrrc45  | -0,736769974 | 0,00055 |
| ENSMUSG00000030990 | Pgap2   | 0,64477998   | 0,00055 |
| ENSMUSG00000027993 | Trim2   | 1,373010039  | 0,00055 |
| ENSMUSG00000017688 | Hnf4g   | 2,605750084  | 0,00055 |
| ENSMUSG00000035109 | Shc4    | -2,850029945 | 0,00055 |
| ENSMUSG00000020740 | Gga3    | -1,070459962 | 0,00055 |
| ENSMUSG00000027963 | Extl2   | -0,422619998 | 0,00055 |
| ENSMUSG00000038793 | Lefty1  | -2,090600014 | 0,00055 |
| ENSMUSG00000020973 | Dnaaf2  | -1,149260044 | 0,00055 |
| ENSMUSG00000027746 | Ufm1    | 0,61917001   | 0,00055 |
| ENSMUSG00000029319 | Coq2    | 0,916939974  | 0,00055 |
| ENSMUSG00000062074 | Wisp3   | 2,695610046  | 0,00055 |
| ENSMUSG00000028862 | Map3k6  | -2,229720116 | 0,00056 |
| ENSMUSG00000049504 | Proser1 | -1,06348002  | 0,00056 |
| ENSMUSG00000029596 | Sdsl    | 2,034919977  | 0,00056 |
| ENSMUSG00000036106 | Prr5    | -0,886160016 | 0,00056 |
| ENSMUSG00000035142 | Nubpl   | 1,253530025  | 0,00056 |
| ENSMUSG00000023903 | Mmp25   | -5,312779903 | 0,00056 |
| ENSMUSG00000023972 | Ptk7    | -1,903710008 | 0,00056 |
| ENSMUSG00000063253 | Scoc    | -0,826730013 | 0,00056 |
| ENSMUSG00000029610 | Aimp2   | -0,739239991 | 0,00056 |
| ENSMUSG00000015189 | Casd1   | 0,530040026  | 0,00056 |
| ENSMUSG00000026207 | Speg    | -1,692000031 | 0,00056 |
| ENSMUSG00000038092 | Hsd3b5  | 3,225680113  | 0,00056 |
| ENSMUSG00000068264 | Ap5s1   | 1,174299955  | 0,00057 |



|                    |                |              |         |
|--------------------|----------------|--------------|---------|
| ENSMUSG00000041431 | Ccnb1          | -1,939990044 | 0,00057 |
| ENSMUSG00000025821 | Zfp282         | -0,874819994 | 0,00057 |
| ENSMUSG00000030302 | Atp2b2         | 2,510839939  | 0,00057 |
| ENSMUSG00000020037 | Rfx4           | 2,561419964  | 0,00057 |
| ENSMUSG00000032221 | Mns1           | -2,201910019 | 0,00057 |
| ENSMUSG00000028156 | Eif4e          | -0,450309992 | 0,00057 |
| ENSMUSG00000039960 | Rhou           | 0,724120021  | 0,00057 |
| ENSMUSG00000081534 | Slc48a1        | 1,018360019  | 0,00057 |
| ENSMUSG00000047866 | Lonp2          | 1,297140002  | 0,00057 |
| ENSMUSG00000002475 | Abhd3          | 1,802440047  | 0,00057 |
| ENSMUSG00000018486 | Wnt9b          | 2,335580111  | 0,00057 |
| ENSMUSG00000028933 | Xrcc2          | -1,061910033 | 0,00058 |
| ENSMUSG00000025937 | Lactb2         | 1,453160048  | 0,00058 |
| ENSMUSG00000024391 | Apom           | 2,500200033  | 0,00058 |
| ENSMUSG00000037940 | Inpp4b         | -3,304879904 | 0,00058 |
| ENSMUSG00000022105 | Rb1            | -0,701219976 | 0,00058 |
| ENSMUSG00000042812 | Foxf1          | -1,574699998 | 0,00059 |
| ENSMUSG00000024875 | Yif1a          | 0,718410015  | 0,00059 |
| ENSMUSG00000027208 | Fgf7           | -6,752349854 | 0,00059 |
| ENSMUSG00000033595 | Lgi3           | -3,248189926 | 0,00059 |
| ENSMUSG00000050373 | Snx21          | -1,041129947 | 0,00059 |
| ENSMUSG00000058546 | Rpl23a         | -0,695999998 | 0,00059 |
| ENSMUSG00000036223 | Ska1           | -2,333470106 | 0,00059 |
| ENSMUSG00000027932 | Slc27a3        | -1,632369995 | 0,00059 |
| ENSMUSG00000029328 | Hnrnpdl        | -0,612730026 | 0,00059 |
| ENSMUSG00000039530 | Tusc3          | -1,177440047 | 0,0006  |
| ENSMUSG00000028854 | Slc9a1         | -1,014870048 | 0,0006  |
| ENSMUSG00000073725 | Lmbrd1         | 0,78162998   | 0,0006  |
| ENSMUSG00000008690 | Ncaph2         | -0,525449991 | 0,0006  |
| ENSMUSG00000019368 | Sec14l4        | 2,254729986  | 0,0006  |
| ENSMUSG00000094103 | 1700047117Rik2 | -3,128489971 | 0,0006  |
| ENSMUSG00000067370 | B3galt4        | -1,523010015 | 0,0006  |
| ENSMUSG00000069743 | Zfp820         | -0,971099973 | 0,0006  |
| ENSMUSG00000042369 | Rbm45          | -0,536199987 | 0,0006  |
| ENSMUSG00000006958 | Chrd           | 1,249199986  | 0,0006  |
| ENSMUSG00000022149 | C9             | 2,109339952  | 0,0006  |
| ENSMUSG00000003282 | Plag1          | -6,187590122 | 0,00061 |
| ENSMUSG00000044250 | Pced1b         | -1,24732995  | 0,00061 |
| ENSMUSG00000029338 | Antxr2         | -0,90030998  | 0,00061 |
| ENSMUSG00000029684 | Wasl           | 0,573939979  | 0,00061 |
| ENSMUSG00000071369 | Map3k5         | 0,85345      | 0,00061 |
| ENSMUSG00000038253 | Hoxa5          | -1,913419962 | 0,00061 |
| ENSMUSG00000028163 | Nfkb1          | -0,706260026 | 0,00061 |
| ENSMUSG00000038055 | Dexi           | 0,993560016  | 0,00061 |
| ENSMUSG00000033735 | Spr            | 1,511719942  | 0,00061 |
| ENSMUSG00000055653 | Gpc3           | 2,506710052  | 0,00061 |
| ENSMUSG00000032965 | Ift57          | -1,742789984 | 0,00062 |

|                    |          |              |         |
|--------------------|----------|--------------|---------|
| ENSMUSG00000028018 | Gstcd    | -1,173560023 | 0,00062 |
| ENSMUSG00000032386 | Trip4    | 0,775829971  | 0,00062 |
| ENSMUSG00000039795 | Zfand1   | 0,810790002  | 0,00062 |
| ENSMUSG00000026922 | Agpat2   | 1,260040045  | 0,00062 |
| ENSMUSG00000035283 | Adrb1    | 1,453189969  | 0,00062 |
| ENSMUSG00000042918 | Mamstr   | -2,605859995 | 0,00062 |
| ENSMUSG00000045382 | Cxcr4    | -1,493239999 | 0,00062 |
| ENSMUSG00000074825 | Itpripl1 | -0,719659984 | 0,00062 |
| ENSMUSG00000028713 | Cyp4b1   | 1,974939942  | 0,00062 |
| ENSMUSG00000040543 | Pitpnm3  | -3,512639999 | 0,00062 |
| ENSMUSG00000025347 | Mettl7b  | 2,110090017  | 0,00062 |
| ENSMUSG00000051906 | Cd209f   | 4,908070087  | 0,00062 |
| ENSMUSG00000000197 | Nalcn    | -8,710590363 | 0,00063 |
| ENSMUSG00000022096 | Hr       | -2,354310036 | 0,00063 |
| ENSMUSG00000032737 | Inppl1   | -0,895340025 | 0,00063 |
| ENSMUSG00000028454 | Pigo     | 0,695900023  | 0,00063 |
| ENSMUSG00000028412 | Slc44a1  | 0,800660014  | 0,00063 |
| ENSMUSG00000030225 | Dera     | 0,926180005  | 0,00063 |
| ENSMUSG00000024799 | Tm7sf2   | 1,66711998   | 0,00063 |
| ENSMUSG00000027210 | Meis2    | -1,239439964 | 0,00063 |
| ENSMUSG00000030271 | Ogg1     | -0,83871001  | 0,00063 |
| ENSMUSG00000062054 | Iah1     | 1,587960005  | 0,00063 |
| ENSMUSG00000058022 | Adtrp    | 1,981209993  | 0,00063 |
| ENSMUSG00000024827 | Gldc     | 2,151410103  | 0,00063 |
| ENSMUSG00000027333 | Smox     | -1,202290058 | 0,00063 |
| ENSMUSG00000021765 | Fst      | 1,702900052  | 0,00063 |
| ENSMUSG00000070348 | Ccnd1    | -2,183880091 | 0,00064 |
| ENSMUSG00000025408 | Ddit3    | -1,050860047 | 0,00064 |
| ENSMUSG00000041293 | Adgrf1   | 2,377180099  | 0,00064 |
| ENSMUSG00000014773 | Dll1     | -1,061570048 | 0,00065 |
| ENSMUSG00000021965 | Ska3     | -2,056580067 | 0,00065 |
| ENSMUSG00000050605 | Zfp61    | -1,556869984 | 0,00065 |
| ENSMUSG00000055436 | Srsf11   | -0,870519996 | 0,00065 |
| ENSMUSG00000020609 | Apob     | 2,082700014  | 0,00065 |
| ENSMUSG00000047342 | Zfp286   | -3,994509935 | 0,00065 |
| ENSMUSG00000019326 | Aoc3     | -3,884360075 | 0,00065 |
| ENSMUSG00000063317 | Usp31    | -1,138880014 | 0,00065 |
| ENSMUSG00000020701 | Tmem132e | 1,470190048  | 0,00065 |
| ENSMUSG00000008153 | Clstn3   | 2,107019901  | 0,00065 |
| ENSMUSG00000039987 | Phtf2    | -0,811749995 | 0,00065 |
| ENSMUSG00000038462 | Uqcrfs1  | 1,16700995   | 0,00066 |
| ENSMUSG00000024997 | Prdx3    | 1,174000025  | 0,00066 |
| ENSMUSG00000032946 | Rasgrp2  | 1,954130054  | 0,00066 |
| ENSMUSG00000038775 | Vill     | -1,410390019 | 0,00066 |
| ENSMUSG00000043943 | Naalad2  | -1,355909944 | 0,00066 |
| ENSMUSG00000032744 | Heyl     | -2,058480024 | 0,00066 |
| ENSMUSG00000022568 | Scrib    | -0,67651999  | 0,00066 |

|                    |          |              |         |
|--------------------|----------|--------------|---------|
| ENSMUSG00000025134 | Alyref   | -1,193609953 | 0,00066 |
| ENSMUSG00000061559 | Wdr61    | 0,687619984  | 0,00066 |
| ENSMUSG00000016481 | Cr1l     | 0,822809994  | 0,00067 |
| ENSMUSG00000094156 | Sult2a7  | 2,443099976  | 0,00067 |
| ENSMUSG00000021266 | Wars     | -0,619570017 | 0,00067 |
| ENSMUSG00000018820 | Zfyve27  | -0,733990014 | 0,00067 |
| ENSMUSG00000046909 | Tefm     | 0,770219982  | 0,00067 |
| ENSMUSG00000004843 | Chmp2b   | 0,868089974  | 0,00067 |
| ENSMUSG00000028654 | Mycl     | 1,423089981  | 0,00067 |
| ENSMUSG00000070469 | Adamtsl3 | -2,79185009  | 0,00068 |
| ENSMUSG00000036698 | Ago2     | -1,484920025 | 0,00068 |
| ENSMUSG00000026274 | Pask     | -1,671190023 | 0,00068 |
| ENSMUSG00000034333 | Zbed4    | -0,965759993 | 0,00068 |
| ENSMUSG00000057363 | Uxs1     | -0,768239975 | 0,00068 |
| ENSMUSG00000044364 | Tmem74b  | -4,470950127 | 0,00068 |
| ENSMUSG00000060962 | Dmkn     | -4,250020027 | 0,00068 |
| ENSMUSG00000023018 | Smarcd1  | -1,231719971 | 0,00068 |
| ENSMUSG00000024425 | Ndfip1   | -1,00593996  | 0,00068 |
| ENSMUSG00000028359 | Orm3     | 2,62658      | 0,00068 |
| ENSMUSG00000092680 | Snord55  | -2,1426301   | 0,00069 |
| ENSMUSG00000018470 | Kcnab3   | -1,729820013 | 0,00069 |
| ENSMUSG00000053617 | Sh3pxd2a | -1,565369964 | 0,00069 |
| ENSMUSG00000026429 | Ube2t    | -1,681030035 | 0,00069 |
| ENSMUSG00000029528 | Pxn      | -0,988059998 | 0,00069 |
| ENSMUSG00000030612 | Mrpl46   | 1,035069942  | 0,00069 |
| ENSMUSG00000066026 | Dhrs3    | 0,968110025  | 0,0007  |
| ENSMUSG00000030674 | Qprt     | 1,881270051  | 0,0007  |
| ENSMUSG00000079597 | Gm5483   | -6,530769825 | 0,0007  |
| ENSMUSG00000040424 | Hipk4    | -5,864290237 | 0,0007  |
| ENSMUSG00000031309 | Rps6ka3  | -1,092679977 | 0,0007  |
| ENSMUSG00000028621 | Cyb5rl   | 0,846620023  | 0,0007  |
| ENSMUSG00000046432 | Bex3     | -1,822630048 | 0,0007  |
| ENSMUSG00000044792 | Isca1    | 0,689599991  | 0,0007  |
| ENSMUSG00000026172 | Bcs1l    | 0,803650022  | 0,0007  |
| ENSMUSG00000007867 | Ift43    | -1,509060025 | 0,00071 |
| ENSMUSG00000040749 | Siah1b   | -0,986899972 | 0,00071 |
| ENSMUSG00000071180 | Smim15   | -0,751439989 | 0,00071 |
| ENSMUSG00000025609 | Mkln1    | 0,382550001  | 0,00071 |
| ENSMUSG00000022538 | Lsg1     | 0,412530005  | 0,00071 |
| ENSMUSG00000034473 | Sec22a   | 0,88756001   | 0,00071 |
| ENSMUSG00000046861 | Hectd3   | 0,941160023  | 0,00071 |
| ENSMUSG00000009292 | Trpm2    | 1,235550046  | 0,00071 |
| ENSMUSG00000024941 | Scyl1    | -0,248370007 | 0,00071 |
| ENSMUSG00000091867 | Cyp2a22  | 2,375060081  | 0,00071 |
| ENSMUSG00000027679 | Dnajc19  | 1,407420039  | 0,00072 |
| ENSMUSG00000059327 | Eda      | -1,277140021 | 0,00072 |
| ENSMUSG00000046791 | Riox1    | -0,852460027 | 0,00072 |

|                    |         |              |         |
|--------------------|---------|--------------|---------|
| ENSMUSG00000047030 | Spata2  | -0,595560014 | 0,00072 |
| ENSMUSG00000094483 | Purb    | -0,525390029 | 0,00072 |
| ENSMUSG00000037410 | Tbc1d2b | 1,292770028  | 0,00072 |
| ENSMUSG00000039438 | Ttc36   | 2,540149927  | 0,00072 |
| ENSMUSG00000073856 | lqck    | -3,162450075 | 0,00073 |
| ENSMUSG00000025405 | Inhbc   | 2,082940102  | 0,00073 |
| ENSMUSG00000022034 | Esco2   | -2,361510038 | 0,00073 |
| ENSMUSG00000048668 | Rhno1   | -1,020660043 | 0,00073 |
| ENSMUSG00000025340 | Rabgef1 | -0,647010028 | 0,00073 |
| ENSMUSG00000040918 | Slc19a2 | 0,973839998  | 0,00073 |
| ENSMUSG00000021258 | Ccnk    | -0,473320007 | 0,00073 |
| ENSMUSG00000027589 | Pcmt2   | 0,594980001  | 0,00073 |
| ENSMUSG00000034311 | Kif4    | -1,634230018 | 0,00074 |
| ENSMUSG00000022255 | Mtdh    | -1,154399991 | 0,00074 |
| ENSMUSG00000020698 | Cct6b   | 1,874670029  | 0,00074 |
| ENSMUSG00000033460 | Armcx1  | -1,22258997  | 0,00074 |
| ENSMUSG00000036862 | Dchs1   | -1,053429961 | 0,00074 |
| ENSMUSG00000043059 | Zfp513  | -0,70472002  | 0,00074 |
| ENSMUSG00000060904 | Arl1    | 0,506340027  | 0,00074 |
| ENSMUSG00000031349 | Nsdhl   | 1,234680057  | 0,00074 |
| ENSMUSG00000025731 | Mettl26 | 1,692499995  | 0,00074 |
| ENSMUSG00000001021 | S100a3  | -6,311170101 | 0,00074 |
| ENSMUSG00000008226 | Scrn3   | 1,174769998  | 0,00074 |
| ENSMUSG00000029641 | Rasl11a | -2,30005002  | 0,00075 |
| ENSMUSG00000070476 | Fam217b | -1,442890048 | 0,00075 |
| ENSMUSG00000020817 | Rabep1  | 0,667020023  | 0,00075 |
| ENSMUSG00000015224 | Cyp2j9  | 1,477910042  | 0,00075 |
| ENSMUSG00000098470 | C1rb    | 2,62300992   | 0,00075 |
| ENSMUSG00000022286 | Grhl2   | -2,855249882 | 0,00075 |
| ENSMUSG00000024500 | Ppp2r2b | -2,563220024 | 0,00076 |
| ENSMUSG00000022120 | Rnf219  | -1,136340022 | 0,00076 |
| ENSMUSG00000046897 | Zfp740  | -1,07119     | 0,00076 |
| ENSMUSG00000036743 | Psma8   | 1,613710046  | 0,00076 |
| ENSMUSG00000035031 | C8a     | 2,139889956  | 0,00076 |
| ENSMUSG00000000318 | Clec10a | -2,313250065 | 0,00076 |
| ENSMUSG00000028664 | Ephb2   | -2,07772994  | 0,00076 |
| ENSMUSG00000020009 | Ifngr1  | 0,753889978  | 0,00076 |
| ENSMUSG00000037541 | Shank2  | 1,944120049  | 0,00076 |
| ENSMUSG00000032480 | Dhx30   | -0,452459991 | 0,00077 |
| ENSMUSG00000053436 | Mapk14  | 0,635969996  | 0,00077 |
| ENSMUSG00000027332 | lvd     | 0,971279979  | 0,00077 |
| ENSMUSG00000040084 | Bub1b   | -2,246860027 | 0,00077 |
| ENSMUSG00000020654 | Adcy3   | -2,201800108 | 0,00077 |
| ENSMUSG00000005667 | Mthfd2  | -1,706230044 | 0,00077 |
| ENSMUSG00000091337 | Eid1    | -1,515429974 | 0,00077 |
| ENSMUSG00000026928 | Card9   | -1,513470054 | 0,00077 |
| ENSMUSG00000000282 | Mnt     | -0,927929997 | 0,00077 |

|                    |               |              |         |
|--------------------|---------------|--------------|---------|
| ENSMUSG00000032423 | Syncrip       | -0,702149987 | 0,00077 |
| ENSMUSG00000027890 | Gstm4         | 1,762959957  | 0,00077 |
| ENSMUSG00000037169 | Mycn          | 1,768159986  | 0,00077 |
| ENSMUSG00000020830 | Vmo1          | 2,017040014  | 0,00077 |
| ENSMUSG00000041695 | Kcnj2         | -1,617670059 | 0,00078 |
| ENSMUSG00000029276 | Glmn          | -0,901369989 | 0,00078 |
| ENSMUSG00000061731 | Ext1          | -0,833419979 | 0,00078 |
| ENSMUSG00000026950 | Neb           | 2,296880007  | 0,00078 |
| ENSMUSG00000039252 | Lgi2          | -4,50965023  | 0,00078 |
| ENSMUSG00000001995 | Sipa1l2       | -1,71697998  | 0,00078 |
| ENSMUSG00000040891 | Foxa3         | 2,052000046  | 0,00078 |
| ENSMUSG00000031972 | Acta1         | -3,787430048 | 0,00078 |
| ENSMUSG00000046449 | Nexmif        | -3,396080017 | 0,00078 |
| ENSMUSG00000061397 | Krt79         | -2,993040085 | 0,00078 |
| ENSMUSG00000069910 | Spdl1         | -1,621659994 | 0,00078 |
| ENSMUSG00000001674 | Ddx18         | -0,499370009 | 0,00078 |
| ENSMUSG00000031634 | Ufsp2         | 0,541469991  | 0,00078 |
| ENSMUSG00000022684 | Bfar          | 0,918330014  | 0,00078 |
| ENSMUSG00000028247 | Coq3          | 0,979489982  | 0,00079 |
| ENSMUSG00000015519 | 2310057J18Rik | 5,198929787  | 0,00079 |
| ENSMUSG00000037669 | Ldah          | 0,662349999  | 0,00079 |
| ENSMUSG00000037278 | Tmem97        | 1,324900031  | 0,00079 |
| ENSMUSG00000057037 | Cfhr1         | 1,935719967  | 0,00079 |
| ENSMUSG00000025651 | Uqcrc1        | 0,917280018  | 0,00079 |
| ENSMUSG00000028194 | Ddah1         | 1,448500037  | 0,00079 |
| ENSMUSG00000027187 | Cat           | 1,73755002   | 0,00079 |
| ENSMUSG00000097333 | Zfp87         | -0,788540006 | 0,0008  |
| ENSMUSG00000024371 | C2            | 1,789270043  | 0,0008  |
| ENSMUSG00000019303 | Psmc3ip       | -1,882169962 | 0,0008  |
| ENSMUSG00000032839 | Trpc1         | -3,708400011 | 0,0008  |
| ENSMUSG00000005371 | Fbxo11        | -0,699060023 | 0,0008  |
| ENSMUSG00000029998 | Pcyox1        | 1,015149951  | 0,0008  |
| ENSMUSG00000051483 | Cbr1          | 1,711390018  | 0,0008  |
| ENSMUSG00000032602 | Slc25a20      | 0,956200004  | 0,00081 |
| ENSMUSG00000033031 | Cip2a         | -1,394279957 | 0,00082 |
| ENSMUSG00000004263 | Atn1          | -0,987360001 | 0,00082 |
| ENSMUSG00000027349 | Fam98b        | -0,502629995 | 0,00082 |
| ENSMUSG00000058454 | Dhcr7         | 1,389590025  | 0,00082 |
| ENSMUSG00000031637 | Lrp2bp        | 1,693490028  | 0,00082 |
| ENSMUSG00000029082 | Bst1          | -2,021859884 | 0,00082 |
| ENSMUSG00000038524 | Fchsd1        | -1,84473002  | 0,00082 |
| ENSMUSG00000063275 | Hacd1         | -1,324920058 | 0,00082 |
| ENSMUSG00000070056 | Mfhas1        | -0,906029999 | 0,00082 |
| ENSMUSG00000094651 | Gal3st2       | -4,745880127 | 0,00083 |
| ENSMUSG00000001416 | Cct3          | -0,686269999 | 0,00083 |
| ENSMUSG00000068290 | Ddrgk1        | 1,254959941  | 0,00083 |
| ENSMUSG00000035769 | Xylb          | 1,587479949  | 0,00083 |

|                    |            |              |         |
|--------------------|------------|--------------|---------|
| ENSMUSG00000067071 | Hes6       | 1,813429952  | 0,00083 |
| ENSMUSG00000026368 | F13b       | 1,943719983  | 0,00083 |
| ENSMUSG00000022682 | Rrn3       | -0,486680001 | 0,00083 |
| ENSMUSG00000025155 | Dus1l      | 0,872460008  | 0,00083 |
| ENSMUSG00000025105 | Bnc1       | -4,403709888 | 0,00083 |
| ENSMUSG00000026811 | St6galnac6 | 0,918340027  | 0,00084 |
| ENSMUSG00000039377 | Hlx        | -1,173120022 | 0,00084 |
| ENSMUSG00000039043 | Arpin      | -0,677789986 | 0,00084 |
| ENSMUSG00000039065 | Fam173b    | 0,758880019  | 0,00084 |
| ENSMUSG00000045672 | Col27a1    | -1,743049979 | 0,00084 |
| ENSMUSG00000038213 | Tapbp1     | 1,069599986  | 0,00084 |
| ENSMUSG00000024313 | Mep1b      | 3,415920019  | 0,00084 |
| ENSMUSG00000028923 | Necap2     | -1,117040038 | 0,00084 |
| ENSMUSG00000006732 | Mettl1     | 0,966709971  | 0,00084 |
| ENSMUSG00000024858 | Grk2       | -0,529240012 | 0,00085 |
| ENSMUSG00000025060 | Slk        | -1,212409973 | 0,00085 |
| ENSMUSG00000057229 | Dmac2      | 1,055209994  | 0,00085 |
| ENSMUSG00000021506 | Pitx1      | -10,6610899  | 0,00085 |
| ENSMUSG00000025930 | Msc        | -2,391220093 | 0,00085 |
| ENSMUSG00000027573 | Gid8       | 0,68434      | 0,00085 |
| ENSMUSG00000045854 | Lym2       | 0,729900002  | 0,00085 |
| ENSMUSG00000021846 | Peli2      | 0,900860012  | 0,00085 |
| ENSMUSG00000028124 | Gclm       | 1,088850021  | 0,00085 |
| ENSMUSG00000020638 | Cmpk2      | 1,626449943  | 0,00086 |
| ENSMUSG00000024150 | Mcf2       | 0,982980013  | 0,00086 |
| ENSMUSG00000027605 | Acsc2      | 1,6796       | 0,00086 |
| ENSMUSG00000001419 | Mef2d      | -1,241899967 | 0,00086 |
| ENSMUSG00000026874 | Hc         | 2,165889978  | 0,00086 |
| ENSMUSG00000024683 | Mrpl16     | 1,189440012  | 0,00087 |
| ENSMUSG00000037254 | Itih2      | 1,901669979  | 0,00087 |
| ENSMUSG00000031563 | Wwc2       | -0,839259982 | 0,00087 |
| ENSMUSG00000027198 | Ext2       | -0,568870008 | 0,00087 |
| ENSMUSG00000026715 | Serpinc1   | 1,951570034  | 0,00087 |
| ENSMUSG00000040883 | Tmem205    | 1,993530035  | 0,00087 |
| ENSMUSG00000054013 | Tmem179    | -10,97770977 | 0,00088 |
| ENSMUSG00000073295 | Nudt11     | -2,750910044 | 0,00088 |
| ENSMUSG00000049999 | Ppp1r3d    | -1,977090001 | 0,00088 |
| ENSMUSG00000024037 | Wdr4       | -0,390560001 | 0,00088 |
| ENSMUSG00000033147 | Slc22a15   | 1,043529987  | 0,00088 |
| ENSMUSG00000021000 | Mia2       | 1,194300056  | 0,00088 |
| ENSMUSG00000020848 | Doc2b      | -4,679780006 | 0,00088 |
| ENSMUSG00000020089 | Ppa1       | 1,085070014  | 0,00089 |
| ENSMUSG00000002588 | Pon1       | 2,060549974  | 0,00089 |
| ENSMUSG00000090626 | Tex9       | -2,051579952 | 0,00089 |
| ENSMUSG00000052031 | Tagap1     | -0,862489998 | 0,0009  |
| ENSMUSG00000027670 | Ocstamp    | 1,686849952  | 0,0009  |
| ENSMUSG00000031618 | Nr3c2      | 1,660019994  | 0,00091 |

|                    |          |              |         |
|--------------------|----------|--------------|---------|
| ENSMUSG00000036641 | Ccdc148  | 1,721320033  | 0,00091 |
| ENSMUSG00000066952 | Myo1h    | -4,836289883 | 0,00091 |
| ENSMUSG0000002688  | Prkd1    | -1,61176002  | 0,00091 |
| ENSMUSG00000035236 | Scai     | -1,48269999  | 0,00091 |
| ENSMUSG00000048351 | Coa7     | 1,275300026  | 0,00091 |
| ENSMUSG00000020182 | Ddc      | 1,997290015  | 0,00091 |
| ENSMUSG00000070822 | Zscan18  | -3,155220032 | 0,00091 |
| ENSMUSG00000000392 | Fap      | -2,910599947 | 0,00091 |
| ENSMUSG00000052565 | Hist1h1d | -1,961420059 | 0,00091 |
| ENSMUSG00000079215 | Zfp664   | -0,74387002  | 0,00091 |
| ENSMUSG00000029729 | Zkscan1  | 0,828790009  | 0,00091 |
| ENSMUSG00000021772 | Nkiras1  | 1,399000049  | 0,00091 |
| ENSMUSG00000036928 | Stag3    | -3,545059919 | 0,00092 |
| ENSMUSG00000033533 | Acsn1    | 1,943570018  | 0,00092 |
| ENSMUSG00000035686 | Thrsp    | 2,65892005   | 0,00092 |
| ENSMUSG00000060275 | Nrg2     | -4,570310116 | 0,00092 |
| ENSMUSG00000030276 | Ttl3     | -2,093650103 | 0,00092 |
| ENSMUSG00000030909 | Anks4b   | 1,917050004  | 0,00092 |
| ENSMUSG00000024331 | Dsc2     | 1,471339941  | 0,00093 |
| ENSMUSG00000025934 | Gsta3    | 2,060940027  | 0,00093 |
| ENSMUSG00000032122 | Slc37a2  | -0,839749992 | 0,00093 |
| ENSMUSG00000028019 | Pdgfc    | -1,507940054 | 0,00093 |
| ENSMUSG00000036918 | Ttc7     | 1,085530043  | 0,00093 |
| ENSMUSG00000048752 | Prss50   | 3,48112011   | 0,00093 |
| ENSMUSG00000001380 | Hars     | -0,523899972 | 0,00094 |
| ENSMUSG00000051159 | Cited1   | -4,359889984 | 0,00094 |
| ENSMUSG00000024424 | Ttc39c   | 1,552019954  | 0,00094 |
| ENSMUSG00000041879 | Ipo9     | -0,95678997  | 0,00094 |
| ENSMUSG00000023973 | Cnpy3    | 0,6171       | 0,00094 |
| ENSMUSG00000025278 | Flnb     | -1,68453002  | 0,00094 |
| ENSMUSG00000070427 | Il18bp   | 1,352130055  | 0,00094 |
| ENSMUSG00000021675 | F2rl2    | -3,318900108 | 0,00095 |
| ENSMUSG00000047632 | Fgfbp3   | -1,669950008 | 0,00095 |
| ENSMUSG00000022747 | St3gal6  | -1,61966002  | 0,00095 |
| ENSMUSG00000059479 | B3gnt8   | -1,547410011 | 0,00095 |
| ENSMUSG00000003154 | Foxj2    | -0,739380002 | 0,00095 |
| ENSMUSG00000045333 | Zfp423   | -2,194279909 | 0,00095 |
| ENSMUSG00000029623 | Pdap1    | -0,494019985 | 0,00095 |
| ENSMUSG00000056553 | Ptprn2   | -8,938899994 | 0,00095 |
| ENSMUSG00000030421 | Uri1     | 0,597500026  | 0,00095 |
| ENSMUSG00000034917 | Tjp3     | 1,612130046  | 0,00095 |
| ENSMUSG00000025997 | Ikzf2    | -1,867560029 | 0,00095 |
| ENSMUSG00000032745 | Gbp1     | -0,440880001 | 0,00095 |
| ENSMUSG00000058794 | Nfe2     | 1,787029982  | 0,00095 |
| ENSMUSG00000074748 | Atxn7l3b | 0,599629998  | 0,00096 |
| ENSMUSG00000040612 | lldr2    | 1,418640018  | 0,00096 |
| ENSMUSG00000024810 | Il33     | -1,824499965 | 0,00096 |



|                    |         |              |         |
|--------------------|---------|--------------|---------|
| ENSMUSG00000022210 | Dhrs4   | 1,490170002  | 0,00096 |
| ENSMUSG00000029775 | Klhdc10 | 0,893850029  | 0,00096 |
| ENSMUSG00000042808 | Gpx2    | -2,969439983 | 0,00097 |
| ENSMUSG00000038037 | Socs1   | -1,622050047 | 0,00097 |
| ENSMUSG00000039852 | Rere    | -0,920740008 | 0,00097 |
| ENSMUSG00000001910 | Nacc1   | -0,767040014 | 0,00097 |
| ENSMUSG00000062785 | Kcnc3   | 1,848940015  | 0,00097 |
| ENSMUSG00000026980 | Ly75    | -1,111969948 | 0,00097 |
| ENSMUSG00000048040 | Arxes2  | -3,824480057 | 0,00098 |
| ENSMUSG00000001767 | Crnkl1  | -0,481940001 | 0,00098 |
| ENSMUSG00000031262 | Cenpi   | -2,163789988 | 0,00099 |
| ENSMUSG00000039055 | Eme1    | -2,077820063 | 0,00099 |
| ENSMUSG00000031756 | Cenpn   | -1,510529995 | 0,00099 |
| ENSMUSG00000050812 | Ecpas   | 0,525569975  | 0,00099 |
| ENSMUSG00000056458 | Mok     | -2,373110056 | 0,00099 |
| ENSMUSG00000037300 | Ttc13   | -0,520110011 | 0,00099 |
| ENSMUSG00000036983 | Tfb1m   | 1,041429996  | 0,00099 |
| ENSMUSG00000075705 | Msrb1   | 1,609840035  | 0,001   |
| ENSMUSG00000005873 | Reep5   | -1,56712997  | 0,001   |
| ENSMUSG00000042472 | Zfp410  | -0,650110006 | 0,001   |
| ENSMUSG00000001588 | Acap1   | -1,057739973 | 0,001   |
| ENSMUSG00000037617 | Spag1   | -1,429409981 | 0,00101 |
| ENSMUSG00000024118 | Tedc2   | 1,636070013  | 0,00101 |
| ENSMUSG00000025479 | Cyp2e1  | 2,089770079  | 0,00101 |
| ENSMUSG00000021583 | Erap1   | 1,302960038  | 0,00101 |
| ENSMUSG00000031921 | Terf2   | -0,535820007 | 0,00102 |
| ENSMUSG00000000317 | Bcl6b   | -1,46736002  | 0,00102 |
| ENSMUSG00000040296 | Ddx58   | 1,215520024  | 0,00102 |
| ENSMUSG00000075569 | Rsph10b | -4,134659767 | 0,00102 |
| ENSMUSG00000005804 | Bloc1s6 | -0,402880013 | 0,00102 |
| ENSMUSG00000020456 | Ogdh    | 0,690789998  | 0,00102 |
| ENSMUSG00000025964 | Adam23  | 1,57404995   | 0,00102 |
| ENSMUSG00000028556 | Dock7   | -1,209840059 | 0,00102 |
| ENSMUSG00000020069 | Hnrnp3  | -0,562870026 | 0,00102 |
| ENSMUSG00000020086 | H2afy2  | -1,398579955 | 0,00103 |
| ENSMUSG00000021621 | Zcchc9  | -0,532800019 | 0,00103 |
| ENSMUSG00000024064 | Galnt14 | -3,451709986 | 0,00103 |
| ENSMUSG00000053062 | Jam2    | -1,093160033 | 0,00103 |
| ENSMUSG00000044712 | Slc38a6 | -0,844889998 | 0,00103 |
| ENSMUSG00000030452 | Nipa2   | 0,589209974  | 0,00103 |
| ENSMUSG00000027160 | Ccdc34  | -1,419319987 | 0,00104 |
| ENSMUSG00000022833 | Ccdc14  | -1,174880028 | 0,00104 |
| ENSMUSG00000020024 | Cep83   | -0,668900013 | 0,00104 |
| ENSMUSG00000000881 | Dlg3    | -0,862770021 | 0,00104 |
| ENSMUSG00000044707 | Ccnjl   | -2,666970015 | 0,00104 |
| ENSMUSG00000050777 | Tmem37  | 1,730999947  | 0,00104 |
| ENSMUSG00000026417 | Pigr    | 2,033200026  | 0,00104 |

|                    |               |              |         |
|--------------------|---------------|--------------|---------|
| ENSMUSG00000010064 | Slc38a3       | 2,082030058  | 0,00104 |
| ENSMUSG00000039395 | Mreg          | 1,817409992  | 0,00105 |
| ENSMUSG00000028773 | Fabp3         | -3,84187007  | 0,00105 |
| ENSMUSG00000035818 | Plekhs1       | -1,946840048 | 0,00105 |
| ENSMUSG00000033721 | Vav3          | -0,918889999 | 0,00105 |
| ENSMUSG00000029521 | Chek2         | -1,02252996  | 0,00105 |
| ENSMUSG00000045658 | Pid1          | 1,679080009  | 0,00105 |
| ENSMUSG00000037548 | H2-DMb2       | -1,62282002  | 0,00106 |
| ENSMUSG00000039981 | Zc3h12d       | 1,973399997  | 0,00106 |
| ENSMUSG00000031825 | Crispld2      | -2,882200003 | 0,00106 |
| ENSMUSG00000056004 | 9330182L06Rik | -2,161509991 | 0,00106 |
| ENSMUSG00000027983 | Cyp2u1        | 2,219630003  | 0,00106 |
| ENSMUSG00000021809 | Nudt13        | 0,989989996  | 0,00107 |
| ENSMUSG00000053338 | Tarm1         | -6,636660099 | 0,00107 |
| ENSMUSG00000018476 | Kdm6b         | -1,562819958 | 0,00107 |
| ENSMUSG00000042613 | Pbxip1        | -0,783460021 | 0,00107 |
| ENSMUSG00000041488 | Stx3          | -0,545180023 | 0,00107 |
| ENSMUSG00000038342 | Mlxip         | -1,345739961 | 0,00107 |
| ENSMUSG00000078963 | Hsbp1l1       | 2,050869942  | 0,00108 |
| ENSMUSG00000013367 | Igln5         | -3,096050024 | 0,00108 |
| ENSMUSG00000037185 | Krt80         | -3,039200068 | 0,00108 |
| ENSMUSG00000034949 | Zfr2          | -2,318490028 | 0,00108 |
| ENSMUSG00000002477 | Snrpd1        | -1,409540057 | 0,00108 |
| ENSMUSG00000029478 | Ncor2         | -1,140450001 | 0,00108 |
| ENSMUSG00000026857 | Ntmt1         | -0,949519992 | 0,00108 |
| ENSMUSG00000022247 | Brix1         | -0,697359979 | 0,00108 |
| ENSMUSG00000034673 | Pbx2          | -0,484549999 | 0,00108 |
| ENSMUSG00000040003 | Magi2         | -2,63519001  | 0,00109 |
| ENSMUSG00000025351 | Cd63          | -1,652619958 | 0,00109 |
| ENSMUSG00000035329 | Fbxo33        | -0,814670026 | 0,00109 |
| ENSMUSG00000014074 | Rnf168        | 0,48041001   | 0,00109 |
| ENSMUSG00000025494 | Sigirr        | 1,173979998  | 0,00109 |
| ENSMUSG00000026896 | Ifih1         | 1,451910019  | 0,00109 |
| ENSMUSG00000036216 | Leap2         | 2,280499935  | 0,00109 |
| ENSMUSG00000027752 | Exosc8        | -1,044090033 | 0,00109 |
| ENSMUSG00000001707 | Eef1e1        | -1,151870012 | 0,0011  |
| ENSMUSG00000032776 | Mctp2         | 1,215610027  | 0,0011  |
| ENSMUSG00000060459 | Kng2          | 1,78125      | 0,0011  |
| ENSMUSG00000020832 | Eral1         | 0,456270009  | 0,0011  |
| ENSMUSG00000022292 | Rrm2b         | -1,235499978 | 0,0011  |
| ENSMUSG00000028453 | Fancg         | -0,891099989 | 0,00111 |
| ENSMUSG00000024835 | Coro1b        | -0,547060013 | 0,00111 |
| ENSMUSG00000021130 | Galnt16       | -5,808169842 | 0,00111 |
| ENSMUSG00000058254 | Tspan7        | -1,078099966 | 0,00111 |
| ENSMUSG00000058624 | Gda           | -0,906690001 | 0,00111 |
| ENSMUSG00000053289 | Ddx10         | -0,441139996 | 0,00111 |
| ENSMUSG00000039782 | Cpeb2         | 1,086969972  | 0,00111 |

|                    |               |              |         |
|--------------------|---------------|--------------|---------|
| ENSMUSG00000025085 | Ablim1        | 1,479799986  | 0,00111 |
| ENSMUSG00000002055 | Spag5         | -2,088350058 | 0,00111 |
| ENSMUSG00000036529 | Sbf1          | -0,79223001  | 0,00111 |
| ENSMUSG00000030689 | Ino80e        | -0,743690014 | 0,00111 |
| ENSMUSG00000036879 | Phkb          | 0,849020004  | 0,00111 |
| ENSMUSG00000028636 | Ppcs          | 1,415120006  | 0,00111 |
| ENSMUSG00000020149 | Rab1a         | 0,386059999  | 0,00112 |
| ENSMUSG00000025393 | Atp5b         | 0,480269998  | 0,00112 |
| ENSMUSG00000052033 | Pfdn4         | -1,430080056 | 0,00112 |
| ENSMUSG00000036057 | Ptpn23        | -1,218009949 | 0,00112 |
| ENSMUSG00000021938 | Pspc1         | -0,797140002 | 0,00112 |
| ENSMUSG00000046516 | Cox17         | -1,08991003  | 0,00112 |
| ENSMUSG00000001911 | Nfix          | 1,015750051  | 0,00112 |
| ENSMUSG00000063232 | Serpina11     | 2,087310076  | 0,00112 |
| ENSMUSG00000038859 | Baiap211      | -0,967490017 | 0,00113 |
| ENSMUSG00000031853 | Map3k21       | 1,318050027  | 0,00113 |
| ENSMUSG00000020532 | Acaca         | 1,524510026  | 0,00113 |
| ENSMUSG00000025270 | Alas2         | 1,671259999  | 0,00113 |
| ENSMUSG00000049755 | Zfp672        | 0,592980027  | 0,00113 |
| ENSMUSG00000022792 | Yars2         | 0,750349998  | 0,00114 |
| ENSMUSG00000033768 | Nrxn2         | -1,976140022 | 0,00114 |
| ENSMUSG00000037375 | Hhat          | -1,346109986 | 0,00114 |
| ENSMUSG00000044150 | Bclaf3        | -1,120609999 | 0,00114 |
| ENSMUSG00000028224 | Nbn           | 0,511940002  | 0,00114 |
| ENSMUSG00000023259 | Slc26a6       | 1,041610003  | 0,00114 |
| ENSMUSG00000039238 | Zfp750        | 1,742840052  | 0,00114 |
| ENSMUSG00000079144 | A130010J15Rik | 0,884519994  | 0,00114 |
| ENSMUSG00000029275 | Gfi1          | -3,128629923 | 0,00115 |
| ENSMUSG00000028078 | Dclk2         | -1,920590043 | 0,00116 |
| ENSMUSG00000053581 | Zfand2a       | -0,926869988 | 0,00116 |
| ENSMUSG00000022809 | Nr1i2         | 1,531080008  | 0,00116 |
| ENSMUSG00000047143 | Dmrta2        | -4,003109932 | 0,00116 |
| ENSMUSG00000073176 | Zfp449        | -1,698889971 | 0,00116 |
| ENSMUSG00000050212 | Eva1b         | -1,638389945 | 0,00116 |
| ENSMUSG00000079491 | H2-T10        | 1,247419953  | 0,00116 |
| ENSMUSG00000071856 | Mcc           | 1,500699997  | 0,00116 |
| ENSMUSG00000001517 | Foxm1         | -1,977980018 | 0,00117 |
| ENSMUSG00000022009 | Nufip1        | -0,658779979 | 0,00117 |
| ENSMUSG00000028944 | Prkag2        | 0,736570001  | 0,00118 |
| ENSMUSG00000018707 | Dync1h1       | -0,820829988 | 0,00118 |
| ENSMUSG00000036052 | Dnajb5        | -0,65267998  | 0,00118 |
| ENSMUSG00000027406 | Idh3b         | 0,621770024  | 0,00118 |
| ENSMUSG00000020493 | Prr11         | -2,526859999 | 0,00118 |
| ENSMUSG00000033965 | Slc16a2       | 1,55448997   | 0,00118 |
| ENSMUSG00000020593 | Lpin1         | 1,74822998   | 0,00119 |
| ENSMUSG00000027115 | Kif18a        | -1,581179976 | 0,00119 |
| ENSMUSG00000021495 | Fam193b       | -0,813059986 | 0,00119 |

|                     |               |              |         |
|---------------------|---------------|--------------|---------|
| ENSMUSG00000031099  | Smarca1       | -3,652770042 | 0,0012  |
| ENSMUSG00000038646  | Ramac         | 0,624989986  | 0,0012  |
| ENSMUSG00000006395  | Hyi           | 1,49714005   | 0,0012  |
| ENSMUSG000000045319 | Proser2       | 1,237380028  | 0,0012  |
| ENSMUSG000000032554 | Trf           | 1,835690022  | 0,0012  |
| ENSMUSG000000001095 | Slc13a2       | 2,321860075  | 0,00121 |
| ENSMUSG000000044164 | Rnf182        | -6,428929806 | 0,00121 |
| ENSMUSG000000017561 | Crlf3         | -0,45262     | 0,00121 |
| ENSMUSG000000024897 | Apba1         | -2,016599894 | 0,00121 |
| ENSMUSG000000040359 | Ufl1          | 1,146669984  | 0,00121 |
| ENSMUSG000000043924 | Ncmap         | -2,023180008 | 0,00122 |
| ENSMUSG000000036916 | Zfp280c       | -0,764840007 | 0,00122 |
| ENSMUSG000000052776 | Oas1a         | 1,534950018  | 0,00122 |
| ENSMUSG000000026832 | Cytip         | -1,264600039 | 0,00123 |
| ENSMUSG000000022679 | Mpv17l        | 1,283839941  | 0,00123 |
| ENSMUSG000000028100 | Nudt17        | -2,347990036 | 0,00123 |
| ENSMUSG000000001983 | Taco1         | 0,939769983  | 0,00123 |
| ENSMUSG000000036492 | Rnf39         | 1,865180016  | 0,00123 |
| ENSMUSG000000044254 | Pcsk9         | 1,530019999  | 0,00123 |
| ENSMUSG000000066643 | Wdr35         | -1,168830037 | 0,00124 |
| ENSMUSG000000027398 | Il1b          | -1,910959959 | 0,00124 |
| ENSMUSG000000026483 | Fam129a       | -1,733850002 | 0,00124 |
| ENSMUSG000000005686 | Ampd3         | -1,344830036 | 0,00124 |
| ENSMUSG000000031889 | D230025D16Rik | 0,916580021  | 0,00124 |
| ENSMUSG000000067144 | Slc22a7       | 2,333669901  | 0,00124 |
| ENSMUSG000000031779 | Ccl22         | -3,156919956 | 0,00125 |
| ENSMUSG000000024381 | Bin1          | -1,076439977 | 0,00125 |
| ENSMUSG000000018326 | Ywhab         | -0,27895999  | 0,00125 |
| ENSMUSG000000073411 | H2-D1         | 1,113890052  | 0,00125 |
| ENSMUSG000000035227 | Spcs2         | 0,950269997  | 0,00125 |
| ENSMUSG000000018669 | Cdk5rap3      | 0,99673003   | 0,00125 |
| ENSMUSG000000020447 | Npc1l1        | 2,18295002   | 0,00125 |
| ENSMUSG000000036833 | Pnpla7        | 1,698559999  | 0,00125 |
| ENSMUSG000000030123 | Plxnd1        | -0,701009989 | 0,00126 |
| ENSMUSG000000048924 | Ccdc125       | 1,339900017  | 0,00126 |
| ENSMUSG000000044033 | Ccdc141       | 1,777500033  | 0,00126 |
| ENSMUSG000000028356 | Ambp          | 1,767079949  | 0,00126 |
| ENSMUSG000000020151 | Ptpr          | -4,033120155 | 0,00127 |
| ENSMUSG000000034226 | Rhov          | -3,529710054 | 0,00127 |
| ENSMUSG000000052485 | Tmem171       | -2,529589891 | 0,00127 |
| ENSMUSG000000048142 | Nat8l         | -2,501749992 | 0,00127 |
| ENSMUSG000000059456 | Ptk2b         | -0,82457     | 0,00127 |
| ENSMUSG000000033597 | Caskin1       | -3,679199934 | 0,00127 |
| ENSMUSG000000026917 | Wdr5          | -0,447809994 | 0,00127 |
| ENSMUSG000000024155 | Meiob         | 1,943130016  | 0,00127 |
| ENSMUSG000000037126 | Psd           | -2,032279968 | 0,00128 |
| ENSMUSG000000052302 | Tbc1d30       | 1,67482996   | 0,00128 |

|                    |          |              |         |
|--------------------|----------|--------------|---------|
| ENSMUSG00000027238 | Frmd5    | -4,682859898 | 0,00128 |
| ENSMUSG00000079509 | Zfx      | -0,550509989 | 0,00128 |
| ENSMUSG00000039013 | Siglecf  | -2,309020042 | 0,00129 |
| ENSMUSG00000022757 | Tfg      | 0,583289981  | 0,00129 |
| ENSMUSG00000021224 | Numb     | 0,939840019  | 0,00129 |
| ENSMUSG00000027875 | Hmgcs2   | 1,748999953  | 0,0013  |
| ENSMUSG00000053559 | Smagp    | 1,758919954  | 0,0013  |
| ENSMUSG00000052056 | Zfp217   | -1,109570026 | 0,00131 |
| ENSMUSG00000029189 | Sel1l3   | 1,192549944  | 0,00131 |
| ENSMUSG00000042489 | Clspn    | -1,922039986 | 0,00131 |
| ENSMUSG00000030677 | Kif22    | -1,559790015 | 0,00131 |
| ENSMUSG00000022040 | Ephx2    | 1,428670049  | 0,00131 |
| ENSMUSG00000047631 | Apof     | 2,053630114  | 0,00131 |
| ENSMUSG00000009406 | Elk1     | -1,139840007 | 0,00132 |
| ENSMUSG00000040025 | Ythdf2   | -0,410400003 | 0,00132 |
| ENSMUSG00000008035 | Mid1ip1  | 1,360610008  | 0,00132 |
| ENSMUSG00000037580 | Gch1     | 1,554090023  | 0,00132 |
| ENSMUSG00000079083 | Jrkl     | -0,756120026 | 0,00132 |
| ENSMUSG00000022022 | Mtrf1    | 0,831480026  | 0,00132 |
| ENSMUSG00000024892 | Pcx      | 1,487040043  | 0,00132 |
| ENSMUSG00000026764 | Kif5c    | 1,764350057  | 0,00132 |
| ENSMUSG00000063683 | Glyat    | 2,064690113  | 0,00132 |
| ENSMUSG00000023034 | Nr4a1    | -1,540449977 | 0,00132 |
| ENSMUSG00000024043 | Arhgap28 | -1,82641995  | 0,00133 |
| ENSMUSG00000024357 | Sil1     | 1,063230038  | 0,00133 |
| ENSMUSG00000025190 | Got1     | 1,309499979  | 0,00133 |
| ENSMUSG00000026965 | Anapc2   | -0,280200005 | 0,00133 |
| ENSMUSG00000026946 | Nmi      | 1,279160023  | 0,00134 |
| ENSMUSG00000042807 | Hecw2    | -1,030369997 | 0,00134 |
| ENSMUSG00000039977 | Deup1    | 2,565220118  | 0,00134 |
| ENSMUSG00000003824 | Syce2    | -0,966949999 | 0,00134 |
| ENSMUSG00000021236 | Entpd5   | 1,401270032  | 0,00134 |
| ENSMUSG00000035459 | Stab2    | 1,585420012  | 0,00134 |
| ENSMUSG00000012889 | Podnl1   | -2,738500118 | 0,00135 |
| ENSMUSG00000058290 | Espl1    | -1,965010047 | 0,00135 |
| ENSMUSG00000024130 | Abca3    | 2,336810112  | 0,00135 |
| ENSMUSG00000021013 | Ttc8     | -1,413349986 | 0,00135 |
| ENSMUSG00000023031 | Cela1    | 1,763249993  | 0,00135 |
| ENSMUSG00000040969 | Arhgef38 | -3,743340015 | 0,00135 |
| ENSMUSG00000034320 | Slc26a2  | -1,140810013 | 0,00136 |
| ENSMUSG00000040033 | Stat2    | 1,147469997  | 0,00136 |
| ENSMUSG00000030079 | Ruvbl1   | -0,672140002 | 0,00136 |
| ENSMUSG00000004552 | Ctse     | -2,55430007  | 0,00137 |
| ENSMUSG00000019992 | Mtfr2    | -2,048229933 | 0,00137 |
| ENSMUSG00000022865 | Cxadr    | 1,191630006  | 0,00137 |
| ENSMUSG00000078816 | Prkcg    | -3,70423007  | 0,00137 |
| ENSMUSG00000041995 | Zbed3    | -0,945529997 | 0,00137 |

|                    |          |              |         |
|--------------------|----------|--------------|---------|
| ENSMUSG00000069874 | Irgm2    | 1,686169982  | 0,00137 |
| ENSMUSG00000029575 | Mmab     | 1,388380051  | 0,00138 |
| ENSMUSG00000033174 | Mgll     | 1,414800048  | 0,00138 |
| ENSMUSG00000033577 | Myo6     | 0,770110011  | 0,00139 |
| ENSMUSG00000036295 | Lrrn3    | -1,908059955 | 0,00139 |
| ENSMUSG00000035455 | Figl1    | -1,677620053 | 0,00139 |
| ENSMUSG00000022305 | Lrp12    | -1,260800004 | 0,00139 |
| ENSMUSG00000002325 | Irf9     | 0,851170003  | 0,00139 |
| ENSMUSG00000020679 | Hnf1b    | 1,349220037  | 0,00139 |
| ENSMUSG00000032786 | Alas1    | 1,847450018  | 0,00139 |
| ENSMUSG00000022021 | Diaph3   | -2,057240009 | 0,00139 |
| ENSMUSG00000025875 | Tspan17  | -1,542619944 | 0,00139 |
| ENSMUSG00000027457 | Snph     | -5,00853014  | 0,0014  |
| ENSMUSG00000050957 | Insl6    | -2,476639986 | 0,0014  |
| ENSMUSG00000066319 | Rtp3     | 2,116919994  | 0,0014  |
| ENSMUSG00000004945 | Tmem242  | 0,64380002   | 0,00141 |
| ENSMUSG00000041362 | Shtn1    | 1,298370004  | 0,00141 |
| ENSMUSG00000032870 | Smap2    | 0,770850003  | 0,00141 |
| ENSMUSG00000000399 | Ndufa9   | 0,956579983  | 0,00141 |
| ENSMUSG00000032526 | Ss18l2   | 1,393239975  | 0,00141 |
| ENSMUSG00000024066 | Xdh      | 1,40850997   | 0,00141 |
| ENSMUSG00000020431 | Adcy1    | 2,234750032  | 0,00141 |
| ENSMUSG00000038754 | Elovl3   | 2,997910023  | 0,00141 |
| ENSMUSG00000078853 | Igtp     | 1,666489959  | 0,00142 |
| ENSMUSG00000044749 | Abca6    | 2,327800035  | 0,00142 |
| ENSMUSG00000038759 | Nup205   | -0,944000006 | 0,00142 |
| ENSMUSG00000029141 | Slc4a1ap | -0,375999987 | 0,00142 |
| ENSMUSG00000020459 | Mtif2    | 0,676859975  | 0,00142 |
| ENSMUSG00000028098 | Rnf115   | 0,472259998  | 0,00142 |
| ENSMUSG00000020029 | Nudt4    | 0,669510007  | 0,00142 |
| ENSMUSG00000063063 | Ctnna2   | -3,262059927 | 0,00143 |
| ENSMUSG00000040121 | Rep15    | -2,702409983 | 0,00143 |
| ENSMUSG00000059890 | Ube4a    | 0,642539978  | 0,00143 |
| ENSMUSG00000032763 | Ilvbl    | 0,742150009  | 0,00143 |
| ENSMUSG00000091144 | Phf11c   | 1,280900002  | 0,00143 |
| ENSMUSG00000046814 | Gchfr    | 2,052139997  | 0,00143 |
| ENSMUSG00000021539 | Lect2    | 1,801460028  | 0,00144 |
| ENSMUSG00000026489 | Coq8a    | 2,105180025  | 0,00144 |
| ENSMUSG00000015968 | Cacna1d  | 1,223320007  | 0,00144 |
| ENSMUSG00000022687 | Boc      | -2,754810095 | 0,00145 |
| ENSMUSG00000025792 | Slc25a10 | 1,014729977  | 0,00145 |
| ENSMUSG00000075327 | Zbtb2    | -0,533469975 | 0,00145 |
| ENSMUSG00000019710 | Mrpl24   | 0,63647002   | 0,00145 |
| ENSMUSG00000024054 | Smchd1   | -0,852169991 | 0,00146 |
| ENSMUSG00000030314 | Atg7     | 0,468059987  | 0,00147 |
| ENSMUSG00000030062 | Rpn1     | 0,652880013  | 0,00147 |
| ENSMUSG00000071266 | Zfp946   | 0,855650008  | 0,00147 |

|                    |               |              |         |
|--------------------|---------------|--------------|---------|
| ENSMUSG00000026272 | Agxt          | 2,244829893  | 0,00147 |
| ENSMUSG00000026683 | Nuf2          | -1,825999975 | 0,00147 |
| ENSMUSG00000021916 | Glt8d1        | -0,667620003 | 0,00147 |
| ENSMUSG00000024287 | Thoc1         | -0,651750028 | 0,00147 |
| ENSMUSG00000071477 | Zfp777        | -0,617060006 | 0,00147 |
| ENSMUSG00000025127 | Gcgr          | 1,845780015  | 0,00147 |
| ENSMUSG00000060803 | Gstp1         | 1,952640057  | 0,00147 |
| ENSMUSG00000025591 | Tma16         | -0,663299978 | 0,00148 |
| ENSMUSG00000038695 | Josd2         | 1,075230002  | 0,00148 |
| ENSMUSG00000058396 | Gpr182        | 1,521299958  | 0,00148 |
| ENSMUSG00000071719 | Tmem28        | 2,063359976  | 0,00148 |
| ENSMUSG00000044156 | Hepacam2      | -2,752660036 | 0,00149 |
| ENSMUSG00000026113 | Inpp4a        | 0,754570007  | 0,00149 |
| ENSMUSG00000034227 | Foxj1         | -2,644540071 | 0,00149 |
| ENSMUSG00000031591 | Asah1         | -0,693059981 | 0,00149 |
| ENSMUSG00000002996 | Hbp1          | 0,475609988  | 0,00149 |
| ENSMUSG00000006818 | Sod2          | 1,113780022  | 0,00149 |
| ENSMUSG00000025658 | Cnksr2        | -5,552830219 | 0,0015  |
| ENSMUSG00000021103 | Mnat1         | -0,832409978 | 0,0015  |
| ENSMUSG00000010097 | Nxf1          | -0,596740007 | 0,0015  |
| ENSMUSG00000039801 | Cplane1       | -1,116449952 | 0,0015  |
| ENSMUSG00000001039 | B9d1          | -1,926290035 | 0,00151 |
| ENSMUSG00000008129 | 4930432K21Rik | -2,312930107 | 0,00151 |
| ENSMUSG00000073131 | Vma21         | 0,375750005  | 0,00152 |
| ENSMUSG00000034875 | Nudt19        | 1,489609957  | 0,00152 |
| ENSMUSG00000050447 | Lypd6         | -3,462090015 | 0,00152 |
| ENSMUSG00000004530 | Coro1c        | -1,563699961 | 0,00152 |
| ENSMUSG00000050222 | Il17d         | -2,937639952 | 0,00152 |
| ENSMUSG00000021585 | Cast          | -0,917379975 | 0,00153 |
| ENSMUSG00000053898 | Ech1          | 0,991819978  | 0,00153 |
| ENSMUSG00000044162 | Tnip3         | -2,733170033 | 0,00153 |
| ENSMUSG00000036596 | Cpz           | -1,871520042 | 0,00153 |
| ENSMUSG00000025175 | Fn3k          | 2,137550116  | 0,00153 |
| ENSMUSG00000036840 | Siah1a        | -0,94325     | 0,00154 |
| ENSMUSG00000018916 | Csf2          | -9,175169945 | 0,00154 |
| ENSMUSG00000022306 | Zfpm2         | -1,497849941 | 0,00155 |
| ENSMUSG00000021112 | Mpp5          | -0,644739985 | 0,00155 |
| ENSMUSG00000037752 | Xkr8          | 1,032999992  | 0,00155 |
| ENSMUSG00000034422 | Parp14        | 1,397719979  | 0,00155 |
| ENSMUSG00000027359 | Slc27a2       | 1,893260002  | 0,00155 |
| ENSMUSG00000027894 | Slc6a17       | -8,283800125 | 0,00155 |
| ENSMUSG00000032113 | Chek1         | -1,270609975 | 0,00155 |
| ENSMUSG00000024558 | Mapk4         | -1,758170009 | 0,00156 |
| ENSMUSG00000038212 | Mfsd14b       | 0,32971999   | 0,00156 |
| ENSMUSG00000036275 | 9530068E07Rik | -0,307749987 | 0,00156 |
| ENSMUSG00000007603 | Dus3l         | -0,455579996 | 0,00156 |
| ENSMUSG00000039634 | Zfp189        | 0,60759002   | 0,00156 |



|                    |          |              |         |
|--------------------|----------|--------------|---------|
| ENSMUSG00000059743 | Fdps     | 1,512650013  | 0,00156 |
| ENSMUSG00000055415 | Atp10b   | -2,637470007 | 0,00157 |
| ENSMUSG00000027368 | Dusp2    | -1,641420007 | 0,00157 |
| ENSMUSG00000045482 | Trrap    | -0,939649999 | 0,00157 |
| ENSMUSG00000090084 | Srpx     | -2,993590117 | 0,00157 |
| ENSMUSG00000044221 | Grsf1    | 0,441359997  | 0,00157 |
| ENSMUSG00000061451 | Tmem151a | -2,292289972 | 0,00158 |
| ENSMUSG00000038611 | Phrf1    | -0,932280004 | 0,00158 |
| ENSMUSG00000033355 | Rtp4     | 1,537989974  | 0,00158 |
| ENSMUSG00000025647 | Shisa5   | -0,816969991 | 0,00158 |
| ENSMUSG00000024271 | Elp2     | -0,467669994 | 0,00159 |
| ENSMUSG00000053094 | Tmem248  | 0,412180007  | 0,00159 |
| ENSMUSG00000047746 | Fbxo40   | 2,213360071  | 0,00159 |
| ENSMUSG00000036391 | Sec24a   | 1,119150043  | 0,00159 |
| ENSMUSG00000027699 | Ect2     | -1,587389946 | 0,00159 |
| ENSMUSG00000090000 | Ier3ip1  | -1,026950002 | 0,00159 |
| ENSMUSG00000028223 | Decr1    | 1,244609952  | 0,0016  |
| ENSMUSG00000022122 | Ednrb    | -1,113559961 | 0,0016  |
| ENSMUSG00000026405 | C4bp     | 1,801159978  | 0,00161 |
| ENSMUSG00000032198 | Dock6    | 1,100600004  | 0,00161 |
| ENSMUSG00000030157 | Clec2d   | 1,80388999   | 0,00161 |
| ENSMUSG00000024853 | Sf3b2    | -0,283589989 | 0,00161 |
| ENSMUSG00000020019 | Ntn4     | -1,185029984 | 0,00162 |
| ENSMUSG00000015854 | Cd5l     | 2,046720028  | 0,00162 |
| ENSMUSG00000004565 | Pnpla6   | -0,892019987 | 0,00162 |
| ENSMUSG00000023147 | Wrb      | -0,590659976 | 0,00162 |
| ENSMUSG00000036078 | Sigmar1  | 0,945190012  | 0,00162 |
| ENSMUSG00000030615 | Tmem126a | 1,037819982  | 0,00162 |
| ENSMUSG00000002718 | Cse1l    | -0,411139995 | 0,00162 |
| ENSMUSG00000000948 | Gm38393  | 1,708889961  | 0,00163 |
| ENSMUSG00000008450 | Nutf2    | -0,736679971 | 0,00163 |
| ENSMUSG00000011257 | Pabpc4   | -0,313080013 | 0,00164 |
| ENSMUSG00000025289 | Prdx4    | 1,311529994  | 0,00164 |
| ENSMUSG00000018068 | Ints2    | -1,647250056 | 0,00165 |
| ENSMUSG00000019796 | Lrp11    | -1,160069942 | 0,00165 |
| ENSMUSG00000003360 | Ddx23    | -0,355399996 | 0,00166 |
| ENSMUSG00000037474 | Dtl      | -1,610399961 | 0,00166 |
| ENSMUSG00000028800 | Hdac1    | -0,608560026 | 0,00166 |
| ENSMUSG00000047033 | Pcdhb15  | -4,861780167 | 0,00167 |
| ENSMUSG00000030342 | Cd9      | -1,271119952 | 0,00167 |
| ENSMUSG00000019945 | Cabcoco1 | 1,752359986  | 0,00167 |
| ENSMUSG00000031788 | Kifc3    | 1,113759995  | 0,00168 |
| ENSMUSG00000018965 | Ywhah    | -0,732930005 | 0,00168 |
| ENSMUSG00000026672 | Optn     | 1,022269964  | 0,00168 |
| ENSMUSG00000064602 | Snora41  | -2,217880011 | 0,00168 |
| ENSMUSG00000009863 | Sdhd     | 1,284459949  | 0,00168 |
| ENSMUSG00000027397 | Slc20a1  | -1,019680023 | 0,00169 |

|                    |               |              |         |
|--------------------|---------------|--------------|---------|
| ENSMUSG00000019942 | Cdk1          | -1,745710015 | 0,00169 |
| ENSMUSG00000034820 | Cpsf7         | -0,715680003 | 0,00169 |
| ENSMUSG00000031023 | Akip1         | 1,072720051  | 0,00169 |
| ENSMUSG00000022941 | Ripply3       | 1,342829943  | 0,00169 |
| ENSMUSG00000030470 | Csrp3         | 1,711320043  | 0,00169 |
| ENSMUSG00000057572 | Zbtb8os       | 1,185009956  | 0,00169 |
| ENSMUSG00000017718 | Afmid         | 1,850469947  | 0,00169 |
| ENSMUSG00000026009 | Icos          | 1,988759995  | 0,0017  |
| ENSMUSG00000070576 | Mn1           | 1,580139995  | 0,0017  |
| ENSMUSG00000048905 | 4930539E08Rik | 2,649549961  | 0,0017  |
| ENSMUSG00000016382 | Pls3          | -0,692250013 | 0,00171 |
| ENSMUSG00000092558 | Med20         | -0,318199992 | 0,00171 |
| ENSMUSG00000030706 | Mrpl48        | 0,918500006  | 0,00171 |
| ENSMUSG00000024392 | Bag6          | -0,424739987 | 0,00171 |
| ENSMUSG00000021451 | Sema4d        | -1,065569997 | 0,00172 |
| ENSMUSG00000019878 | Hsf2          | 0,580060005  | 0,00172 |
| ENSMUSG00000044469 | Tnfaip8l1     | 1,127020001  | 0,00172 |
| ENSMUSG00000068923 | Syt11         | -1,202139974 | 0,00172 |
| ENSMUSG00000035392 | Dennd1a       | 0,88726002   | 0,00172 |
| ENSMUSG00000031511 | Arhgef7       | -1,124109983 | 0,00173 |
| ENSMUSG00000043782 | Bicdl2        | -2,924129963 | 0,00173 |
| ENSMUSG00000038903 | Ccdc68        | -1,663599968 | 0,00173 |
| ENSMUSG00000020263 | Appl2         | -1,398530006 | 0,00173 |
| ENSMUSG00000018830 | Myh11         | -1,548169971 | 0,00174 |
| ENSMUSG00000058835 | Abi1          | -0,541400015 | 0,00174 |
| ENSMUSG00000072568 | Fam84b        | 1,394909978  | 0,00174 |
| ENSMUSG0000003420  | Fcgrt         | 1,442999959  | 0,00174 |
| ENSMUSG00000050445 | Cyp8b1        | 2,096669912  | 0,00174 |
| ENSMUSG00000014873 | Surf2         | -0,512250006 | 0,00174 |
| ENSMUSG00000056204 | Pgpep1        | 0,662109971  | 0,00175 |
| ENSMUSG00000038604 | Ripor1        | -1,107540011 | 0,00175 |
| ENSMUSG00000054892 | Txk           | -3,242880106 | 0,00176 |
| ENSMUSG00000003623 | Crot          | 1,536339998  | 0,00176 |
| ENSMUSG00000049502 | Dtx3l         | 1,521309972  | 0,00176 |
| ENSMUSG00000044042 | Fmn1          | 1,299239993  | 0,00176 |
| ENSMUSG00000067818 | Myl9          | -1,63191998  | 0,00177 |
| ENSMUSG00000029713 | Gnb2          | -0,920719981 | 0,00177 |
| ENSMUSG00000042508 | Dmtf1         | -0,798259974 | 0,00177 |
| ENSMUSG00000051212 | Gpr183        | -1,967200041 | 0,00178 |
| ENSMUSG00000050069 | Grem2         | 1,209529996  | 0,00178 |
| ENSMUSG00000000126 | Wnt9a         | -1,799589992 | 0,00178 |
| ENSMUSG00000074677 | Sirpb1c       | -1,63864994  | 0,00178 |
| ENSMUSG00000006463 | Zdhhc24       | -0,800639987 | 0,00178 |
| ENSMUSG00000052221 | Ppp1r36       | -3,285459995 | 0,00179 |
| ENSMUSG00000047654 | Tssk6         | -2,025949955 | 0,00179 |
| ENSMUSG00000031545 | Gpat4         | 0,744050026  | 0,00179 |
| ENSMUSG00000024873 | Cnih2         | -2,296530008 | 0,0018  |

|                    |           |              |         |
|--------------------|-----------|--------------|---------|
| ENSMUSG00000035964 | Tmem59l   | -5,74846983  | 0,0018  |
| ENSMUSG00000011884 | Gltpl     | -0,939419985 | 0,00181 |
| ENSMUSG00000030126 | Tmcc1     | 0,613129973  | 0,00181 |
| ENSMUSG00000028211 | Trp53inp1 | 1,020529985  | 0,00182 |
| ENSMUSG00000089942 | Pira2     | 1,949319959  | 0,00182 |
| ENSMUSG00000074682 | Zcchc3    | -1,609509945 | 0,00183 |
| ENSMUSG00000071359 | Tbpl1     | -0,719799995 | 0,00183 |
| ENSMUSG00000024414 | Mrpl27    | 1,269309998  | 0,00183 |
| ENSMUSG00000025236 | Adpgk     | -0,552489996 | 0,00184 |
| ENSMUSG00000027931 | Npr1      | 1,134490013  | 0,00184 |
| ENSMUSG00000016495 | Plgrkt    | -0,850610018 | 0,00184 |
| ENSMUSG00000052712 | BC004004  | 0,981599987  | 0,00185 |
| ENSMUSG00000075595 | Zfp652    | 0,890330017  | 0,00185 |
| ENSMUSG00000068086 | Cyp2d9    | 2,026180029  | 0,00185 |
| ENSMUSG00000062867 | Impdh2    | -0,679929972 | 0,00185 |
| ENSMUSG00000064380 | Gm26448   | -4,159470081 | 0,00186 |
| ENSMUSG00000035934 | Pknx2     | -1,976060033 | 0,00186 |
| ENSMUSG00000008429 | Herpud2   | 0,426250011  | 0,00186 |
| ENSMUSG00000023206 | Il15ra    | 1,483719945  | 0,00186 |
| ENSMUSG00000027870 | Hao2      | 2,930310011  | 0,00186 |
| ENSMUSG00000010608 | Rbm25     | -0,709510028 | 0,00186 |
| ENSMUSG00000034201 | Gas2l1    | -0,634920001 | 0,00186 |
| ENSMUSG00000020964 | Sel1l     | 0,972840011  | 0,00186 |
| ENSMUSG00000020358 | Hnrnpab   | -0,618439972 | 0,00187 |
| ENSMUSG00000021636 | Marveld2  | 1,262130022  | 0,00187 |
| ENSMUSG00000041870 | Ankrd13a  | -0,695850015 | 0,00188 |
| ENSMUSG00000046157 | Tmem229b  | -1,178560019 | 0,00188 |
| ENSMUSG00000039450 | Dcxr      | 1,91700995   | 0,00188 |
| ENSMUSG00000021302 | Ggps1     | -1,028229952 | 0,00189 |
| ENSMUSG00000016541 | Atxn10    | -0,769919991 | 0,00189 |
| ENSMUSG00000020329 | Polrmt    | 0,451400012  | 0,00189 |
| ENSMUSG00000017802 | Retreg3   | 0,477609992  | 0,0019  |
| ENSMUSG00000069825 | Gm49340   | 1,954220057  | 0,0019  |
| ENSMUSG00000038233 | Fam198a   | 2,308000088  | 0,0019  |
| ENSMUSG00000005373 | Mlxipl    | 1,963850021  | 0,0019  |
| ENSMUSG00000024176 | Sox8      | -3,548190117 | 0,00191 |
| ENSMUSG00000000530 | Acvrl1    | -0,849430025 | 0,00191 |
| ENSMUSG00000040374 | Pex2      | 0,883239985  | 0,00191 |
| ENSMUSG00000039519 | Cyp7b1    | 2,151429892  | 0,00191 |
| ENSMUSG00000028127 | Abcd3     | 1,256500006  | 0,00191 |
| ENSMUSG00000035041 | Creb3l3   | 1,743839979  | 0,00192 |
| ENSMUSG00000033209 | Ttc28     | -1,416769981 | 0,00192 |
| ENSMUSG00000030035 | Wbp1      | 0,717069983  | 0,00192 |
| ENSMUSG00000092021 | Gbp11     | 2,570120096  | 0,00192 |
| ENSMUSG00000004127 | Trmt10a   | -0,663919985 | 0,00193 |
| ENSMUSG00000042564 | Fam227a   | -2,064970016 | 0,00194 |
| ENSMUSG00000031934 | Panx1     | -1,456560016 | 0,00194 |

|                    |               |              |         |
|--------------------|---------------|--------------|---------|
| ENSMUSG00000065402 | Mir122        | 4,202139854  | 0,00194 |
| ENSMUSG00000023868 | Pde10a        | -2,16257     | 0,00194 |
| ENSMUSG00000022899 | Slc15a2       | 2,160020113  | 0,00194 |
| ENSMUSG00000023861 | Mpc1          | 1,450819969  | 0,00195 |
| ENSMUSG00000034926 | Dhcr24        | 1,576509953  | 0,00195 |
| ENSMUSG00000032342 | Mto1          | 0,674719989  | 0,00195 |
| ENSMUSG00000053334 | Ficd          | 0,858839989  | 0,00195 |
| ENSMUSG00000017344 | Vtn           | 1,778270006  | 0,00195 |
| ENSMUSG00000035403 | Crb2          | -4,098589897 | 0,00196 |
| ENSMUSG00000038827 | Fam206a       | -0,99673003  | 0,00196 |
| ENSMUSG00000064254 | Ethe1         | 1,40655005   | 0,00198 |
| ENSMUSG00000022146 | Osmr          | -1,675799966 | 0,00199 |
| ENSMUSG00000037808 | Fam76b        | -0,591409981 | 0,00199 |
| ENSMUSG00000070167 | Snora57       | -1,512629986 | 0,002   |
| ENSMUSG00000037572 | Wdhd1         | -1,408789992 | 0,002   |
| ENSMUSG00000041827 | Oasl1         | 1,098230004  | 0,002   |
| ENSMUSG00000069668 | Sult3a1       | 7,592040062  | 0,002   |
| ENSMUSG00000023224 | Serping1      | 1,443470001  | 0,00201 |
| ENSMUSG00000056201 | Cfl1          | -1,192860007 | 0,00201 |
| ENSMUSG00000024528 | Srfbp1        | -0,835099995 | 0,00201 |
| ENSMUSG00000089984 | Fbxo24        | -2,817800045 | 0,00202 |
| ENSMUSG00000020577 | Tspan13       | -1,884459972 | 0,00202 |
| ENSMUSG00000049643 | 2310022A10Rik | -0,63944     | 0,00202 |
| ENSMUSG00000040548 | Tex2          | 1,335430026  | 0,00202 |
| ENSMUSG00000062510 | Nsl1          | -1,461300015 | 0,00202 |
| ENSMUSG00000031706 | Rfx1          | -0,715900004 | 0,00202 |
| ENSMUSG00000095567 | Noc2l         | -0,759790003 | 0,00203 |
| ENSMUSG00000028266 | Lmo4          | -1,065009952 | 0,00203 |
| ENSMUSG00000036246 | Gmip          | -0,688199997 | 0,00203 |
| ENSMUSG00000010095 | Slc3a2        | -0,692080021 | 0,00204 |
| ENSMUSG00000039239 | Tgfb2         | -1,669149995 | 0,00204 |
| ENSMUSG00000011752 | Pgam1         | -1,147269964 | 0,00204 |
| ENSMUSG00000059923 | Grb2          | -0,294640005 | 0,00204 |
| ENSMUSG00000021792 | Fam213a       | 0,957560003  | 0,00204 |
| ENSMUSG00000004655 | Aqp1          | 1,086979985  | 0,00205 |
| ENSMUSG00000067235 | H2-Q10        | 1,870650053  | 0,00205 |
| ENSMUSG00000029512 | Ulk1          | 1,070700049  | 0,00205 |
| ENSMUSG00000028521 | Slc35d1       | 1,279270053  | 0,00206 |
| ENSMUSG00000021902 | Phf7          | 0,639389992  | 0,00206 |
| ENSMUSG00000044231 | Nhlrc1        | 0,887889981  | 0,00207 |
| ENSMUSG00000051674 | Dcun1d4       | 0,890030026  | 0,00208 |
| ENSMUSG00000024778 | Fas           | 1,482879996  | 0,00209 |
| ENSMUSG00000059060 | Rad51b        | -1,988800049 | 0,0021  |
| ENSMUSG00000023905 | Tnfrsf12a     | -1,178709984 | 0,0021  |
| ENSMUSG00000022883 | Robo1         | 1,413879991  | 0,0021  |
| ENSMUSG00000008734 | Gprc5b        | -1,784929991 | 0,0021  |
| ENSMUSG00000034645 | Zyg11a        | 1,950080037  | 0,00211 |

|                    |          |              |         |
|--------------------|----------|--------------|---------|
| ENSMUSG00000001127 | Araf     | 0,357749999  | 0,00211 |
| ENSMUSG00000037916 | Ndufv1   | 1,011649966  | 0,00212 |
| ENSMUSG00000040105 | Plpp6    | 0,750899971  | 0,00212 |
| ENSMUSG00000013622 | Atraid   | 1,021919966  | 0,00212 |
| ENSMUSG00000014444 | Piezo1   | -3,156080008 | 0,00212 |
| ENSMUSG00000009079 | Ewsr1    | -0,522549987 | 0,00212 |
| ENSMUSG00000030754 | Copb1    | 0,530409992  | 0,00212 |
| ENSMUSG00000034780 | B3galt1  | 1,643169999  | 0,00212 |
| ENSMUSG00000030339 | Ltbr     | 1,003280044  | 0,00213 |
| ENSMUSG00000002346 | Slc25a42 | 1,328070045  | 0,00213 |
| ENSMUSG00000025764 | Jade1    | 0,945900023  | 0,00214 |
| ENSMUSG00000056296 | Synpr    | -9,879210472 | 0,00214 |
| ENSMUSG00000043004 | Gng2     | -1,116050005 | 0,00214 |
| ENSMUSG00000003555 | Cyp17a1  | 2,710860014  | 0,00214 |
| ENSMUSG00000029101 | Rgs12    | -1,086009979 | 0,00215 |
| ENSMUSG00000060373 | Hnrnpc   | -0,49386999  | 0,00215 |
| ENSMUSG00000027715 | Ccna2    | -1,471969962 | 0,00216 |
| ENSMUSG00000059481 | Plg      | 1,888249993  | 0,00216 |
| ENSMUSG00000049598 | Vsig8    | -3,153599977 | 0,00216 |
| ENSMUSG00000059401 | Mamld1   | -1,305439949 | 0,00216 |
| ENSMUSG00000007836 | Hnrnpa0  | -0,956420004 | 0,00216 |
| ENSMUSG00000030407 | Qpctl    | 0,457199991  | 0,00217 |
| ENSMUSG00000023307 | March5   | 0,722710013  | 0,00217 |
| ENSMUSG00000026260 | Ndufa10  | 0,766690016  | 0,00217 |
| ENSMUSG00000036775 | Decr2    | 1,21528995   | 0,00217 |
| ENSMUSG00000022551 | Cyc1     | 0,579330027  | 0,00217 |
| ENSMUSG00000024378 | Stard4   | 1,11548996   | 0,00218 |
| ENSMUSG00000035642 | Aamdc    | 1,438570023  | 0,00218 |
| ENSMUSG00000038980 | Rbbp8nl  | -3,890280008 | 0,00219 |
| ENSMUSG00000038602 | Slc35f1  | -2,71984005  | 0,00219 |
| ENSMUSG00000029366 | Dck      | -0,675949991 | 0,00219 |
| ENSMUSG00000068328 | Aup1     | 0,815400004  | 0,00219 |
| ENSMUSG00000024177 | Nme4     | -1,232720017 | 0,00219 |
| ENSMUSG00000031104 | Rab33a   | -3,915669918 | 0,0022  |
| ENSMUSG00000059895 | Ptp4a3   | -1,070639968 | 0,0022  |
| ENSMUSG00000057778 | Cyb5d2   | 0,575420022  | 0,0022  |
| ENSMUSG00000026603 | Smyd2    | -0,600189984 | 0,0022  |
| ENSMUSG00000075700 | Selenot  | 0,355309993  | 0,0022  |
| ENSMUSG00000040280 | Ndufa4l2 | -1,977679968 | 0,00221 |
| ENSMUSG00000050022 | Amz1     | -1,220700026 | 0,00221 |
| ENSMUSG00000015605 | Srf      | -0,54152     | 0,00221 |
| ENSMUSG00000040009 | Gnaz     | -2,840800047 | 0,00222 |
| ENSMUSG00000026580 | Selp     | -1,857499957 | 0,00222 |
| ENSMUSG00000032586 | Traip    | -1,529129982 | 0,00222 |
| ENSMUSG00000031832 | Taf1c    | -1,209509969 | 0,00223 |
| ENSMUSG00000002771 | Grin2d   | -2,606529951 | 0,00223 |
| ENSMUSG00000037944 | Ccr7     | -2,002660036 | 0,00223 |

|                     |          |              |         |
|---------------------|----------|--------------|---------|
| ENSMUSG00000064563  | Snora7a  | -1,869619966 | 0,00224 |
| ENSMUSG00000022476  | Polr3h   | -0,728519976 | 0,00224 |
| ENSMUSG00000044328  | Trp53i13 | -1,457460046 | 0,00225 |
| ENSMUSG00000050428  | Fbxo46   | -0,723249972 | 0,00225 |
| ENSMUSG00000047867  | Gimap6   | 0,964720011  | 0,00225 |
| ENSMUSG00000016995  | Matn4    | -5,15237999  | 0,00225 |
| ENSMUSG00000053470  | Kdm3a    | -1,129469991 | 0,00226 |
| ENSMUSG00000025512  | Chid1    | 0,805779994  | 0,00226 |
| ENSMUSG00000029053  | Prkcz    | 1,129799962  | 0,00226 |
| ENSMUSG00000049439  | Cyp20a1  | -0,559279978 | 0,00226 |
| ENSMUSG00000042265  | Trem1    | -3,188780069 | 0,00227 |
| ENSMUSG00000041301  | Cftr     | -2,680540085 | 0,00227 |
| ENSMUSG00000062526  | Mppe1    | 0,994520009  | 0,00227 |
| ENSMUSG00000042213  | Zfand4   | 1,159770012  | 0,00227 |
| ENSMUSG00000021928  | Ebpl     | 1,703889966  | 0,00227 |
| ENSMUSG00000038656  | Cyp3a16  | 2,722440004  | 0,00227 |
| ENSMUSG00000037428  | Vgf      | -6,001450062 | 0,00228 |
| ENSMUSG00000034911  | Ushbp1   | 0,862839997  | 0,00228 |
| ENSMUSG00000010080  | Epn3     | -1,82525003  | 0,00228 |
| ENSMUSG00000009654  | Oit3     | 1,439460039  | 0,00228 |
| ENSMUSG00000058729  | Lin9     | -0,793250024 | 0,00229 |
| ENSMUSG00000032077  | Bud13    | -0,521799982 | 0,00229 |
| ENSMUSG00000061950  | Ppp4r1   | -0,51752001  | 0,00229 |
| ENSMUSG00000035513  | Ntng2    | -1,675629973 | 0,0023  |
| ENSMUSG00000032177  | Pde4a    | -1,336910009 | 0,0023  |
| ENSMUSG00000036528  | Ppfibp2  | 1,348659992  | 0,0023  |
| ENSMUSG00000013465  | Nelfb    | -0,404210001 | 0,0023  |
| ENSMUSG00000003309  | Ap1m2    | -2,463469982 | 0,00231 |
| ENSMUSG00000026047  | Kdelc1   | -0,558780015 | 0,00231 |
| ENSMUSG00000002227  | Mov10    | 0,897849977  | 0,00231 |
| ENSMUSG00000040229  | Gpr34    | -2,510250092 | 0,00231 |
| ENSMUSG00000021214  | Akr1c18  | 2,059390068  | 0,00232 |
| ENSMUSG00000070737  | Tmem35b  | 0,956160009  | 0,00232 |
| ENSMUSG00000059816  | Shisal2a | -6,775629997 | 0,00232 |
| ENSMUSG00000022555  | Dgat1    | -0,47183001  | 0,00233 |
| ENSMUSG00000003235  | Eif2b5   | 0,466540009  | 0,00233 |
| ENSMUSG000000030945 | Acsm2    | 1,811169982  | 0,00233 |
| ENSMUSG00000006390  | Elovl1   | 0,44047001   | 0,00233 |
| ENSMUSG00000031232  | Magt1    | 0,714919984  | 0,00233 |
| ENSMUSG00000017390  | Aldoc    | 0,886089981  | 0,00233 |
| ENSMUSG00000040028  | Elavl1   | -0,754329979 | 0,00234 |
| ENSMUSG00000006736  | Tspan31  | 1,086670041  | 0,00234 |
| ENSMUSG00000022131  | Gpr180   | 0,566340029  | 0,00235 |
| ENSMUSG00000063931  | Pepd     | 1,049430013  | 0,00235 |
| ENSMUSG00000066233  | Tmem42   | 1,152199984  | 0,00235 |
| ENSMUSG00000052584  | Serp2    | -2,657330036 | 0,00235 |
| ENSMUSG00000025104  | Hdgfl3   | -1,106739998 | 0,00235 |

|                    |           |              |         |
|--------------------|-----------|--------------|---------|
| ENSMUSG00000032313 | Tmem266   | 1,722839952  | 0,00235 |
| ENSMUSG00000040706 | Agmat     | 1,91336      | 0,00235 |
| ENSMUSG00000047109 | Cldn14    | 2,061589956  | 0,00235 |
| ENSMUSG00000084897 | Gm14226   | -4,738359928 | 0,00236 |
| ENSMUSG00000022613 | Miox      | 2,559520006  | 0,00236 |
| ENSMUSG00000073413 | Ly6g6d    | 2,601249933  | 0,00236 |
| ENSMUSG00000078768 | Zfp566    | -1,457380056 | 0,00237 |
| ENSMUSG00000029632 | Ndufa4    | 1,648589969  | 0,00237 |
| ENSMUSG00000030067 | Foxp1     | -0,918429971 | 0,00237 |
| ENSMUSG00000029647 | Pan3      | -0,784500003 | 0,00238 |
| ENSMUSG00000028910 | Mecr      | 0,919070005  | 0,00238 |
| ENSMUSG00000021403 | Serpib9b  | -4,764349937 | 0,00238 |
| ENSMUSG00000020682 | Mmp28     | -2,901489973 | 0,00238 |
| ENSMUSG00000027544 | Nfatc2    | -1,894180059 | 0,00238 |
| ENSMUSG00000002820 | Atg4d     | 0,641860008  | 0,00238 |
| ENSMUSG00000073096 | Lrrc61    | 1,015239954  | 0,00238 |
| ENSMUSG00000024335 | Brd2      | -0,443969995 | 0,0024  |
| ENSMUSG00000027952 | Pmvk      | 1,367190003  | 0,0024  |
| ENSMUSG00000025383 | Il23a     | -2,023740053 | 0,0024  |
| ENSMUSG00000034681 | Rnps1     | -1,090849996 | 0,0024  |
| ENSMUSG00000024085 | Man2a1    | 0,795430005  | 0,0024  |
| ENSMUSG00000028064 | Sema4a    | 1,429499984  | 0,0024  |
| ENSMUSG00000063760 | Rnf217    | -1,059700012 | 0,00241 |
| ENSMUSG00000032024 | Clmp      | 0,99229002   | 0,00241 |
| ENSMUSG00000052428 | Tmco1     | 0,912609994  | 0,00242 |
| ENSMUSG00000025089 | Gfra1     | 1,41940999   | 0,00243 |
| ENSMUSG00000060703 | Cd302     | 1,733770013  | 0,00243 |
| ENSMUSG00000045775 | Slc16a5   | 2,012870073  | 0,00243 |
| ENSMUSG00000024353 | Mzb1      | 2,036679983  | 0,00243 |
| ENSMUSG00000021591 | Glrx      | 0,947629988  | 0,00244 |
| ENSMUSG00000037171 | Nodal     | 2,104870081  | 0,00244 |
| ENSMUSG00000022678 | Nde1      | -0,468650013 | 0,00245 |
| ENSMUSG00000039033 | Tasp1     | 0,627110004  | 0,00245 |
| ENSMUSG00000014846 | Tppp3     | -1,863479972 | 0,00246 |
| ENSMUSG00000036737 | Oxsr1     | -0,529649973 | 0,00246 |
| ENSMUSG00000031539 | Ap3m2     | -1,143229961 | 0,00247 |
| ENSMUSG00000033287 | Kctd17    | -0,962539971 | 0,00247 |
| ENSMUSG00000043998 | Mgat2     | 0,49267      | 0,00247 |
| ENSMUSG00000004069 | Dnaja3    | 0,702040017  | 0,00247 |
| ENSMUSG00000020075 | Ddx21     | -0,670669973 | 0,00248 |
| ENSMUSG00000029458 | Brap      | 0,748130023  | 0,00249 |
| ENSMUSG00000054582 | Pabpc1l   | -2,722609997 | 0,00249 |
| ENSMUSG00000030347 | D6Wsu163e | 0,593900025  | 0,00251 |
| ENSMUSG00000052430 | Bmpr1b    | -6,312449932 | 0,00251 |
| ENSMUSG00000026834 | Acvr1c    | -5,597819805 | 0,00251 |
| ENSMUSG00000004341 | Gpx6      | 2,334959984  | 0,00251 |
| ENSMUSG00000089929 | Bcl2a1b   | -2,100699902 | 0,00252 |



|                     |          |              |         |
|---------------------|----------|--------------|---------|
| ENSMUSG00000021892  | Sh3bp5   | 1,251049995  | 0,00252 |
| ENSMUSG00000053111  | Fank1    | -3,383899927 | 0,00253 |
| ENSMUSG00000031865  | Dctn1    | -0,783219993 | 0,00253 |
| ENSMUSG00000002825  | Qtrt1    | -0,928960025 | 0,00254 |
| ENSMUSG00000018574  | Acadvl   | 1,213690042  | 0,00254 |
| ENSMUSG00000035638  | Muc20    | -3,718310118 | 0,00254 |
| ENSMUSG00000055978  | Fut2     | -3,564140081 | 0,00254 |
| ENSMUSG00000079450  | Cldn34c1 | -2,257390022 | 0,00254 |
| ENSMUSG00000025007  | Aldh18a1 | -1,348359942 | 0,00254 |
| ENSMUSG00000038005  | Hpf1     | -1,057209969 | 0,00254 |
| ENSMUSG00000028953  | Abcf2    | -0,454430014 | 0,00255 |
| ENSMUSG00000047517  | Dmbt1    | -4,883870125 | 0,00256 |
| ENSMUSG00000000223  | Drp2     | -3,1338799   | 0,00256 |
| ENSMUSG00000031916  | Cog8     | 0,488090008  | 0,00256 |
| ENSMUSG00000039474  | Wfs1     | -1,185220003 | 0,00257 |
| ENSMUSG00000026883  | Dab2ip   | -0,878709972 | 0,00257 |
| ENSMUSG00000027428  | Rbbp9    | 0,510299981  | 0,00257 |
| ENSMUSG00000035139  | Secisbp2 | 0,461100012  | 0,00258 |
| ENSMUSG00000059900  | Tmem40   | -3,727839947 | 0,00259 |
| ENSMUSG00000033014  | Trim33   | -0,923479974 | 0,00259 |
| ENSMUSG00000021597  | Slf1     | -0,759949982 | 0,00259 |
| ENSMUSG00000001847  | Rac1     | -0,650030017 | 0,00259 |
| ENSMUSG00000078676  | Casc3    | -0,531449974 | 0,00259 |
| ENSMUSG00000002799  | Jag2     | -2,335380077 | 0,0026  |
| ENSMUSG00000042182  | Bend6    | -2,988369942 | 0,0026  |
| ENSMUSG000000064267 | Hvcn1    | -1,083019972 | 0,0026  |
| ENSMUSG00000041459  | Tardbp   | -0,550530016 | 0,0026  |
| ENSMUSG00000027305  | Ndufaf1  | 0,930329978  | 0,0026  |
| ENSMUSG00000020988  | L2hgdh   | 1,053910017  | 0,00261 |
| ENSMUSG00000062960  | Kdr      | 1,211269975  | 0,00261 |
| ENSMUSG00000033276  | Stk36    | -1,891450047 | 0,00261 |
| ENSMUSG00000021177  | Tdp1     | -0,780809999 | 0,00261 |
| ENSMUSG00000026213  | Stk11ip  | -0,680899978 | 0,00261 |
| ENSMUSG00000001334  | Fndc5    | -1,870419979 | 0,00262 |
| ENSMUSG00000015354  | Pcolce2  | -1,748870015 | 0,00262 |
| ENSMUSG00000030110  | Ret      | -8,514399529 | 0,00263 |
| ENSMUSG00000030327  | Necap1   | 0,547800004  | 0,00264 |
| ENSMUSG00000068876  | Cgn      | 1,612149954  | 0,00264 |
| ENSMUSG00000041417  | Pik3r1   | 0,50395      | 0,00265 |
| ENSMUSG00000035969  | Rusc2    | -1,109050035 | 0,00266 |
| ENSMUSG00000000568  | Hnrnpd   | -0,654150009 | 0,00266 |
| ENSMUSG00000032382  | Snx1     | -0,62984997  | 0,00266 |
| ENSMUSG00000030278  | Cidec    | 1,930410028  | 0,00266 |
| ENSMUSG00000029708  | Gcc1     | 0,471740007  | 0,00266 |
| ENSMUSG00000002332  | Dhrs1    | 0,939939976  | 0,00266 |
| ENSMUSG00000029599  | Ddx54    | -0,509090006 | 0,00267 |
| ENSMUSG00000029254  | Stap1    | 2,173079967  | 0,00267 |

|                    |          |              |         |
|--------------------|----------|--------------|---------|
| ENSMUSG00000009470 | Tnpo1    | -0,738049984 | 0,00268 |
| ENSMUSG00000022035 | Ccdc25   | 0,617709994  | 0,00268 |
| ENSMUSG00000023942 | Slc29a1  | 0,829249978  | 0,00269 |
| ENSMUSG00000047281 | Sfn      | -1,56558001  | 0,0027  |
| ENSMUSG00000049928 | Glp2r    | 3,065720081  | 0,0027  |
| ENSMUSG00000028597 | Gpx7     | -1,450500011 | 0,0027  |
| ENSMUSG00000032419 | Tbx18    | -9,841810226 | 0,00271 |
| ENSMUSG00000026480 | Ncf2     | -1,220729947 | 0,00272 |
| ENSMUSG00000002014 | Ssr4     | 0,891340017  | 0,00272 |
| ENSMUSG00000045659 | Plekha7  | 1,322399974  | 0,00272 |
| ENSMUSG00000038009 | Dnajc22  | 1,448580027  | 0,00272 |
| ENSMUSG00000025958 | Creb1    | -0,649269998 | 0,00272 |
| ENSMUSG00000048429 | Timm29   | 0,382470012  | 0,00273 |
| ENSMUSG00000048728 | Zfp454   | 1,777999997  | 0,00273 |
| ENSMUSG00000058173 | Smco4    | 1,349449992  | 0,00273 |
| ENSMUSG00000054764 | Mtnr1a   | 2,304440022  | 0,00273 |
| ENSMUSG00000045273 | Cenph    | -2,022190094 | 0,00274 |
| ENSMUSG00000051246 | Msantd1  | -1,90407002  | 0,00274 |
| ENSMUSG00000019791 | Hint3    | 1,41418004   | 0,00274 |
| ENSMUSG00000066705 | Fxyd6    | -2,192169905 | 0,00274 |
| ENSMUSG00000020801 | Med31    | -1,25988996  | 0,00274 |
| ENSMUSG00000031864 | Ints10   | -0,714160025 | 0,00274 |
| ENSMUSG00000033610 | Pank1    | 1,559559941  | 0,00274 |
| ENSMUSG00000063354 | Slc39a4  | 1,593000054  | 0,00274 |
| ENSMUSG00000025993 | Slc40a1  | 1,207129955  | 0,00275 |
| ENSMUSG00000037034 | Pax1     | -5,169690132 | 0,00276 |
| ENSMUSG00000019806 | Aig1     | -1,060969949 | 0,00276 |
| ENSMUSG00000092920 | Mirt2    | 2,093139887  | 0,00276 |
| ENSMUSG00000032407 | U2surp   | -0,529999971 | 0,00276 |
| ENSMUSG00000026589 | Sec16b   | 1,794870019  | 0,00276 |
| ENSMUSG00000031626 | Sorbs2   | 1,321730018  | 0,00277 |
| ENSMUSG00000024866 | Acy3     | 1,745470047  | 0,00277 |
| ENSMUSG00000031622 | Sin3b    | -1,343240023 | 0,00277 |
| ENSMUSG00000038615 | Nfe2l1   | -0,499370009 | 0,00277 |
| ENSMUSG00000028789 | Azin2    | -1,741639972 | 0,00278 |
| ENSMUSG00000038618 | Rassf7   | 0,961070001  | 0,00278 |
| ENSMUSG00000019831 | Wasf1    | -1,162539959 | 0,00279 |
| ENSMUSG00000039005 | Tlr4     | -0,931360006 | 0,00279 |
| ENSMUSG00000028693 | Nasp     | -0,833530009 | 0,00279 |
| ENSMUSG00000040653 | Ppp1r14c | -10,13564014 | 0,0028  |
| ENSMUSG00000063590 | Slc22a28 | 2,42888999   | 0,0028  |
| ENSMUSG00000034486 | Gbx2     | -7,135749817 | 0,0028  |
| ENSMUSG00000039942 | Ptger4   | -1,461490035 | 0,0028  |
| ENSMUSG00000028618 | Tmem59   | 0,580879986  | 0,0028  |
| ENSMUSG00000079494 | Nat8f5   | 2,812510014  | 0,00281 |
| ENSMUSG00000021287 | Xrcc3    | -1,368950009 | 0,00282 |
| ENSMUSG00000005442 | Cic      | -0,95431     | 0,00282 |

|                    |               |              |         |
|--------------------|---------------|--------------|---------|
| ENSMUSG00000006740 | Kif5b         | -0,915830016 | 0,00282 |
| ENSMUSG00000028292 | Rars2         | 0,506799996  | 0,00282 |
| ENSMUSG00000042055 | Wdr11         | 0,571759999  | 0,00283 |
| ENSMUSG00000034341 | Wbp2          | 0,291999996  | 0,00283 |
| ENSMUSG00000030780 | BC017158      | 1,047170043  | 0,00283 |
| ENSMUSG00000041144 | Dnah7b        | -3,42711997  | 0,00284 |
| ENSMUSG00000029127 | Zbtb49        | -0,964049995 | 0,00284 |
| ENSMUSG00000031505 | Naxd          | 0,811689973  | 0,00285 |
| ENSMUSG00000040877 | Wdr25         | 0,656840026  | 0,00286 |
| ENSMUSG00000046985 | Tapt1         | 0,628350019  | 0,00286 |
| ENSMUSG00000029147 | Ppm1g         | -0,499240011 | 0,00287 |
| ENSMUSG00000032741 | Tpcn1         | -0,932510018 | 0,00288 |
| ENSMUSG00000052557 | Gan           | -1,892359972 | 0,00288 |
| ENSMUSG00000072704 | Smim10l1      | 0,921249986  | 0,00288 |
| ENSMUSG00000031391 | L1cam         | -3,146780014 | 0,00289 |
| ENSMUSG00000004207 | Psap          | -0,600920022 | 0,0029  |
| ENSMUSG00000022219 | Cideb         | 1,782179952  | 0,0029  |
| ENSMUSG00000030144 | Clec4d        | -2,641669989 | 0,0029  |
| ENSMUSG00000071042 | Rasgrp3       | -1,040799975 | 0,0029  |
| ENSMUSG00000039989 | Cbx4          | 0,591250002  | 0,0029  |
| ENSMUSG00000092416 | Zfp141        | 0,534240007  | 0,00291 |
| ENSMUSG00000036966 | Spryd3        | -0,573920012 | 0,00291 |
| ENSMUSG00000078798 | Sult2a1       | 3,83513999   | 0,00291 |
| ENSMUSG00000077734 | Snord83b      | -2,931139946 | 0,00292 |
| ENSMUSG00000000869 | Il4           | -1,976709962 | 0,00292 |
| ENSMUSG00000031155 | Pim2          | -0,988099992 | 0,00292 |
| ENSMUSG00000022223 | Sdr39u1       | 0,477050006  | 0,00292 |
| ENSMUSG00000026304 | Rab17         | 1,643820047  | 0,00292 |
| ENSMUSG00000092035 | Peg10         | -1,711699963 | 0,00294 |
| ENSMUSG00000024258 | Polr2d        | -1,303529978 | 0,00294 |
| ENSMUSG00000074259 | Gramd2        | -3,764489889 | 0,00295 |
| ENSMUSG00000060550 | H2-Q7         | 1,439939976  | 0,00295 |
| ENSMUSG00000041079 | Rwdd2b        | 0,842320025  | 0,00296 |
| ENSMUSG00000078570 | 1110065P20Rik | 1,006469965  | 0,00296 |
| ENSMUSG00000052296 | Ppp6r1        | 0,644819975  | 0,00296 |
| ENSMUSG00000037353 | Letmd1        | 0,404029995  | 0,00297 |
| ENSMUSG00000025151 | Maged1        | -0,390709996 | 0,00297 |
| ENSMUSG00000051910 | Sox6          | 1,648200035  | 0,00298 |
| ENSMUSG00000015133 | Lrrk1         | -0,897790015 | 0,00298 |
| ENSMUSG00000030621 | Me3           | -2,838089943 | 0,00299 |
| ENSMUSG00000027245 | Hypk          | -1,408980012 | 0,00299 |
| ENSMUSG00000022696 | Sidt1         | 2,300829887  | 0,00299 |
| ENSMUSG00000044338 | Aplnr         | -2,88973999  | 0,003   |
| ENSMUSG00000028337 | Coro2a        | -1,465790033 | 0,003   |
| ENSMUSG00000038357 | Camp          | -5,22533989  | 0,00301 |
| ENSMUSG00000027763 | Mbnl1         | 0,430920005  | 0,00301 |
| ENSMUSG00000029376 | Mthfd2l       | -1,123039961 | 0,00302 |

|                    |           |              |         |
|--------------------|-----------|--------------|---------|
| ENSMUSG00000003814 | Calr      | 0,551289976  | 0,00302 |
| ENSMUSG00000008575 | Nfib      | 0,929650009  | 0,00302 |
| ENSMUSG00000028289 | Epha7     | -1,414520025 | 0,00302 |
| ENSMUSG00000048782 | Insc      | 1,828609943  | 0,00302 |
| ENSMUSG00000031145 | Prickle3  | -1,053869963 | 0,00303 |
| ENSMUSG00000024905 | Tesmin    | 1,378340006  | 0,00303 |
| ENSMUSG00000038354 | Ankrd35   | -3,216779947 | 0,00303 |
| ENSMUSG00000034607 | Pof1b     | -2,814280033 | 0,00304 |
| ENSMUSG00000068922 | Msto1     | -0,670840025 | 0,00304 |
| ENSMUSG00000030509 | Asb7      | 0,326299995  | 0,00304 |
| ENSMUSG00000049625 | Tifab     | -1,055840015 | 0,00305 |
| ENSMUSG00000030074 | Gxylt2    | -3,203949928 | 0,00305 |
| ENSMUSG00000037025 | Foxa2     | 1,149420023  | 0,00306 |
| ENSMUSG00000030972 | Acsn5     | 2,030080008  | 0,00306 |
| ENSMUSG00000035824 | Tk2       | 0,627099991  | 0,00306 |
| ENSMUSG00000023345 | Poc1a     | -0,794610023 | 0,00306 |
| ENSMUSG00000024943 | Smc5      | -0,678550005 | 0,00306 |
| ENSMUSG00000037553 | Zdhc18    | 0,412369996  | 0,00306 |
| ENSMUSG00000021400 | Wrnip1    | 0,548420012  | 0,00306 |
| ENSMUSG00000031198 | Fundc2    | -1,015580058 | 0,00307 |
| ENSMUSG00000005823 | Gpr108    | -0,420870006 | 0,00307 |
| ENSMUSG00000069049 | Eif2s3y   | 0,62331003   | 0,00307 |
| ENSMUSG00000042207 | Kdm5b     | -0,915120006 | 0,00308 |
| ENSMUSG00000047879 | Usp14     | -0,459340006 | 0,00308 |
| ENSMUSG00000002748 | Baz1b     | -0,646740019 | 0,00308 |
| ENSMUSG00000040943 | Tet2      | -1,689249992 | 0,00308 |
| ENSMUSG00000025785 | Exosc7    | 0,875540018  | 0,00309 |
| ENSMUSG00000043415 | Otud1     | -0,649800003 | 0,0031  |
| ENSMUSG00000046269 | Usp27x    | -1,308840036 | 0,0031  |
| ENSMUSG00000038375 | Trp53inp2 | 0,634259999  | 0,0031  |
| ENSMUSG00000030200 | Bcl2l14   | 1,75838995   | 0,00311 |
| ENSMUSG00000020873 | Slc35b1   | 0,751339972  | 0,00311 |
| ENSMUSG00000020692 | Nle1      | -0,713549972 | 0,00312 |
| ENSMUSG00000028919 | Arhgef19  | 0,763029993  | 0,00312 |
| ENSMUSG00000027489 | Necab3    | -3,132509947 | 0,00312 |
| ENSMUSG00000021010 | Npas3     | -3,359440088 | 0,00313 |
| ENSMUSG00000004054 | Map3k11   | 0,220300004  | 0,00313 |
| ENSMUSG00000025790 | Slco3a1   | -1,037999988 | 0,00313 |
| ENSMUSG00000005534 | Insr      | 1,021379948  | 0,00313 |
| ENSMUSG00000022949 | Clic6     | -3,68640995  | 0,00314 |
| ENSMUSG00000013787 | Ehmt2     | -0,444840014 | 0,00314 |
| ENSMUSG00000005547 | Cyp2a5    | 2,56994009   | 0,00314 |
| ENSMUSG00000000690 | Hoxb6     | -3,192100048 | 0,00314 |
| ENSMUSG00000049295 | Zfp219    | -0,592149973 | 0,00315 |
| ENSMUSG00000041237 | Pklr      | 2,214080095  | 0,00316 |
| ENSMUSG00000024491 | Rbm27     | -0,743629992 | 0,00317 |
| ENSMUSG00000031974 | Abcb10    | 0,783810019  | 0,00317 |

|                    |         |              |         |
|--------------------|---------|--------------|---------|
| ENSMUSG00000057329 | Bcl2    | -1,473770022 | 0,00318 |
| ENSMUSG00000068742 | Cry2    | 0,779280007  | 0,00319 |
| ENSMUSG00000022829 | Stxbp5l | 4,295199871  | 0,00319 |
| ENSMUSG00000041891 | Lman1   | 0,968230009  | 0,00319 |
| ENSMUSG00000050930 | Map10   | -1,327559948 | 0,0032  |
| ENSMUSG00000049001 | Ndnf    | -7,498209953 | 0,00321 |
| ENSMUSG00000057880 | Abat    | 1,930330038  | 0,00321 |
| ENSMUSG00000002372 | Ranbp3  | -0,523419976 | 0,00322 |
| ENSMUSG00000019854 | Reps1   | -0,722750008 | 0,00323 |
| ENSMUSG00000014767 | Tbp     | -0,45273     | 0,00323 |
| ENSMUSG00000020594 | Pum2    | -0,625739992 | 0,00324 |
| ENSMUSG00000003452 | Bicd1   | -2,147259951 | 0,00324 |
| ENSMUSG00000042787 | Exog    | -0,943099976 | 0,00325 |
| ENSMUSG00000024747 | Aldh1a7 | 1,597409964  | 0,00326 |
| ENSMUSG00000087141 | Plcxd2  | 1,613250017  | 0,00326 |
| ENSMUSG00000026816 | Gtf3c5  | -0,656050026 | 0,00326 |
| ENSMUSG00000029063 | Nadk    | 0,568560004  | 0,00327 |
| ENSMUSG00000026269 | Rnpepl1 | 0,514159977  | 0,00328 |
| ENSMUSG00000027316 | Gfra4   | -3,026410103 | 0,00329 |
| ENSMUSG00000026687 | Aldh9a1 | 1,279270053  | 0,00329 |
| ENSMUSG00000028718 | Stil    | -2,14267993  | 0,0033  |
| ENSMUSG00000020994 | Pnn     | -1,030140042 | 0,00331 |
| ENSMUSG00000026791 | Slc2a8  | 0,562349975  | 0,00332 |
| ENSMUSG00000079508 | Apoo    | 0,966960013  | 0,00332 |
| ENSMUSG00000073234 | Gm8773  | -4,695940018 | 0,00333 |
| ENSMUSG00000040536 | Necab1  | 2,017659903  | 0,00333 |
| ENSMUSG00000022758 | P2rx6   | -2,170969963 | 0,00334 |
| ENSMUSG00000025791 | Pgm1    | 0,623510003  | 0,00334 |
| ENSMUSG00000022184 | Fbxo4   | 0,659420013  | 0,00334 |
| ENSMUSG00000057967 | Fgf18   | -5,281690121 | 0,00334 |
| ENSMUSG00000039629 | Strip2  | -2,185230017 | 0,00334 |
| ENSMUSG00000001964 | Emd     | -0,604770005 | 0,00334 |
| ENSMUSG00000074030 | Exoc8   | -0,379970014 | 0,00334 |
| ENSMUSG00000026723 | Trdmt1  | 0,791220009  | 0,00334 |
| ENSMUSG00000041143 | Tmco4   | 0,845619977  | 0,00334 |
| ENSMUSG00000022236 | Ropn1l  | 1,756330013  | 0,00334 |
| ENSMUSG00000023951 | Vegfa   | -1,115630031 | 0,00335 |
| ENSMUSG00000039206 | Daglb   | 0,804069996  | 0,00335 |
| ENSMUSG00000063480 | Snu13   | -0,865199983 | 0,00335 |
| ENSMUSG00000045555 | Mettl24 | -3,802580118 | 0,00336 |
| ENSMUSG00000031833 | Mast3   | -1,195490003 | 0,00337 |
| ENSMUSG00000037149 | Ddx1    | 0,286680013  | 0,00337 |
| ENSMUSG00000073481 | Marc2   | 1,601819992  | 0,00337 |
| ENSMUSG00000001103 | Sebox   | 2,209719896  | 0,00337 |
| ENSMUSG00000073409 | H2-Q6   | 1,373749971  | 0,00338 |
| ENSMUSG00000041617 | Ccdc74a | -2,206680059 | 0,00338 |
| ENSMUSG00000069495 | Epc2    | -0,687070012 | 0,00339 |

|                    |         |              |         |
|--------------------|---------|--------------|---------|
| ENSMUSG00000018459 | Slc13a3 | 1,509729981  | 0,00339 |
| ENSMUSG00000028341 | Nr4a3   | -2,745369911 | 0,0034  |
| ENSMUSG00000022353 | Mtss1   | 0,796010017  | 0,0034  |
| ENSMUSG00000021464 | Ror2    | -5,659969807 | 0,00341 |
| ENSMUSG00000041556 | Fbxo2   | -2,070729971 | 0,00341 |
| ENSMUSG00000025759 | Mfsd8   | 0,594389975  | 0,00341 |
| ENSMUSG00000029524 | Sirt4   | 0,640990019  | 0,00342 |
| ENSMUSG00000052915 | Msl1    | -0,366820008 | 0,00342 |
| ENSMUSG00000002204 | Napsa   | -1,815840006 | 0,00343 |
| ENSMUSG00000028962 | Slc4a2  | -0,703320026 | 0,00343 |
| ENSMUSG00000053119 | Chmp3   | 0,369120002  | 0,00343 |
| ENSMUSG00000079427 | Mthfsl  | 0,980449975  | 0,00345 |
| ENSMUSG00000008461 | Fut1    | 2,063250065  | 0,00347 |
| ENSMUSG00000035773 | Kiss1r  | -1,271620035 | 0,00347 |
| ENSMUSG00000012819 | Cdh23   | -2,704590082 | 0,00348 |
| ENSMUSG00000030159 | Clec1b  | 1,690009952  | 0,00348 |
| ENSMUSG00000029208 | Guf1    | 0,318610013  | 0,00349 |
| ENSMUSG00000038128 | Camk4   | -1,735409975 | 0,0035  |
| ENSMUSG00000027634 | Ndr3    | -0,609440029 | 0,00352 |
| ENSMUSG00000027765 | P2ry1   | 0,934520006  | 0,00353 |
| ENSMUSG00000050052 | Tdrp    | 1,236879945  | 0,00353 |
| ENSMUSG00000038696 | Mapkap1 | 0,43520999   | 0,00354 |
| ENSMUSG0000002763  | Pex6    | 1,034070015  | 0,00354 |
| ENSMUSG00000017499 | Cdc6    | -1,75443995  | 0,00355 |
| ENSMUSG00000029110 | Rnf4    | -0,326020002 | 0,00356 |
| ENSMUSG00000034801 | Sos2    | -0,73180002  | 0,00357 |
| ENSMUSG00000000811 | Txnrd3  | -0,787129998 | 0,00357 |
| ENSMUSG00000039018 | Mtg1    | 0,883040011  | 0,00357 |
| ENSMUSG00000023829 | Slc22a1 | 1,803079963  | 0,00357 |
| ENSMUSG00000045751 | Mms22l  | -0,959169984 | 0,00358 |
| ENSMUSG00000036504 | Phpt1   | -1,515439987 | 0,0036  |
| ENSMUSG00000027599 | Armc1   | 0,386059999  | 0,0036  |
| ENSMUSG00000058761 | Rnf169  | 0,711880028  | 0,0036  |
| ENSMUSG00000061132 | Blnk    | 1,257730007  | 0,0036  |
| ENSMUSG00000029587 | Zfp12   | -0,690100014 | 0,0036  |
| ENSMUSG00000045064 | Zc2hc1c | 0,769320011  | 0,0036  |
| ENSMUSG00000022015 | Tnfsf11 | -4,959799767 | 0,00361 |
| ENSMUSG00000027203 | Dut     | -1,297970057 | 0,00361 |
| ENSMUSG00000024843 | Chka    | 1,698899984  | 0,00362 |
| ENSMUSG00000024045 | Akap8   | -0,612399995 | 0,00362 |
| ENSMUSG00000026116 | Tmem131 | -0,92031002  | 0,00363 |
| ENSMUSG00000028273 | Pdlim5  | -0,831019998 | 0,00364 |
| ENSMUSG00000027086 | Fastkd1 | 0,673810005  | 0,00364 |
| ENSMUSG00000032604 | Qars    | -0,356770009 | 0,00365 |
| ENSMUSG00000044788 | Fads6   | 1,717290044  | 0,00366 |
| ENSMUSG00000069255 | Dusp22  | 0,939400017  | 0,00367 |
| ENSMUSG00000040432 | Ltb4r2  | 1,771039963  | 0,00367 |

|                    |          |              |         |
|--------------------|----------|--------------|---------|
| ENSMUSG00000043789 | Vwce     | 1,673410058  | 0,00368 |
| ENSMUSG00000036432 | Siah2    | 0,693170011  | 0,00369 |
| ENSMUSG00000047822 | Angptl8  | 2,298180103  | 0,00369 |
| ENSMUSG00000035062 | Zc4h2    | -1,180230021 | 0,0037  |
| ENSMUSG00000020844 | Nxn      | -1,018260002 | 0,0037  |
| ENSMUSG00000035273 | Hpse     | -0,865260005 | 0,0037  |
| ENSMUSG00000074676 | Foxs1    | -1,779189944 | 0,00371 |
| ENSMUSG00000069844 | Sco1     | 0,517939985  | 0,00371 |
| ENSMUSG00000029060 | Mib2     | 0,327650011  | 0,00371 |
| ENSMUSG00000025350 | Rdh5     | 1,266589999  | 0,00371 |
| ENSMUSG00000055538 | Zcchc24  | 0,769739985  | 0,00372 |
| ENSMUSG00000014907 | Naf1     | -0,678499997 | 0,00373 |
| ENSMUSG00000027668 | Mfn1     | 0,393559992  | 0,00373 |
| ENSMUSG00000026659 | Dusp12   | 0,832220018  | 0,00373 |
| ENSMUSG00000027901 | Dennd2d  | 1,132629991  | 0,00373 |
| ENSMUSG00000045822 | Zswim3   | -0,975120008 | 0,00374 |
| ENSMUSG00000022026 | Olfm4    | -3,972009897 | 0,00374 |
| ENSMUSG00000031285 | Dcx      | 3,495399952  | 0,00374 |
| ENSMUSG00000030643 | Rab30    | 1,122689962  | 0,00375 |
| ENSMUSG00000025950 | Idh1     | 1,126979947  | 0,00375 |
| ENSMUSG00000036687 | Tmem184a | 1,297719955  | 0,00377 |
| ENSMUSG00000059436 | Max      | -0,756079972 | 0,00377 |
| ENSMUSG00000060152 | Pop5     | 1,320520043  | 0,00377 |
| ENSMUSG00000044244 | Il20rb   | -1,514449954 | 0,00378 |
| ENSMUSG00000027620 | Rbm39    | -0,38440001  | 0,00378 |
| ENSMUSG00000057858 | Fam204a  | -0,776650012 | 0,00379 |
| ENSMUSG00000030966 | Trim21   | 0,934499979  | 0,00379 |
| ENSMUSG00000040170 | Fmo2     | 2,008719921  | 0,00379 |
| ENSMUSG00000030483 | Cyp2b10  | 2,446010113  | 0,00379 |
| ENSMUSG00000022325 | Pop1     | -0,812259972 | 0,0038  |
| ENSMUSG00000024526 | Cidea    | -2,271100044 | 0,0038  |
| ENSMUSG00000044807 | Zfp354c  | -1,897469997 | 0,00382 |
| ENSMUSG00000033502 | Cdc14a   | -1,166450024 | 0,00382 |
| ENSMUSG00000025982 | Sf3b1    | -0,553489983 | 0,00382 |
| ENSMUSG00000073792 | Alg6     | 0,53648001   | 0,00382 |
| ENSMUSG00000048330 | Ric3     | -1,549579978 | 0,00383 |
| ENSMUSG00000071662 | Polr2g   | -1,249969959 | 0,00384 |
| ENSMUSG00000058186 | Zfp980   | 3,711980104  | 0,00384 |
| ENSMUSG00000030127 | Cops7a   | 0,319460005  | 0,00385 |
| ENSMUSG00000074570 | Cass4    | -2,693660021 | 0,00386 |
| ENSMUSG00000028393 | Alad     | 1,584540009  | 0,00386 |
| ENSMUSG00000026568 | Mpc2     | 1,886849999  | 0,00386 |
| ENSMUSG00000076617 | Ighm     | 1,591609955  | 0,00387 |
| ENSMUSG00000030431 | Tmem238  | 1,736170053  | 0,00387 |
| ENSMUSG00000038214 | Bend3    | -0,574750006 | 0,00389 |
| ENSMUSG00000062593 | Gm49339  | -0,869759977 | 0,0039  |
| ENSMUSG00000048347 | Pcdhb18  | -3,416610003 | 0,00391 |



|                    |          |              |         |
|--------------------|----------|--------------|---------|
| ENSMUSG00000026617 | Bpnt1    | 0,631410003  | 0,00391 |
| ENSMUSG00000038084 | Opa1     | 0,703589976  | 0,00391 |
| ENSMUSG00000057074 | Ces1g    | 1,757869959  | 0,00391 |
| ENSMUSG00000031481 | Tpte     | 2,358959913  | 0,00391 |
| ENSMUSG00000096546 | Smlr1    | 1,950369954  | 0,00392 |
| ENSMUSG00000020435 | Osbp2    | -2,260740042 | 0,00393 |
| ENSMUSG00000030824 | Nucb1    | 0,497460008  | 0,00393 |
| ENSMUSG00000035270 | Impg2    | 1,698799968  | 0,00393 |
| ENSMUSG00000041660 | Bbox1    | 1,799119949  | 0,00394 |
| ENSMUSG00000062949 | Atp11c   | 1,34363997   | 0,00395 |
| ENSMUSG00000015776 | Med22    | -0,557389975 | 0,00395 |
| ENSMUSG00000020884 | Asgr1    | 1,804370046  | 0,00396 |
| ENSMUSG00000030528 | Blm      | -1,00909996  | 0,00396 |
| ENSMUSG00000050122 | Vwa3b    | 1,689579964  | 0,00397 |
| ENSMUSG00000025260 | Hsd17b10 | 1,207149982  | 0,00397 |
| ENSMUSG00000062937 | Mtap     | -0,461080015 | 0,00397 |
| ENSMUSG00000038403 | Hfe2     | 1,675559998  | 0,00397 |
| ENSMUSG00000039117 | Taf4     | -0,441689998 | 0,00398 |
| ENSMUSG00000068747 | Sort1    | 1,247949958  | 0,00398 |
| ENSMUSG00000022365 | Der1     | 0,656470001  | 0,00398 |
| ENSMUSG00000063704 | Mapk15   | 1,404539943  | 0,00398 |
| ENSMUSG00000078651 | Aoc2     | -1,52252996  | 0,00399 |
| ENSMUSG00000028161 | Ppp3ca   | -0,839850008 | 0,004   |
| ENSMUSG00000035561 | Aldh1b1  | 1,764660001  | 0,004   |
| ENSMUSG00000029032 | Arhgef16 | 1,112040043  | 0,00401 |
| ENSMUSG00000034724 | Cnot6l   | 0,66049999   | 0,00401 |
| ENSMUSG00000022849 | Hspbap1  | 0,711629987  | 0,00402 |
| ENSMUSG00000053774 | Ubxn7    | -0,546530008 | 0,00403 |
| ENSMUSG00000048058 | Ldlrad3  | 0,888080001  | 0,00403 |
| ENSMUSG00000021388 | Aspn     | -4,283400059 | 0,00404 |
| ENSMUSG00000068686 | Cd59b    | 1,269279957  | 0,00404 |
| ENSMUSG00000060560 | Ces4a    | 2,714139938  | 0,00405 |
| ENSMUSG00000038943 | Prc1     | -1,620489955 | 0,00405 |
| ENSMUSG00000023367 | Tmem176a | 1,358260036  | 0,00406 |
| ENSMUSG00000032068 | Plet1    | -1,42335999  | 0,00407 |
| ENSMUSG00000032123 | Dpagt1   | 0,563530028  | 0,00409 |
| ENSMUSG00000037049 | Smpd1    | 0,630599976  | 0,00409 |
| ENSMUSG00000026944 | Abca2    | 1,136669993  | 0,00409 |
| ENSMUSG00000049422 | Chchd10  | 1,71528995   | 0,0041  |
| ENSMUSG00000036676 | Tmtc3    | -1,202859998 | 0,00411 |
| ENSMUSG00000034997 | Htr2a    | -7,91091013  | 0,00412 |
| ENSMUSG00000038024 | Dennd4c  | 1,162299991  | 0,00413 |
| ENSMUSG00000028576 | Ift74    | -0,884679973 | 0,00414 |
| ENSMUSG00000033065 | Pfkm     | -0,601429999 | 0,00414 |
| ENSMUSG00000025732 | Mcrip2   | 1,50988996   | 0,00415 |
| ENSMUSG00000028629 | Exo5     | -0,754559994 | 0,00417 |
| ENSMUSG00000014601 | Strip1   | -0,617739975 | 0,00418 |

|                    |          |              |         |
|--------------------|----------|--------------|---------|
| ENSMUSG00000078765 | U2af1l4  | 0,407440007  | 0,00418 |
| ENSMUSG00000033948 | Zswim5   | 1,185559988  | 0,00418 |
| ENSMUSG00000096370 | Gm21992  | -3,002599955 | 0,00419 |
| ENSMUSG00000050017 | Pitpnb   | 0,345459998  | 0,00419 |
| ENSMUSG00000022372 | Sla      | -1,194460034 | 0,00419 |
| ENSMUSG00000049092 | Gpr137c  | -2,884180069 | 0,0042  |
| ENSMUSG00000031723 | Txn14b   | 0,943639994  | 0,0042  |
| ENSMUSG00000035486 | Plk5     | 1,599519968  | 0,0042  |
| ENSMUSG00000001105 | lft20    | 0,795210004  | 0,00422 |
| ENSMUSG00000031604 | Msmo1    | 1,060230017  | 0,00422 |
| ENSMUSG00000064741 | Snord14a | -3,703380108 | 0,00423 |
| ENSMUSG00000070371 | Prss36   | 0,852289975  | 0,00424 |
| ENSMUSG00000006235 | Epor     | 1,273200035  | 0,00424 |
| ENSMUSG00000027107 | Chrna1   | -12,24732018 | 0,00424 |
| ENSMUSG00000060860 | Ube2s    | -1,207700014 | 0,00425 |
| ENSMUSG00000046718 | Bst2     | 1,703850031  | 0,00425 |
| ENSMUSG00000038721 | Hoxb7    | -3,138390064 | 0,00425 |
| ENSMUSG00000050321 | Neto1    | 3,139209986  | 0,00427 |
| ENSMUSG00000022092 | Ppp3cc   | -1,01225996  | 0,00427 |
| ENSMUSG00000031441 | Atp11a   | -1,501189947 | 0,00428 |
| ENSMUSG00000021127 | Zfp36l1  | 1,093999982  | 0,00428 |
| ENSMUSG00000022032 | Scara5   | -1,789610028 | 0,00429 |
| ENSMUSG00000021367 | Edn1     | -1,468840003 | 0,00429 |
| ENSMUSG00000025781 | Atp5c1   | 0,703199983  | 0,0043  |
| ENSMUSG00000016619 | Nup50    | -0,459060013 | 0,00431 |
| ENSMUSG00000032579 | Hemk1    | 1,041749954  | 0,00432 |
| ENSMUSG0000003070  | Efna2    | -2,371629953 | 0,00432 |
| ENSMUSG00000066861 | Oas1g    | 1,516639948  | 0,00432 |
| ENSMUSG00000060188 | Cxcl17   | 1,97160995   | 0,00433 |
| ENSMUSG00000020366 | Mapk9    | 0,620079994  | 0,00434 |
| ENSMUSG00000033730 | Egr3     | -5,824920177 | 0,00435 |
| ENSMUSG00000031592 | Pcm1     | -1,001610041 | 0,00435 |
| ENSMUSG00000029152 | Ociad1   | 0,389530003  | 0,00435 |
| ENSMUSG00000014177 | Tvp23b   | 0,590160012  | 0,00435 |
| ENSMUSG00000018387 | Shroom1  | 1,102699995  | 0,00435 |
| ENSMUSG00000057147 | Dph6     | -0,999719977 | 0,00435 |
| ENSMUSG00000028845 | Tekt2    | -2,526560068 | 0,00436 |
| ENSMUSG00000022587 | Ly6e     | 1,217309952  | 0,00436 |
| ENSMUSG00000039783 | Kmo      | 1,641690016  | 0,00437 |
| ENSMUSG00000000934 | Top1mt   | 0,591400027  | 0,00437 |
| ENSMUSG00000046679 | C87436   | 0,394829988  | 0,00438 |
| ENSMUSG00000036611 | Eepd1    | 1,114109993  | 0,00438 |
| ENSMUSG00000003934 | Efnb3    | -3,958529949 | 0,00439 |
| ENSMUSG00000037316 | Bag4     | 0,521539986  | 0,00439 |
| ENSMUSG00000013663 | Pten     | 0,60532999   | 0,0044  |
| ENSMUSG00000025525 | Apool    | 0,873870015  | 0,0044  |
| ENSMUSG00000020954 | Strn3    | -0,449070007 | 0,0044  |

|                    |          |              |         |
|--------------------|----------|--------------|---------|
| ENSMUSG00000063450 | Syne2    | -1,275650024 | 0,00441 |
| ENSMUSG00000025532 | Crcp     | 0,527249992  | 0,00441 |
| ENSMUSG00000061859 | Patj     | 1,15328002   | 0,00441 |
| ENSMUSG00000025983 | Ccdc150  | -4,418550014 | 0,00441 |
| ENSMUSG00000027935 | Rab13    | -0,879320025 | 0,00442 |
| ENSMUSG00000048707 | Tprn     | -1,128280044 | 0,00443 |
| ENSMUSG00000048109 | Rbm15    | -0,657509983 | 0,00443 |
| ENSMUSG00000066191 | Anks6    | -1,481480002 | 0,00445 |
| ENSMUSG00000010914 | Pdhx     | 0,665279984  | 0,00445 |
| ENSMUSG00000075229 | Ccdc58   | 1,096480012  | 0,00445 |
| ENSMUSG00000049728 | Zfp668   | -0,787090003 | 0,00446 |
| ENSMUSG00000035864 | Syt1     | 1,454419971  | 0,00447 |
| ENSMUSG00000040498 | Igsf23   | 1,773900032  | 0,00447 |
| ENSMUSG00000027487 | Cdk5rap1 | 0,79539001   | 0,00447 |
| ENSMUSG00000065265 | Gm23455  | -1,281509995 | 0,00448 |
| ENSMUSG00000024600 | Slc27a6  | -2,764800072 | 0,00449 |
| ENSMUSG00000018849 | Wwc1     | 0,884679973  | 0,00449 |
| ENSMUSG00000031480 | Thsd1    | -0,675320029 | 0,0045  |
| ENSMUSG00000070811 | Sult2a2  | 3,184580088  | 0,0045  |
| ENSMUSG00000024350 | Dnajc18  | -0,511900008 | 0,0045  |
| ENSMUSG00000033356 | Pus7l    | -0,842570007 | 0,00451 |
| ENSMUSG00000032109 | Nlrx1    | 0,548879981  | 0,00451 |
| ENSMUSG00000010609 | Psen2    | 1,576290011  | 0,00451 |
| ENSMUSG00000048307 | Ankrd46  | 0,708790004  | 0,00452 |
| ENSMUSG00000019302 | Atp6v0a1 | 0,642560005  | 0,00452 |
| ENSMUSG00000038074 | Fkbp14   | -0,709510028 | 0,00453 |
| ENSMUSG00000084497 | Gm22107  | -1,940709949 | 0,00453 |
| ENSMUSG00000017009 | Sdc4     | 0,815559983  | 0,00453 |
| ENSMUSG00000004056 | Akt2     | 0,461199999  | 0,00454 |
| ENSMUSG00000054604 | Cggbp1   | 0,245529994  | 0,00455 |
| ENSMUSG00000074749 | Kiz      | 0,548189998  | 0,00455 |
| ENSMUSG00000015214 | Mtmr1    | 0,879939973  | 0,00455 |
| ENSMUSG00000003273 | Car11    | -2,110029936 | 0,00456 |
| ENSMUSG00000025496 | Drd4     | -4,94382     | 0,00457 |
| ENSMUSG00000052942 | Glis3    | -1,761849999 | 0,00457 |
| ENSMUSG00000091803 | Cox16    | 0,883840024  | 0,00458 |
| ENSMUSG00000028796 | Phc2     | -1,026859999 | 0,00458 |
| ENSMUSG00000001542 | Eil2     | 0,68434      | 0,00458 |
| ENSMUSG00000094724 | Rnaset2b | 1,616700053  | 0,00459 |
| ENSMUSG00000047875 | Gpr157   | 0,988900006  | 0,0046  |
| ENSMUSG00000030987 | Stim1    | 1,530719995  | 0,0046  |
| ENSMUSG00000038533 | Cbfa2t2  | -0,696449995 | 0,00461 |
| ENSMUSG00000044708 | Kcnj10   | 1,781200051  | 0,00461 |
| ENSMUSG00000028261 | Ndufaf4  | 0,823930025  | 0,00461 |
| ENSMUSG00000029195 | Klb      | 1,825270057  | 0,00462 |
| ENSMUSG00000052087 | Rgs14    | -1,44133997  | 0,00463 |
| ENSMUSG00000058258 | Idi1     | 1,409150004  | 0,00463 |

|                    |          |              |         |
|--------------------|----------|--------------|---------|
| ENSMUSG00000047649 | Cd3eap   | -0,680570006 | 0,00465 |
| ENSMUSG00000032417 | Rwdd2a   | -1,471840024 | 0,00466 |
| ENSMUSG00000015342 | Xk       | 1,173930049  | 0,00467 |
| ENSMUSG00000029062 | Cdk11b   | -0,431989998 | 0,00467 |
| ENSMUSG00000061100 | Retnla   | -6,428100109 | 0,00468 |
| ENSMUSG00000042436 | Mfap4    | -1,823609948 | 0,00471 |
| ENSMUSG00000037730 | Mynn     | -0,664290011 | 0,00471 |
| ENSMUSG00000026463 | Atp2b4   | -1,200970054 | 0,00472 |
| ENSMUSG00000044390 | Tigd3    | -2,292949915 | 0,00472 |
| ENSMUSG00000074582 | Arfgef2  | 0,944660008  | 0,00472 |
| ENSMUSG00000022982 | Sod1     | 1,513260007  | 0,00473 |
| ENSMUSG00000025856 | Pdgfa    | -1,241870046 | 0,00473 |
| ENSMUSG00000022108 | Itm2b    | 0,774999976  | 0,00473 |
| ENSMUSG00000021263 | Degs2    | -1,563830018 | 0,00474 |
| ENSMUSG00000022978 | Mis18a   | -1,067819953 | 0,00474 |
| ENSMUSG00000026283 | Ing5     | -0,546570003 | 0,00475 |
| ENSMUSG00000043419 | Rnf227   | -1,37785995  | 0,00476 |
| ENSMUSG00000029472 | Anapc5   | -0,451139987 | 0,00476 |
| ENSMUSG00000010358 | Ifi35    | 1,037510037  | 0,00476 |
| ENSMUSG00000028832 | Stmn1    | -1,456689954 | 0,00478 |
| ENSMUSG00000036040 | Adamtsl2 | -1,301800013 | 0,00478 |
| ENSMUSG00000031971 | Ccsap    | -1,576990008 | 0,00479 |
| ENSMUSG00000033634 | Nat8f2   | 1,666509986  | 0,0048  |
| ENSMUSG00000017299 | Dnttip1  | -0,432300001 | 0,00481 |
| ENSMUSG00000035696 | Rnf38    | -1,02718997  | 0,00483 |
| ENSMUSG00000067825 | Pex26    | 0,621150017  | 0,00483 |
| ENSMUSG00000064302 | Clasp1   | -0,981440008 | 0,00483 |
| ENSMUSG00000022811 | Zfp148   | 0,580879986  | 0,00484 |
| ENSMUSG00000014355 | Anapc1   | -0,856249988 | 0,00485 |
| ENSMUSG00000030232 | Aebp2    | -0,516839981 | 0,00485 |
| ENSMUSG00000026784 | Pdss1    | -0,621159971 | 0,00486 |
| ENSMUSG00000026601 | Axdnd1   | -5,381720066 | 0,00488 |
| ENSMUSG00000021038 | Vipas39  | -0,617730021 | 0,00489 |
| ENSMUSG00000030317 | Timp4    | -4,596600056 | 0,00489 |
| ENSMUSG00000004270 | Lpcat3   | 0,889810026  | 0,00489 |
| ENSMUSG00000026971 | Itgb6    | -2,682509899 | 0,00491 |
| ENSMUSG00000015568 | Lpl      | 1,718140006  | 0,00491 |
| ENSMUSG00000060477 | Irak2    | 0,562579989  | 0,00492 |
| ENSMUSG00000003299 | Mrpl4    | 0,699469984  | 0,00492 |
| ENSMUSG00000020010 | Vnn3     | 1,79629004   | 0,00493 |
| ENSMUSG00000025188 | Hps1     | -0,49109     | 0,00494 |
| ENSMUSG00000031246 | Sh3bgrl  | 0,564689994  | 0,00494 |
| ENSMUSG00000034674 | Tdg      | -0,834940016 | 0,00495 |
| ENSMUSG00000028964 | Park7    | 0,930180013  | 0,00495 |
| ENSMUSG00000052572 | Dlg2     | -3,245460033 | 0,00496 |
| ENSMUSG00000027804 | Ppid     | -0,631190002 | 0,00496 |
| ENSMUSG00000022781 | Pak2     | -0,56607002  | 0,00497 |

|                    |               |              |         |
|--------------------|---------------|--------------|---------|
| ENSMUSG00000073889 | Il11ra1       | 1,186130047  | 0,00497 |
| ENSMUSG00000038425 | Poli          | -0,820630014 | 0,00499 |
| ENSMUSG00000068394 | Cep152        | -1,133149981 | 0,005   |
| ENSMUSG00000022462 | Slc38a2       | -0,844139993 | 0,005   |
| ENSMUSG00000035914 | Cd276         | -0,755959988 | 0,005   |
| ENSMUSG00000032065 | Tex12         | 1,877140045  | 0,00501 |
| ENSMUSG00000072662 | Mansc4        | 1,891649961  | 0,00501 |
| ENSMUSG00000089943 | Ugt1a5        | 2,579849958  | 0,00501 |
| ENSMUSG00000022178 | Ajuba         | -0,788869977 | 0,00501 |
| ENSMUSG00000038777 | Sema6c        | -1,341619968 | 0,00502 |
| ENSMUSG00000036959 | Bcor1         | -0,860050023 | 0,00502 |
| ENSMUSG00000070462 | Tlnrd1        | -0,679350019 | 0,00503 |
| ENSMUSG00000037999 | Arap2         | 0,845809996  | 0,00503 |
| ENSMUSG00000025916 | Ppp1r42       | 2,095860004  | 0,00504 |
| ENSMUSG00000028825 | Rhd           | -3,106529951 | 0,00504 |
| ENSMUSG00000041607 | Mbp           | -1,435160041 | 0,00504 |
| ENSMUSG00000042121 | Ssh1          | -0,74713999  | 0,00504 |
| ENSMUSG00000032582 | Rbm6          | -0,469709992 | 0,00504 |
| ENSMUSG00000022443 | Myh9          | -1,366440058 | 0,00506 |
| ENSMUSG00000046096 | Mosmo         | -0,581449986 | 0,00507 |
| ENSMUSG00000004661 | Arid3b        | -0,890299976 | 0,00509 |
| ENSMUSG00000043418 | Lrit2         | 2,061130047  | 0,00509 |
| ENSMUSG00000028687 | Mutyh         | -1,355260015 | 0,0051  |
| ENSMUSG00000021193 | Pitrm1        | -0,819480002 | 0,0051  |
| ENSMUSG00000028344 | Invs          | 1,098049998  | 0,0051  |
| ENSMUSG00000028048 | Gba           | -0,638830006 | 0,00512 |
| ENSMUSG00000069300 | Hist1h2bj     | -2,266619921 | 0,00513 |
| ENSMUSG00000061898 | Rbak          | -0,711470008 | 0,00513 |
| ENSMUSG00000018841 | Rad51d        | 0,633979976  | 0,00513 |
| ENSMUSG00000047904 | Sstr2         | 1,971439958  | 0,00513 |
| ENSMUSG00000074182 | Znhit6        | -0,551400006 | 0,00515 |
| ENSMUSG00000045103 | Dmd           | 1,101719975  | 0,00515 |
| ENSMUSG00000016763 | Scube1        | -1,949470043 | 0,00517 |
| ENSMUSG00000031504 | Rab20         | 0,861060023  | 0,00518 |
| ENSMUSG00000033629 | Hacd3         | 0,759019971  | 0,0052  |
| ENSMUSG00000009563 | Tor2a         | 0,637969971  | 0,00521 |
| ENSMUSG00000040412 | 5330417C22Rik | 1,916710019  | 0,00521 |
| ENSMUSG00000068762 | Gstm6         | 1,495679975  | 0,00522 |
| ENSMUSG00000035021 | Baz1a         | -0,876739979 | 0,00523 |
| ENSMUSG00000036622 | Atp13a2       | 0,42513001   | 0,00524 |
| ENSMUSG00000040061 | Plcb2         | -0,924589992 | 0,00524 |
| ENSMUSG00000020694 | Tlk2          | -0,404339999 | 0,00525 |
| ENSMUSG00000032841 | Prr5l         | 1,43441999   | 0,00526 |
| ENSMUSG00000055148 | Klf2          | -1,543470025 | 0,00527 |
| ENSMUSG00000024269 | Tpgs2         | -0,882380009 | 0,00527 |
| ENSMUSG00000026399 | Cd55          | 1,173149943  | 0,00527 |
| ENSMUSG00000022142 | Nup155        | -0,738319993 | 0,00528 |

|                    |               |              |         |
|--------------------|---------------|--------------|---------|
| ENSMUSG0000005882  | Uqcc1         | 0,520699978  | 0,00528 |
| ENSMUSG00000037434 | Slc30a1       | 0,961709976  | 0,00529 |
| ENSMUSG00000019732 | Calr3         | 1,14233005   | 0,00529 |
| ENSMUSG00000037636 | Slc25a43      | -1,883129954 | 0,0053  |
| ENSMUSG00000026238 | Ptma          | -0,698949993 | 0,00533 |
| ENSMUSG00000040204 | Pclaf         | -1,531000018 | 0,00533 |
| ENSMUSG00000022526 | Zfp251        | -1,07348001  | 0,00534 |
| ENSMUSG00000076435 | Acsf2         | 1,278419971  | 0,00534 |
| ENSMUSG00000076749 | Tcrg-C1       | -4,02971983  | 0,00535 |
| ENSMUSG00000028865 | Cd164l2       | -3,368330002 | 0,00537 |
| ENSMUSG00000055652 | Klhl25        | 0,658479989  | 0,00537 |
| ENSMUSG00000039304 | Tnfsf10       | 1,517259955  | 0,0054  |
| ENSMUSG00000029279 | Brdt          | 0,821799994  | 0,0054  |
| ENSMUSG00000052681 | Rap1b         | -0,730260015 | 0,00544 |
| ENSMUSG00000029810 | Tmem176b      | 1,334280014  | 0,00545 |
| ENSMUSG00000044629 | Cnrip1        | -1,231189966 | 0,00546 |
| ENSMUSG00000026096 | Osgepl1       | 0,802869976  | 0,00546 |
| ENSMUSG00000075224 | Lrrc55        | -3,181999922 | 0,00548 |
| ENSMUSG00000069272 | Hist1h2ae     | -1,644379973 | 0,00548 |
| ENSMUSG00000000308 | Ckmt1         | -3,02147007  | 0,00549 |
| ENSMUSG00000037833 | Sh2d4b        | -3,158400059 | 0,00551 |
| ENSMUSG00000026107 | Nabp1         | -0,693419993 | 0,00553 |
| ENSMUSG00000018909 | Arrb1         | -1,114850044 | 0,00553 |
| ENSMUSG00000031483 | Erlin2        | -0,668229997 | 0,00554 |
| ENSMUSG00000033054 | Npat          | -0,86372     | 0,00555 |
| ENSMUSG00000073471 | Rsph3a        | 0,589039981  | 0,00555 |
| ENSMUSG00000033857 | Engase        | 1,008170009  | 0,00555 |
| ENSMUSG00000064370 | mt-Cytb       | 0,785300016  | 0,00556 |
| ENSMUSG00000028792 | Ak2           | 0,928979993  | 0,00559 |
| ENSMUSG00000040034 | Nup43         | -0,723330021 | 0,0056  |
| ENSMUSG00000024969 | Mark2         | -0,741410017 | 0,0056  |
| ENSMUSG00000005470 | Asf1b         | -1,709010005 | 0,00561 |
| ENSMUSG00000041737 | Tmem45b       | 2,254359961  | 0,00561 |
| ENSMUSG00000009681 | Bcr           | -0,645280004 | 0,00562 |
| ENSMUSG00000028232 | Tmem68        | -0,424970001 | 0,00562 |
| ENSMUSG00000048581 | E130311K13Rik | 0,914200008  | 0,00562 |
| ENSMUSG00000031295 | Phka2         | 0,711310029  | 0,00562 |
| ENSMUSG00000034353 | Ramp1         | -1,519019961 | 0,00563 |
| ENSMUSG00000034832 | Tet3          | -0,870540023 | 0,00563 |
| ENSMUSG00000028255 | Clca1         | -6,648900032 | 0,00564 |
| ENSMUSG00000046792 | Zfp787        | 0,645860016  | 0,00564 |
| ENSMUSG00000052684 | Jun           | -1,07122004  | 0,00564 |
| ENSMUSG00000056174 | Col8a2        | -2,797909975 | 0,00565 |
| ENSMUSG00000031681 | Smad1         | -0,469819993 | 0,00567 |
| ENSMUSG00000019779 | Frk           | -0,86996001  | 0,00567 |
| ENSMUSG00000022033 | Pbk           | -1,414890051 | 0,00567 |
| ENSMUSG00000031360 | Ctps2         | 0,705070019  | 0,00568 |

|                    |          |              |         |
|--------------------|----------|--------------|---------|
| ENSMUSG00000040242 | Fgfr1op2 | 0,315809995  | 0,00569 |
| ENSMUSG00000089989 | Gm45713  | 1,022259951  | 0,00569 |
| ENSMUSG00000052821 | Cysltr1  | -1,391049981 | 0,00572 |
| ENSMUSG00000024431 | Nr3c1    | 0,976549983  | 0,00572 |
| ENSMUSG00000020216 | Jsrp1    | -5,377359867 | 0,00573 |
| ENSMUSG00000089694 | Nat8f7   | 3,462949991  | 0,00573 |
| ENSMUSG00000031371 | Haus7    | 0,749260008  | 0,00574 |
| ENSMUSG00000041426 | Hibch    | 1,181609988  | 0,00574 |
| ENSMUSG00000033295 | Ptprf    | 1,084139943  | 0,00575 |
| ENSMUSG00000047710 | Champ1   | -0,554019988 | 0,00575 |
| ENSMUSG00000022233 | Rhoc     | -1,248180032 | 0,00577 |
| ENSMUSG00000041506 | Rrp9     | -0,888329983 | 0,00577 |
| ENSMUSG00000024132 | Eci1     | 1,05625999   | 0,00577 |
| ENSMUSG00000066637 | Ttc32    | 1,376139998  | 0,00577 |
| ENSMUSG00000091648 | C2cd4d   | 1,910599947  | 0,00578 |
| ENSMUSG00000075502 | Kbtbd6   | -2,506819963 | 0,0058  |
| ENSMUSG00000041444 | Arhgap32 | -0,994109988 | 0,0058  |
| ENSMUSG00000066568 | Lsm14a   | -0,512870014 | 0,0058  |
| ENSMUSG00000074211 | Sdhaf1   | 1,097139955  | 0,0058  |
| ENSMUSG00000029204 | Rhoh     | -1,409340024 | 0,00581 |
| ENSMUSG00000027639 | Samhd1   | -0,52767998  | 0,00581 |
| ENSMUSG00000031445 | Proz     | 1,936139941  | 0,00581 |
| ENSMUSG00000029910 | Mad2l1   | -0,967100024 | 0,00582 |
| ENSMUSG00000022228 | Zscan26  | 0,600399971  | 0,00582 |
| ENSMUSG00000046826 | Fam187b  | 1,617939949  | 0,00583 |
| ENSMUSG00000048677 | Tpcn2    | -0,742649972 | 0,00586 |
| ENSMUSG00000091896 | Ube2d2a  | -0,500699997 | 0,00587 |
| ENSMUSG00000030306 | Tmtc1    | -1,577859998 | 0,00587 |
| ENSMUSG00000021235 | Coq6     | 0,516099989  | 0,00588 |
| ENSMUSG00000055003 | Lrtm2    | 2,314219952  | 0,00588 |
| ENSMUSG00000058799 | Nap1l1   | -0,766229987 | 0,0059  |
| ENSMUSG00000028626 | Col9a2   | -3,757329941 | 0,00591 |
| ENSMUSG00000042589 | Cux2     | 2,908309937  | 0,00592 |
| ENSMUSG00000089876 | Tmem102  | 1,347990036  | 0,00593 |
| ENSMUSG00000048583 | Igf2     | -2,695460081 | 0,00594 |
| ENSMUSG00000029163 | Emilin1  | -0,72744     | 0,00594 |
| ENSMUSG00000023806 | Rsph3b   | 0,820659995  | 0,00594 |
| ENSMUSG00000064901 | Snora21  | -3,952950001 | 0,00595 |
| ENSMUSG00000027288 | Zfp106   | -0,637350023 | 0,00595 |
| ENSMUSG00000029863 | Casp2    | -0,905889988 | 0,00596 |
| ENSMUSG00000005312 | Ubqln1   | 0,404309988  | 0,00596 |
| ENSMUSG00000043155 | Hpd1     | -2,198940039 | 0,00597 |
| ENSMUSG00000027015 | Cybrd1   | -2,629070044 | 0,00597 |
| ENSMUSG00000016487 | Ppfibp1  | -1,086380005 | 0,00598 |
| ENSMUSG00000026994 | Galnt3   | -1,487499952 | 0,00599 |
| ENSMUSG00000037197 | Rbm17    | -0,65061003  | 0,00599 |
| ENSMUSG00000063412 | Gm10131  | -0,934010029 | 0,006   |



|                    |         |              |         |
|--------------------|---------|--------------|---------|
| ENSMUSG00000074476 | Spc24   | 1,145359993  | 0,006   |
| ENSMUSG00000056211 | R3hdm1  | -0,602620006 | 0,00601 |
| ENSMUSG00000074060 | Fbxw15  | 3,412100077  | 0,00601 |
| ENSMUSG00000093904 | Tom20   | -0,699379981 | 0,00602 |
| ENSMUSG00000044595 | Dnd1    | -1,142160058 | 0,00603 |
| ENSMUSG00000020592 | Sdc1    | -0,655489981 | 0,00603 |
| ENSMUSG00000062209 | Erb4    | 1,716760039  | 0,00603 |
| ENSMUSG00000051730 | Mett15  | 0,828890026  | 0,00604 |
| ENSMUSG00000027284 | Cdan1   | -0,375939995 | 0,00605 |
| ENSMUSG00000026582 | Sele    | -2,948740005 | 0,00606 |
| ENSMUSG00000032278 | Paqr5   | -2,571899891 | 0,00607 |
| ENSMUSG00000073705 | Cenps   | -1,708969951 | 0,00607 |
| ENSMUSG00000047371 | Zfp768  | 0,509410024  | 0,00608 |
| ENSMUSG00000002104 | Rapsn   | -3,188549995 | 0,00609 |
| ENSMUSG00000064326 | Siva1   | -1,539899945 | 0,0061  |
| ENSMUSG00000056394 | Lig1    | -0,850740016 | 0,0061  |
| ENSMUSG00000070323 | Mmp27   | 1,409289956  | 0,0061  |
| ENSMUSG00000030281 | Il17rc  | 1,047389984  | 0,00611 |
| ENSMUSG00000036748 | Cuedc2  | -1,10860002  | 0,00612 |
| ENSMUSG00000022102 | Dok2    | -1,111789942 | 0,00613 |
| ENSMUSG00000063856 | Gpx1    | 1,240980029  | 0,00613 |
| ENSMUSG00000035285 | Nat14   | -1,701719999 | 0,00616 |
| ENSMUSG00000053279 | Aldh1a1 | 1,52046001   | 0,00616 |
| ENSMUSG00000009633 | G0s2    | 1,685780048  | 0,00616 |
| ENSMUSG00000067367 | Lyar    | -0,769800007 | 0,00617 |
| ENSMUSG00000028470 | Hint2   | 1,690719962  | 0,00617 |
| ENSMUSG00000074240 | Cib3    | 2,221570015  | 0,00619 |
| ENSMUSG00000024791 | Cdca5   | -1,816540003 | 0,00621 |
| ENSMUSG00000077563 | Snora68 | -1,818199992 | 0,00622 |
| ENSMUSG00000045917 | Tmem268 | 0,677349985  | 0,00622 |
| ENSMUSG00000078681 | Tm2d3   | 1,362269998  | 0,00623 |
| ENSMUSG00000031372 | Trex2   | 3,665839911  | 0,00623 |
| ENSMUSG00000006362 | Cbfa2t3 | -1,05092001  | 0,00624 |
| ENSMUSG00000063077 | Kif1b   | 0,961109996  | 0,00625 |
| ENSMUSG00000028060 | Khdc4   | -0,563939989 | 0,00626 |
| ENSMUSG00000038973 | Cldnd2  | 3,148920059  | 0,00626 |
| ENSMUSG00000079685 | Ubp1    | -3,878249884 | 0,00628 |
| ENSMUSG00000035045 | Zc3h12b | -2,593179941 | 0,00628 |
| ENSMUSG00000038415 | Foxq1   | 1,477720022  | 0,00628 |
| ENSMUSG00000001909 | Trmt1   | -0,47141999  | 0,00629 |
| ENSMUSG00000024097 | Srsf7   | -0,667990029 | 0,0063  |
| ENSMUSG00000052395 | Rft1    | 0,568359971  | 0,0063  |
| ENSMUSG00000039737 | Prkrip1 | -0,872739971 | 0,0063  |
| ENSMUSG00000055994 | Nod2    | -1,462520003 | 0,00631 |
| ENSMUSG00000058594 | Fbh1    | -0,409920007 | 0,00631 |
| ENSMUSG00000022769 | Sdf2l1  | 1,210919976  | 0,00632 |
| ENSMUSG00000032725 | Folr2   | 1,237190008  | 0,00633 |

|                    |         |              |         |
|--------------------|---------|--------------|---------|
| ENSMUSG00000058498 | Rnf207  | -5,262660027 | 0,00636 |
| ENSMUSG00000019935 | Slc17a8 | 1,882840037  | 0,00636 |
| ENSMUSG00000031527 | Eri1    | -0,518930018 | 0,00636 |
| ENSMUSG00000075254 | Heg1    | -0,825879991 | 0,00637 |
| ENSMUSG00000046997 | Spsb4   | 1,165279984  | 0,00637 |
| ENSMUSG00000043259 | Fam13c  | -3,111409903 | 0,00638 |
| ENSMUSG00000028036 | Ptgfr   | -2,201450109 | 0,00638 |
| ENSMUSG00000024878 | Cbwd1   | -0,514639974 | 0,00639 |
| ENSMUSG00000000276 | Dgke    | -0,937359989 | 0,0064  |
| ENSMUSG00000042743 | Sgtb    | -1,175179958 | 0,00641 |
| ENSMUSG00000028452 | Vcp     | 0,375429988  | 0,00641 |
| ENSMUSG00000030968 | Pdilt   | 1,546229959  | 0,00642 |
| ENSMUSG00000017830 | Dhx58   | 1,247670054  | 0,00643 |
| ENSMUSG00000024817 | Uhrf2   | -0,672749996 | 0,00643 |
| ENSMUSG00000059486 | Kbtbd2  | -0,473379999 | 0,00643 |
| ENSMUSG00000000562 | Adora3  | -2,353830099 | 0,00644 |
| ENSMUSG00000054435 | Gimap4  | 0,919650018  | 0,00645 |
| ENSMUSG00000020495 | Smg8    | -0,615329981 | 0,00646 |
| ENSMUSG00000051169 | Rpusd3  | 1,313660026  | 0,00646 |
| ENSMUSG00000066607 | Insyn1  | 1,928940058  | 0,00647 |
| ENSMUSG00000073633 | Fbxo36  | 0,870159984  | 0,00648 |
| ENSMUSG00000030032 | Wdr54   | -1,147179961 | 0,00648 |
| ENSMUSG00000056054 | S100a8  | -2,423120022 | 0,00649 |
| ENSMUSG00000015846 | Rxra    | 1,054919958  | 0,0065  |
| ENSMUSG00000029428 | Stx2    | -0,588050008 | 0,00651 |
| ENSMUSG00000079110 | Capn3   | 1,891139984  | 0,00651 |
| ENSMUSG00000025544 | Tm9sf2  | 0,418769985  | 0,00652 |
| ENSMUSG00000021676 | Iqgap2  | 1,57407999   | 0,00654 |
| ENSMUSG00000051279 | Gdf6    | -1,660240054 | 0,00657 |
| ENSMUSG00000045314 | Sowahb  | 1,20886004   | 0,00657 |
| ENSMUSG00000032098 | Treh    | 1,529279947  | 0,00658 |
| ENSMUSG00000079259 | Trim71  | -3,45182991  | 0,00661 |
| ENSMUSG00000054162 | Spock3  | -3,302050114 | 0,00661 |
| ENSMUSG00000020777 | Acox1   | 1,220549941  | 0,00661 |
| ENSMUSG00000031734 | Irx3    | -1,720759988 | 0,00662 |
| ENSMUSG0000003269  | Cyth2   | -0,993049979 | 0,00662 |
| ENSMUSG00000024191 | Bnip1   | 0,889450014  | 0,00662 |
| ENSMUSG00000028461 | Ccdc107 | 1,455819964  | 0,00662 |
| ENSMUSG00000030685 | Kctd13  | -0,677760005 | 0,00666 |
| ENSMUSG00000037849 | Ifi206  | -2,952069998 | 0,00666 |
| ENSMUSG00000022853 | Ehhadh  | 1,52117002   | 0,00667 |
| ENSMUSG00000022055 | Nefl    | -11,70526028 | 0,00667 |
| ENSMUSG00000071723 | Gspt2   | -1,498710036 | 0,00668 |
| ENSMUSG00000049878 | Rlf     | -0,904820025 | 0,00668 |
| ENSMUSG00000025959 | Klf7    | -1,245360017 | 0,00669 |
| ENSMUSG00000018428 | Akap1   | 0,89793998   | 0,00669 |
| ENSMUSG00000027323 | Rad51   | -1,318580031 | 0,0067  |

|                    |               |              |         |
|--------------------|---------------|--------------|---------|
| ENSMUSG00000020647 | Ncoa1         | 0,838649988  | 0,0067  |
| ENSMUSG00000028035 | Dnajb4        | 0,41376999   | 0,00671 |
| ENSMUSG00000029486 | Mrpl1         | 0,769840002  | 0,00671 |
| ENSMUSG00000070003 | Ssbp4         | -1,206910014 | 0,00672 |
| ENSMUSG00000066900 | Suds3         | 0,532459974  | 0,00672 |
| ENSMUSG00000032026 | Rexo2         | 0,698750019  | 0,00672 |
| ENSMUSG00000050002 | Idnk          | 1,185789943  | 0,00672 |
| ENSMUSG00000032988 | Slc16a8       | -3,80501008  | 0,00672 |
| ENSMUSG00000003872 | Lin7b         | -3,937269926 | 0,00673 |
| ENSMUSG00000061306 | Slc38a10      | 0,373739988  | 0,00673 |
| ENSMUSG00000054520 | Sh3bp2        | -0,58405     | 0,00673 |
| ENSMUSG00000035547 | Capn5         | -1,331889987 | 0,00674 |
| ENSMUSG00000052423 | B4galt3       | -0,944850028 | 0,00674 |
| ENSMUSG00000002205 | Vrk3          | 0,768570006  | 0,00674 |
| ENSMUSG00000033364 | Usp37         | -0,815039992 | 0,00675 |
| ENSMUSG00000009376 | Met           | 0,70551002   | 0,00675 |
| ENSMUSG00000032228 | Tcf12         | -1,149099946 | 0,00676 |
| ENSMUSG00000041632 | Mrps27        | 0,538320005  | 0,00677 |
| ENSMUSG00000039936 | Pik3cd        | -0,756950021 | 0,00678 |
| ENSMUSG00000048458 | Inka2         | -1,623059988 | 0,00679 |
| ENSMUSG00000022269 | March11       | -4,521090031 | 0,0068  |
| ENSMUSG00000090877 | Hspa1b        | -1,312729955 | 0,00681 |
| ENSMUSG00000006418 | Rnf114        | 0,483920008  | 0,00683 |
| ENSMUSG00000024687 | Osbp          | 0,58743      | 0,00683 |
| ENSMUSG00000020926 | Adam11        | 1,463240027  | 0,00684 |
| ENSMUSG00000032860 | P2ry2         | 0,74962002   | 0,00684 |
| ENSMUSG00000003721 | Insig2        | 1,452200055  | 0,00685 |
| ENSMUSG00000040350 | Trim7         | 1,092319965  | 0,00686 |
| ENSMUSG00000051768 | Xrcc1         | -0,644879997 | 0,00687 |
| ENSMUSG00000028635 | Edn2          | -6,291069984 | 0,00687 |
| ENSMUSG00000032186 | Tmod2         | -5,216700077 | 0,00687 |
| ENSMUSG00000028702 | Rad54l        | -1,710379958 | 0,00687 |
| ENSMUSG00000070368 | Prok1         | 2,226799965  | 0,00688 |
| ENSMUSG00000036292 | Gramd1c       | 1,477509975  | 0,00689 |
| ENSMUSG00000026679 | Enkur         | -2,07156992  | 0,0069  |
| ENSMUSG00000021023 | 1110008L16Rik | 0,437139988  | 0,0069  |
| ENSMUSG00000031821 | Gins2         | -1,422719955 | 0,0069  |
| ENSMUSG00000026770 | Il2ra         | -1,79144001  | 0,00691 |
| ENSMUSG00000034617 | Mtrr          | -0,73477     | 0,00691 |
| ENSMUSG00000048833 | Slc39a9       | 0,876470029  | 0,00691 |
| ENSMUSG00000057315 | Arhgap24      | 1,015660048  | 0,00692 |
| ENSMUSG00000039640 | Mrpl12        | 0,954900026  | 0,00693 |
| ENSMUSG00000022412 | Mief1         | -0,500580013 | 0,00693 |
| ENSMUSG00000049957 | Ccdc137       | -0,74188     | 0,00695 |
| ENSMUSG00000032058 | Ppp2r1b       | -0,570379972 | 0,00697 |
| ENSMUSG00000029780 | Nt5c3         | 0,764580011  | 0,00697 |
| ENSMUSG00000020064 | Herc4         | 0,467269987  | 0,00702 |

|                    |               |              |         |
|--------------------|---------------|--------------|---------|
| ENSMUSG00000058318 | Phf21a        | -0,788030028 | 0,00703 |
| ENSMUSG00000042476 | Abcb4         | 1,513900042  | 0,00703 |
| ENSMUSG00000024798 | Htr7          | -3,914400101 | 0,00707 |
| ENSMUSG00000026078 | Pdcl3         | -0,902660012 | 0,00707 |
| ENSMUSG00000024896 | Minpp1        | 0,601710021  | 0,00707 |
| ENSMUSG00000003355 | Fkbp11        | 1,362210035  | 0,00707 |
| ENSMUSG00000022817 | Itgb5         | 0,456230015  | 0,00709 |
| ENSMUSG00000052253 | Zfp622        | -0,583039999 | 0,00709 |
| ENSMUSG00000021391 | Cenpp         | -1,007840037 | 0,0071  |
| ENSMUSG00000040017 | Saa4          | 1,708799958  | 0,00711 |
| ENSMUSG00000040722 | Scamp5        | 0,819440007  | 0,00712 |
| ENSMUSG00000022820 | Ndufb4        | 1,125779986  | 0,00712 |
| ENSMUSG00000038175 | Mylip         | 0,749289989  | 0,00714 |
| ENSMUSG00000058638 | Zfp110        | 0,466670007  | 0,00714 |
| ENSMUSG00000040380 | Cbln3         | 1,709990025  | 0,00716 |
| ENSMUSG00000032262 | Elovl4        | -6,638500214 | 0,00716 |
| ENSMUSG00000026158 | Ogfr1         | 0,797550023  | 0,00716 |
| ENSMUSG00000045007 | Tube2         | -1,872879982 | 0,00718 |
| ENSMUSG00000070063 | Snora33       | -1,856400013 | 0,00719 |
| ENSMUSG00000030629 | Zfand6        | 0,602110028  | 0,00719 |
| ENSMUSG00000024617 | Camk2a        | -2,39312005  | 0,0072  |
| ENSMUSG00000057530 | Ece1          | 0,600189984  | 0,0072  |
| ENSMUSG00000036957 | Lrnf3         | 1,429149985  | 0,00721 |
| ENSMUSG00000040177 | 2310057M21Rik | -0,762870014 | 0,00722 |
| ENSMUSG00000031070 | Mrgprf        | -2,600810051 | 0,00723 |
| ENSMUSG00000025237 | Parp6         | -0,658399999 | 0,00723 |
| ENSMUSG00000049411 | Tmem241       | 0,713270009  | 0,00724 |
| ENSMUSG00000033760 | Rbm4b         | 0,426149994  | 0,00725 |
| ENSMUSG00000060771 | Tsga10        | -0,671959996 | 0,00725 |
| ENSMUSG00000019996 | Map7          | 1,290169954  | 0,00725 |
| ENSMUSG00000001156 | Mxd1          | -0,676150024 | 0,00726 |
| ENSMUSG00000000739 | Sult5a1       | 1,951030016  | 0,00727 |
| ENSMUSG00000036790 | Slitrk2       | -7,300769806 | 0,00729 |
| ENSMUSG00000027843 | Ptpn22        | -1,038779974 | 0,00731 |
| ENSMUSG00000033184 | Tmed7         | 0,31487      | 0,00732 |
| ENSMUSG00000018882 | Mrpl45        | -0,48458001  | 0,00733 |
| ENSMUSG00000059540 | Tcea2         | -1,355290055 | 0,00735 |
| ENSMUSG00000056260 | Lrif1         | -0,491270006 | 0,00735 |
| ENSMUSG00000024383 | Map3k2        | -0,809930027 | 0,00735 |
| ENSMUSG00000030588 | Yif1b         | 0,58829999   | 0,00736 |
| ENSMUSG00000032392 | Parp16        | 0,666040003  | 0,00736 |
| ENSMUSG00000034432 | Cops8         | -0,559199989 | 0,00737 |
| ENSMUSG00000063019 | Manbal        | -0,862100005 | 0,00738 |
| ENSMUSG00000039738 | Slx4          | -0,916830003 | 0,00738 |
| ENSMUSG00000054484 | Tmem62        | 1,152060032  | 0,00738 |
| ENSMUSG00000070661 | Rnf186        | 1,634050012  | 0,00742 |
| ENSMUSG00000062542 | Syt9          | -1,453119993 | 0,00747 |

|                    |          |              |         |
|--------------------|----------|--------------|---------|
| ENSMUSG00000044700 | Tmem201  | -0,536719978 | 0,00747 |
| ENSMUSG00000015085 | Entpd2   | 1,351719975  | 0,00747 |
| ENSMUSG00000005672 | Kit      | -0,961790025 | 0,00747 |
| ENSMUSG00000021615 | Xrcc4    | 0,808809996  | 0,00747 |
| ENSMUSG00000030844 | Rgs10    | -1,420439959 | 0,00748 |
| ENSMUSG00000038045 | Sult6b1  | -3,650010109 | 0,0075  |
| ENSMUSG00000068739 | Sars     | -0,550689995 | 0,00751 |
| ENSMUSG00000018677 | Slc25a39 | 1,051730037  | 0,00753 |
| ENSMUSG00000035929 | H2-Q4    | 1,194509983  | 0,00754 |
| ENSMUSG00000038077 | Kcna6    | -4,668580055 | 0,00755 |
| ENSMUSG00000020282 | Rhbdf1   | -0,658659995 | 0,00757 |
| ENSMUSG00000001247 | Lsr      | 1,38973999   | 0,00757 |
| ENSMUSG00000053007 | Creb5    | -3,780920029 | 0,00758 |
| ENSMUSG00000032182 | Yipf2    | 0,749930024  | 0,00758 |
| ENSMUSG00000037946 | Fgd3     | -1,220700026 | 0,0076  |
| ENSMUSG00000022243 | Slc45a2  | 3,683809996  | 0,00762 |
| ENSMUSG00000040225 | Prrc2c   | -1,034129977 | 0,00766 |
| ENSMUSG00000024240 | Epc1     | -0,742009997 | 0,00766 |
| ENSMUSG00000044949 | Ubt2     | -1,807600021 | 0,00767 |
| ENSMUSG00000030203 | Dusp16   | 0,705950022  | 0,00767 |
| ENSMUSG00000078941 | Ak6      | -0,724349976 | 0,00769 |
| ENSMUSG00000025371 | Chmp6    | 0,714110017  | 0,0077  |
| ENSMUSG00000038002 | Cramp1l  | -0,852779984 | 0,00771 |
| ENSMUSG00000026201 | Stk16    | 0,639469981  | 0,00771 |
| ENSMUSG00000039345 | Mettl22  | 1,067059994  | 0,00771 |
| ENSMUSG00000006527 | Sfmbt1   | 0,893339992  | 0,00772 |
| ENSMUSG00000047534 | Mis18bp1 | -1,686419964 | 0,00773 |
| ENSMUSG00000032383 | Ppib     | 0,770500004  | 0,00773 |
| ENSMUSG00000041986 | Elmod1   | -7,54226017  | 0,00774 |
| ENSMUSG00000028655 | Mfsd2a   | 1,871029973  | 0,00775 |
| ENSMUSG00000031917 | Nip7     | -0,813610017 | 0,00776 |
| ENSMUSG00000026873 | Phf19    | -1,465340018 | 0,00777 |
| ENSMUSG00000040459 | Arglu1   | -0,433510005 | 0,00778 |
| ENSMUSG00000050310 | Rictor   | -0,976859987 | 0,00779 |
| ENSMUSG00000019428 | Fkbp8    | 0,98714      | 0,00779 |
| ENSMUSG00000079056 | Kcnp3    | -1,305709958 | 0,0078  |
| ENSMUSG00000043313 | Pcdhb19  | -3,237509966 | 0,0078  |
| ENSMUSG00000024998 | Plce1    | -0,940850019 | 0,00781 |
| ENSMUSG00000021057 | Akap5    | -2,225800037 | 0,00781 |
| ENSMUSG00000021144 | Mta1     | -0,470690012 | 0,00781 |
| ENSMUSG00000018554 | Ybx2     | -3,17392993  | 0,00782 |
| ENSMUSG00000038848 | Ythdf1   | -0,328150004 | 0,00783 |
| ENSMUSG00000026003 | Acadl    | 0,756760001  | 0,00785 |
| ENSMUSG00000065434 | Mir7-1   | -2,148780107 | 0,00787 |
| ENSMUSG00000029047 | Pex10    | 0,511550009  | 0,00787 |
| ENSMUSG00000020978 | Klhdc2   | -0,505970001 | 0,00788 |
| ENSMUSG00000026435 | Slc45a3  | 1,500149965  | 0,00793 |

|                    |               |              |         |
|--------------------|---------------|--------------|---------|
| ENSMUSG00000068696 | Gpr88         | -4,107870102 | 0,00793 |
| ENSMUSG00000044952 | Kctd21        | 0,996270001  | 0,00795 |
| ENSMUSG00000074818 | Pdzd7         | -2,350120068 | 0,00796 |
| ENSMUSG00000020123 | Avpr1a        | 1,324669957  | 0,00796 |
| ENSMUSG00000036278 | Macrodl       | 1,422889948  | 0,00796 |
| ENSMUSG00000095620 | 2010005H15Rik | -6,96818018  | 0,00798 |
| ENSMUSG00000026961 | Lrrc26        | -3,749850035 | 0,00798 |
| ENSMUSG00000035171 | 1110059E24Rik | 0,674170017  | 0,00798 |
| ENSMUSG00000035126 | Wdr78         | -1,985569954 | 0,00799 |
| ENSMUSG00000052713 | Zfp608        | -1,359400034 | 0,00799 |
| ENSMUSG00000044359 | P2ry4         | 3,512700081  | 0,008   |
| ENSMUSG00000071757 | Zhx2          | 0,397630006  | 0,00801 |
| ENSMUSG00000035069 | Oma1          | 0,583739996  | 0,00805 |
| ENSMUSG00000052676 | Zmat1         | 0,630110025  | 0,00807 |
| ENSMUSG00000029605 | Oas1b         | 0,990270019  | 0,00808 |
| ENSMUSG00000015971 | Actr8         | 0,366519988  | 0,00811 |
| ENSMUSG00000032557 | Uba5          | 0,455339998  | 0,00813 |
| ENSMUSG00000023067 | Cdkn1a        | -1,793040037 | 0,00814 |
| ENSMUSG00000002250 | Ppard         | -1,280329943 | 0,00814 |
| ENSMUSG00000020114 | Cand1         | -0,418650001 | 0,00814 |
| ENSMUSG00000024795 | Kif20b        | -1,544109941 | 0,00817 |
| ENSMUSG00000028917 | Plekhm2       | -0,381989986 | 0,00817 |
| ENSMUSG00000037913 | Tmem156       | -2,323199987 | 0,00818 |
| ENSMUSG00000024592 | C330018D20Rik | 0,640789986  | 0,00819 |
| ENSMUSG00000027665 | Pik3ca        | -0,546729982 | 0,0082  |
| ENSMUSG00000039809 | Gabbr2        | 1,940919995  | 0,0082  |
| ENSMUSG00000057716 | Tmem178b      | -3,281790018 | 0,00821 |
| ENSMUSG00000028836 | Slc30a2       | -2,67366004  | 0,00822 |
| ENSMUSG00000060441 | Trim5         | 1,013759971  | 0,00823 |
| ENSMUSG00000073489 | Ifi204        | -1,224259973 | 0,00823 |
| ENSMUSG00000051177 | Plcb1         | 1,077630043  | 0,00824 |
| ENSMUSG00000031957 | Ctrb1         | -5,223480225 | 0,00825 |
| ENSMUSG00000018858 | Mrpl58        | 0,937470019  | 0,00826 |
| ENSMUSG00000062646 | Ganc          | 1,151340008  | 0,00827 |
| ENSMUSG00000025701 | Alox5         | -2,188839912 | 0,00827 |
| ENSMUSG00000029414 | Kntc1         | -1,712080002 | 0,00828 |
| ENSMUSG00000064363 | mt-Nd4        | 0,964039981  | 0,00828 |
| ENSMUSG00000069607 | Cd300ld3      | 4,846059799  | 0,00829 |
| ENSMUSG00000015090 | Ptgds         | 1,820240021  | 0,00831 |
| ENSMUSG00000027165 | B230118H07Rik | 1,13409996   | 0,00831 |
| ENSMUSG00000091119 | Ccdc152       | 1,510640025  | 0,00832 |
| ENSMUSG00000045180 | Shroom2       | 1,002410054  | 0,00833 |
| ENSMUSG00000036893 | Ehmt1         | -0,926940024 | 0,00834 |
| ENSMUSG00000024870 | Rab1b         | 0,347660005  | 0,00838 |
| ENSMUSG00000068039 | Tcp1          | -0,282799989 | 0,00839 |
| ENSMUSG00000057396 | Zfp759        | 0,970009983  | 0,00839 |
| ENSMUSG00000030556 | Lrrc28        | 1,145020008  | 0,0084  |

|                     |               |              |         |
|---------------------|---------------|--------------|---------|
| ENSMUSG00000001576  | Ergic1        | -0,480300009 | 0,00842 |
| ENSMUSG000000027551 | Zfp64         | -0,333840013 | 0,00842 |
| ENSMUSG000000021922 | Itih4         | 1,566869974  | 0,00843 |
| ENSMUSG000000018566 | Slc2a4        | 2,753900051  | 0,00843 |
| ENSMUSG000000043243 | Fam129c       | -1,465420008 | 0,00844 |
| ENSMUSG000000063410 | Stk24         | -0,957899988 | 0,00847 |
| ENSMUSG000000038697 | Taf5l         | -0,351419985 | 0,00848 |
| ENSMUSG000000044876 | Zfp444        | 0,820060015  | 0,00848 |
| ENSMUSG000000068663 | Clec16a       | 0,873319983  | 0,00848 |
| ENSMUSG000000056656 | Apol8         | -4,337120056 | 0,0085  |
| ENSMUSG000000061099 | Gapdhs        | 0,951439977  | 0,0085  |
| ENSMUSG000000019843 | Fyn           | -0,817470014 | 0,00852 |
| ENSMUSG000000006476 | Nsmf          | 0,59928      | 0,00852 |
| ENSMUSG000000001173 | Ocr1          | -0,855790019 | 0,00853 |
| ENSMUSG000000043753 | Dmrta1        | -1,705790043 | 0,00856 |
| ENSMUSG000000035891 | Cerk          | -0,801530004 | 0,00856 |
| ENSMUSG000000002983 | Relb          | -1,165179968 | 0,00858 |
| ENSMUSG000000028121 | Bcar3         | 0,769240022  | 0,0086  |
| ENSMUSG000000041272 | Tox           | 1,156299949  | 0,0086  |
| ENSMUSG000000040463 | Mybbp1a       | -1,078770041 | 0,00862 |
| ENSMUSG000000043157 | Arl11         | -1,363109946 | 0,00863 |
| ENSMUSG000000021871 | Gm49342       | 0,818239987  | 0,00865 |
| ENSMUSG000000025592 | Dach2         | -5,470449924 | 0,00867 |
| ENSMUSG000000021819 | Zswim8        | -1,048699975 | 0,00869 |
| ENSMUSG000000038525 | Armc10        | -0,59416002  | 0,00869 |
| ENSMUSG000000062619 | 2310039H08Rik | 1,294109941  | 0,00869 |
| ENSMUSG000000029020 | Mfn2          | 0,638329983  | 0,0087  |
| ENSMUSG000000076433 | Cep295nl      | -6,42636013  | 0,00871 |
| ENSMUSG000000038500 | Prr3          | -0,896830022 | 0,00871 |
| ENSMUSG000000060935 | Tmem263       | -0,805729985 | 0,00872 |
| ENSMUSG000000057181 | 5730455P16Rik | 0,70915997   | 0,00875 |
| ENSMUSG000000049588 | Ccdc69        | 1,041350007  | 0,00876 |
| ENSMUSG000000024400 | Wdr33         | -0,336510003 | 0,00876 |
| ENSMUSG000000038366 | Lasp1         | -0,679669976 | 0,00877 |
| ENSMUSG000000034636 | Zyg11b        | 0,859740019  | 0,0088  |
| ENSMUSG000000020770 | Unk           | -0,586149991 | 0,0088  |
| ENSMUSG000000094845 | Tmem95        | -4,68803978  | 0,00881 |
| ENSMUSG000000047909 | Ankrd16       | -0,63102001  | 0,00881 |
| ENSMUSG000000004394 | Tmed4         | 0,379189998  | 0,00885 |
| ENSMUSG000000062075 | Lmn2          | -0,624800026 | 0,00886 |
| ENSMUSG000000033644 | Piwil2        | -1,895910025 | 0,00889 |
| ENSMUSG000000050730 | Arhgap42      | 0,822809994  | 0,0089  |
| ENSMUSG000000028637 | Ccdc30        | 0,76849997   | 0,00891 |
| ENSMUSG000000055128 | Cgrrf1        | 1,109009981  | 0,00891 |
| ENSMUSG000000029166 | Mapre3        | 0,498780012  | 0,00893 |
| ENSMUSG000000028699 | Tspan1        | -4,274050236 | 0,00895 |
| ENSMUSG000000007670 | Khsrp         | -0,765389979 | 0,00898 |



|                    |               |              |         |
|--------------------|---------------|--------------|---------|
| ENSMUSG00000022629 | Kif21a        | 0,979589999  | 0,00898 |
| ENSMUSG00000034192 | Lsm3          | -1,230540037 | 0,00899 |
| ENSMUSG00000030554 | Sym           | -1,499559999 | 0,00899 |
| ENSMUSG00000011171 | Vipr2         | -3,52602005  | 0,009   |
| ENSMUSG00000028809 | Srrm1         | -0,678349972 | 0,00901 |
| ENSMUSG00000045532 | C1ql1         | -5,789060116 | 0,00903 |
| ENSMUSG00000046329 | Slc25a23      | 1,542739987  | 0,00906 |
| ENSMUSG00000027506 | Tpd52         | -0,829930007 | 0,00908 |
| ENSMUSG00000016933 | Plcg1         | -0,660059988 | 0,00909 |
| ENSMUSG00000032598 | Nckipsd       | -0,456750005 | 0,00911 |
| ENSMUSG00000062590 | Armc9         | -0,713090003 | 0,00913 |
| ENSMUSG00000042772 | Smg7          | -0,499280006 | 0,00915 |
| ENSMUSG00000022948 | Setd4         | 1,09908998   | 0,00916 |
| ENSMUSG00000003778 | Brd8          | -0,911989987 | 0,00917 |
| ENSMUSG00000048402 | Gli2          | -4,614389896 | 0,00918 |
| ENSMUSG00000022905 | Kpna1         | 0,583660007  | 0,00921 |
| ENSMUSG00000066258 | Trim12a       | 0,659799993  | 0,00921 |
| ENSMUSG00000005982 | Naa60         | 1,202170014  | 0,00922 |
| ENSMUSG00000076609 | Igkc          | 1,381299973  | 0,00923 |
| ENSMUSG00000038541 | Srd5a2        | 1,965499997  | 0,00923 |
| ENSMUSG00000032349 | Elovl5        | 1,45472002   | 0,00923 |
| ENSMUSG00000050912 | Tmem123       | -0,44648999  | 0,00926 |
| ENSMUSG00000046207 | Pik3r6        | -1,128389955 | 0,00929 |
| ENSMUSG00000021217 | Tshz3         | -1,574650049 | 0,0093  |
| ENSMUSG00000023019 | Gpd1          | 1,480949998  | 0,0093  |
| ENSMUSG00000034156 | Tspoap1       | -2,439169884 | 0,00934 |
| ENSMUSG00000021357 | Exoc2         | -0,620419979 | 0,00934 |
| ENSMUSG00000074968 | Ano3          | -3,479269981 | 0,00936 |
| ENSMUSG00000034584 | Exph5         | 2,559809923  | 0,00936 |
| ENSMUSG00000041540 | Sox5          | 1,177299976  | 0,00937 |
| ENSMUSG00000044496 | 2510039O18Rik | -0,418339998 | 0,00937 |
| ENSMUSG00000059920 | 4930453N24Rik | 0,675880015  | 0,00938 |
| ENSMUSG00000053626 | Tll1          | -6,21171999  | 0,00941 |
| ENSMUSG00000030654 | Arl6ip1       | 0,476449996  | 0,00941 |
| ENSMUSG00000027427 | Polr3f        | -0,529779971 | 0,00943 |
| ENSMUSG00000038685 | Rtel1         | -0,638790011 | 0,00945 |
| ENSMUSG00000028978 | Nos3          | -0,685959995 | 0,00946 |
| ENSMUSG00000027957 | Slc35a3       | 0,723770022  | 0,00946 |
| ENSMUSG00000022681 | Ntan1         | -0,606060028 | 0,00947 |
| ENSMUSG00000024759 | Atl3          | 0,927860022  | 0,00947 |
| ENSMUSG00000020120 | Plek          | -0,856589973 | 0,00949 |
| ENSMUSG00000020802 | Ube2o         | -0,866659999 | 0,00952 |
| ENSMUSG00000020849 | Ywhae         | -0,379480004 | 0,00953 |
| ENSMUSG00000018411 | Mapt          | 1,161229968  | 0,00953 |
| ENSMUSG00000027801 | Tm4sf4        | 1,176069975  | 0,00953 |
| ENSMUSG00000079362 | Gm43302       | 1,551789999  | 0,00953 |
| ENSMUSG00000017288 | Vps53         | 0,40200001   | 0,00955 |

|                    |          |              |         |
|--------------------|----------|--------------|---------|
| ENSMUSG00000003617 | Cp       | 1,327139974  | 0,0096  |
| ENSMUSG00000027577 | Chrna4   | 2,418080091  | 0,00961 |
| ENSMUSG00000042846 | Lrrtm3   | -6,216030121 | 0,00967 |
| ENSMUSG00000021072 | Tmx1     | -0,551789999 | 0,00968 |
| ENSMUSG00000020190 | Mknk2    | 0,56704998   | 0,00968 |
| ENSMUSG00000027304 | Rtf1     | -0,446630001 | 0,0097  |
| ENSMUSG00000072640 | Lym9     | 0,717930019  | 0,0097  |
| ENSMUSG00000022529 | Zfp263   | -0,754180014 | 0,00971 |
| ENSMUSG00000053799 | Exoc6    | 0,66316998   | 0,00972 |
| ENSMUSG00000038692 | Hoxb4    | -1,376870036 | 0,00972 |
| ENSMUSG00000072115 | Ang      | 1,759549975  | 0,00973 |
| ENSMUSG00000027552 | E2f5     | -0,622839987 | 0,00975 |
| ENSMUSG00000031700 | Gpt2     | 1,240229964  | 0,00975 |
| ENSMUSG00000039110 | Mycbpap  | -2,171459913 | 0,00977 |
| ENSMUSG00000027739 | Rab33b   | -0,459549993 | 0,00977 |
| ENSMUSG00000000903 | Vpreb3   | 2,294159889  | 0,00978 |
| ENSMUSG00000015243 | Abca1    | 1,036139965  | 0,00979 |
| ENSMUSG00000075486 | Commd6   | 0,726580024  | 0,00979 |
| ENSMUSG00000066000 | Zfp979   | 1,622040033  | 0,0098  |
| ENSMUSG00000050097 | Ces2b    | 2,785919905  | 0,0098  |
| ENSMUSG00000077737 | Snord72  | -1,729480028 | 0,00981 |
| ENSMUSG00000015357 | Clpx     | 1,121799946  | 0,00981 |
| ENSMUSG00000021983 | Atp8a2   | -2,325299978 | 0,00982 |
| ENSMUSG00000029417 | Cxcl9    | 1,989560008  | 0,00982 |
| ENSMUSG00000025933 | Tmem14a  | 0,80971998   | 0,00982 |
| ENSMUSG00000021999 | Cpb2     | 1,518290043  | 0,00982 |
| ENSMUSG00000031996 | Aplp2    | -0,471679986 | 0,00983 |
| ENSMUSG00000021973 | Micu2    | 0,557550013  | 0,00984 |
| ENSMUSG00000018599 | Mief2    | 0,756290019  | 0,00985 |
| ENSMUSG00000027610 | Gss      | 0,957970023  | 0,00985 |
| ENSMUSG00000020661 | Dnmt3a   | -0,899940014 | 0,00986 |
| ENSMUSG00000026849 | Tor1a    | 0,645669997  | 0,00986 |
| ENSMUSG00000028249 | Sdcbp    | -0,55013001  | 0,00987 |
| ENSMUSG00000030322 | Mbd4     | -1,096979976 | 0,00988 |
| ENSMUSG00000034684 | Sema3f   | -0,993939996 | 0,00988 |
| ENSMUSG00000027223 | Mapk8ip1 | -1,261690021 | 0,00993 |
| ENSMUSG00000028080 | Lrba     | 1,003690004  | 0,00994 |
| ENSMUSG00000005045 | Chd5     | -3,243119955 | 0,00996 |
| ENSMUSG00000030802 | Bckdk    | -0,83484     | 0,00998 |
| ENSMUSG00000041774 | Ydjc     | -1,404989958 | 0,00998 |
| ENSMUSG00000042349 | Ikbke    | 0,965539992  | 0,00999 |
| ENSMUSG00000017776 | Crk      | -0,246790007 | 0,01    |
| ENSMUSG00000028433 | Ubap2    | -0,928330004 | 0,01001 |
| ENSMUSG00000004788 | Eif2b2   | -0,761039972 | 0,01002 |
| ENSMUSG00000016427 | Ndufa1   | 1,233669996  | 0,01004 |
| ENSMUSG00000023940 | Sgo1     | -1,669029951 | 0,01004 |
| ENSMUSG00000057440 | Mpp7     | 0,688199997  | 0,01009 |

|                    |               |              |         |
|--------------------|---------------|--------------|---------|
| ENSMUSG00000079608 | Stard6        | -1,582129955 | 0,0101  |
| ENSMUSG00000022312 | Eif3h         | -0,562279999 | 0,01012 |
| ENSMUSG00000047735 | Samd9l        | 1,403290033  | 0,01012 |
| ENSMUSG00000071657 | Bscl2         | 1,124600053  | 0,01014 |
| ENSMUSG00000037266 | Rsrp1         | 0,552349985  | 0,01015 |
| ENSMUSG00000020955 | Ap4s1         | 1,017470002  | 0,01016 |
| ENSMUSG00000025178 | Pi4k2a        | 0,452800006  | 0,01016 |
| ENSMUSG00000019579 | Mydgf         | 0,734210014  | 0,01016 |
| ENSMUSG00000042678 | Myo15         | -3,247210026 | 0,01017 |
| ENSMUSG00000020467 | Efemp1        | -1,24477005  | 0,01017 |
| ENSMUSG00000061589 | Dot1l         | -1,099290013 | 0,01017 |
| ENSMUSG00000057531 | Dtnbp1        | 0,790189981  | 0,01017 |
| ENSMUSG00000046959 | Slc26a1       | 1,907899976  | 0,01018 |
| ENSMUSG00000005417 | Mprip         | -0,71675998  | 0,01021 |
| ENSMUSG00000023944 | Hsp90ab1      | -0,404729992 | 0,01021 |
| ENSMUSG00000029363 | Rfc5          | -0,601130009 | 0,01022 |
| ENSMUSG00000027546 | Atp9a         | 1,03263998   | 0,01022 |
| ENSMUSG00000038146 | Notch3        | -1,512910008 | 0,01026 |
| ENSMUSG00000018239 | Zcchc10       | -0,960489988 | 0,01026 |
| ENSMUSG00000022434 | Fam118a       | -0,721859992 | 0,01026 |
| ENSMUSG00000035948 | Acss3         | 2,311589956  | 0,01027 |
| ENSMUSG00000032264 | Zw10          | -0,670149982 | 0,01028 |
| ENSMUSG00000025612 | Bach1         | 0,848219991  | 0,01028 |
| ENSMUSG00000008475 | Arpc5         | -0,607620001 | 0,01029 |
| ENSMUSG00000028706 | Nsun4         | 0,739459991  | 0,0103  |
| ENSMUSG00000080364 | Gm25777       | -2,752799988 | 0,01031 |
| ENSMUSG00000025733 | Rhot2         | 0,355100006  | 0,01031 |
| ENSMUSG00000028868 | Wasf2         | -0,641420007 | 0,01033 |
| ENSMUSG00000016758 | Bik           | 1,242300034  | 0,01033 |
| ENSMUSG00000027357 | Crls1         | 0,794879973  | 0,01034 |
| ENSMUSG00000038121 | Fam210a       | 0,867919981  | 0,01034 |
| ENSMUSG00000033249 | Hsf4          | 0,751039982  | 0,01036 |
| ENSMUSG00000071112 | Spx           | -3,407069921 | 0,01036 |
| ENSMUSG00000039202 | Abhd2         | 0,766089976  | 0,01037 |
| ENSMUSG00000030541 | Idh2          | 0,52621001   | 0,01043 |
| ENSMUSG00000035235 | Trim13        | -0,633440018 | 0,01043 |
| ENSMUSG00000051037 | Zfp455        | 0,854799986  | 0,01043 |
| ENSMUSG00000067889 | Sptbn2        | 1,495390058  | 0,01044 |
| ENSMUSG00000021552 | Gkap1         | 0,560580015  | 0,01046 |
| ENSMUSG00000015711 | Prune1        | -0,439170003 | 0,01046 |
| ENSMUSG00000020521 | Rnft1         | 0,503719985  | 0,01047 |
| ENSMUSG00000072664 | Ugt3a1        | 1,925079942  | 0,01048 |
| ENSMUSG00000022407 | Adsl          | -0,447210014 | 0,01048 |
| ENSMUSG00000028830 | AU040320      | 0,583980024  | 0,01048 |
| ENSMUSG00000051435 | Fhad1         | 1,185490012  | 0,01049 |
| ENSMUSG00000071176 | Arhgef10      | -1,149479985 | 0,01052 |
| ENSMUSG00000049760 | 2410015M20Rik | 0,80892998   | 0,01052 |

|                    |          |              |         |
|--------------------|----------|--------------|---------|
| ENSMUSG00000027474 | Ccm2l    | 0,858169973  | 0,01052 |
| ENSMUSG00000051378 | Kif18b   | -2,026760101 | 0,01054 |
| ENSMUSG00000018761 | Mpdu1    | 1,035529971  | 0,01054 |
| ENSMUSG00000042520 | Ubap2l   | -0,947860003 | 0,01056 |
| ENSMUSG00000023393 | Slc17a9  | 1,085590005  | 0,01056 |
| ENSMUSG00000028049 | Scamp3   | -0,282240003 | 0,01057 |
| ENSMUSG00000058230 | Arhgap35 | 0,965610027  | 0,01057 |
| ENSMUSG00000015880 | Ncapg    | -1,886250019 | 0,01062 |
| ENSMUSG00000037921 | Ddx60    | 1,276360035  | 0,01063 |
| ENSMUSG00000063524 | Eno1     | -0,794619977 | 0,01064 |
| ENSMUSG00000075707 | Dio3     | -3,024950027 | 0,01064 |
| ENSMUSG00000039826 | Trub2    | -0,538600028 | 0,01064 |
| ENSMUSG00000021573 | Tppp     | 1,383810043  | 0,01064 |
| ENSMUSG00000025314 | Ptprj    | 0,85631001   | 0,01065 |
| ENSMUSG00000034206 | Polq     | -1,740399957 | 0,01066 |
| ENSMUSG00000019883 | Echdc1   | 1,97634995   | 0,01067 |
| ENSMUSG00000030703 | Gdpd3    | -1,389680028 | 0,01067 |
| ENSMUSG00000022999 | Lmbr1l   | -0,623589993 | 0,0107  |
| ENSMUSG00000011832 | Evi5l    | -0,842939973 | 0,01072 |
| ENSMUSG00000002633 | Shh      | 3,326740026  | 0,01072 |
| ENSMUSG00000023965 | Fbxl17   | 0,33247      | 0,01074 |
| ENSMUSG00000006276 | Eps15l1  | -0,803229988 | 0,01076 |
| ENSMUSG00000019297 | Nop9     | -0,275759995 | 0,01077 |
| ENSMUSG00000001761 | Smo      | -1,179700017 | 0,01078 |
| ENSMUSG00000050332 | Amer1    | -0,938489974 | 0,01079 |
| ENSMUSG00000022218 | Tgm1     | 1,150699973  | 0,01079 |
| ENSMUSG00000028969 | Cdk5     | -0,762430012 | 0,01082 |
| ENSMUSG00000040660 | Cyp2b9   | 3,098680019  | 0,01082 |
| ENSMUSG00000044991 | Shid1    | 1,066619992  | 0,01089 |
| ENSMUSG00000021650 | Ptcd2    | 0,539479971  | 0,0109  |
| ENSMUSG00000029050 | Ski      | -0,882380009 | 0,01093 |
| ENSMUSG00000060591 | Ifitm2   | 0,664210021  | 0,01095 |
| ENSMUSG00000041329 | Atp1b2   | -1,841210008 | 0,01096 |
| ENSMUSG00000021795 | Sftpd    | -0,904980004 | 0,01096 |
| ENSMUSG00000024027 | Glp1r    | -8,388750076 | 0,01097 |
| ENSMUSG00000042298 | Ttc19    | 0,295780003  | 0,01098 |
| ENSMUSG00000029446 | Psph     | 0,557730019  | 0,01099 |
| ENSMUSG00000002129 | Sf3a1    | -0,64279002  | 0,01101 |
| ENSMUSG00000023045 | Soat2    | 1,124259949  | 0,01103 |
| ENSMUSG00000025037 | Maoa     | -0,71638     | 0,01104 |
| ENSMUSG00000048280 | Zfp738   | -0,738409996 | 0,01104 |
| ENSMUSG00000040298 | Btbd16   | -4,237750053 | 0,01105 |
| ENSMUSG00000029249 | Rest     | -0,587890029 | 0,01105 |
| ENSMUSG00000030876 | Mettl9   | 0,593500018  | 0,01105 |
| ENSMUSG00000025264 | Tsr2     | 0,565970004  | 0,01108 |
| ENSMUSG00000035551 | Igfbpl1  | -3,046550035 | 0,01109 |
| ENSMUSG00000019927 | Ube2d1   | -0,790009975 | 0,01109 |

|                     |          |              |         |
|---------------------|----------|--------------|---------|
| ENSMUSG00000051306  | Usp42    | -0,773039997 | 0,01109 |
| ENSMUSG00000032329  | Hmg20a   | -0,664340019 | 0,0111  |
| ENSMUSG00000079298  | Klrb1b   | 1,769019961  | 0,0111  |
| ENSMUSG00000034795  | Ccdc122  | 0,717159986  | 0,01111 |
| ENSMUSG00000026999  | Nup35    | -0,732980013 | 0,01112 |
| ENSMUSG00000096145  | Vkorc1   | 0,975279987  | 0,01115 |
| ENSMUSG00000011305  | Plin5    | 1,333080053  | 0,01117 |
| ENSMUSG00000037579  | Kcnh3    | -2,961090088 | 0,01118 |
| ENSMUSG00000015714  | Cers2    | 0,688049972  | 0,01119 |
| ENSMUSG00000020057  | Dram1    | -0,903850019 | 0,0112  |
| ENSMUSG00000023046  | Igfbp6   | -1,882619977 | 0,01124 |
| ENSMUSG00000020671  | Rab10    | -0,440210015 | 0,01126 |
| ENSMUSG00000019278  | Dpep1    | -2,688339949 | 0,01128 |
| ENSMUSG00000024260  | Sap130   | -0,789409995 | 0,01128 |
| ENSMUSG00000020346  | Mgat1    | 0,617680013  | 0,01131 |
| ENSMUSG00000030515  | Tarsl2   | 0,705060005  | 0,01131 |
| ENSMUSG00000002608  | Ccdc97   | -0,268359989 | 0,01132 |
| ENSMUSG00000044296  | Zfp879   | 2,148479939  | 0,01132 |
| ENSMUSG00000036112  | Metap2   | -0,507459998 | 0,01133 |
| ENSMUSG00000029670  | Ing3     | -0,510070026 | 0,01133 |
| ENSMUSG00000020782  | Ligl2    | 0,86838001   | 0,01134 |
| ENSMUSG00000006392  | Med8     | 0,787479997  | 0,01134 |
| ENSMUSG00000019989  | Enpp3    | 1,350510001  | 0,01134 |
| ENSMUSG00000033632  | AW554918 | -0,980799973 | 0,01136 |
| ENSMUSG00000039914  | Coq10a   | 0,682259977  | 0,01137 |
| ENSMUSG00000084128  | Esrp2    | 1,438580036  | 0,01137 |
| ENSMUSG00000054079  | Utp18    | -0,571219981 | 0,01137 |
| ENSMUSG00000027671  | Actl6a   | -0,632830024 | 0,01139 |
| ENSMUSG00000042211  | Fbxo38   | -0,450199991 | 0,01139 |
| ENSMUSG00000000686  | Abhd15   | 1,449180007  | 0,01139 |
| ENSMUSG00000028518  | Prkaa2   | 1,518079996  | 0,01146 |
| ENSMUSG00000028345  | Tex10    | -0,801680028 | 0,01147 |
| ENSMUSG00000027259  | Adal     | 0,988810003  | 0,01152 |
| ENSMUSG00000019889  | Ptprk    | 0,499790013  | 0,01153 |
| ENSMUSG00000031714  | Gab1     | 0,754079998  | 0,01156 |
| ENSMUSG00000041698  | Slco1a1  | 1,978770018  | 0,01156 |
| ENSMUSG00000047604  | Frat2    | -1,021639943 | 0,01157 |
| ENSMUSG00000028793  | Rnf19b   | -0,458359987 | 0,01157 |
| ENSMUSG00000000805  | Car4     | -6,17553997  | 0,01158 |
| ENSMUSG00000020530  | Ggnbp2   | 0,321179986  | 0,01158 |
| ENSMUSG00000034300  | Fam53c   | -0,905659974 | 0,01161 |
| ENSMUSG00000005683  | Cs       | -0,430209994 | 0,01161 |
| ENSMUSG000000058921 | Slc10a5  | 2,943530083  | 0,01161 |
| ENSMUSG00000033590  | Myo5c    | -2,088670015 | 0,01162 |
| ENSMUSG00000042063  | Zfp386   | -0,5176      | 0,01162 |
| ENSMUSG00000064351  | mt-Co1   | 0,900659978  | 0,01165 |
| ENSMUSG00000032854  | Ugt8a    | -2,434109926 | 0,01166 |

|                    |          |              |         |
|--------------------|----------|--------------|---------|
| ENSMUSG00000019254 | Ppp1r12c | -0,383670002 | 0,01166 |
| ENSMUSG00000047497 | Adamts12 | -3,460769892 | 0,01167 |
| ENSMUSG00000030199 | Etv6     | -0,826330006 | 0,01168 |
| ENSMUSG00000005800 | Mmp8     | -2,783370018 | 0,01168 |
| ENSMUSG00000022299 | Slc25a32 | 0,679400027  | 0,01171 |
| ENSMUSG00000025225 | Nfkb2    | -1,135169983 | 0,01175 |
| ENSMUSG00000038127 | Ccdc50   | 0,565550029  | 0,01177 |
| ENSMUSG00000046589 | Lrrc8e   | -1,34702003  | 0,01179 |
| ENSMUSG00000038132 | Rbm24    | 4,504389763  | 0,01179 |
| ENSMUSG00000000631 | Myo18a   | 0,779500008  | 0,0118  |
| ENSMUSG00000028333 | Anp32b   | -0,68246001  | 0,01182 |
| ENSMUSG00000027966 | Col11a1  | -10,85375023 | 0,01184 |
| ENSMUSG00000023781 | Hes7     | -2,970249891 | 0,01185 |
| ENSMUSG00000058216 | Gstp3    | 1,528470039  | 0,01187 |
| ENSMUSG00000044894 | Uqcrq    | 1,311990023  | 0,01188 |
| ENSMUSG00000033961 | Zfp446   | 0,637160003  | 0,01191 |
| ENSMUSG00000039577 | Nphp4    | -2,510570049 | 0,01191 |
| ENSMUSG00000065362 | Gm24411  | -3,051800013 | 0,01192 |
| ENSMUSG00000069378 | Prdm6    | -3,007479906 | 0,01194 |
| ENSMUSG00000022389 | Tef      | 1,212389946  | 0,01195 |
| ENSMUSG00000035397 | Klf16    | -0,818369985 | 0,01196 |
| ENSMUSG00000024856 | Cdk2ap2  | 0,599799991  | 0,01199 |
| ENSMUSG00000014542 | Clec4f   | 1,548859954  | 0,01199 |
| ENSMUSG00000025364 | Pa2g4    | -0,450830013 | 0,01202 |
| ENSMUSG00000034160 | Ogt      | -0,923609972 | 0,01203 |
| ENSMUSG00000026842 | Abl1     | -0,781679988 | 0,01203 |
| ENSMUSG00000028779 | Pef1     | 0,648790002  | 0,01203 |
| ENSMUSG00000033998 | Kcnk1    | -1,77681005  | 0,01204 |
| ENSMUSG00000049922 | Slc35c1  | 0,688750029  | 0,01204 |
| ENSMUSG00000005947 | Itgae    | -1,74364996  | 0,01206 |
| ENSMUSG00000025932 | Eya1     | -6,811890125 | 0,01207 |
| ENSMUSG00000090124 | Ugt1a7c  | -2,179879904 | 0,01212 |
| ENSMUSG00000026421 | Csrp1    | -1,052749991 | 0,01213 |
| ENSMUSG00000029422 | Rsrc2    | -0,432920009 | 0,01213 |
| ENSMUSG00000034919 | Ttc22    | -2,706739902 | 0,01214 |
| ENSMUSG00000074923 | Pak6     | -1,67809999  | 0,01216 |
| ENSMUSG00000022876 | Samsn1   | -1,312549949 | 0,01221 |
| ENSMUSG00000070803 | Cited4   | -2,119999886 | 0,01225 |
| ENSMUSG00000003810 | Mast2    | -0,639940023 | 0,01226 |
| ENSMUSG00000022787 | Wdr53    | 0,901639998  | 0,01229 |
| ENSMUSG00000066687 | Zbtb16   | 2,160850048  | 0,0123  |
| ENSMUSG00000036172 | Cd200r3  | -2,946049929 | 0,01231 |
| ENSMUSG00000028402 | Mpdz     | 0,644649982  | 0,01232 |
| ENSMUSG00000039461 | Tcta     | 0,521510005  | 0,01234 |
| ENSMUSG00000054728 | Phactr1  | -1,249150038 | 0,01235 |
| ENSMUSG00000034022 | Cpsf1    | 0,348199993  | 0,01238 |
| ENSMUSG00000031133 | Arhgef6  | -0,820159972 | 0,01246 |

|                    |               |              |         |
|--------------------|---------------|--------------|---------|
| ENSMUSG00000032840 | 2410131K14Rik | -0,455179989 | 0,01246 |
| ENSMUSG00000032046 | Abhd12        | -0,347030014 | 0,01246 |
| ENSMUSG00000032766 | Gng11         | -1,473219991 | 0,01248 |
| ENSMUSG00000042029 | Ncapg2        | -0,970449984 | 0,01248 |
| ENSMUSG00000037649 | H2-DMa        | -1,213660002 | 0,01249 |
| ENSMUSG00000009013 | Dynll1        | -1,178179979 | 0,01249 |
| ENSMUSG00000036167 | Pphln1        | -0,50801003  | 0,01249 |
| ENSMUSG00000027177 | Hipk3         | 0,602169991  | 0,01249 |
| ENSMUSG00000024807 | Syvn1         | 0,922349989  | 0,01253 |
| ENSMUSG00000042793 | Lgr6          | -10,63265991 | 0,01256 |
| ENSMUSG00000027222 | Pex16         | 1,251999974  | 0,01256 |
| ENSMUSG00000079598 | Clec2l        | -3,271529913 | 0,01259 |
| ENSMUSG00000039683 | Sdk1          | -1,668280005 | 0,01259 |
| ENSMUSG00000026725 | Tnn           | -6,836299896 | 0,0126  |
| ENSMUSG00000053113 | Socs3         | -1,49416995  | 0,01261 |
| ENSMUSG00000033953 | Ppp3r1        | -0,60017997  | 0,01262 |
| ENSMUSG00000027459 | Fam110a       | -0,971010029 | 0,01265 |
| ENSMUSG00000087370 | Tmem170b      | 0,602400005  | 0,01265 |
| ENSMUSG00000000275 | Trim25        | 0,678979993  | 0,01265 |
| ENSMUSG00000055681 | Cope          | 0,717390001  | 0,01267 |
| ENSMUSG00000026102 | Inpp1         | 0,871930003  | 0,01267 |
| ENSMUSG00000063929 | Cyp4a32       | 1,591179967  | 0,01268 |
| ENSMUSG00000040936 | Ulk4          | -1,814800024 | 0,01268 |
| ENSMUSG00000015202 | Cnksr3        | -0,93787998  | 0,01269 |
| ENSMUSG00000030083 | Abtb1         | 0,568589985  | 0,01271 |
| ENSMUSG00000006777 | Krt23         | 1,351140022  | 0,01272 |
| ENSMUSG00000005410 | Mcm5          | -0,976329982 | 0,01273 |
| ENSMUSG00000001435 | Col18a1       | 0,783550024  | 0,01278 |
| ENSMUSG00000026014 | Raph1         | 1,188150048  | 0,01278 |
| ENSMUSG00000040703 | Cyp2s1        | -2,194950104 | 0,01278 |
| ENSMUSG00000061759 | Armt1         | 0,396479994  | 0,01279 |
| ENSMUSG00000060716 | Plekhh1       | -2,556139946 | 0,0128  |
| ENSMUSG00000021242 | Npc2          | -0,953920007 | 0,01282 |
| ENSMUSG00000026117 | Zap70         | 1,657259941  | 0,01284 |
| ENSMUSG00000031217 | Efnb1         | -0,659150004 | 0,01285 |
| ENSMUSG00000020623 | Map2k6        | -1,24635005  | 0,01288 |
| ENSMUSG00000017421 | Zfp207        | -0,231749997 | 0,01289 |
| ENSMUSG00000038344 | Txlng         | 0,847930014  | 0,01289 |
| ENSMUSG00000041765 | Ubac2         | 0,287750006  | 0,0129  |
| ENSMUSG00000069237 | Fam8a1        | 0,48179999   | 0,0129  |
| ENSMUSG00000032126 | Hmbs          | 0,970489979  | 0,0129  |
| ENSMUSG00000020368 | Canx          | 0,345869988  | 0,01291 |
| ENSMUSG00000026167 | Wnt10a        | -4,525129795 | 0,01291 |
| ENSMUSG00000038578 | Susd1         | 0,722069979  | 0,01292 |
| ENSMUSG00000021285 | Ppp1r13b      | 0,573899984  | 0,01293 |
| ENSMUSG00000039842 | Mcph1         | -0,719900012 | 0,01294 |
| ENSMUSG00000054723 | Vmac          | 0,785969973  | 0,01294 |



|                    |          |              |         |
|--------------------|----------|--------------|---------|
| ENSMUSG00000073968 | Trim68   | 0,934409976  | 0,01296 |
| ENSMUSG00000026918 | Brd3     | -0,653419971 | 0,01298 |
| ENSMUSG00000042742 | Bmt2     | -0,398660004 | 0,01298 |
| ENSMUSG00000037643 | Prkci    | -0,626320004 | 0,01301 |
| ENSMUSG00000025497 | Cdhr5    | 1,574769974  | 0,01302 |
| ENSMUSG00000044505 | Lingo4   | 2,029350042  | 0,01304 |
| ENSMUSG00000045045 | Lrfr4    | -1,640239954 | 0,01304 |
| ENSMUSG00000030666 | Calcb    | -5,443329811 | 0,01306 |
| ENSMUSG00000032563 | Mrpl3    | -0,372040004 | 0,01306 |
| ENSMUSG00000045817 | Zfp36l2  | -0,994480014 | 0,01311 |
| ENSMUSG00000027944 | Hax1     | 0,700869977  | 0,01312 |
| ENSMUSG00000027677 | Ttc14    | -0,750739992 | 0,0132  |
| ENSMUSG00000047221 | Fam185a  | 0,590080023  | 0,01321 |
| ENSMUSG00000056812 | St8sia3  | -1,833899975 | 0,01324 |
| ENSMUSG00000021559 | Dapk1    | 1,45370996   | 0,01324 |
| ENSMUSG00000003484 | Cyp4f18  | -1,445350051 | 0,01325 |
| ENSMUSG00000078786 | BC024978 | 0,692640007  | 0,01326 |
| ENSMUSG00000046805 | Mpeg1    | 1,207559943  | 0,01326 |
| ENSMUSG00000040272 | Accs     | -0,494610012 | 0,01329 |
| ENSMUSG00000067813 | Xkr9     | 1,544219971  | 0,01329 |
| ENSMUSG00000032932 | Hspa13   | 0,657989979  | 0,0133  |
| ENSMUSG00000025816 | Sec61a2  | -1,841539979 | 0,01331 |
| ENSMUSG00000001504 | Irx2     | -8,103489876 | 0,01335 |
| ENSMUSG00000037818 | Abhd18   | 1,04914999   | 0,01338 |
| ENSMUSG00000032305 | Fam219b  | -0,299820006 | 0,01339 |
| ENSMUSG00000034792 | Gna15    | -1,164000034 | 0,0134  |
| ENSMUSG00000001089 | Luzp1    | -0,793489993 | 0,01342 |
| ENSMUSG00000020806 | Rhbdf2   | -0,568059981 | 0,01342 |
| ENSMUSG00000052949 | Rnf157   | -0,927829981 | 0,01344 |
| ENSMUSG00000024454 | Hdac3    | -0,669690013 | 0,01344 |
| ENSMUSG00000020705 | Ddx42    | -0,311960012 | 0,01346 |
| ENSMUSG00000034462 | Pkd2     | -0,932630002 | 0,01348 |
| ENSMUSG00000029151 | Slc30a3  | 1,699489951  | 0,01348 |
| ENSMUSG00000042293 | Gm5617   | 1,467350006  | 0,01351 |
| ENSMUSG00000017950 | Hnf4a    | 1,533149958  | 0,01352 |
| ENSMUSG00000025154 | Arhgap19 | -0,69066     | 0,01354 |
| ENSMUSG00000018900 | Slc22a5  | 0,615149975  | 0,01354 |
| ENSMUSG00000042064 | Myo3b    | -4,446750164 | 0,01355 |
| ENSMUSG00000021061 | Sptb     | -1,386620045 | 0,01356 |
| ENSMUSG00000070939 | Tgfbrap1 | 0,872160017  | 0,01357 |
| ENSMUSG00000030806 | Stx1b    | 1,48281002   | 0,01359 |
| ENSMUSG00000009108 | Gnat2    | 1,064090014  | 0,0136  |
| ENSMUSG00000040016 | Ptger3   | -2,937880039 | 0,01361 |
| ENSMUSG00000024014 | Pim1     | -1,068279982 | 0,01361 |
| ENSMUSG00000046556 | Zfp319   | -0,712800026 | 0,01361 |
| ENSMUSG00000038126 | Mphosph9 | -0,709500015 | 0,01361 |
| ENSMUSG00000009630 | Ppp2cb   | -0,696770012 | 0,01361 |

|                    |               |              |         |
|--------------------|---------------|--------------|---------|
| ENSMUSG00000031431 | Tsc22d3       | 1,090569973  | 0,01363 |
| ENSMUSG00000050315 | Synpo2        | -1,687139988 | 0,01364 |
| ENSMUSG00000020718 | Polg2         | 0,816179991  | 0,01368 |
| ENSMUSG00000053044 | Cd8b1         | 1,620810032  | 0,01373 |
| ENSMUSG00000062981 | Mrpl42        | 0,628970027  | 0,01374 |
| ENSMUSG00000022671 | Mzt2          | 1,044759989  | 0,01374 |
| ENSMUSG00000026614 | Slc30a10      | 1,636950016  | 0,01375 |
| ENSMUSG00000034403 | Pja1          | 0,280900002  | 0,01376 |
| ENSMUSG00000021497 | Txndc15       | 0,806710005  | 0,01376 |
| ENSMUSG00000028820 | Sfpq          | -0,503130019 | 0,01377 |
| ENSMUSG00000042340 | Ctf1          | 0,999000013  | 0,01377 |
| ENSMUSG00000025240 | Sacm1l        | 0,666170001  | 0,01378 |
| ENSMUSG00000019470 | Xab2          | -0,406300008 | 0,0138  |
| ENSMUSG00000042404 | Dennd4b       | -0,480769992 | 0,01381 |
| ENSMUSG00000027108 | Ola1          | -0,51801002  | 0,01383 |
| ENSMUSG00000022175 | Lrp10         | -0,392940015 | 0,01383 |
| ENSMUSG00000075600 | Zc3h3         | -0,846589983 | 0,01384 |
| ENSMUSG00000022420 | Dnal4         | -0,780889988 | 0,01388 |
| ENSMUSG00000030986 | Dhx32         | 0,925059974  | 0,01388 |
| ENSMUSG00000050240 | Hic2          | -1,154129982 | 0,01392 |
| ENSMUSG00000025220 | Mgea5         | -0,533599973 | 0,01392 |
| ENSMUSG00000038518 | Jarid2        | -0,66227001  | 0,01393 |
| ENSMUSG00000030854 | Ptpn5         | -5,02008009  | 0,01396 |
| ENSMUSG00000041324 | Inhba         | -2,167959929 | 0,01398 |
| ENSMUSG00000025757 | Hspa4l        | -0,920580029 | 0,01399 |
| ENSMUSG00000023961 | Enpp4         | 0,856190026  | 0,014   |
| ENSMUSG00000039754 | Alkbh4        | -0,581579983 | 0,01401 |
| ENSMUSG00000027868 | Tbx15         | -6,346650124 | 0,01403 |
| ENSMUSG00000038768 | 9130409I23Rik | 1,389520049  | 0,01403 |
| ENSMUSG00000027306 | Nusap1        | -1,120390058 | 0,01405 |
| ENSMUSG00000027652 | Ralgapb       | -0,989489973 | 0,01405 |
| ENSMUSG00000044702 | Palb2         | -1,055619955 | 0,01406 |
| ENSMUSG00000029076 | Sdf4          | 0,501909971  | 0,01407 |
| ENSMUSG00000028782 | Adgrb2        | -3,800839901 | 0,0141  |
| ENSMUSG00000030131 | Mug2          | 1,664139986  | 0,01411 |
| ENSMUSG00000020794 | Ube2g1        | 0,212940007  | 0,01412 |
| ENSMUSG00000015542 | Nat9          | 0,976549983  | 0,01413 |
| ENSMUSG00000011263 | Exoc3l2       | 0,988950014  | 0,01413 |
| ENSMUSG00000061979 | Rcc1l         | 0,503610015  | 0,01416 |
| ENSMUSG00000025047 | Pdcd11        | -0,640269995 | 0,01416 |
| ENSMUSG00000027569 | Mrgbp         | -0,487260014 | 0,01419 |
| ENSMUSG00000022537 | Tmem44        | 0,818189979  | 0,01419 |
| ENSMUSG00000005980 | Dnase1        | -1,567209959 | 0,0142  |
| ENSMUSG00000041679 | Lrrc29        | 0,827180028  | 0,01421 |
| ENSMUSG00000035984 | Nme5          | -2,093719959 | 0,01422 |
| ENSMUSG00000021670 | Hmgcr         | 1,045429945  | 0,01422 |
| ENSMUSG00000035873 | Pawr          | 0,784889996  | 0,01423 |

|                    |               |              |         |
|--------------------|---------------|--------------|---------|
| ENSMUSG00000057895 | Zfp105        | -1,225579977 | 0,01423 |
| ENSMUSG00000032239 | Rp9           | 0,56803      | 0,01425 |
| ENSMUSG00000027439 | Gzf1          | 0,502340019  | 0,01427 |
| ENSMUSG00000037685 | Atp8a1        | -0,588379979 | 0,01431 |
| ENSMUSG00000006423 | C330007P06Rik | 0,423940003  | 0,01431 |
| ENSMUSG00000028890 | Mtf1          | 0,57960999   | 0,01432 |
| ENSMUSG00000006169 | Clint1        | 0,570259988  | 0,01433 |
| ENSMUSG00000026303 | Mlph          | -1,180430055 | 0,01434 |
| ENSMUSG00000020315 | Sptbn1        | -1,07238996  | 0,01437 |
| ENSMUSG00000015733 | Capza2        | -0,359789997 | 0,01438 |
| ENSMUSG00000027006 | Dnajc10       | -0,537609994 | 0,0144  |
| ENSMUSG00000045790 | Ccdc149       | 1,069399953  | 0,0144  |
| ENSMUSG00000044197 | Gpr146        | 1,165169954  | 0,0144  |
| ENSMUSG00000044393 | Dsg2          | 1,541689992  | 0,01441 |
| ENSMUSG00000027997 | Casp6         | -0,684920013 | 0,01442 |
| ENSMUSG00000038451 | Spsb2         | 0,842850029  | 0,01442 |
| ENSMUSG00000035245 | Eogt          | -0,544700027 | 0,01444 |
| ENSMUSG00000041750 | Cd1d2         | 1,621979952  | 0,01444 |
| ENSMUSG00000024927 | Rela          | -0,386099994 | 0,01445 |
| ENSMUSG00000003882 | Ii7r          | -1,382879972 | 0,01446 |
| ENSMUSG00000039518 | Cdsn          | -2,941509962 | 0,01447 |
| ENSMUSG00000027667 | Zfp639        | -0,542180002 | 0,01451 |
| ENSMUSG00000067199 | Frat1         | 1,105859995  | 0,01451 |
| ENSMUSG00000066512 | Klk1b5        | 3,178770065  | 0,01451 |
| ENSMUSG00000030188 | Magohb        | -1,327579975 | 0,01456 |
| ENSMUSG00000018846 | Pank3         | 0,583620012  | 0,01456 |
| ENSMUSG00000053930 | Shisa6        | -2,730940104 | 0,01457 |
| ENSMUSG00000019689 | Fmc1          | 1,532920003  | 0,01457 |
| ENSMUSG00000077426 | Gm26387       | -2,332329988 | 0,01463 |
| ENSMUSG00000021520 | Uqcrb         | 0,844190001  | 0,01465 |
| ENSMUSG00000071014 | Ndufb6        | 0,998430014  | 0,01465 |
| ENSMUSG00000026409 | Pfkfb2        | 0,895190001  | 0,01471 |
| ENSMUSG00000029075 | Tnfrsf4       | -1,898390055 | 0,01473 |
| ENSMUSG00000092300 | Cdk3-ps       | -2,430779934 | 0,01474 |
| ENSMUSG00000033831 | Fgb           | 1,422799945  | 0,01478 |
| ENSMUSG00000054003 | Tdrd9         | -6,23927021  | 0,0148  |
| ENSMUSG00000048922 | Cdca2         | -1,438230038 | 0,0148  |
| ENSMUSG00000021356 | Irf4          | -1,697129965 | 0,01481 |
| ENSMUSG00000032624 | Eml4          | 0,642350018  | 0,01482 |
| ENSMUSG00000043747 | 1520401A03Rik | -3,752219915 | 0,01483 |
| ENSMUSG00000038576 | Susd4         | 1,440410018  | 0,01483 |
| ENSMUSG00000036977 | Anapc10       | -0,718720019 | 0,01485 |
| ENSMUSG00000022109 | Med4          | -0,487029999 | 0,01488 |
| ENSMUSG00000070883 | Ccdc173       | -1,076779962 | 0,01489 |
| ENSMUSG00000023484 | Prph          | -1,644500017 | 0,0149  |
| ENSMUSG00000031154 | Otud5         | -0,375039995 | 0,01491 |
| ENSMUSG00000059810 | Rgs3          | 0,873220026  | 0,01493 |

|                    |           |              |         |
|--------------------|-----------|--------------|---------|
| ENSMUSG00000033880 | Lgals3bp  | 0,88282001   | 0,01495 |
| ENSMUSG00000037364 | Srrt      | -0,367879987 | 0,01496 |
| ENSMUSG00000035203 | Epn1      | 0,349110007  | 0,01497 |
| ENSMUSG00000041064 | Pif1      | -1,69749999  | 0,01499 |
| ENSMUSG00000052435 | Cebpe     | 1,382369995  | 0,01501 |
| ENSMUSG00000015647 | Lama5     | -1,429859996 | 0,01502 |
| ENSMUSG00000053368 | Rxfp2     | -4,845990181 | 0,01502 |
| ENSMUSG00000027244 | Atg13     | 0,700209975  | 0,01504 |
| ENSMUSG00000017550 | Atad5     | -1,515210032 | 0,01505 |
| ENSMUSG00000037406 | Htra4     | 2,467890024  | 0,01505 |
| ENSMUSG00000014599 | Csf1      | -0,671150029 | 0,01507 |
| ENSMUSG00000077711 | AF357399  | -1,501960039 | 0,01509 |
| ENSMUSG00000029016 | Clcn6     | -0,77779001  | 0,01511 |
| ENSMUSG00000022634 | Yaf2      | -0,489450008 | 0,01512 |
| ENSMUSG00000026864 | Hspa5     | 0,737829983  | 0,01512 |
| ENSMUSG00000001018 | Snapin    | -0,69332999  | 0,01513 |
| ENSMUSG00000029012 | Orc5      | 0,340799987  | 0,01516 |
| ENSMUSG00000022263 | Trio      | -1,161569953 | 0,01522 |
| ENSMUSG00000053178 | Mterf1b   | -1,041980028 | 0,01524 |
| ENSMUSG00000053647 | Gper1     | -3,749969959 | 0,01527 |
| ENSMUSG00000032436 | Cmtm7     | -1,16068995  | 0,01528 |
| ENSMUSG00000020077 | Srgn      | -1,156890035 | 0,01528 |
| ENSMUSG00000017176 | Nt5c3b    | -0,816590011 | 0,01528 |
| ENSMUSG00000059406 | Tmprss9   | -2,678060055 | 0,01531 |
| ENSMUSG00000039533 | Mmd2      | 1,801159978  | 0,01535 |
| ENSMUSG00000006517 | Mvd       | 0,889209986  | 0,0154  |
| ENSMUSG00000022799 | Arhgap31  | -1,015840054 | 0,01543 |
| ENSMUSG00000002010 | ldh3g     | 0,332040012  | 0,01544 |
| ENSMUSG00000046691 | Chtf8     | -0,366380006 | 0,01545 |
| ENSMUSG00000077222 | Gm22270   | -1,027369976 | 0,01547 |
| ENSMUSG00000070730 | Rmdn3     | 0,708389997  | 0,01551 |
| ENSMUSG00000017692 | Rhbdl3    | -1,734850049 | 0,01556 |
| ENSMUSG00000031398 | Plxna3    | -1,343039989 | 0,01561 |
| ENSMUSG00000059839 | Zfp874b   | 0,545679986  | 0,01562 |
| ENSMUSG00000030638 | Sh3gl3    | -7,922550201 | 0,01564 |
| ENSMUSG00000034110 | Kctd7     | 0,708410025  | 0,01565 |
| ENSMUSG00000044768 | D1Ert622e | 0,730719984  | 0,01567 |
| ENSMUSG00000007122 | Casq1     | -2,55298996  | 0,01568 |
| ENSMUSG00000004994 | Ccdc130   | -0,637910008 | 0,01569 |
| ENSMUSG00000050195 | Scd4      | -3,433700085 | 0,0157  |
| ENSMUSG00000029461 | Fam168a   | 0,833949983  | 0,01573 |
| ENSMUSG00000041264 | Uspl1     | -0,412510008 | 0,01573 |
| ENSMUSG00000026943 | Lcn12     | 3,550869942  | 0,01574 |
| ENSMUSG00000007594 | Hapln4    | 1,749160051  | 0,01578 |
| ENSMUSG00000044206 | Vsig4     | 1,127699971  | 0,01581 |
| ENSMUSG00000041757 | Plekha6   | 1,168769956  | 0,01583 |
| ENSMUSG00000040423 | Rc3h1     | -0,319350004 | 0,01584 |

|                    |          |              |         |
|--------------------|----------|--------------|---------|
| ENSMUSG00000035898 | Uba6     | -1,262820005 | 0,01587 |
| ENSMUSG00000039057 | Myo16    | -2,487440109 | 0,01594 |
| ENSMUSG00000027167 | Elp4     | 0,474119991  | 0,01594 |
| ENSMUSG00000040258 | Nxph4    | -4,016620159 | 0,01595 |
| ENSMUSG00000024012 | Mtch1    | -0,623049974 | 0,01597 |
| ENSMUSG00000039990 | Edrf1    | 0,514530003  | 0,01597 |
| ENSMUSG00000054021 | Sirt5    | 0,942120016  | 0,01597 |
| ENSMUSG00000075410 | Prcd     | -1,990560055 | 0,01598 |
| ENSMUSG00000023349 | Clec4n   | -1,165949941 | 0,01598 |
| ENSMUSG00000074793 | Hspa12b  | -0,888289988 | 0,01598 |
| ENSMUSG00000062585 | Cnr2     | 0,886110008  | 0,01599 |
| ENSMUSG00000043441 | Gpr149   | -10,75024033 | 0,016   |
| ENSMUSG00000054580 | Pla2r1   | -0,891569972 | 0,01603 |
| ENSMUSG00000037894 | H2afz    | -0,731949985 | 0,01603 |
| ENSMUSG00000030895 | Hpx      | 1,608860016  | 0,01606 |
| ENSMUSG00000031101 | Sash3    | -1,00959003  | 0,0161  |
| ENSMUSG00000033860 | Fgg      | 1,474449992  | 0,01615 |
| ENSMUSG00000021546 | Hnrnpk   | -0,225140005 | 0,01617 |
| ENSMUSG00000045498 | Pcdhb3   | -3,688940048 | 0,01618 |
| ENSMUSG00000044155 | Lsm8     | -1,053990006 | 0,01618 |
| ENSMUSG00000016984 | Etaa1    | -0,405250013 | 0,01618 |
| ENSMUSG00000012123 | Crybg2   | 1,785030007  | 0,01618 |
| ENSMUSG00000037824 | Tspan14  | -0,579580009 | 0,01619 |
| ENSMUSG00000090264 | Eif4ebp3 | 1,697100043  | 0,01619 |
| ENSMUSG00000078763 | Slfn1    | -1,383370042 | 0,0162  |
| ENSMUSG00000017754 | Pltp     | 1,196499944  | 0,0162  |
| ENSMUSG00000006315 | Tmem147  | 0,930040002  | 0,01621 |
| ENSMUSG00000052605 | Isoc2b   | 1,031450033  | 0,01625 |
| ENSMUSG00000028300 | C9orf72  | 0,631299973  | 0,01626 |
| ENSMUSG00000019647 | Sema6a   | -0,881200016 | 0,01627 |
| ENSMUSG00000034543 | Morc2a   | -0,811100006 | 0,0163  |
| ENSMUSG00000032042 | Srpr     | 0,708760023  | 0,01631 |
| ENSMUSG00000000058 | Cav2     | -0,968490005 | 0,01634 |
| ENSMUSG00000030770 | Parva    | -0,36390999  | 0,01634 |
| ENSMUSG00000034898 | Filip1   | -1,39515996  | 0,01637 |
| ENSMUSG00000049103 | Ccr2     | -1,328959942 | 0,01638 |
| ENSMUSG00000020115 | Tbk1     | 0,363240004  | 0,0164  |
| ENSMUSG00000019194 | Scn1b    | 1,00285995   | 0,01645 |
| ENSMUSG00000007036 | Abhd16a  | 0,455040008  | 0,01648 |
| ENSMUSG00000060212 | Pcnx2    | -2,506680012 | 0,0165  |
| ENSMUSG00000030465 | Psd3     | 1,080430031  | 0,01656 |
| ENSMUSG00000043535 | Setx     | -0,581629992 | 0,01657 |
| ENSMUSG00000057234 | Mettl15  | 0,716530025  | 0,01657 |
| ENSMUSG00000051184 | Zfp524   | 1,001719952  | 0,01657 |
| ENSMUSG00000032171 | Pin1     | -0,469980001 | 0,01659 |
| ENSMUSG00000018415 | Gid4     | 0,358960003  | 0,0166  |
| ENSMUSG00000051515 | Fam181b  | -3,032710075 | 0,01662 |

|                    |               |              |         |
|--------------------|---------------|--------------|---------|
| ENSMUSG00000020265 | Sumo3         | 0,307749987  | 0,01662 |
| ENSMUSG00000052456 | Asna1         | -0,492190003 | 0,01663 |
| ENSMUSG00000057378 | Ryr3          | -3,721159935 | 0,01664 |
| ENSMUSG00000050174 | Nudt6         | 0,631110013  | 0,01664 |
| ENSMUSG00000043909 | Trp53bp1      | -1,226969957 | 0,01665 |
| ENSMUSG00000048154 | Kmt2d         | -0,97766     | 0,01665 |
| ENSMUSG00000063015 | Ccni          | -0,435380012 | 0,01665 |
| ENSMUSG00000027876 | Reg4          | 3,825269938  | 0,01665 |
| ENSMUSG00000039670 | Oxid1         | 1,229210019  | 0,01666 |
| ENSMUSG00000060044 | Tmem26        | 1,227030039  | 0,01669 |
| ENSMUSG00000061751 | Kalrn         | 0,906579971  | 0,01669 |
| ENSMUSG00000028974 | Dffa          | 0,593850017  | 0,01673 |
| ENSMUSG00000015149 | Sirt2         | 0,383789986  | 0,01674 |
| ENSMUSG00000017428 | Psm11         | 0,37597999   | 0,01675 |
| ENSMUSG00000021374 | Nup153        | -0,627979994 | 0,01679 |
| ENSMUSG00000022602 | Arc           | -2,204900026 | 0,01681 |
| ENSMUSG00000038155 | Gstp2         | 1,92437005   | 0,01681 |
| ENSMUSG00000040843 | Tipr1         | -0,489549994 | 0,01685 |
| ENSMUSG00000010175 | Prox1         | 1,455189943  | 0,01691 |
| ENSMUSG00000045665 | Mfsd5         | -0,704940021 | 0,01692 |
| ENSMUSG00000056050 | Mia3          | 1,027670026  | 0,01693 |
| ENSMUSG00000018417 | Myo1b         | 0,555410028  | 0,017   |
| ENSMUSG00000035385 | Ccl2          | -1,517470002 | 0,01709 |
| ENSMUSG00000024050 | Wiz           | -0,836809993 | 0,01714 |
| ENSMUSG00000034928 | Rnf44         | -0,508679986 | 0,01714 |
| ENSMUSG00000017929 | B4galt5       | -0,67306     | 0,01715 |
| ENSMUSG00000094411 | Snord16a      | -3,324620008 | 0,01718 |
| ENSMUSG00000027423 | Snx5          | -0,484160006 | 0,01718 |
| ENSMUSG00000004707 | Ly9           | 1,266639948  | 0,01722 |
| ENSMUSG00000005150 | Wdr83         | 0,792970002  | 0,01726 |
| ENSMUSG00000040525 | Cblc          | 1,114300013  | 0,01729 |
| ENSMUSG00000029097 | Trmt44        | -0,595210016 | 0,01732 |
| ENSMUSG00000061947 | Serpina10     | 1,495110035  | 0,01732 |
| ENSMUSG00000029245 | Epha5         | -9,898659706 | 0,01734 |
| ENSMUSG00000052516 | Robo2         | -1,217929959 | 0,01736 |
| ENSMUSG00000053091 | Lins1         | -0,494219989 | 0,01737 |
| ENSMUSG00000036138 | Acaa1a        | 1,025930047  | 0,01737 |
| ENSMUSG00000024052 | Lpin2         | 0,894739985  | 0,01739 |
| ENSMUSG00000029804 | Herc3         | -0,938920021 | 0,01741 |
| ENSMUSG00000022533 | Atp13a3       | 0,65911001   | 0,01741 |
| ENSMUSG00000029436 | Mmp17         | -1,461670041 | 0,01742 |
| ENSMUSG00000021553 | Slc28a3       | -3,340759993 | 0,01744 |
| ENSMUSG00000003228 | Grk5          | -0,992709994 | 0,01745 |
| ENSMUSG00000035295 | Wdr38         | -1,916479945 | 0,01747 |
| ENSMUSG00000038884 | A230050P20Rik | 1,266080022  | 0,0175  |
| ENSMUSG00000022322 | Shcbp1        | -1,375030041 | 0,01753 |
| ENSMUSG00000031532 | Saraf         | 0,550149977  | 0,01756 |

|                    |               |              |         |
|--------------------|---------------|--------------|---------|
| ENSMUSG00000054702 | Ap1s3         | -1,286190033 | 0,01759 |
| ENSMUSG00000031667 | Aktip         | -0,525020003 | 0,01761 |
| ENSMUSG00000059183 | Mtfmt         | -0,308380008 | 0,01761 |
| ENSMUSG00000040658 | Dnph1         | 1,181959987  | 0,01762 |
| ENSMUSG00000055401 | Fbxo6         | 0,530939996  | 0,01763 |
| ENSMUSG00000020474 | Polm          | -1,028560042 | 0,01764 |
| ENSMUSG00000028980 | H6pd          | 1,180729985  | 0,01765 |
| ENSMUSG00000022217 | Emc9          | 1,003509998  | 0,01769 |
| ENSMUSG00000036873 | 2410004B18Rik | -0,870280027 | 0,01769 |
| ENSMUSG00000006586 | Runx1t1       | -2,385879993 | 0,01775 |
| ENSMUSG00000031197 | Vbp1          | -0,561380029 | 0,01777 |
| ENSMUSG00000006241 | Ccdc159       | 0,650279999  | 0,01783 |
| ENSMUSG00000040940 | Arhgef1       | -0,298909992 | 0,01784 |
| ENSMUSG00000028132 | Tmem56        | 1,520679951  | 0,01785 |
| ENSMUSG00000010517 | Faf1          | 0,497480005  | 0,01786 |
| ENSMUSG00000028976 | Slc2a5        | 1,505319953  | 0,01786 |
| ENSMUSG00000038122 | Tbc1d32       | 0,775409997  | 0,01789 |
| ENSMUSG00000007570 | Fance         | -0,559859991 | 0,0179  |
| ENSMUSG00000020131 | Pcsk4         | 1,132969975  | 0,01791 |
| ENSMUSG00000039183 | Nubp2         | 0,478249997  | 0,01793 |
| ENSMUSG00000031712 | Ii15          | 1,087200046  | 0,01793 |
| ENSMUSG00000047260 | Emc6          | 0,864849985  | 0,018   |
| ENSMUSG00000053914 | Kdm4d         | -3,65395999  | 0,01802 |
| ENSMUSG00000037896 | Rcor1         | -0,728380024 | 0,01805 |
| ENSMUSG00000046410 | Kcnk6         | -0,836880028 | 0,01807 |
| ENSMUSG00000070565 | Rasal2        | -0,735819995 | 0,01811 |
| ENSMUSG00000038390 | Gpr162        | -1,191740036 | 0,01817 |
| ENSMUSG00000003531 | Dgcr6         | 0,983749986  | 0,01818 |
| ENSMUSG00000029821 | Gsdme         | 0,924359977  | 0,01819 |
| ENSMUSG00000023336 | Wfdc1         | 1,067280054  | 0,01823 |
| ENSMUSG00000040297 | Suco          | -0,706110001 | 0,01827 |
| ENSMUSG00000027710 | Acad9         | 0,358110011  | 0,01828 |
| ENSMUSG00000008167 | Fbxw9         | 0,976979971  | 0,01829 |
| ENSMUSG00000035765 | Dym           | 0,35078001   | 0,01832 |
| ENSMUSG00000025867 | Cplx2         | -0,903490007 | 0,01834 |
| ENSMUSG00000003949 | Hlf           | 1,516010046  | 0,01836 |
| ENSMUSG00000031351 | Zfp185        | -2,123080015 | 0,01837 |
| ENSMUSG00000022313 | Utp23         | -0,526329994 | 0,01837 |
| ENSMUSG00000001827 | Folr1         | -2,342210054 | 0,01843 |
| ENSMUSG00000022194 | Pabpn1        | -0,703530014 | 0,01845 |
| ENSMUSG00000030545 | Pex11a        | 0,994069993  | 0,01846 |
| ENSMUSG00000030019 | Fbxl14        | -0,442790002 | 0,01849 |
| ENSMUSG00000016494 | Cd34          | -0,984130025 | 0,0185  |
| ENSMUSG00000044576 | Garem2        | -5,925849915 | 0,01853 |
| ENSMUSG00000019718 | L3hypdh       | 0,685469985  | 0,01856 |
| ENSMUSG00000037979 | Ccdc92        | -1,828310013 | 0,01858 |
| ENSMUSG00000030867 | Plk1          | -1,201979995 | 0,0186  |



|                    |          |              |         |
|--------------------|----------|--------------|---------|
| ENSMUSG00000044201 | Cdc25c   | -1,713469982 | 0,01863 |
| ENSMUSG00000029875 | Ccdc184  | -3,811180115 | 0,01864 |
| ENSMUSG00000065041 | Gm24044  | -1,442219973 | 0,01865 |
| ENSMUSG00000031985 | Gnpat    | 0,319359988  | 0,01866 |
| ENSMUSG00000021838 | Samd4    | -0,722609997 | 0,0187  |
| ENSMUSG00000040329 | Il7      | -1,642689943 | 0,01871 |
| ENSMUSG00000012126 | Ubxn11   | -1,381379962 | 0,01872 |
| ENSMUSG00000042015 | Wdr41    | 0,298090011  | 0,01877 |
| ENSMUSG00000091055 | Siglec15 | -9,67031002  | 0,01878 |
| ENSMUSG00000021578 | Ccdc127  | -0,361000001 | 0,01878 |
| ENSMUSG00000025780 | Itih5    | 1,538079977  | 0,01878 |
| ENSMUSG00000054400 | Cklf     | -1,245100021 | 0,0188  |
| ENSMUSG00000028212 | Ccne2    | -1,138090014 | 0,0188  |
| ENSMUSG00000006538 | Ihh      | 1,252570033  | 0,01881 |
| ENSMUSG00000026616 | Cr2      | 1,744390011  | 0,01882 |
| ENSMUSG00000074088 | Snrnp40  | -0,576300025 | 0,01883 |
| ENSMUSG00000061024 | Rrs1     | -0,687600017 | 0,01885 |
| ENSMUSG00000059995 | Atxn7l3  | -0,653410017 | 0,01887 |
| ENSMUSG00000032279 | Idh3a    | -0,587119997 | 0,01893 |
| ENSMUSG00000034066 | Farp2    | 0,948450029  | 0,01893 |
| ENSMUSG00000018076 | Med13l   | -1,121389985 | 0,01897 |
| ENSMUSG00000070305 | Mpzl3    | 0,723540008  | 0,01897 |
| ENSMUSG00000023909 | Paqr4    | -0,94788003  | 0,01898 |
| ENSMUSG00000019842 | Traf3ip2 | -1,141170025 | 0,01898 |
| ENSMUSG00000041028 | Ghitm    | 0,53549999   | 0,01902 |
| ENSMUSG00000029198 | Grpel1   | 0,895780027  | 0,01905 |
| ENSMUSG00000000127 | Fer      | -0,736079991 | 0,01909 |
| ENSMUSG00000026361 | Cdc73    | -0,439539999 | 0,01909 |
| ENSMUSG00000092260 | Zfp963   | 0,725989997  | 0,01911 |
| ENSMUSG00000086158 | Ccpg1os  | 0,889599979  | 0,01911 |
| ENSMUSG00000025092 | Hspa12a  | 1,151200056  | 0,01911 |
| ENSMUSG00000039068 | Zzz3     | -0,603460014 | 0,01912 |
| ENSMUSG00000023460 | Rab12    | -0,505620003 | 0,01915 |
| ENSMUSG00000021835 | Bmp4     | 0,922150016  | 0,01915 |
| ENSMUSG00000045467 | Ttll13   | 1,336449981  | 0,01917 |
| ENSMUSG00000028278 | Rragd    | -1,203619957 | 0,01918 |
| ENSMUSG00000000538 | Tom1l2   | -0,427769989 | 0,01921 |
| ENSMUSG00000056258 | Kcnq3    | -5,311729908 | 0,01922 |
| ENSMUSG00000038244 | Mical2   | -1,534430027 | 0,01925 |
| ENSMUSG00000010025 | Aldh3a2  | 0,840650022  | 0,01925 |
| ENSMUSG00000059991 | Nptx2    | -5,436130047 | 0,01927 |
| ENSMUSG00000007946 | Phox2a   | -7,981649876 | 0,01936 |
| ENSMUSG00000058076 | Sdhc     | 0,820609987  | 0,01942 |
| ENSMUSG00000054690 | Emcn     | -1,090800047 | 0,01945 |
| ENSMUSG00000001229 | Dpp9     | 0,702620029  | 0,01947 |
| ENSMUSG00000000958 | Slc7a7   | 0,75357002   | 0,01947 |
| ENSMUSG00000025968 | Ndufs1   | 0,565609992  | 0,0195  |

|                    |               |              |         |
|--------------------|---------------|--------------|---------|
| ENSMUSG00000061079 | Zfp143        | -0,407079995 | 0,01951 |
| ENSMUSG00000048827 | Pkd1l3        | -1,314020038 | 0,01952 |
| ENSMUSG00000030247 | Kcnj8         | 1,072679996  | 0,01953 |
| ENSMUSG00000035798 | Zdhhc17       | -0,714280009 | 0,01956 |
| ENSMUSG00000028466 | Creb3         | 0,468809992  | 0,01956 |
| ENSMUSG00000024325 | Ring1         | 0,49188      | 0,01956 |
| ENSMUSG00000041268 | Dmxl2         | 0,706659973  | 0,01963 |
| ENSMUSG00000052794 | 1700030K09Rik | -0,756760001 | 0,01966 |
| ENSMUSG00000026927 | Entr1         | -0,442799985 | 0,01968 |
| ENSMUSG00000063810 | Alms1         | -1,447440028 | 0,0197  |
| ENSMUSG00000039620 | Trmt9b        | 1,155809999  | 0,01974 |
| ENSMUSG00000063698 | Sfxn4         | -1,558429956 | 0,01975 |
| ENSMUSG00000018750 | Zbtb4         | -0,620369971 | 0,01977 |
| ENSMUSG00000024339 | Tap2          | 1,064010024  | 0,01977 |
| ENSMUSG00000010205 | Raver1        | -0,672710001 | 0,01978 |
| ENSMUSG00000027463 | Slc52a3       | -1,341060042 | 0,0198  |
| ENSMUSG00000029452 | Tmem116       | -1,815969944 | 0,01981 |
| ENSMUSG00000029209 | Gnpda2        | -1,180349946 | 0,01982 |
| ENSMUSG00000034269 | Setd5         | -0,850220025 | 0,01982 |
| ENSMUSG00000060038 | Dhps          | -0,797720015 | 0,01984 |
| ENSMUSG00000000094 | Tbx4          | -4,209070206 | 0,01986 |
| ENSMUSG00000020866 | Cacna1g       | -2,373559952 | 0,01986 |
| ENSMUSG00000019235 | Rps6kl1       | 1,043159962  | 0,01986 |
| ENSMUSG00000028175 | Depdc1a       | -1,336750031 | 0,01987 |
| ENSMUSG00000021314 | Amph          | 2,781879902  | 0,01987 |
| ENSMUSG00000032038 | St3gal4       | 0,640600026  | 0,01993 |
| ENSMUSG00000019789 | Hey2          | -1,889000058 | 0,01994 |
| ENSMUSG00000040188 | Scamp2        | -0,432130009 | 0,01995 |
| ENSMUSG00000026270 | Capn10        | 0,632770002  | 0,02    |
| ENSMUSG00000071550 | Cfap44        | 2,411720037  | 0,02003 |
| ENSMUSG00000034842 | Art3          | 1,088099957  | 0,02006 |
| ENSMUSG00000005362 | Crbn          | 0,402060002  | 0,02007 |
| ENSMUSG00000031927 | 1700012B09Rik | -11,9945097  | 0,02013 |
| ENSMUSG00000040586 | Ofd1          | -0,61036998  | 0,02014 |
| ENSMUSG00000007837 | Prrg2         | 0,745299995  | 0,0202  |
| ENSMUSG00000027628 | Aar2          | 0,332320005  | 0,02022 |
| ENSMUSG00000021240 | Abcd4         | -0,646380007 | 0,02027 |
| ENSMUSG00000063049 | Ing2          | -0,856679976 | 0,02031 |
| ENSMUSG00000047613 | A430005L14Rik | 1,011719942  | 0,02032 |
| ENSMUSG00000026749 | Nek6          | 0,615980029  | 0,02033 |
| ENSMUSG00000080486 | Snord100      | -1,950440049 | 0,02035 |
| ENSMUSG00000020048 | Hsp90b1       | 0,621630013  | 0,02035 |
| ENSMUSG00000034855 | Cxcl10        | 1,340049982  | 0,02036 |
| ENSMUSG00000088929 | Gm24299       | -1,720729947 | 0,02038 |
| ENSMUSG00000053641 | Dennd4a       | 0,913810015  | 0,02039 |
| ENSMUSG00000033342 | Plppr5        | 2,42366004   | 0,02039 |
| ENSMUSG00000004789 | Dlst          | 0,288569987  | 0,02043 |

|                    |               |              |         |
|--------------------|---------------|--------------|---------|
| ENSMUSG00000033208 | S100b         | -2,815969944 | 0,02044 |
| ENSMUSG00000033762 | Recql4        | -1,337560058 | 0,02045 |
| ENSMUSG00000026197 | Zfand2b       | 0,934930027  | 0,02045 |
| ENSMUSG00000002908 | Kcnn1         | 0,750500023  | 0,02048 |
| ENSMUSG00000030720 | Cln3          | -0,454129994 | 0,02049 |
| ENSMUSG00000036036 | Zfp57         | -1,32167995  | 0,02051 |
| ENSMUSG00000064390 | Rnu73b        | -2,511420012 | 0,02055 |
| ENSMUSG00000056487 | Mettl7a2      | 2,734479904  | 0,02056 |
| ENSMUSG00000031095 | Cul4b         | -0,334850013 | 0,02057 |
| ENSMUSG00000073598 | 1700066B19Rik | -2,04144001  | 0,02059 |
| ENSMUSG00000035356 | Nfkbiz        | -0,818880022 | 0,02062 |
| ENSMUSG00000044881 | Coa4          | 0,667150021  | 0,02062 |
| ENSMUSG00000028567 | Txndc12       | 0,679889977  | 0,02062 |
| ENSMUSG00000027326 | Kn11          | -1,769330025 | 0,02069 |
| ENSMUSG00000046994 | Mars2         | -0,813009977 | 0,02074 |
| ENSMUSG00000092212 | Slc22a13b-ps  | -1,564599991 | 0,02081 |
| ENSMUSG00000034488 | Edil3         | -9,623259544 | 0,02086 |
| ENSMUSG00000026227 | 2810459M11Rik | 1,376440048  | 0,02089 |
| ENSMUSG00000030094 | Xpc           | 0,396640003  | 0,02092 |
| ENSMUSG00000022012 | Enox1         | -6,198979855 | 0,02094 |
| ENSMUSG00000025812 | Pard3         | 0,624890029  | 0,02094 |
| ENSMUSG00000020840 | Blmh          | 0,717480004  | 0,02095 |
| ENSMUSG00000010307 | Tmem86a       | 0,949509978  | 0,02106 |
| ENSMUSG00000021749 | Oit1          | 2,352040052  | 0,02106 |
| ENSMUSG00000041308 | Sntb2         | -1,190569997 | 0,02109 |
| ENSMUSG00000029201 | Ugdh          | 0,723240018  | 0,02111 |
| ENSMUSG00000022296 | Baalc         | -6,859049797 | 0,02113 |
| ENSMUSG00000029265 | Dr1           | -0,263509989 | 0,02113 |
| ENSMUSG00000070390 | Nlrp1b        | -1,461689949 | 0,02114 |
| ENSMUSG00000027171 | Prrg4         | -2,448029995 | 0,02118 |
| ENSMUSG00000031521 | Aga           | 0,607949972  | 0,02121 |
| ENSMUSG00000015093 | Clic3         | 1,841259956  | 0,02123 |
| ENSMUSG00000061535 | C1qtnf7       | -1,47755003  | 0,02128 |
| ENSMUSG00000026773 | Pfkfb3        | -1,223180056 | 0,0213  |
| ENSMUSG00000071516 | Hist1h2ai     | -2,64861989  | 0,02135 |
| ENSMUSG00000021720 | Rnf180        | -1,687039971 | 0,02135 |
| ENSMUSG00000029814 | Igf2bp3       | -2,783159971 | 0,02136 |
| ENSMUSG00000068114 | Ccdc134       | -0,612119973 | 0,02139 |
| ENSMUSG00000040464 | Gtpbp10       | 0,261810005  | 0,02141 |
| ENSMUSG00000048967 | Yjefn3        | -1,393409967 | 0,02143 |
| ENSMUSG00000050132 | Sarm1         | -1,563500047 | 0,02148 |
| ENSMUSG00000032333 | Stoml1        | -0,775659978 | 0,02148 |
| ENSMUSG00000041809 | Efhc1         | -1,561740041 | 0,0215  |
| ENSMUSG00000033386 | Frrs1         | -0,443729997 | 0,0215  |
| ENSMUSG00000051439 | Cd14          | -1,322299957 | 0,02151 |
| ENSMUSG00000070284 | Gmppb         | 0,689530015  | 0,02151 |
| ENSMUSG00000034382 | AI661453      | 1,050989985  | 0,02151 |

|                    |               |              |         |
|--------------------|---------------|--------------|---------|
| ENSMUSG00000059811 | Atl2          | 0,720109999  | 0,02154 |
| ENSMUSG00000045962 | Wnk1          | -0,661090016 | 0,02155 |
| ENSMUSG00000029426 | Scarb2        | 0,677380025  | 0,02155 |
| ENSMUSG00000055150 | Zfp78         | 1,079560041  | 0,02156 |
| ENSMUSG00000033111 | 3830406C13Rik | 0,516390026  | 0,02157 |
| ENSMUSG00000032194 | Kank2         | 0,556020021  | 0,02168 |
| ENSMUSG00000024074 | Crim1         | -0,445439994 | 0,02169 |
| ENSMUSG00000020787 | P2rx1         | -2,178859949 | 0,0217  |
| ENSMUSG00000071715 | Ncf4          | -0,885429978 | 0,0217  |
| ENSMUSG00000025877 | Hk3           | 0,659099996  | 0,02173 |
| ENSMUSG00000030930 | Chst15        | -0,602869987 | 0,02174 |
| ENSMUSG00000056091 | St3gal5       | 0,914929986  | 0,02174 |
| ENSMUSG00000017548 | Suz12         | -0,436549991 | 0,02175 |
| ENSMUSG00000032667 | Pon2          | 0,506150007  | 0,02175 |
| ENSMUSG00000028236 | Sdr16c5       | 3,656820059  | 0,02176 |
| ENSMUSG00000027475 | Kif3b         | -0,524290025 | 0,02179 |
| ENSMUSG00000062929 | Cfl2          | -0,401620001 | 0,02183 |
| ENSMUSG00000039747 | Orai2         | -0,935140014 | 0,02187 |
| ENSMUSG00000020549 | Elac2         | 0,363620013  | 0,02189 |
| ENSMUSG00000028975 | Pex14         | 0,46746999   | 0,02201 |
| ENSMUSG00000002812 | Flii          | -0,641520023 | 0,02203 |
| ENSMUSG00000039285 | Azi2          | 0,333279997  | 0,02204 |
| ENSMUSG00000079235 | Ccdc13        | -3,367150068 | 0,02205 |
| ENSMUSG00000034327 | Kctd9         | -0,469949991 | 0,02205 |
| ENSMUSG00000058709 | Egln2         | 0,781729996  | 0,02205 |
| ENSMUSG00000023087 | Noct          | -1,421569943 | 0,02206 |
| ENSMUSG00000006269 | Atp6v1b1      | -2,675349951 | 0,02207 |
| ENSMUSG00000020361 | Hspa4         | -0,298040003 | 0,02207 |
| ENSMUSG00000028238 | Atp6v0d2      | 1,133069992  | 0,02207 |
| ENSMUSG00000024487 | Yipf5         | 0,376960009  | 0,02212 |
| ENSMUSG00000010760 | Phlda2        | 1,199470043  | 0,02214 |
| ENSMUSG00000029490 | Mfsd7a        | 0,827759981  | 0,02214 |
| ENSMUSG00000034059 | Ypel4         | 1,108129978  | 0,02218 |
| ENSMUSG00000019984 | Med23         | -0,624660015 | 0,0222  |
| ENSMUSG00000030779 | Rbbp6         | -0,409480006 | 0,02221 |
| ENSMUSG00000046352 | Gjb2          | 1,352200031  | 0,02223 |
| ENSMUSG00000067149 | Jchain        | 1,443040013  | 0,02223 |
| ENSMUSG00000052212 | Cd177         | -2,519099951 | 0,02224 |
| ENSMUSG00000061143 | Mam13         | -0,965610027 | 0,02228 |
| ENSMUSG00000096225 | Lhx8          | -11,79518986 | 0,0223  |
| ENSMUSG00000051586 | Mical3        | -0,655369997 | 0,02236 |
| ENSMUSG00000059409 | Ppp2r5d       | -0,395480007 | 0,02236 |
| ENSMUSG00000032215 | Rsl24d1       | -0,706160009 | 0,02237 |
| ENSMUSG00000029370 | Rassf6        | 0,733640015  | 0,02244 |
| ENSMUSG00000016552 | Foxred2       | -1,383290052 | 0,02246 |
| ENSMUSG00000055745 | Rtl6          | -1,510319948 | 0,02249 |
| ENSMUSG00000077575 | Gm24888       | -1,524309993 | 0,02251 |

|                    |               |              |         |
|--------------------|---------------|--------------|---------|
| ENSMUSG00000036197 | Gxylt1        | -0,469940007 | 0,02251 |
| ENSMUSG00000032549 | Rab6b         | -1,058009982 | 0,02254 |
| ENSMUSG00000013766 | Ly6g6e        | 1,844370008  | 0,02254 |
| ENSMUSG00000041548 | Hspb8         | 0,800109982  | 0,02256 |
| ENSMUSG00000020696 | Rffl          | 0,981679976  | 0,02259 |
| ENSMUSG00000019577 | Pdk4          | -1,203979969 | 0,0226  |
| ENSMUSG00000045671 | Spred2        | -0,985920012 | 0,0226  |
| ENSMUSG00000038046 | Mrm3          | 0,70043999   | 0,02261 |
| ENSMUSG00000025138 | Sirt7         | 0,380510002  | 0,02262 |
| ENSMUSG00000061601 | Pclo          | 1,342990041  | 0,02263 |
| ENSMUSG00000034032 | Rpap1         | -0,581669986 | 0,02265 |
| ENSMUSG00000032594 | Ip6k1         | 0,232580006  | 0,02267 |
| ENSMUSG00000006717 | Acot13        | 0,801419973  | 0,0227  |
| ENSMUSG00000051855 | Mest          | -1,336740017 | 0,02273 |
| ENSMUSG00000042251 | Pm20d1        | 1,441990018  | 0,02274 |
| ENSMUSG00000040771 | Oard1         | 0,844299972  | 0,02276 |
| ENSMUSG00000006675 | P4htm         | -1,459100008 | 0,02278 |
| ENSMUSG00000089417 | Gm22009       | -1,928660035 | 0,0228  |
| ENSMUSG00000026799 | Med27         | -0,380650014 | 0,0228  |
| ENSMUSG00000029408 | Abcb9         | -0,738820016 | 0,02284 |
| ENSMUSG00000030870 | Ubfd1         | 0,456589997  | 0,02284 |
| ENSMUSG00000006932 | Ctnnb1        | -0,542580009 | 0,02285 |
| ENSMUSG00000063687 | Pcdhb5        | -2,328870058 | 0,02286 |
| ENSMUSG00000025466 | Fuom          | 1,454169989  | 0,02286 |
| ENSMUSG00000039741 | Bahcc1        | -1,20559001  | 0,0229  |
| ENSMUSG00000038065 | Mturn         | -1,09078002  | 0,02294 |
| ENSMUSG00000078622 | Ccdc47        | 0,424380004  | 0,02297 |
| ENSMUSG00000022750 | Klhl22        | -0,411430001 | 0,02305 |
| ENSMUSG00000014776 | Nol3          | -0,983889997 | 0,02307 |
| ENSMUSG00000032735 | Ablim3        | 0,922599971  | 0,02315 |
| ENSMUSG00000039478 | Micu3         | -0,710640013 | 0,02317 |
| ENSMUSG00000019802 | Sec63         | 0,489419997  | 0,02318 |
| ENSMUSG00000040560 | Wdr7          | 0,589820027  | 0,02318 |
| ENSMUSG00000038705 | Gmeb2         | -0,526449978 | 0,02323 |
| ENSMUSG00000063052 | Lrrc40        | -0,376419991 | 0,02323 |
| ENSMUSG00000031847 | 1700030J22Rik | -1,387689948 | 0,02325 |
| ENSMUSG00000031434 | Morc4         | -0,768760026 | 0,0233  |
| ENSMUSG00000005204 | Senp3         | -0,511799991 | 0,02331 |
| ENSMUSG00000048478 | Spata33       | -1,716539979 | 0,02336 |
| ENSMUSG00000062761 | Zfp512        | -0,510800004 | 0,02336 |
| ENSMUSG00000026576 | Atp1b1        | 1,358150005  | 0,02336 |
| ENSMUSG00000032238 | Rora          | 1,097219944  | 0,02338 |
| ENSMUSG00000020894 | Vamp2         | -0,655589998 | 0,02344 |
| ENSMUSG00000028037 | Ifi44         | 1,321609974  | 0,02346 |
| ENSMUSG00000039660 | Spout1        | -0,556089997 | 0,02351 |
| ENSMUSG00000063320 | 1190007I07Rik | 1,064589977  | 0,02352 |
| ENSMUSG00000032459 | Mrps22        | 0,497110009  | 0,02363 |

|                    |            |              |         |
|--------------------|------------|--------------|---------|
| ENSMUSG00000070639 | Lrrc8b     | -2,9582901   | 0,02364 |
| ENSMUSG00000023143 | Nagpa      | 0,433970004  | 0,02367 |
| ENSMUSG00000022010 | Tsc22d1    | -0,827520013 | 0,0237  |
| ENSMUSG00000074591 | Ankub1     | 1,90395999   | 0,02375 |
| ENSMUSG00000021175 | Cdca7l     | -1,366880059 | 0,02382 |
| ENSMUSG00000031629 | Cenpu      | -1,30903995  | 0,02382 |
| ENSMUSG00000022211 | Carmil3    | -2,089960098 | 0,02384 |
| ENSMUSG00000030652 | Coq7       | 0,953639984  | 0,02389 |
| ENSMUSG00000096215 | Smim22     | 1,607750058  | 0,02389 |
| ENSMUSG00000055761 | Nkain3     | -6,15955019  | 0,02393 |
| ENSMUSG00000042284 | Itga1      | 0,861240029  | 0,02393 |
| ENSMUSG00000033751 | Gadd45gip1 | 0,859179974  | 0,02399 |
| ENSMUSG00000041845 | Rhod       | 0,790740013  | 0,024   |
| ENSMUSG00000095687 | Rnaset2a   | 1,189450026  | 0,02406 |
| ENSMUSG00000032473 | Cldn18     | -2,283669949 | 0,02409 |
| ENSMUSG00000062997 | Rpl35      | -0,793540001 | 0,02412 |
| ENSMUSG00000028882 | Ppp1r8     | -0,484930009 | 0,02415 |
| ENSMUSG00000038916 | Soga3      | -2,036420107 | 0,02416 |
| ENSMUSG00000023033 | Scn8a      | 1,268479943  | 0,02416 |
| ENSMUSG00000051671 | Coa6       | 1,057260036  | 0,02417 |
| ENSMUSG00000020062 | Slc5a8     | -3,086329937 | 0,02421 |
| ENSMUSG00000038331 | Satb2      | -1,393460035 | 0,02422 |
| ENSMUSG00000015837 | Sqstm1     | 0,430860013  | 0,02422 |
| ENSMUSG00000040675 | Mthfd1l    | -1,06219995  | 0,02423 |
| ENSMUSG00000038742 | Angptl6    | 1,065639973  | 0,02423 |
| ENSMUSG00000049929 | Lpar4      | -1,801929951 | 0,02424 |
| ENSMUSG00000029433 | Diablo     | 0,423070014  | 0,02424 |
| ENSMUSG00000064125 | Prr36      | -0,692770004 | 0,02425 |
| ENSMUSG00000030850 | Ate1       | 0,670899987  | 0,02426 |
| ENSMUSG00000042185 | Nfrkb      | -0,561489999 | 0,02429 |
| ENSMUSG00000035413 | Tmem98     | -0,786310017 | 0,02435 |
| ENSMUSG00000043964 | Orai3      | 0,45965001   | 0,02435 |
| ENSMUSG00000030956 | Fam53b     | 0,696829975  | 0,02435 |
| ENSMUSG00000053931 | Cnn3       | -0,476029992 | 0,02438 |
| ENSMUSG00000060657 | Marf1      | 0,485720009  | 0,02443 |
| ENSMUSG00000038482 | Tfdp1      | -0,816340029 | 0,02452 |
| ENSMUSG00000051978 | Erich1     | -0,549310029 | 0,02456 |
| ENSMUSG00000041566 | Tssk1      | -2,839289904 | 0,02457 |
| ENSMUSG00000023826 | Prkn       | 2,293989897  | 0,02461 |
| ENSMUSG00000070644 | Etnk2      | 1,385589957  | 0,02462 |
| ENSMUSG00000002057 | Foxn1      | -3,729370117 | 0,02466 |
| ENSMUSG00000022350 | Washc5     | -0,555209994 | 0,02469 |
| ENSMUSG00000064115 | Cadm2      | -6,819900036 | 0,02471 |
| ENSMUSG00000071645 | Tut1       | -0,392820001 | 0,02474 |
| ENSMUSG00000028001 | Fga        | 1,371739984  | 0,02474 |
| ENSMUSG00000050043 | Tmx2       | 0,344680011  | 0,02476 |
| ENSMUSG00000037440 | Vnn1       | 1,451820016  | 0,0248  |

|                    |          |              |         |
|--------------------|----------|--------------|---------|
| ENSMUSG00000030282 | Cmas     | 0,498730004  | 0,02482 |
| ENSMUSG00000030869 | Ndufab1  | 0,945010006  | 0,02483 |
| ENSMUSG00000028414 | Fktn     | 0,769089997  | 0,02485 |
| ENSMUSG00000034781 | Gna11    | 0,586799979  | 0,02486 |
| ENSMUSG00000030880 | Polr3e   | -0,305750012 | 0,02486 |
| ENSMUSG00000048281 | Dleu7    | 3,794260025  | 0,02497 |
| ENSMUSG00000037443 | Cep85    | 0,963980019  | 0,02499 |
| ENSMUSG00000037070 | Rbmxl1   | -0,679929972 | 0,025   |
| ENSMUSG00000063594 | Gng8     | -4,003240108 | 0,02502 |
| ENSMUSG00000023232 | Serinc2  | -0,891420007 | 0,02507 |
| ENSMUSG00000030325 | Klrb1c   | -1,756080031 | 0,02508 |
| ENSMUSG00000035941 | Ibtk     | 0,506070018  | 0,02509 |
| ENSMUSG00000030905 | Crym     | 1,303349972  | 0,02512 |
| ENSMUSG00000077565 | Gm23201  | -1,971699953 | 0,02516 |
| ENSMUSG00000031820 | Babam1   | 0,559620023  | 0,02516 |
| ENSMUSG00000028243 | Ubxn2b   | 0,542620003  | 0,02519 |
| ENSMUSG00000031669 | Gins3    | -0,857039988 | 0,0252  |
| ENSMUSG00000030657 | Xylt1    | -4,458650112 | 0,02521 |
| ENSMUSG00000027347 | Rasgrp1  | -0,935389996 | 0,02523 |
| ENSMUSG00000040441 | Slc26a10 | 1,132279992  | 0,02523 |
| ENSMUSG00000025147 | Mob2     | 0,66249001   | 0,02528 |
| ENSMUSG00000024360 | Etf1     | -0,309460014 | 0,02534 |
| ENSMUSG00000039745 | Htatip2  | 0,893939972  | 0,02535 |
| ENSMUSG00000024164 | C3       | 1,233209968  | 0,02537 |
| ENSMUSG00000022824 | Muc13    | -3,335589886 | 0,02539 |
| ENSMUSG00000018196 | Glrx2    | 0,568189979  | 0,02541 |
| ENSMUSG00000022898 | Vps26c   | 0,425940007  | 0,02542 |
| ENSMUSG00000053646 | Plxnb1   | 1,001790047  | 0,02545 |
| ENSMUSG00000038957 | Edc3     | -0,441060007 | 0,02549 |
| ENSMUSG00000004018 | Fancl    | 0,73763001   | 0,02549 |
| ENSMUSG00000043384 | Gprasp1  | -0,620859981 | 0,02551 |
| ENSMUSG00000038028 | Tigar    | 0,359030008  | 0,02551 |
| ENSMUSG00000090019 | Gimap1   | 0,945219994  | 0,02551 |
| ENSMUSG00000037321 | Tap1     | 0,974020004  | 0,02556 |
| ENSMUSG00000028240 | Cyp7a1   | 1,628409982  | 0,02556 |
| ENSMUSG00000037890 | Wdr19    | -0,901139975 | 0,02557 |
| ENSMUSG00000004934 | Pias4    | -0,527750015 | 0,02557 |
| ENSMUSG00000029415 | Sdad1    | -0,569310009 | 0,02558 |
| ENSMUSG00000039050 | Osbpl2   | 0,457859993  | 0,02559 |
| ENSMUSG00000034825 | Nrip3    | -2,36383009  | 0,02561 |
| ENSMUSG00000049300 | Prmt6    | -0,378149986 | 0,02562 |
| ENSMUSG00000052336 | Cx3cr1   | -1,014189959 | 0,02563 |
| ENSMUSG00000059326 | Csf2ra   | -0,784940004 | 0,02564 |
| ENSMUSG00000089809 | Rasgef1b | 2,517740011  | 0,02573 |
| ENSMUSG00000055723 | Rras2    | -0,662150025 | 0,02577 |
| ENSMUSG00000015290 | Ubl4a    | 0,416449994  | 0,0258  |
| ENSMUSG00000006724 | Cyp27b1  | -4,497029781 | 0,02581 |



|                     |               |              |         |
|---------------------|---------------|--------------|---------|
| ENSMUSG00000006526  | Tmem110       | 0,523649991  | 0,02586 |
| ENSMUSG000000037705 | Tecta         | -3,699150085 | 0,02588 |
| ENSMUSG000000051397 | Tacstd2       | -2,164069891 | 0,02591 |
| ENSMUSG000000036411 | 9530077C05Rik | -1,898480058 | 0,02593 |
| ENSMUSG000000020088 | Sar1a         | -0,336210012 | 0,02593 |
| ENSMUSG000000042628 | Zfyve1        | 0,686999977  | 0,02594 |
| ENSMUSG000000033565 | Rbfox2        | -0,767560005 | 0,02596 |
| ENSMUSG000000029557 | Mrm2          | 0,842949986  | 0,02598 |
| ENSMUSG000000051853 | Arf3          | -0,451719999 | 0,02599 |
| ENSMUSG000000022575 | Gsdmd         | 0,628440022  | 0,02601 |
| ENSMUSG000000057137 | Tmem140       | 0,914160013  | 0,02605 |
| ENSMUSG000000050732 | Vamp8         | 1,100379944  | 0,02611 |
| ENSMUSG000000022422 | Dsccl1        | -1,936490059 | 0,02613 |
| ENSMUSG000000066595 | Flvcr1        | -0,702700019 | 0,02614 |
| ENSMUSG000000020389 | Cdkl3         | -1,136279941 | 0,02618 |
| ENSMUSG000000031993 | Snx19         | 0,603810012  | 0,02629 |
| ENSMUSG000000019143 | Hars2         | 0,222299993  | 0,02634 |
| ENSMUSG000000041974 | Spidr         | -0,566680014 | 0,02635 |
| ENSMUSG000000044348 | Slc25a53      | -0,512340009 | 0,0264  |
| ENSMUSG000000053483 | Usp21         | -0,379429996 | 0,0264  |
| ENSMUSG000000033697 | Arhgap39      | -0,583840013 | 0,02641 |
| ENSMUSG000000077440 | Gm23130       | -1,451509953 | 0,02643 |
| ENSMUSG000000004266 | Ptpn6         | 0,50116998   | 0,02643 |
| ENSMUSG000000025876 | Unc5a         | -1,054909945 | 0,02644 |
| ENSMUSG000000028013 | Ppa2          | 0,897300005  | 0,02645 |
| ENSMUSG000000025050 | Pcgf6         | 0,394430012  | 0,02647 |
| ENSMUSG000000013629 | Cad           | -1,015110016 | 0,02654 |
| ENSMUSG000000030269 | Mtmr14        | 0,302839994  | 0,02656 |
| ENSMUSG000000015165 | Hnrnp1        | -0,373299986 | 0,0266  |
| ENSMUSG000000029401 | Rilpl2        | -0,769439995 | 0,02665 |
| ENSMUSG000000029177 | Cenpa         | -0,953909993 | 0,02672 |
| ENSMUSG000000028068 | Iqgap3        | -1,378309965 | 0,02672 |
| ENSMUSG000000030443 | Zfp583        | -2,156490088 | 0,02674 |
| ENSMUSG000000030168 | Adipor2       | 1,015650034  | 0,02674 |
| ENSMUSG000000031654 | Cbln1         | -11,43340015 | 0,02675 |
| ENSMUSG000000026632 | Tatdn3        | 0,550759971  | 0,02683 |
| ENSMUSG000000036196 | Slc26a8       | -3,729419947 | 0,02684 |
| ENSMUSG000000056131 | Pgm3          | 0,795469999  | 0,02685 |
| ENSMUSG000000092887 | Snord53       | -2,616319895 | 0,02686 |
| ENSMUSG000000049985 | Ankrd55       | -1,403409958 | 0,02687 |
| ENSMUSG000000021070 | Bdkrb2        | -4,381810188 | 0,02688 |
| ENSMUSG000000040591 | 1110051M20Rik | -0,926129997 | 0,02694 |
| ENSMUSG000000026104 | Stat1         | 1,01462996   | 0,02699 |
| ENSMUSG000000043140 | Tmem186       | 0,633729994  | 0,02701 |
| ENSMUSG000000064647 | Gm23301       | -1,240640044 | 0,02702 |
| ENSMUSG000000022125 | Cln5          | 0,374819994  | 0,02716 |
| ENSMUSG000000030714 | Sgf29         | 0,707059979  | 0,02716 |

|                    |               |              |         |
|--------------------|---------------|--------------|---------|
| ENSMUSG00000019943 | Atp2b1        | -0,572560012 | 0,02718 |
| ENSMUSG00000032040 | Dcps          | 0,400649995  | 0,0272  |
| ENSMUSG00000015599 | Ttbk1         | 1,881940007  | 0,02726 |
| ENSMUSG00000020429 | Igfbp1        | 1,594079971  | 0,02727 |
| ENSMUSG00000026810 | Dpm2          | -0,384200007 | 0,02728 |
| ENSMUSG00000048755 | Mcat          | 0,648230016  | 0,0273  |
| ENSMUSG00000025857 | Dnaaf5        | -0,610279977 | 0,02732 |
| ENSMUSG00000035365 | Parpbp        | -1,739959955 | 0,02736 |
| ENSMUSG00000007591 | Tssk4         | -1,888260007 | 0,02737 |
| ENSMUSG00000037544 | Dlgap5        | -1,79203999  | 0,02739 |
| ENSMUSG00000052833 | Sae1          | -0,486820012 | 0,0274  |
| ENSMUSG00000095595 | Fam177a       | -2,141030073 | 0,02747 |
| ENSMUSG00000038079 | Tmem237       | -0,822109997 | 0,02752 |
| ENSMUSG00000033904 | Ccp110        | -0,775990009 | 0,02753 |
| ENSMUSG00000026686 | Lmx1a         | -3,151959896 | 0,02757 |
| ENSMUSG00000058672 | Tubb2a        | 1,21826005   | 0,02761 |
| ENSMUSG00000026219 | Trip12        | -0,668470025 | 0,02763 |
| ENSMUSG00000025793 | Hgs           | -0,221190006 | 0,02763 |
| ENSMUSG00000021671 | Poc5          | -0,503830016 | 0,02766 |
| ENSMUSG00000037331 | Larp1         | 0,513149977  | 0,0277  |
| ENSMUSG00000025422 | Agap2         | 0,938350022  | 0,0277  |
| ENSMUSG00000051242 | Pcdhb9        | -1,584900022 | 0,02773 |
| ENSMUSG00000024190 | Dusp1         | -0,916949987 | 0,02786 |
| ENSMUSG00000054469 | Lclat1        | 0,557099998  | 0,02787 |
| ENSMUSG00000020677 | Ddx52         | -0,491059989 | 0,02798 |
| ENSMUSG00000040726 | Hesx1         | -4,100220203 | 0,02803 |
| ENSMUSG00000020821 | Kif1c         | 0,472600013  | 0,02805 |
| ENSMUSG00000030030 | 1700003E16Rik | 0,894050002  | 0,02805 |
| ENSMUSG00000040785 | Ttc3          | -0,805100024 | 0,02807 |
| ENSMUSG00000028071 | Sh2d2a        | 1,418560028  | 0,02809 |
| ENSMUSG00000022651 | Retnlg        | -2,593800068 | 0,0281  |
| ENSMUSG00000046442 | Ppm1e         | -2,139260054 | 0,02815 |
| ENSMUSG00000043501 | Lgals2        | -1,747869968 | 0,02816 |
| ENSMUSG00000034021 | Pds5b         | -0,534169972 | 0,02819 |
| ENSMUSG00000042155 | Klhl23        | -0,90377003  | 0,0282  |
| ENSMUSG00000042446 | Zmym4         | -0,616959989 | 0,0282  |
| ENSMUSG00000039735 | Fnbp1l        | -0,897580028 | 0,02823 |
| ENSMUSG00000046010 | Zfp830        | -0,301230013 | 0,02823 |
| ENSMUSG00000016624 | Phf21b        | -1,21705997  | 0,02824 |
| ENSMUSG00000029394 | Cdk2ap1       | -0,679920018 | 0,02824 |
| ENSMUSG00000096001 | 2610528A11Rik | -2,736049891 | 0,02826 |
| ENSMUSG00000038379 | Ttk           | -1,534890056 | 0,0283  |
| ENSMUSG00000028410 | Dnaja1        | 0,54697001   | 0,02832 |
| ENSMUSG00000035206 | Sppl2b        | -0,479719996 | 0,02836 |
| ENSMUSG00000015312 | Gadd45b       | -1,159610033 | 0,0284  |
| ENSMUSG00000052369 | Tmem106c      | 0,539969981  | 0,02841 |
| ENSMUSG00000047844 | Bex4          | 1,757740021  | 0,02841 |

|                    |            |              |         |
|--------------------|------------|--------------|---------|
| ENSMUSG00000018433 | Nol11      | -0,502470016 | 0,02842 |
| ENSMUSG00000019763 | Rmnd1      | 0,413309991  | 0,02842 |
| ENSMUSG00000035121 | Neil2      | -1,163699985 | 0,02843 |
| ENSMUSG00000078521 | Aunip      | -2,04211998  | 0,02854 |
| ENSMUSG00000020930 | Ccdc103    | -1,459740043 | 0,02855 |
| ENSMUSG00000027335 | Adra1d     | -4,52699995  | 0,02856 |
| ENSMUSG00000024570 | Rbfa       | 0,752349973  | 0,02859 |
| ENSMUSG00000061536 | Sec22c     | 0,502759993  | 0,02863 |
| ENSMUSG00000002028 | Kmt2a      | -0,929120004 | 0,02877 |
| ENSMUSG00000038402 | Foxf2      | -11,28512001 | 0,02879 |
| ENSMUSG00000038535 | Zfp280d    | -0,495649993 | 0,02879 |
| ENSMUSG00000018347 | Zkscan6    | -0,520439982 | 0,02889 |
| ENSMUSG00000052609 | Plekhg3    | -0,596310019 | 0,02893 |
| ENSMUSG00000025894 | Aasdhpt    | 0,582970023  | 0,02895 |
| ENSMUSG00000056978 | Hamp2      | 1,777099967  | 0,02897 |
| ENSMUSG00000001687 | Ubl3       | 0,414840013  | 0,02898 |
| ENSMUSG00000030357 | Fkbp4      | 0,57397002   | 0,02898 |
| ENSMUSG00000038725 | Pkhd1l1    | -2,352679968 | 0,029   |
| ENSMUSG00000022913 | Psmg1      | 0,831480026  | 0,02902 |
| ENSMUSG00000022237 | Ankrd33b   | 0,887269974  | 0,02903 |
| ENSMUSG00000027185 | Nat10      | -0,34277001  | 0,02906 |
| ENSMUSG00000043336 | Filip1l    | -1,168089986 | 0,02907 |
| ENSMUSG00000074802 | Gas2l3     | -0,908959985 | 0,02907 |
| ENSMUSG00000026608 | Kctd3      | -0,89301002  | 0,02907 |
| ENSMUSG00000066235 | Pomgnt2    | -0,485410005 | 0,02912 |
| ENSMUSG00000038781 | Stap2      | 0,925769985  | 0,02913 |
| ENSMUSG00000047040 | Prr15l     | -1,342599988 | 0,02917 |
| ENSMUSG00000000759 | Tubgcp3    | -0,577279985 | 0,02918 |
| ENSMUSG00000031156 | Slc35a2    | -0,371950001 | 0,02919 |
| ENSMUSG00000022337 | Emc2       | 0,547039986  | 0,02924 |
| ENSMUSG00000022724 | Riox2      | 0,720269978  | 0,02929 |
| ENSMUSG00000019874 | Fabp7      | 1,237720013  | 0,02931 |
| ENSMUSG00000030002 | Dusp11     | -0,34788999  | 0,02933 |
| ENSMUSG00000027778 | Ift80      | -0,881529987 | 0,02935 |
| ENSMUSG00000005510 | Ndufs3     | 0,936370015  | 0,02937 |
| ENSMUSG00000029148 | Nrbp1      | -0,29242     | 0,02939 |
| ENSMUSG00000063808 | Gpatch1    | 0,449889988  | 0,02942 |
| ENSMUSG00000030346 | Rad51ap1   | -1,244179964 | 0,02946 |
| ENSMUSG00000024170 | Telo2      | -0,350589991 | 0,02948 |
| ENSMUSG00000010054 | Tusc2      | 0,676699996  | 0,02948 |
| ENSMUSG00000040528 | Milr1      | -0,942309976 | 0,02949 |
| ENSMUSG00000037225 | Fgf2       | -5,371829987 | 0,02951 |
| ENSMUSG00000031278 | Acsl4      | 0,358550012  | 0,02957 |
| ENSMUSG00000073563 | Csnk1g3    | -0,342559993 | 0,02958 |
| ENSMUSG00000027460 | Angpt4     | -3,618240118 | 0,02959 |
| ENSMUSG00000066363 | Serpina3f  | 1,481719971  | 0,0296  |
| ENSMUSG00000079442 | St6galnac4 | -0,756089985 | 0,02963 |

|                    |           |              |         |
|--------------------|-----------|--------------|---------|
| ENSMUSG00000022437 | Samm50    | 0,597899973  | 0,02968 |
| ENSMUSG00000034484 | Snx2      | -0,373679996 | 0,02969 |
| ENSMUSG00000041220 | Elovl6    | 1,070729971  | 0,02973 |
| ENSMUSG00000033365 | Ipo13     | -0,392199993 | 0,02978 |
| ENSMUSG00000029482 | Aacs      | 0,955619991  | 0,02979 |
| ENSMUSG00000040554 | Aipl1     | -4,900219917 | 0,02981 |
| ENSMUSG00000039804 | Ncoa5     | -0,629750013 | 0,02985 |
| ENSMUSG00000074340 | Ovgp1     | -1,523669958 | 0,02995 |
| ENSMUSG00000019528 | Gyg       | -0,526960015 | 0,02997 |
| ENSMUSG00000009555 | Cdk9      | -0,652339995 | 0,03    |
| ENSMUSG00000032547 | Ryk       | -0,416649997 | 0,03001 |
| ENSMUSG00000071356 | Reg3b     | -3,157219887 | 0,03004 |
| ENSMUSG00000042363 | Lgalsl    | 0,918550014  | 0,03006 |
| ENSMUSG00000044139 | Prss53    | 1,733559966  | 0,03014 |
| ENSMUSG00000021453 | Gadd45g   | -1,62895     | 0,03017 |
| ENSMUSG00000074576 | Mocs3     | 0,469060004  | 0,03018 |
| ENSMUSG00000002963 | Pnkp      | 0,567319989  | 0,0302  |
| ENSMUSG00000031813 | Mvb12a    | 0,845470011  | 0,03023 |
| ENSMUSG00000020444 | Guk1      | 0,989470005  | 0,03023 |
| ENSMUSG00000022126 | Acod1     | 1,655840039  | 0,03028 |
| ENSMUSG00000029622 | Arpc1b    | -0,651560009 | 0,03034 |
| ENSMUSG00000023980 | Taf8      | -0,339540005 | 0,03034 |
| ENSMUSG00000035776 | Cd99l2    | 0,272300005  | 0,03037 |
| ENSMUSG00000032289 | Thsd4     | 1,298030019  | 0,03037 |
| ENSMUSG00000000248 | Clec2g    | -2,774729967 | 0,0304  |
| ENSMUSG00000027195 | Hsd17b12  | 0,472579986  | 0,0304  |
| ENSMUSG00000020634 | Ubxn2a    | 0,978690028  | 0,03044 |
| ENSMUSG00000058503 | Fam133b   | -0,508750021 | 0,03046 |
| ENSMUSG00000027075 | Slc43a1   | 1,068899989  | 0,03048 |
| ENSMUSG00000035578 | Iqcg      | 0,955569983  | 0,0305  |
| ENSMUSG00000022964 | Tmem50b   | -0,637809992 | 0,03052 |
| ENSMUSG00000031837 | Necab2    | 1,308899999  | 0,03054 |
| ENSMUSG00000027673 | Ndufb5    | 0,858259976  | 0,03056 |
| ENSMUSG00000009995 | Taz       | 0,396279991  | 0,03058 |
| ENSMUSG00000031353 | Rbbp7     | 0,443580002  | 0,03058 |
| ENSMUSG00000027579 | Srms      | 1,481850028  | 0,03058 |
| ENSMUSG00000049230 | Gm9833    | -1,384719968 | 0,03061 |
| ENSMUSG00000004364 | Cul3      | -0,393920004 | 0,03063 |
| ENSMUSG00000045594 | Glb1      | -0,472939998 | 0,03066 |
| ENSMUSG00000041479 | Syt15     | 1,18919003   | 0,03069 |
| ENSMUSG00000055435 | Maf       | 0,670799971  | 0,03072 |
| ENSMUSG00000021091 | Serpina3n | 1,22221005   | 0,03072 |
| ENSMUSG00000035131 | Brinp3    | -5,637589931 | 0,03077 |
| ENSMUSG00000016921 | Srsf6     | -0,214059994 | 0,03077 |
| ENSMUSG00000040888 | Gfer      | 0,907119989  | 0,03077 |
| ENSMUSG00000007817 | Zmiz1     | -1,110350013 | 0,0308  |
| ENSMUSG00000028631 | Kcnq4     | -1,381450057 | 0,03083 |

|                     |               |              |         |
|---------------------|---------------|--------------|---------|
| ENSMUSG00000066392  | Nrxn3         | -2,630219936 | 0,03085 |
| ENSMUSG00000028600  | Podn          | -1,090809941 | 0,03085 |
| ENSMUSG00000053333  | Dis3l2        | 0,457289994  | 0,03085 |
| ENSMUSG00000021811  | Dnajc9        | -0,562520027 | 0,0309  |
| ENSMUSG00000055943  | Emc7          | 0,469940007  | 0,03091 |
| ENSMUSG00000025040  | Fundc1        | -0,505959988 | 0,03092 |
| ENSMUSG00000036120  | Rfxank        | 0,588199973  | 0,03092 |
| ENSMUSG00000005034  | Prkacb        | -0,423119992 | 0,03093 |
| ENSMUSG00000040466  | Blvrb         | 1,051810026  | 0,03093 |
| ENSMUSG00000041673  | Lrrc18        | 1,81340003   | 0,03095 |
| ENSMUSG00000023249  | Parp3         | 0,643480003  | 0,03101 |
| ENSMUSG00000079614  | Seh1l         | -0,489850014 | 0,03102 |
| ENSMUSG00000040123  | Zmym5         | 0,329670012  | 0,03105 |
| ENSMUSG00000005936  | Kctd20        | -0,346760005 | 0,03107 |
| ENSMUSG00000023923  | Tbc1d5        | 0,503279984  | 0,03107 |
| ENSMUSG00000022974  | Paxbp1        | -0,946309984 | 0,03108 |
| ENSMUSG00000029027  | Dffb          | -0,587909997 | 0,03109 |
| ENSMUSG00000020773  | Trim47        | -0,849529982 | 0,0311  |
| ENSMUSG00000015335  | Zdhhc12       | -0,798709989 | 0,03111 |
| ENSMUSG00000021606  | Ndufs6        | 1,189929962  | 0,03117 |
| ENSMUSG00000042607  | Asb4          | -1,392529964 | 0,03123 |
| ENSMUSG00000059834  | Sc1t1         | 0,41663      | 0,03123 |
| ENSMUSG00000043017  | Ptgir         | -1,683410048 | 0,03131 |
| ENSMUSG00000026563  | Tada1         | -0,326929986 | 0,03147 |
| ENSMUSG00000074794  | Arrdc3        | 1,022670031  | 0,03148 |
| ENSMUSG00000022571  | Pycl          | 0,730870008  | 0,03153 |
| ENSMUSG00000006288  | Ttc5          | -0,534049988 | 0,03154 |
| ENSMUSG00000019139  | Isyna1        | -0,859210014 | 0,03155 |
| ENSMUSG00000033434  | Gtpbp6        | -0,462199986 | 0,03156 |
| ENSMUSG000000064179 | Tnnt1         | 1,210420012  | 0,03158 |
| ENSMUSG00000045438  | Cox19         | 0,863470018  | 0,03168 |
| ENSMUSG00000076490  | Trbc1         | 1,537660003  | 0,03175 |
| ENSMUSG00000017264  | Exosc10       | -0,363920003 | 0,03176 |
| ENSMUSG00000039599  | Fam149b       | 0,585049987  | 0,03177 |
| ENSMUSG00000074892  | B3galt5       | -4,053380013 | 0,03178 |
| ENSMUSG00000016386  | Mpped2        | -1,569829941 | 0,03182 |
| ENSMUSG00000035847  | Ids           | -0,524689972 | 0,03182 |
| ENSMUSG00000024665  | Fads2         | 1,510929942  | 0,03183 |
| ENSMUSG00000032412  | Atp1b3        | -0,732980013 | 0,03189 |
| ENSMUSG00000024900  | Cpt1a         | 1,018669963  | 0,03193 |
| ENSMUSG00000047045  | Tmem164       | -0,498189986 | 0,03194 |
| ENSMUSG00000028362  | Tnfsf8        | -1,513339996 | 0,03195 |
| ENSMUSG00000026831  | 1700007K13Rik | -1,815039992 | 0,032   |
| ENSMUSG00000006398  | Cdc20         | -1,147089958 | 0,03204 |
| ENSMUSG00000021363  | Mak           | -2,128590107 | 0,03205 |
| ENSMUSG00000014075  | Tctex1d2      | -1,114510059 | 0,03207 |
| ENSMUSG00000039230  | Tbcd          | 0,393099993  | 0,03207 |

|                    |          |              |         |
|--------------------|----------|--------------|---------|
| ENSMUSG00000038086 | Hspb2    | -1,343500018 | 0,03221 |
| ENSMUSG00000079055 | Slc8a3   | -1,999060035 | 0,03226 |
| ENSMUSG00000026778 | Prkcq    | 1,189129949  | 0,03239 |
| ENSMUSG00000044938 | Klhl31   | 2,7177701    | 0,03243 |
| ENSMUSG00000059363 | Fxn      | 0,936580002  | 0,03245 |
| ENSMUSG00000052551 | Adarb2   | 3,208159924  | 0,0325  |
| ENSMUSG00000037646 | Vps13b   | 0,906379998  | 0,03252 |
| ENSMUSG00000023132 | Gzma     | 1,806800008  | 0,03253 |
| ENSMUSG00000026385 | Dbi      | 1,320880055  | 0,03256 |
| ENSMUSG00000039568 | Ubald1   | -0,384359986 | 0,03261 |
| ENSMUSG00000026701 | Prdx6    | 0,894680023  | 0,03261 |
| ENSMUSG00000021789 | Sftpa1   | 1,346169949  | 0,03265 |
| ENSMUSG00000041958 | Pigs     | -0,322939992 | 0,03268 |
| ENSMUSG00000026247 | Ecel1    | -5,194039822 | 0,03271 |
| ENSMUSG00000031796 | Cfap20   | 0,571060002  | 0,03273 |
| ENSMUSG00000029007 | Agtrap   | -0,715240002 | 0,03274 |
| ENSMUSG00000053004 | Hrh1     | -1,940790057 | 0,03277 |
| ENSMUSG00000039236 | Isg20    | -0,996150017 | 0,03277 |
| ENSMUSG00000051747 | Ttn      | -3,200740099 | 0,03278 |
| ENSMUSG00000026887 | Mrrf     | 0,655579984  | 0,03281 |
| ENSMUSG00000026650 | Meig1    | -2,410239935 | 0,03284 |
| ENSMUSG00000089824 | Rbm12    | -0,617770016 | 0,03287 |
| ENSMUSG00000067567 | Hdac8    | 0,450610012  | 0,03289 |
| ENSMUSG00000005267 | Zfp287   | -1,20231998  | 0,03293 |
| ENSMUSG00000036975 | Tmem177  | 0,690649986  | 0,03296 |
| ENSMUSG00000027508 | Pag1     | -0,897390008 | 0,03297 |
| ENSMUSG00000030207 | Fam234b  | 0,852580011  | 0,03302 |
| ENSMUSG00000019088 | Dnase1l1 | -0,805040002 | 0,03303 |
| ENSMUSG00000001785 | Pwp1     | -0,324349999 | 0,03306 |
| ENSMUSG00000048720 | Tbc1d12  | -0,465920001 | 0,0331  |
| ENSMUSG00000027863 | Cd2      | 1,204599977  | 0,03311 |
| ENSMUSG00000038010 | Ccdc138  | 0,608720005  | 0,03318 |
| ENSMUSG00000032754 | Slc8b1   | 0,575420022  | 0,03323 |
| ENSMUSG00000023092 | Fhl1     | -0,684939981 | 0,03324 |
| ENSMUSG00000017607 | Tns4     | -1,056579947 | 0,03326 |
| ENSMUSG00000021385 | Ippk     | -0,34683001  | 0,03327 |
| ENSMUSG00000059474 | Mbtd1    | -0,503830016 | 0,03328 |
| ENSMUSG00000013974 | Mcomp1   | -1,752200007 | 0,03329 |
| ENSMUSG00000038193 | Hand2    | -1,040300012 | 0,03332 |
| ENSMUSG00000043822 | Adamts15 | -1,120759964 | 0,03335 |
| ENSMUSG00000016200 | Syt14    | -3,455529928 | 0,03341 |
| ENSMUSG00000027395 | Polr1b   | -0,532299995 | 0,03341 |
| ENSMUSG00000012443 | Kif11    | -1,098330021 | 0,03344 |
| ENSMUSG00000024539 | Ptpn2    | -0,620760024 | 0,03344 |
| ENSMUSG00000043131 | Mob1a    | -0,422049999 | 0,03348 |
| ENSMUSG00000020359 | Phykpl   | 0,437249988  | 0,03349 |
| ENSMUSG00000025602 | Zfp202   | -0,778020024 | 0,03351 |

|                    |               |              |         |
|--------------------|---------------|--------------|---------|
| ENSMUSG00000020576 | Nbas          | 0,771730006  | 0,03351 |
| ENSMUSG00000027242 | Wdr76         | -0,706250012 | 0,03352 |
| ENSMUSG00000036805 | Noxa1         | -1,690260053 | 0,03357 |
| ENSMUSG00000025648 | Pfkfb4        | -1,039409995 | 0,03359 |
| ENSMUSG00000006587 | Snai3         | 2,199769974  | 0,0336  |
| ENSMUSG00000027376 | Prom2         | -2,676399946 | 0,0337  |
| ENSMUSG00000078851 | Hist3h2a      | -0,866370022 | 0,03371 |
| ENSMUSG00000025165 | Sectm1a       | 1,470890045  | 0,03371 |
| ENSMUSG00000084479 | Gm26424       | 3,969039917  | 0,03371 |
| ENSMUSG00000020261 | Slc36a1       | 0,802479982  | 0,03373 |
| ENSMUSG00000021610 | Clptm1l       | 0,330119997  | 0,03375 |
| ENSMUSG00000040158 | Tax1bp3       | -0,773479998 | 0,03376 |
| ENSMUSG00000075324 | Figf          | 0,878610015  | 0,03379 |
| ENSMUSG00000024033 | Rsph1         | -1,572379947 | 0,0339  |
| ENSMUSG00000027716 | Trpc3         | -1,570819974 | 0,03392 |
| ENSMUSG00000039910 | Cited2        | -0,680850029 | 0,03398 |
| ENSMUSG00000048562 | Sp8           | -8,766440392 | 0,03399 |
| ENSMUSG00000031059 | Ndufb11       | 1,070629954  | 0,03399 |
| ENSMUSG00000088219 | Gm22077       | -2,674050093 | 0,03403 |
| ENSMUSG00000028191 | Bcl10         | -0,569389999 | 0,03404 |
| ENSMUSG00000022076 | Klhl1         | -10,93437004 | 0,03414 |
| ENSMUSG00000017843 | Ppp2r5c       | -0,401250005 | 0,03417 |
| ENSMUSG00000021958 | Pinx1         | -0,506560028 | 0,03421 |
| ENSMUSG00000006589 | Aprt          | -1,211069942 | 0,03428 |
| ENSMUSG00000019731 | Slc35e1       | 0,560119987  | 0,0343  |
| ENSMUSG00000044350 | Lacc1         | 0,695909977  | 0,03435 |
| ENSMUSG00000022550 | Adck5         | 0,549730003  | 0,03437 |
| ENSMUSG00000020648 | Dus4l         | 0,499819994  | 0,03446 |
| ENSMUSG00000044098 | Rsb1          | -1,862390041 | 0,03455 |
| ENSMUSG00000003680 | Taf6l         | -0,736989975 | 0,03459 |
| ENSMUSG00000037887 | Dusp8         | -0,951430023 | 0,03462 |
| ENSMUSG00000035085 | 1700020L24Rik | -1,888399959 | 0,03463 |
| ENSMUSG00000031652 | N4bp1         | -0,520399988 | 0,03463 |
| ENSMUSG00000015869 | Prpsap1       | 0,479589999  | 0,03463 |
| ENSMUSG00000079434 | Neu2          | 1,071130037  | 0,03466 |
| ENSMUSG00000056071 | S100a9        | -1,731699944 | 0,03467 |
| ENSMUSG00000026709 | Dars2         | 0,624719977  | 0,03469 |
| ENSMUSG00000026548 | Slamf9        | -1,366320014 | 0,0347  |
| ENSMUSG00000036752 | Tubb4b        | 0,464769989  | 0,03473 |
| ENSMUSG00000041921 | Metap1d       | 0,636720002  | 0,03473 |
| ENSMUSG00000039585 | Myo9a         | -0,789250016 | 0,0348  |
| ENSMUSG00000029869 | Ephb6         | -1,031640053 | 0,03482 |
| ENSMUSG00000028869 | Gnl2          | -0,324829996 | 0,03484 |
| ENSMUSG00000034127 | Tspan8        | 1,420580029  | 0,03487 |
| ENSMUSG00000031955 | Bcar1         | -0,415019989 | 0,03488 |
| ENSMUSG00000005514 | Por           | 0,934210002  | 0,03491 |
| ENSMUSG00000051682 | Trem14        | 1,081760049  | 0,03503 |



|                     |          |              |         |
|---------------------|----------|--------------|---------|
| ENSMUSG00000048327  | Ckap2l   | -1,430549979 | 0,03504 |
| ENSMUSG00000002416  | Ndufb2   | 0,583270013  | 0,03504 |
| ENSMUSG000000032089 | Il10ra   | -0,652520001 | 0,03505 |
| ENSMUSG000000021396 | Nxn12    | -2,374039888 | 0,03508 |
| ENSMUSG000000026987 | Baz2b    | -0,588620007 | 0,0351  |
| ENSMUSG000000025229 | Pitx3    | 3,082890034  | 0,03517 |
| ENSMUSG000000052934 | Fbxo31   | 0,759540021  | 0,03522 |
| ENSMUSG000000009772 | Nuak2    | 0,667410016  | 0,03531 |
| ENSMUSG000000032014 | Oaf      | 0,828079998  | 0,03533 |
| ENSMUSG000000014039 | Prdm15   | -0,71153003  | 0,03539 |
| ENSMUSG000000024096 | Ralbp1   | -0,320969999 | 0,03539 |
| ENSMUSG000000050234 | Gja4     | 1,186130047  | 0,03539 |
| ENSMUSG000000075318 | Scn2a    | -3,423949957 | 0,03544 |
| ENSMUSG000000062737 | Prl3d2   | -10,85404015 | 0,03548 |
| ENSMUSG000000048965 | Mrgpre   | 0,578209996  | 0,0355  |
| ENSMUSG000000032193 | Ldlr     | 0,792469978  | 0,03551 |
| ENSMUSG000000050945 | Zfp438   | -0,549269974 | 0,03558 |
| ENSMUSG000000038365 | Fbxo25   | -0,368129998 | 0,03564 |
| ENSMUSG000000021361 | Tmem14c  | 0,826650023  | 0,03567 |
| ENSMUSG000000041445 | Mmrn2    | 0,710370004  | 0,03571 |
| ENSMUSG000000017417 | Plxdc1   | -1,189039946 | 0,03574 |
| ENSMUSG000000022842 | Ece2     | 0,604529977  | 0,03574 |
| ENSMUSG000000019790 | Stxbp5   | -0,648909986 | 0,03579 |
| ENSMUSG000000014353 | Tmem87b  | -0,439520001 | 0,03582 |
| ENSMUSG000000057342 | Sphk2    | 0,618309975  | 0,03582 |
| ENSMUSG000000036093 | Arl5a    | 0,517759979  | 0,03585 |
| ENSMUSG000000029503 | P2rx2    | -2,261349916 | 0,03586 |
| ENSMUSG000000024725 | Ostf1    | -0,744830012 | 0,03588 |
| ENSMUSG000000050663 | Trhde    | 2,157190084  | 0,0359  |
| ENSMUSG000000027878 | Notch2   | -0,765479982 | 0,03593 |
| ENSMUSG000000055633 | Zfp580   | -1,240309954 | 0,03601 |
| ENSMUSG000000028582 | Cc2d1b   | -0,397619992 | 0,03601 |
| ENSMUSG000000028514 | Usp24    | 0,780200005  | 0,03601 |
| ENSMUSG000000020059 | Sycp3    | 1,657870054  | 0,03614 |
| ENSMUSG000000018569 | Cldn7    | -1,22902     | 0,03615 |
| ENSMUSG000000031513 | Leprotl1 | -0,600210011 | 0,03618 |
| ENSMUSG000000039182 | AW209491 | 0,417129993  | 0,03622 |
| ENSMUSG000000016529 | Il10     | -2,045520067 | 0,03628 |
| ENSMUSG000000031516 | Dctn6    | -0,620570004 | 0,0363  |
| ENSMUSG000000052736 | Klrc2    | -2,762150049 | 0,03634 |
| ENSMUSG000000034613 | Ppm1h    | 0,676680028  | 0,03638 |
| ENSMUSG000000024677 | Ms4a6b   | -0,917580009 | 0,03641 |
| ENSMUSG000000004264 | Phb2     | 0,461030006  | 0,03643 |
| ENSMUSG000000022580 | Rhpn1    | -1,716249943 | 0,03644 |
| ENSMUSG000000031962 | Cdh15    | -1,600960016 | 0,03647 |
| ENSMUSG000000016344 | Pdpdf    | 0,950519979  | 0,0365  |
| ENSMUSG000000015970 | Chdh     | 1,539059997  | 0,0365  |

|                    |          |              |         |
|--------------------|----------|--------------|---------|
| ENSMUSG00000028669 | Pithd1   | 0,596539974  | 0,03651 |
| ENSMUSG00000038990 | Cables2  | 0,494210005  | 0,03655 |
| ENSMUSG00000036053 | Fmnl2    | -0,957780004 | 0,03656 |
| ENSMUSG00000061911 | Myt1l    | -6,563610077 | 0,03659 |
| ENSMUSG00000036617 | Etl4     | -0,90030998  | 0,03661 |
| ENSMUSG00000032125 | Robo4    | 0,623170018  | 0,03662 |
| ENSMUSG00000079562 | Maea     | -0,336650014 | 0,03665 |
| ENSMUSG00000001924 | Uba1     | -0,469309986 | 0,03675 |
| ENSMUSG00000096883 | Shisa8   | -3,19588995  | 0,03676 |
| ENSMUSG00000019923 | Zwint    | -0,343030006 | 0,03677 |
| ENSMUSG00000009739 | Pou6f1   | -0,561020017 | 0,03682 |
| ENSMUSG00000035694 | Caps2    | -3,099370003 | 0,03685 |
| ENSMUSG00000032850 | Rnft2    | -1,908179998 | 0,0369  |
| ENSMUSG00000028465 | Tln1     | -0,62559998  | 0,03691 |
| ENSMUSG00000002103 | Acp2     | 0,4384       | 0,03693 |
| ENSMUSG00000060261 | Gtf2i    | 0,396109998  | 0,03694 |
| ENSMUSG00000046634 | Pkd1l1   | -4,21532011  | 0,03697 |
| ENSMUSG00000025103 | Btbd1    | 0,277429998  | 0,03698 |
| ENSMUSG00000024764 | Naa40    | -0,367020011 | 0,037   |
| ENSMUSG00000069089 | Cdk7     | -0,306529999 | 0,037   |
| ENSMUSG00000053754 | Chd8     | -0,631049991 | 0,03709 |
| ENSMUSG00000024382 | Ercc3    | -0,326819986 | 0,03711 |
| ENSMUSG00000034487 | Kdelc2   | -0,31329     | 0,03711 |
| ENSMUSG00000038039 | Gcc2     | 0,537670016  | 0,03714 |
| ENSMUSG00000035275 | Raver2   | 1,25474      | 0,03717 |
| ENSMUSG00000061410 | Zcchc14  | -0,706089973 | 0,03718 |
| ENSMUSG00000033228 | Scaf11   | -0,583130002 | 0,0372  |
| ENSMUSG00000048174 | Tmem81   | -0,554509997 | 0,03729 |
| ENSMUSG00000028838 | Extl1    | 1,318719983  | 0,03729 |
| ENSMUSG00000024213 | Nudt3    | -0,815429986 | 0,03732 |
| ENSMUSG00000068329 | Htra2    | -0,508059978 | 0,03734 |
| ENSMUSG00000048655 | Ccdc169  | -3,761970043 | 0,03737 |
| ENSMUSG00000040605 | Bace2    | -0,69352001  | 0,03741 |
| ENSMUSG00000096255 | Dynlt1b  | -1,090389967 | 0,03743 |
| ENSMUSG00000033082 | Clec1a   | 0,92009002   | 0,03751 |
| ENSMUSG00000040767 | Snrnp25  | -1,066499949 | 0,03757 |
| ENSMUSG00000041959 | S100a10  | -1,012500048 | 0,03757 |
| ENSMUSG00000004328 | Hif3a    | -4,089419842 | 0,03773 |
| ENSMUSG00000026516 | Nvl      | -0,853370011 | 0,03774 |
| ENSMUSG00000020599 | Rgs9     | -1,776579976 | 0,03775 |
| ENSMUSG00000028894 | Inpp5b   | 0,970229983  | 0,03776 |
| ENSMUSG00000018931 | Natd1    | -0,615360022 | 0,03781 |
| ENSMUSG00000043683 | Fem1a    | 0,354550004  | 0,03787 |
| ENSMUSG00000029993 | Nfu1     | 0,668299973  | 0,03791 |
| ENSMUSG00000026775 | Yme1l1   | 0,355360001  | 0,03793 |
| ENSMUSG00000029432 | Nipsnap2 | -0,633379996 | 0,03794 |
| ENSMUSG00000020650 | Bcap29   | 0,413690001  | 0,03794 |

|                    |          |              |         |
|--------------------|----------|--------------|---------|
| ENSMUSG00000028445 | Enho     | 1,599060059  | 0,03797 |
| ENSMUSG00000073791 | Efcab7   | -1,304100037 | 0,03804 |
| ENSMUSG00000026077 | Npas2    | 2,020950079  | 0,03804 |
| ENSMUSG00000033161 | Atp1a1   | 0,605769992  | 0,03806 |
| ENSMUSG00000014867 | Surf4    | 0,328590006  | 0,03808 |
| ENSMUSG00000067873 | Htatsf1  | 0,183669999  | 0,0381  |
| ENSMUSG00000045973 | Slc25a51 | -0,539420009 | 0,03811 |
| ENSMUSG00000037085 | Trmt12   | -0,458490014 | 0,03811 |
| ENSMUSG00000031711 | Zfp330   | -0,327149987 | 0,03813 |
| ENSMUSG00000027641 | Rbl1     | -0,740170002 | 0,03814 |
| ENSMUSG00000065947 | mt-Nd4l  | 0,991069973  | 0,03814 |
| ENSMUSG00000027775 | Mfsd1    | 0,308530003  | 0,03815 |
| ENSMUSG00000035458 | Tnni3    | -1,526110053 | 0,03818 |
| ENSMUSG00000090946 | Ccdc71l  | -0,621029973 | 0,03822 |
| ENSMUSG00000025204 | Ndufb8   | 0,611880004  | 0,03822 |
| ENSMUSG00000005161 | Prdx2    | -0,893999994 | 0,03825 |
| ENSMUSG00000015095 | Fbxw5    | 0,277330011  | 0,03827 |
| ENSMUSG00000032456 | Nmnat3   | 0,62322998   | 0,03827 |
| ENSMUSG00000030641 | Ddias    | -0,785619974 | 0,0383  |
| ENSMUSG00000004933 | Matk     | -1,206570029 | 0,03831 |
| ENSMUSG00000038506 | Dcun1d2  | 0,357109994  | 0,03831 |
| ENSMUSG00000031826 | Usp10    | 0,492359996  | 0,03833 |
| ENSMUSG00000033557 | Fam20b   | -0,473650008 | 0,03836 |
| ENSMUSG00000044857 | Lemd2    | -0,490979999 | 0,03849 |
| ENSMUSG00000053870 | Fpgt     | 0,45927      | 0,03851 |
| ENSMUSG00000027422 | Rrbp1    | 0,648930013  | 0,03857 |
| ENSMUSG00000021944 | Gata4    | 0,818660021  | 0,0386  |
| ENSMUSG00000028334 | Nans     | -0,55795002  | 0,03862 |
| ENSMUSG00000004612 | Nkg7     | 1,359699965  | 0,03862 |
| ENSMUSG00000025626 | Phf6     | -0,473560005 | 0,0387  |
| ENSMUSG00000024844 | Banf1    | -0,689809978 | 0,03879 |
| ENSMUSG00000039457 | Ppl      | 1,117849946  | 0,0388  |
| ENSMUSG00000026220 | Slc16a14 | -6,193990231 | 0,03885 |
| ENSMUSG00000028358 | Zfp618   | -1,183109999 | 0,03885 |
| ENSMUSG00000026005 | Rpe      | 0,341470003  | 0,03887 |
| ENSMUSG00000046916 | Myct1    | 0,866970003  | 0,03888 |
| ENSMUSG00000031129 | Slc9a9   | 0,663049996  | 0,03894 |
| ENSMUSG00000064158 | Izumo1   | 4,12650013   | 0,03894 |
| ENSMUSG00000012429 | Mplkip   | -0,582819998 | 0,03897 |
| ENSMUSG00000026185 | Igfbp5   | -1,615990043 | 0,03898 |
| ENSMUSG00000068966 | Zbtb34   | -0,701189995 | 0,03902 |
| ENSMUSG00000029372 | Ppbp     | -1,468999982 | 0,03908 |
| ENSMUSG00000018999 | Slc35b4  | 0,383350015  | 0,03911 |
| ENSMUSG00000023966 | Rsph9    | -1,15605998  | 0,03912 |
| ENSMUSG00000047428 | Dlk2     | -3,587369919 | 0,03913 |
| ENSMUSG00000031858 | Mau2     | -0,621999979 | 0,03931 |
| ENSMUSG00000049470 | Aff4     | -0,616869986 | 0,03932 |

|                    |         |              |         |
|--------------------|---------|--------------|---------|
| ENSMUSG00000039047 | Pigk    | 0,363440007  | 0,03932 |
| ENSMUSG00000032411 | Tfdp2   | 0,402559996  | 0,03933 |
| ENSMUSG00000022139 | Mbnl2   | -0,79124999  | 0,03937 |
| ENSMUSG00000041361 | Myzap   | 1,02662003   | 0,03943 |
| ENSMUSG00000025878 | Uimc1   | 0,221799999  | 0,03946 |
| ENSMUSG00000025020 | Slit1   | -1,578230023 | 0,0395  |
| ENSMUSG00000024966 | Stip1   | -0,440730006 | 0,03952 |
| ENSMUSG00000001520 | Nrip2   | 1,29005003   | 0,03952 |
| ENSMUSG00000024211 | Grm8    | 1,58434999   | 0,03957 |
| ENSMUSG00000008932 | Slc1a7  | -4,157849789 | 0,03963 |
| ENSMUSG00000033987 | Dnah17  | -1,433830023 | 0,03969 |
| ENSMUSG00000025779 | Ly96    | 0,716690004  | 0,03969 |
| ENSMUSG00000047963 | Stbd1   | 0,881609976  | 0,03969 |
| ENSMUSG00000015943 | Bola1   | 0,960370004  | 0,03971 |
| ENSMUSG00000055809 | Dnaaf3  | -1,023710012 | 0,03975 |
| ENSMUSG00000071054 | Safb    | -0,308569998 | 0,03976 |
| ENSMUSG00000032998 | Foxj3   | -0,542729974 | 0,03978 |
| ENSMUSG00000003779 | Kif20a  | -1,559000015 | 0,03982 |
| ENSMUSG00000029723 | Tsc22d4 | -0,685790002 | 0,03982 |
| ENSMUSG00000028700 | Pomgnt1 | -0,37026     | 0,03988 |
| ENSMUSG00000059554 | Ccdc28a | 0,719089985  | 0,03992 |
| ENSMUSG00000046756 | Mrps7   | 0,636399984  | 0,03995 |
| ENSMUSG00000023979 | Guca1b  | -1,672860026 | 0,03997 |
| ENSMUSG00000030603 | Psmc4   | 0,592390001  | 0,03997 |
| ENSMUSG00000021962 | Dcp1a   | -0,694819987 | 0,04001 |
| ENSMUSG00000041477 | Dcp1b   | 0,58732003   | 0,04001 |
| ENSMUSG00000031111 | Igsf1   | 1,320050001  | 0,04002 |
| ENSMUSG00000030595 | Nfkbib  | 0,667469978  | 0,04003 |
| ENSMUSG00000020437 | Myo1g   | -0,704980016 | 0,04004 |
| ENSMUSG00000025386 | Pde6g   | 1,310940027  | 0,04009 |
| ENSMUSG00000043051 | Disc1   | -1,399359941 | 0,0401  |
| ENSMUSG00000049680 | Urgcp   | -0,387809992 | 0,04018 |
| ENSMUSG00000028398 | Dmac1   | 0,955489993  | 0,04018 |
| ENSMUSG00000010797 | Wnt2    | -1,128749967 | 0,04019 |
| ENSMUSG00000027742 | Cog6    | 0,517530024  | 0,04022 |
| ENSMUSG00000036960 | Clca2   | -5,74421978  | 0,04025 |
| ENSMUSG00000009350 | Mpo     | -3,100909948 | 0,04026 |
| ENSMUSG00000060992 | Copz1   | 0,692969978  | 0,04026 |
| ENSMUSG00000027849 | Syt6    | -6,058670044 | 0,04028 |
| ENSMUSG00000032469 | Dbr1    | -0,38793999  | 0,04033 |
| ENSMUSG00000040270 | Bach2   | 1,152240038  | 0,0404  |
| ENSMUSG00000030206 | Gsg1    | -2,661309958 | 0,04041 |
| ENSMUSG00000045107 | Saysd1  | 1,064720035  | 0,04041 |
| ENSMUSG00000051726 | Kcnf1   | -10,57709026 | 0,04044 |
| ENSMUSG00000021681 | Aggf1   | -0,219119996 | 0,04067 |
| ENSMUSG00000022376 | Adcy8   | -2,764159918 | 0,04069 |
| ENSMUSG00000037349 | Nudt22  | 0,636919975  | 0,04069 |

|                    |               |              |         |
|--------------------|---------------|--------------|---------|
| ENSMUSG00000087006 | Gm13889       | -1,067420006 | 0,0407  |
| ENSMUSG00000013593 | Ndufs2        | 0,543540001  | 0,0408  |
| ENSMUSG00000033882 | Rbm46         | -2,230839968 | 0,04082 |
| ENSMUSG00000006435 | Neur11a       | 0,875630021  | 0,04087 |
| ENSMUSG00000074151 | Nlrc5         | 1,135939956  | 0,04088 |
| ENSMUSG00000071103 | 1700029J07Rik | -1,226940036 | 0,04094 |
| ENSMUSG00000060681 | Slc9a6        | 0,30765      | 0,04096 |
| ENSMUSG00000034854 | Mfsd12        | -0,551389992 | 0,04108 |
| ENSMUSG00000035890 | Rnf126        | -0,594060004 | 0,04109 |
| ENSMUSG00000028369 | Svep1         | -1,36018002  | 0,0411  |
| ENSMUSG00000035049 | Rrp12         | -0,507950008 | 0,04113 |
| ENSMUSG00000021392 | Nol8          | -0,386849999 | 0,0412  |
| ENSMUSG00000002319 | lpo4          | -0,407979995 | 0,04126 |
| ENSMUSG00000031221 | Igbp1         | 0,558899999  | 0,04133 |
| ENSMUSG00000045038 | Prkce         | 0,767780006  | 0,04133 |
| ENSMUSG00000046574 | Prr12         | -0,63714999  | 0,04135 |
| ENSMUSG00000029229 | Chic2         | -0,564949989 | 0,04135 |
| ENSMUSG00000034762 | Glis1         | -3,466660023 | 0,04137 |
| ENSMUSG00000003662 | Ciao1         | 0,426349998  | 0,04138 |
| ENSMUSG00000017146 | Brca1         | -0,814209998 | 0,04139 |
| ENSMUSG00000035557 | Krt17         | -2,508869886 | 0,04147 |
| ENSMUSG00000003199 | Mpnd          | 0,771820009  | 0,04149 |
| ENSMUSG00000017740 | Slc12a5       | 0,684149981  | 0,04157 |
| ENSMUSG00000027488 | Snta1         | 0,587469995  | 0,04165 |
| ENSMUSG00000025468 | Caly          | -3,037430048 | 0,04166 |
| ENSMUSG00000024544 | Ldlrad4       | -0,606450021 | 0,04167 |
| ENSMUSG00000053453 | Thoc7         | 0,406280011  | 0,04171 |
| ENSMUSG00000041642 | Kif21b        | -0,802649975 | 0,04174 |
| ENSMUSG00000070498 | Tmem132b      | -8,734649658 | 0,04178 |
| ENSMUSG00000067653 | Ankrd23       | -0,944400012 | 0,0418  |
| ENSMUSG00000030341 | Tnfrsf1a      | 0,503210008  | 0,0418  |
| ENSMUSG00000034947 | Tmem106a      | 0,707159996  | 0,04181 |
| ENSMUSG00000037463 | Fbxo27        | -2,747040033 | 0,04182 |
| ENSMUSG00000041837 | Pdcd7         | -0,436080009 | 0,04184 |
| ENSMUSG00000041498 | Kif14         | -1,883440018 | 0,04188 |
| ENSMUSG00000070493 | Chchd2        | 0,928269982  | 0,04192 |
| ENSMUSG00000023277 | Twf2          | -0,865649998 | 0,04198 |
| ENSMUSG00000020140 | Lgr5          | 1,101799965  | 0,04212 |
| ENSMUSG00000044313 | Mab2113       | -1,785459995 | 0,04213 |
| ENSMUSG00000041840 | Haus1         | -0,777350008 | 0,04216 |
| ENSMUSG00000035614 | Togaram1      | -0,428149998 | 0,04216 |
| ENSMUSG00000089917 | Uck1          | -0,321090013 | 0,04216 |
| ENSMUSG00000042305 | Tmem183a      | 0,447569996  | 0,04217 |
| ENSMUSG00000022993 | 4930415O20Rik | -2,299269915 | 0,04219 |
| ENSMUSG00000027574 | Nkain4        | -2,119009972 | 0,04227 |
| ENSMUSG00000026579 | F5            | 1,348080039  | 0,04227 |
| ENSMUSG00000036995 | Asap3         | 0,793099999  | 0,04229 |

|                    |          |              |         |
|--------------------|----------|--------------|---------|
| ENSMUSG00000038806 | Sde2     | -0,834410012 | 0,0423  |
| ENSMUSG00000031586 | Rbpms    | 0,606299996  | 0,0423  |
| ENSMUSG00000028070 | Naxe     | 0,771700025  | 0,04236 |
| ENSMUSG00000026131 | Dst      | -1,007840037 | 0,0424  |
| ENSMUSG00000050410 | Tcf19    | -0,56388998  | 0,04248 |
| ENSMUSG00000018509 | Cenv     | 0,767279983  | 0,04249 |
| ENSMUSG00000026594 | Ralgps2  | 0,514989972  | 0,04251 |
| ENSMUSG00000046159 | Chrm3    | 1,762740016  | 0,04256 |
| ENSMUSG00000027429 | Sec23b   | 0,571680009  | 0,04257 |
| ENSMUSG00000042429 | Adora1   | 1,124590039  | 0,04261 |
| ENSMUSG00000048865 | Arhgap30 | -0,664690018 | 0,04262 |
| ENSMUSG00000075044 | Slc22a29 | 1,727270007  | 0,04262 |
| ENSMUSG00000006998 | Psm2     | 0,237959996  | 0,04267 |
| ENSMUSG00000033918 | Parl     | 0,529609978  | 0,04268 |
| ENSMUSG00000032030 | Cu15     | -0,26958999  | 0,04269 |
| ENSMUSG00000019866 | Crybg1   | 0,66426003   | 0,04272 |
| ENSMUSG00000027342 | Pcna     | -0,574360013 | 0,04277 |
| ENSMUSG00000024535 | Snx24    | 0,33563      | 0,04277 |
| ENSMUSG00000025979 | Mob4     | -0,466829985 | 0,04282 |
| ENSMUSG00000020605 | Hs1bp3   | -0,347409993 | 0,04284 |
| ENSMUSG00000003644 | Rps6ka1  | 0,510200024  | 0,04285 |
| ENSMUSG00000006313 | Upk1a    | -2,469830036 | 0,04288 |
| ENSMUSG00000070733 | Fryl     | -0,737349987 | 0,04291 |
| ENSMUSG00000073418 | C4b      | 1,045330048  | 0,04295 |
| ENSMUSG00000016554 | Eif3d    | -0,592010021 | 0,04297 |
| ENSMUSG00000020014 | Cfap54   | -1,264969945 | 0,043   |
| ENSMUSG00000032013 | Trim29   | -2,746150017 | 0,04302 |
| ENSMUSG00000007038 | Neu1     | 0,58829999   | 0,04303 |
| ENSMUSG00000034918 | Cdhr2    | 1,678570032  | 0,04311 |
| ENSMUSG00000032105 | Pdzd3    | -2,784189939 | 0,04312 |
| ENSMUSG00000010607 | Pigyl    | 1,064069986  | 0,04312 |
| ENSMUSG00000094152 | Slc6a16  | 1,642279983  | 0,04313 |
| ENSMUSG00000021978 | Extl3    | -0,528569996 | 0,04315 |
| ENSMUSG00000014243 | Zswim7   | 1,065150023  | 0,04316 |
| ENSMUSG00000026571 | Dcaf6    | 0,422910005  | 0,04319 |
| ENSMUSG00000042167 | Tent2    | -0,300639987 | 0,04321 |
| ENSMUSG00000078453 | Abrac1   | -0,726339996 | 0,04327 |
| ENSMUSG00000024440 | Pcdh12   | 0,815649986  | 0,04331 |
| ENSMUSG00000031701 | Dnaja2   | 0,304500014  | 0,04341 |
| ENSMUSG00000032086 | Bace1    | -1,061750054 | 0,04345 |
| ENSMUSG00000047554 | Tmem41b  | 0,236289993  | 0,04347 |
| ENSMUSG00000025436 | Atp23    | 0,913089991  | 0,04347 |
| ENSMUSG00000034282 | Evpl     | -1,10405004  | 0,04352 |
| ENSMUSG00000049932 | H2afx    | -0,699209988 | 0,04358 |
| ENSMUSG00000024993 | Fam45a   | 0,289290011  | 0,04368 |
| ENSMUSG00000021990 | Spata13  | 0,705789983  | 0,04368 |
| ENSMUSG00000046561 | Arsj     | -8,321149826 | 0,04369 |

|                    |               |              |         |
|--------------------|---------------|--------------|---------|
| ENSMUSG0000008333  | Snrpb2        | -0,757160008 | 0,04378 |
| ENSMUSG00000050967 | Creg2         | -3,214709997 | 0,04381 |
| ENSMUSG00000024503 | Spink1        | 1,916610003  | 0,04385 |
| ENSMUSG00000022019 | Tdrd3         | -0,32438001  | 0,04386 |
| ENSMUSG00000042985 | Upk3b         | -2,054409981 | 0,04397 |
| ENSMUSG00000034042 | Gbp11         | 0,231629997  | 0,04401 |
| ENSMUSG00000090110 | Cmc4          | 0,707560003  | 0,04402 |
| ENSMUSG00000037001 | Zfp39         | 0,759509981  | 0,04404 |
| ENSMUSG00000027580 | Helz2         | 1,253939986  | 0,04417 |
| ENSMUSG00000028328 | Tmod1         | -3,092400074 | 0,0442  |
| ENSMUSG00000062604 | Srp2          | -0,58701998  | 0,04423 |
| ENSMUSG00000020925 | Ccdc43        | -0,310180008 | 0,04423 |
| ENSMUSG00000042810 | Krba1         | 0,789579988  | 0,04428 |
| ENSMUSG00000062591 | Tubb4a        | -1,49398005  | 0,04429 |
| ENSMUSG00000062691 | Cebpz         | 0,618189991  | 0,04431 |
| ENSMUSG00000022241 | Tars          | 0,571020007  | 0,04432 |
| ENSMUSG00000070605 | Zfp992        | 1,239580035  | 0,04437 |
| ENSMUSG00000054200 | Ffar4         | -1,770230055 | 0,04438 |
| ENSMUSG00000074227 | Spint2        | 1,117820024  | 0,04442 |
| ENSMUSG00000034525 | Ice1          | -0,894219995 | 0,04444 |
| ENSMUSG00000045441 | Gprin3        | 1,906190038  | 0,04447 |
| ENSMUSG00000020377 | Ltc4s         | -1,39120996  | 0,04454 |
| ENSMUSG00000049657 | Zbtb5         | 0,594410002  | 0,04454 |
| ENSMUSG00000027654 | Fam83d        | -1,408439994 | 0,04458 |
| ENSMUSG00000013701 | Timm23        | 0,48398      | 0,04458 |
| ENSMUSG00000063765 | Chadl         | -0,947489977 | 0,04464 |
| ENSMUSG00000052131 | Akr1b7        | 1,636489987  | 0,04466 |
| ENSMUSG00000026342 | Slc35f5       | 0,726509988  | 0,0447  |
| ENSMUSG00000060260 | Pwwp2b        | -0,727460027 | 0,04474 |
| ENSMUSG00000073643 | Wdfy1         | -0,586600006 | 0,04474 |
| ENSMUSG00000028539 | Artn          | -2,269520044 | 0,04474 |
| ENSMUSG00000013089 | Etv5          | -0,732050002 | 0,04482 |
| ENSMUSG00000014164 | Klhl3         | 1,825829983  | 0,04484 |
| ENSMUSG00000025102 | 3110040N11Rik | 0,822700024  | 0,04487 |
| ENSMUSG00000016024 | Lbp           | 0,865589976  | 0,0449  |
| ENSMUSG00000062190 | Lancl2        | 0,333149999  | 0,04495 |
| ENSMUSG00000021025 | Nfkb1a        | -0,567340016 | 0,04497 |
| ENSMUSG00000038406 | Scaf1         | -0,508180022 | 0,04503 |
| ENSMUSG00000006498 | Ptbp1         | -0,906799972 | 0,04507 |
| ENSMUSG00000040482 | Dxo           | 0,633149981  | 0,04509 |
| ENSMUSG00000090667 | Gm765         | 2,332289934  | 0,04517 |
| ENSMUSG00000040659 | Efh2          | -0,572380006 | 0,04519 |
| ENSMUSG00000022450 | Ndufa6        | 0,920340002  | 0,04522 |
| ENSMUSG00000027684 | Mecom         | -1,026759982 | 0,04524 |
| ENSMUSG00000020720 | Psm12         | 0,377849996  | 0,04528 |
| ENSMUSG00000091264 | Smim13        | 0,538070023  | 0,04528 |
| ENSMUSG00000038932 | Tcfl5         | -5,052360058 | 0,04537 |



|                     |          |              |         |
|---------------------|----------|--------------|---------|
| ENSMUSG00000003418  | St8sia6  | -1,898030043 | 0,04546 |
| ENSMUSG000000037621 | Atoh8    | 0,841859996  | 0,04546 |
| ENSMUSG000000034518 | Hmgxb4   | -0,595300019 | 0,0455  |
| ENSMUSG000000034664 | Itga2b   | -0,896390021 | 0,04559 |
| ENSMUSG000000044080 | S100a1   | 0,849489987  | 0,04566 |
| ENSMUSG000000025915 | Sgk3     | 0,802410007  | 0,04576 |
| ENSMUSG000000039716 | Dock3    | -1,479719996 | 0,04581 |
| ENSMUSG000000013833 | Med16    | 0,322459996  | 0,04586 |
| ENSMUSG000000057134 | Ado      | -0,41813001  | 0,04587 |
| ENSMUSG000000006127 | Inpp5k   | -0,39576     | 0,04591 |
| ENSMUSG000000022828 | Gtf2e1   | 0,483390003  | 0,04593 |
| ENSMUSG000000029474 | Rnf34    | -0,412640005 | 0,04594 |
| ENSMUSG000000039463 | Slc9a8   | 0,381799996  | 0,04608 |
| ENSMUSG000000031600 | Vps37a   | 0,365610003  | 0,04612 |
| ENSMUSG000000033847 | Pla2g4c  | -1,621170044 | 0,04615 |
| ENSMUSG000000024527 | Afg3l2   | 0,389809996  | 0,04619 |
| ENSMUSG000000031783 | Polr2c   | -0,587300003 | 0,04619 |
| ENSMUSG000000027257 | Pacsin3  | 0,627170026  | 0,04622 |
| ENSMUSG000000030533 | Unc45a   | -0,453579992 | 0,0463  |
| ENSMUSG000000020728 | Cep112   | -1,504909992 | 0,04631 |
| ENSMUSG000000034641 | Cd300ld  | 1,139729977  | 0,04631 |
| ENSMUSG000000021643 | Serf1    | -0,894500017 | 0,04632 |
| ENSMUSG000000032172 | Olfm2    | -1,052019954 | 0,04643 |
| ENSMUSG000000019817 | Plagl1   | -1,128190041 | 0,0465  |
| ENSMUSG000000033486 | Catsper2 | 0,393420011  | 0,04651 |
| ENSMUSG000000062110 | Scfd2    | 0,380519986  | 0,04656 |
| ENSMUSG000000027009 | Itga4    | -0,875670016 | 0,04662 |
| ENSMUSG000000035401 | Emsy     | -0,640779972 | 0,04668 |
| ENSMUSG000000041528 | Rnf123   | 1,07968998   | 0,04669 |
| ENSMUSG000000023886 | Smoc2    | -0,858929992 | 0,04674 |
| ENSMUSG000000057614 | Gnai1    | -0,899909973 | 0,04676 |
| ENSMUSG000000079507 | H2-Q1    | 1,309000015  | 0,04676 |
| ENSMUSG000000032656 | March3   | -0,748300016 | 0,04686 |
| ENSMUSG000000018821 | Avpi1    | 1,002779961  | 0,04687 |
| ENSMUSG000000044966 | Fbxo48   | -2,609529972 | 0,0469  |
| ENSMUSG000000000782 | Tcf7     | -0,518419981 | 0,0469  |
| ENSMUSG000000007880 | Arid1a   | -0,63015002  | 0,04696 |
| ENSMUSG000000031355 | Arhgap6  | -0,696290016 | 0,04698 |
| ENSMUSG000000024949 | Sf1      | -0,444379985 | 0,04701 |
| ENSMUSG000000055065 | Ddx17    | -0,768190026 | 0,04703 |
| ENSMUSG000000039835 | Nhsl1    | -0,981519997 | 0,04713 |
| ENSMUSG000000063362 | Alg11    | 0,375990003  | 0,04717 |
| ENSMUSG000000029086 | Prom1    | 1,519050002  | 0,04719 |
| ENSMUSG000000062170 | Fmr1nb   | 3,308429956  | 0,04725 |
| ENSMUSG000000024330 | Col11a2  | -0,885179996 | 0,04733 |
| ENSMUSG000000005677 | Nr1i3    | 1,229769945  | 0,04735 |
| ENSMUSG000000027273 | Snap25   | -4,067820072 | 0,04739 |

|                    |           |              |         |
|--------------------|-----------|--------------|---------|
| ENSMUSG00000064871 | Snord58b  | -2,307990074 | 0,04739 |
| ENSMUSG00000035606 | Ky        | -3,375780106 | 0,0474  |
| ENSMUSG00000019848 | Popdc3    | -2,784650087 | 0,04743 |
| ENSMUSG00000002881 | Nab1      | 0,630729973  | 0,04745 |
| ENSMUSG00000033444 | Specc1l   | -0,703059971 | 0,04746 |
| ENSMUSG00000021096 | Ppm1a     | 0,320560008  | 0,04747 |
| ENSMUSG00000024173 | Tpsab1    | 3,383229971  | 0,04749 |
| ENSMUSG00000005251 | Ripk4     | 0,707449973  | 0,04752 |
| ENSMUSG00000057246 | BC051142  | -3,149749994 | 0,04753 |
| ENSMUSG00000030707 | Coro1a    | -0,88053     | 0,0476  |
| ENSMUSG00000024002 | Brd4      | -0,560450017 | 0,0477  |
| ENSMUSG00000061533 | Cep128    | -1,07525003  | 0,04777 |
| ENSMUSG00000036199 | Ndufa13   | 1,027780056  | 0,04777 |
| ENSMUSG00000089704 | Galnt2    | -1,996760011 | 0,0478  |
| ENSMUSG00000023919 | Cenpq     | -0,44284001  | 0,04781 |
| ENSMUSG00000036863 | Syde2     | -0,887799978 | 0,04782 |
| ENSMUSG00000074513 | Arfp1     | -0,28075999  | 0,04788 |
| ENSMUSG00000058997 | Vwa8      | 0,835940003  | 0,04788 |
| ENSMUSG00000059602 | Syn3      | 1,026790023  | 0,04791 |
| ENSMUSG00000021319 | Sfrp4     | -1,614930034 | 0,04792 |
| ENSMUSG00000040372 | Gpr63     | -4,658599854 | 0,04799 |
| ENSMUSG00000030352 | Tspan9    | 0,404570013  | 0,04799 |
| ENSMUSG00000020289 | Nprl3     | -0,318560004 | 0,04807 |
| ENSMUSG00000079419 | Ms4a6c    | -0,846260011 | 0,04817 |
| ENSMUSG00000022744 | Cldnd1    | -0,549359977 | 0,04821 |
| ENSMUSG00000026279 | Thap4     | -0,431600004 | 0,04826 |
| ENSMUSG00000004113 | Cacna1b   | 2,05024004   | 0,04826 |
| ENSMUSG00000030521 | Mphosph10 | -0,342700005 | 0,04831 |
| ENSMUSG00000033083 | Tbc1d4    | -0,72477001  | 0,04835 |
| ENSMUSG00000029068 | Ccnl2     | -0,336589992 | 0,04836 |
| ENSMUSG00000014606 | Slc25a11  | 0,683300018  | 0,04836 |
| ENSMUSG00000020063 | Sirt1     | -0,42730999  | 0,04837 |
| ENSMUSG00000026698 | Pigc      | -0,386979997 | 0,04839 |
| ENSMUSG00000022013 | Dnajc15   | 1,014999986  | 0,04849 |
| ENSMUSG00000026975 | Dph7      | -0,501829982 | 0,04853 |
| ENSMUSG00000063849 | Ppcdc     | 0,334419996  | 0,04854 |
| ENSMUSG00000005949 | Ctns      | 0,565800011  | 0,04857 |
| ENSMUSG00000039678 | Tbc1d13   | -0,27008     | 0,04859 |
| ENSMUSG00000054428 | Atpif1    | -0,759370029 | 0,04868 |
| ENSMUSG00000048222 | Mfap1b    | -0,762090027 | 0,04878 |
| ENSMUSG00000045100 | Slc25a26  | 0,522469997  | 0,04878 |
| ENSMUSG00000033016 | Nfatc1    | -0,53302002  | 0,04892 |
| ENSMUSG00000047617 | Paxx      | 0,874930024  | 0,04898 |
| ENSMUSG00000051331 | Cacna1c   | -1,645239949 | 0,04908 |
| ENSMUSG00000024792 | Zfpl1     | -0,435090005 | 0,0491  |
| ENSMUSG00000025920 | Stau2     | -0,39497     | 0,04928 |
| ENSMUSG00000044626 | Liph      | -2,197770119 | 0,04929 |

|                    |         |              |         |
|--------------------|---------|--------------|---------|
| ENSMUSG00000037242 | Clic4   | -0,566999972 | 0,04938 |
| ENSMUSG00000056536 | Pign    | -0,743099988 | 0,0494  |
| ENSMUSG00000071172 | Srsf3   | -0,584900022 | 0,04941 |
| ENSMUSG00000020608 | Smc6    | -0,304639995 | 0,04941 |
| ENSMUSG00000046873 | Mbtps2  | -0,369139999 | 0,04949 |
| ENSMUSG00000003863 | Ppfia3  | -2,898869991 | 0,04952 |
| ENSMUSG00000031494 | Cd209a  | -2,495970011 | 0,04955 |
| ENSMUSG00000031266 | Gla     | -0,537710011 | 0,04956 |
| ENSMUSG00000023908 | Pkmyt1  | -0,883270025 | 0,0496  |
| ENSMUSG00000018401 | Mtmr4   | 0,632319987  | 0,04965 |
| ENSMUSG00000023755 | Rhebl1  | -0,971319973 | 0,04967 |
| ENSMUSG00000078429 | Ctdsp2  | -0,380650014 | 0,0497  |
| ENSMUSG00000032612 | Usp4    | 0,274989992  | 0,04976 |
| ENSMUSG00000026663 | Atf6    | 0,760479987  | 0,04986 |
| ENSMUSG00000029330 | Cds1    | -0,965900004 | 0,0499  |
| ENSMUSG00000038909 | Kat7    | -0,734489977 | 0,0499  |
| ENSMUSG00000003316 | Glg1    | -1,044620037 | 0,04992 |
| ENSMUSG00000031158 | Timm17b | 0,917999983  | 0,04999 |
