# Supplementary material
Source: HighWire-hosted journal article supplement (https://gut.bmj.com/content/gutjnl-2023-331237)
Supplement: inline-supplementary-material-4 [file inline-supplementary-material-4.pdf]

| geneid_mus musculus | symbol_mus musculus | Akt/Nicd Parp-1- vs. Akt/Nicd Parp-1+_log2fc | Akt/Nicd Parp-1- vs. Akt/Nicd Parp-1+_pvalue |
|---------------------|---------------------|----------------------------------------------|----------------------------------------------|
| ENSMUSG00000026535  | Ifi202b             | 8,03676033                                   | 0                                            |
| ENSMUSG00000026496  | Parp1               | -1,850190043                                 | 0                                            |
| ENSMUSG00000028354  | Fmn2                | 2,888420105                                  | 0                                            |
| ENSMUSG00000021087  | Rtn1                | -1,682629943                                 | 0,00003                                      |
| ENSMUSG00000049353  | Rd3                 | -3,759900093                                 | 0,00006                                      |
| ENSMUSG00000053461  | Hhipl2              | -2,710370064                                 | 0,0001                                       |
| ENSMUSG00000055865  | Fam19a3             | 5,122560024                                  | 0,00015                                      |
| ENSMUSG00000062737  | Prl3d2              | 19,8629303                                   | 0,00015                                      |
| ENSMUSG00000022434  | Fam118a             | -0,959529996                                 | 0,00055                                      |
| ENSMUSG00000046442  | Ppm1e               | 4,336299896                                  | 0,00071                                      |
| ENSMUSG00000037872  | Ackr1               | 1,805029988                                  | 0,00106                                      |
| ENSMUSG00000030790  | Adm                 | -2,064599991                                 | 0,00113                                      |
| ENSMUSG00000026833  | Olfm1               | -1,673779964                                 | 0,00179                                      |
| ENSMUSG00000062818  | Vmn1r51             | 1,789729953                                  | 0,00187                                      |
| ENSMUSG00000070524  | Fcrlb               | -2,961899996                                 | 0,00213                                      |
| ENSMUSG00000040856  | Dlk1                | 3,26357007                                   | 0,0022                                       |
| ENSMUSG00000022435  | Upk3a               | -2,863470078                                 | 0,00235                                      |
| ENSMUSG00000019890  | Nts                 | -2,327270031                                 | 0,00324                                      |
| ENSMUSG00000035557  | Krt17               | -2,738689899                                 | 0,00361                                      |
| ENSMUSG00000039997  | Ifi203              | 1,180989981                                  | 0,00444                                      |
| ENSMUSG00000026103  | Gls                 | -1,444239974                                 | 0,00487                                      |
| ENSMUSG00000058966  | Fam57b              | -1,740919948                                 | 0,00493                                      |
| ENSMUSG00000038415  | Foxq1               | -1,519189954                                 | 0,00505                                      |
| ENSMUSG00000039109  | F13a1               | -2,592109919                                 | 0,00551                                      |
| ENSMUSG00000025161  | Slc16a3             | -2,072580099                                 | 0,00555                                      |
| ENSMUSG00000035105  | Egln3               | -1,473520041                                 | 0,00585                                      |
| ENSMUSG00000037411  | Serpine1            | -2,353080034                                 | 0,00717                                      |
| ENSMUSG00000020092  | Pald1               | -0,570119977                                 | 0,00768                                      |
| ENSMUSG00000025784  | Clec3b              | 3,212769985                                  | 0,00781                                      |
| ENSMUSG00000032978  | Guca2b              | -2,629679918                                 | 0,00786                                      |
| ENSMUSG00000020788  | Atp2a3              | 1,115159988                                  | 0,00791                                      |
| ENSMUSG00000000628  | Hk2                 | -1,421839952                                 | 0,00801                                      |
| ENSMUSG00000021196  | Pfcp                | -1,380159974                                 | 0,00809                                      |
| ENSMUSG00000040857  | Erf                 | -0,42346999                                  | 0,00813                                      |
| ENSMUSG00000052949  | Rnf157              | -0,961019993                                 | 0,00927                                      |
| ENSMUSG00000026542  | Apcs                | 1,566179991                                  | 0,00933                                      |
| ENSMUSG00000000731  | Aire                | -2,97961998                                  | 0,00965                                      |
| ENSMUSG00000079737  | 3110001122Rik       | -0,750880003                                 | 0,0097                                       |
| ENSMUSG00000057596  | Trim30d             | 0,90358001                                   | 0,01029                                      |
| ENSMUSG00000028037  | Ifi44               | 1,500609994                                  | 0,01043                                      |
| ENSMUSG00000018470  | Kcnab3              | -1,405940056                                 | 0,01045                                      |
| ENSMUSG00000038209  | Itln1               | 5,532730103                                  | 0,01107                                      |
| ENSMUSG00000051373  | Plpp7               | 1,023810029                                  | 0,0112                                       |
| ENSMUSG00000059895  | Ptp4a3              | -0,882499993                                 | 0,01133                                      |
| ENSMUSG00000038528  | Mfsd4b5             | 2,116600037                                  | 0,01153                                      |

|                    |          |              |         |
|--------------------|----------|--------------|---------|
| ENSMUSG0000004446  | Bid      | -0,801479995 | 0,0116  |
| ENSMUSG00000011257 | Pabpc4   | -0,251639992 | 0,01178 |
| ENSMUSG00000038496 | Slc19a3  | 2,203690052  | 0,01201 |
| ENSMUSG00000032549 | Rab6b    | 1,14921999   | 0,0125  |
| ENSMUSG00000034459 | Ifit1    | 1,499390006  | 0,01307 |
| ENSMUSG00000024558 | Mapk4    | -1,247259974 | 0,01347 |
| ENSMUSG00000045573 | Penk     | 3,629780054  | 0,01405 |
| ENSMUSG00000090667 | Gm765    | 3,317660093  | 0,01416 |
| ENSMUSG00000029151 | Slc30a3  | -1,609750032 | 0,0143  |
| ENSMUSG00000031297 | Slc7a3   | -3,121500015 | 0,01506 |
| ENSMUSG00000020325 | Fstl3    | -2,734839916 | 0,01514 |
| ENSMUSG00000020310 | Madcam1  | -2,217689991 | 0,01558 |
| ENSMUSG00000066861 | Oas1g    | 1,274209976  | 0,01731 |
| ENSMUSG00000001729 | Akt1     | -0,960240006 | 0,01781 |
| ENSMUSG00000075552 | Cyp3a41b | 2,851409912  | 0,01785 |
| ENSMUSG00000006269 | Atp6v1b1 | -1,637859941 | 0,01794 |
| ENSMUSG00000025007 | Aldh18a1 | -1,052379966 | 0,01877 |
| ENSMUSG00000031837 | Necab2   | 1,448709965  | 0,01897 |
| ENSMUSG00000015709 | Arnt2    | -1,357640028 | 0,01906 |
| ENSMUSG00000042515 | Mum1l1   | -1,594409943 | 0,0195  |
| ENSMUSG00000079481 | Nhsl2    | 0,98378998   | 0,01985 |
| ENSMUSG00000003458 | Ncstn    | -0,336120009 | 0,02039 |
| ENSMUSG00000055430 | Nap1l5   | -2,812680006 | 0,02094 |
| ENSMUSG00000030107 | Usp18    | 1,002850056  | 0,02115 |
| ENSMUSG00000031380 | Vegfd    | 1,024500012  | 0,02202 |
| ENSMUSG00000092887 | Snord53  | -3,124059916 | 0,0223  |
| ENSMUSG00000038156 | Spon1    | -1,284080029 | 0,0223  |
| ENSMUSG00000073234 | Gm8773   | -3,298710108 | 0,02232 |
| ENSMUSG00000028268 | Gbp3     | 1,12056005   | 0,02271 |
| ENSMUSG00000021831 | Ero1l    | -0,974470019 | 0,02318 |
| ENSMUSG00000076576 | Igkv6-32 | -3,472729921 | 0,02341 |
| ENSMUSG00000021392 | Nol8     | 0,429149985  | 0,0241  |
| ENSMUSG00000025978 | Rftn2    | 1,009899974  | 0,02428 |
| ENSMUSG00000007594 | Hapln4   | -1,640920043 | 0,0244  |
| ENSMUSG00000028435 | Aqp3     | 3,676369905  | 0,02474 |
| ENSMUSG00000042622 | Maff     | -0,82832998  | 0,0253  |
| ENSMUSG00000059430 | Actg2    | -2,402800083 | 0,02538 |
| ENSMUSG00000003752 | Itpkc    | -0,360240012 | 0,02566 |
| ENSMUSG00000032899 | Styk1    | 1,291900039  | 0,02606 |
| ENSMUSG00000026574 | Dpt      | 1,301120043  | 0,02625 |
| ENSMUSG00000030114 | Klrg1    | 3,868419886  | 0,02636 |
| ENSMUSG00000024112 | Cacna1h  | -2,748729944 | 0,02672 |
| ENSMUSG00000024593 | Megf10   | -3,257119894 | 0,02711 |
| ENSMUSG00000053469 | Tg       | 3,840620041  | 0,02741 |
| ENSMUSG00000044177 | Wfikkn2  | -2,340600014 | 0,0284  |
| ENSMUSG00000043943 | Naalad2  | 0,859489977  | 0,02847 |
| ENSMUSG00000025383 | Il23a    | -1,176769972 | 0,02934 |

|                    |               |              |         |
|--------------------|---------------|--------------|---------|
| ENSMUSG00000030662 | Ipo5          | -0,221450001 | 0,02951 |
| ENSMUSG00000026544 | Dusp23        | -1,075790048 | 0,03003 |
| ENSMUSG00000076609 | Igkc          | 1,14952004   | 0,0303  |
| ENSMUSG00000029752 | Asns          | -1,35995996  | 0,03036 |
| ENSMUSG00000016498 | Pdcd1lg2      | -2,759520054 | 0,03059 |
| ENSMUSG00000025537 | Phkg1         | 1,646999955  | 0,03258 |
| ENSMUSG00000003865 | Gys1          | -1,114109993 | 0,03284 |
| ENSMUSG00000026483 | Fam129a       | -1,136590004 | 0,03383 |
| ENSMUSG00000028965 | Tnfrsf9       | -1,433030009 | 0,03408 |
| ENSMUSG00000040016 | Ptger3        | 3,234790087  | 0,03411 |
| ENSMUSG00000041329 | Atp1b2        | -1,505910039 | 0,03436 |
| ENSMUSG00000072770 | Acrbp         | 0,695649981  | 0,03473 |
| ENSMUSG00000020205 | Phlda1        | -1,249109983 | 0,03505 |
| ENSMUSG00000063652 | Slc22a21      | -1,157400012 | 0,03526 |
| ENSMUSG00000026674 | Ddr2          | 0,772620022  | 0,03553 |
| ENSMUSG00000078154 | Gm12184       | -0,628369987 | 0,03622 |
| ENSMUSG00000095079 | Igha          | 2,154360056  | 0,03657 |
| ENSMUSG00000005220 | Corin         | 2,284229994  | 0,03664 |
| ENSMUSG00000090137 | Uba52         | -0,663460016 | 0,03672 |
| ENSMUSG00000023009 | Nckap5l       | -0,739830017 | 0,03729 |
| ENSMUSG00000042215 | Bag2          | -0,853290021 | 0,03817 |
| ENSMUSG00000039246 | Lyplal1       | 0,74605      | 0,0383  |
| ENSMUSG00000015316 | Slamf1        | 3,012020111  | 0,03876 |
| ENSMUSG00000092118 | Fancf         | -0,440429986 | 0,03933 |
| ENSMUSG00000020974 | Pole2         | -1,024979949 | 0,03937 |
| ENSMUSG00000063646 | Jakmip1       | 1,458909988  | 0,03961 |
| ENSMUSG00000030137 | Tuba8         | 1,037469983  | 0,03965 |
| ENSMUSG00000035551 | Igfbpl1       | -1,674640059 | 0,03977 |
| ENSMUSG00000043747 | 1520401A03Rik | 3,304209948  | 0,04004 |
| ENSMUSG00000014813 | Stc1          | -1,568179965 | 0,04015 |
| ENSMUSG00000060188 | Cxcl17        | -1,614050031 | 0,04035 |
| ENSMUSG00000026610 | Esrrg         | -1,563920021 | 0,04098 |
| ENSMUSG00000029093 | Sorcs2        | -1,491870046 | 0,04214 |
| ENSMUSG00000087651 | 1500009L16Rik | -1,60837996  | 0,04219 |
| ENSMUSG00000042826 | Fgf11         | -1,298159957 | 0,04249 |
| ENSMUSG00000026546 | Cfap45        | -1,190840006 | 0,0425  |
| ENSMUSG00000032648 | Pygm          | 0,904380023  | 0,04269 |
| ENSMUSG00000028459 | Cd72          | 0,737919986  | 0,0428  |
| ENSMUSG00000022840 | Adcy5         | -0,916400015 | 0,043   |
| ENSMUSG00000040483 | Xaf1          | 0,847299993  | 0,04319 |
| ENSMUSG00000030921 | Trim30a       | 0,732079983  | 0,04328 |
| ENSMUSG00000037860 | Aim2          | 0,781340003  | 0,04404 |
| ENSMUSG00000035692 | Isg15         | 1,196869969  | 0,04425 |
| ENSMUSG00000068263 | Efcc1         | 1,154999971  | 0,04428 |
| ENSMUSG00000000365 | Rnf17         | 3,551650047  | 0,04433 |
| ENSMUSG00000027313 | Chac1         | -0,864589989 | 0,04473 |
| ENSMUSG00000037161 | Mgarp         | -2,920559883 | 0,04508 |

|                    |         |              |         |
|--------------------|---------|--------------|---------|
| ENSMUSG00000061322 | Dnaic1  | -1,662449956 | 0,04533 |
| ENSMUSG00000045382 | Cxcr4   | -0,869939983 | 0,04534 |
| ENSMUSG00000052776 | Oas1a   | 0,951460004  | 0,04552 |
| ENSMUSG00000058186 | Zfp980  | 2,01673007   | 0,04558 |
| ENSMUSG00000042265 | Trem1   | -2,164520025 | 0,04573 |
| ENSMUSG00000005980 | Dnase1  | 1,24131      | 0,04628 |
| ENSMUSG00000054196 | Cthrc1  | -2,033139944 | 0,04684 |
| ENSMUSG00000028369 | Svep1   | 1,303660035  | 0,04716 |
| ENSMUSG00000026558 | Uck2    | -0,684050024 | 0,04742 |
| ENSMUSG00000030170 | Wnt5b   | -0,81704998  | 0,04746 |
| ENSMUSG00000019055 | Plod1   | -0,217710003 | 0,04746 |
| ENSMUSG00000038530 | Rgs4    | -1,207759976 | 0,04749 |
| ENSMUSG00000020067 | Mypn    | -2,714240074 | 0,04796 |
| ENSMUSG00000048126 | Col6a3  | 0,930830002  | 0,04865 |
| ENSMUSG00000023078 | Cxcl13  | -1,021080017 | 0,04869 |
| ENSMUSG00000041794 | Myrip   | -2,610219955 | 0,04912 |
| ENSMUSG00000026418 | Tnni1   | -2,220999956 | 0,04935 |
| ENSMUSG00000046020 | Pofut1  | 0,265929997  | 0,04954 |
| ENSMUSG00000020335 | Zfp354b | 0,576969981  | 0,04958 |
| ENSMUSG00000019848 | Popdc3  | -3,180439949 | 0,04972 |
| ENSMUSG00000029272 | Sult1e1 | 2,389489889  | 0,04979 |
